# Supplementary material
Source: publisher figshare collection journal article supplement (https://springernature.figshare.com/ndownloader/files/17773217)
Supplement: Supplementary file 1 [file 17773217]

track name=AF visibility=2
1	hq_isoforms.fasta.no5merge.collapsed.gff	exon	1321027	1321127	.	-	.	gene_id "AF:1:1321127-1321418:1321487:1321127-1321546:1321572:-"; transcript_id "AF:1:1321127-1321418:1321487:1321127-1321546:1321572:-:alternative2";
1	hq_isoforms.fasta.no5merge.collapsed.gff	exon	1321418	1321487	.	-	.	gene_id "AF:1:1321127-1321418:1321487:1321127-1321546:1321572:-"; transcript_id "AF:1:1321127-1321418:1321487:1321127-1321546:1321572:-:alternative2";
1	hq_isoforms.fasta.no5merge.collapsed.gff	exon	1321027	1321127	.	-	.	gene_id "AF:1:1321127-1321418:1321487:1321127-1321546:1321572:-"; transcript_id "AF:1:1321127-1321418:1321487:1321127-1321546:1321572:-:alternative1";
1	hq_isoforms.fasta.no5merge.collapsed.gff	exon	1321546	1321572	.	-	.	gene_id "AF:1:1321127-1321418:1321487:1321127-1321546:1321572:-"; transcript_id "AF:1:1321127-1321418:1321487:1321127-1321546:1321572:-:alternative1";
1	hq_isoforms.fasta.no5merge.collapsed.gff	exon	5604112	5604212	.	-	.	gene_id "AF:1:5604212-5608831:5608916:5604212-5609291:5609369:-"; transcript_id "AF:1:5604212-5608831:5608916:5604212-5609291:5609369:-:alternative2";
1	hq_isoforms.fasta.no5merge.collapsed.gff	exon	5608831	5608916	.	-	.	gene_id "AF:1:5604212-5608831:5608916:5604212-5609291:5609369:-"; transcript_id "AF:1:5604212-5608831:5608916:5604212-5609291:5609369:-:alternative2";
1	hq_isoforms.fasta.no5merge.collapsed.gff	exon	5604112	5604212	.	-	.	gene_id "AF:1:5604212-5608831:5608916:5604212-5609291:5609369:-"; transcript_id "AF:1:5604212-5608831:5608916:5604212-5609291:5609369:-:alternative1";
1	hq_isoforms.fasta.no5merge.collapsed.gff	exon	5609291	5609369	.	-	.	gene_id "AF:1:5604212-5608831:5608916:5604212-5609291:5609369:-"; transcript_id "AF:1:5604212-5608831:5608916:5604212-5609291:5609369:-:alternative1";
1	hq_isoforms.fasta.no5merge.collapsed.gff	exon	5604112	5604212	.	-	.	gene_id "AF:1:5604212-5608831:5608916:5604212-5609291:5609401:-"; transcript_id "AF:1:5604212-5608831:5608916:5604212-5609291:5609401:-:alternative2";
1	hq_isoforms.fasta.no5merge.collapsed.gff	exon	5608831	5608916	.	-	.	gene_id "AF:1:5604212-5608831:5608916:5604212-5609291:5609401:-"; transcript_id "AF:1:5604212-5608831:5608916:5604212-5609291:5609401:-:alternative2";
1	hq_isoforms.fasta.no5merge.collapsed.gff	exon	5604112	5604212	.	-	.	gene_id "AF:1:5604212-5608831:5608916:5604212-5609291:5609401:-"; transcript_id "AF:1:5604212-5608831:5608916:5604212-5609291:5609401:-:alternative1";
1	hq_isoforms.fasta.no5merge.collapsed.gff	exon	5609291	5609401	.	-	.	gene_id "AF:1:5604212-5608831:5608916:5604212-5609291:5609401:-"; transcript_id "AF:1:5604212-5608831:5608916:5604212-5609291:5609401:-:alternative1";
1	hq_isoforms.fasta.no5merge.collapsed.gff	exon	5604112	5604212	.	-	.	gene_id "AF:1:5604212-5608831:5608916:5604212-5609291:5609388:-"; transcript_id "AF:1:5604212-5608831:5608916:5604212-5609291:5609388:-:alternative2";
1	hq_isoforms.fasta.no5merge.collapsed.gff	exon	5608831	5608916	.	-	.	gene_id "AF:1:5604212-5608831:5608916:5604212-5609291:5609388:-"; transcript_id "AF:1:5604212-5608831:5608916:5604212-5609291:5609388:-:alternative2";
1	hq_isoforms.fasta.no5merge.collapsed.gff	exon	5604112	5604212	.	-	.	gene_id "AF:1:5604212-5608831:5608916:5604212-5609291:5609388:-"; transcript_id "AF:1:5604212-5608831:5608916:5604212-5609291:5609388:-:alternative1";
1	hq_isoforms.fasta.no5merge.collapsed.gff	exon	5609291	5609388	.	-	.	gene_id "AF:1:5604212-5608831:5608916:5604212-5609291:5609388:-"; transcript_id "AF:1:5604212-5608831:5608916:5604212-5609291:5609388:-:alternative1";
1	hq_isoforms.fasta.no5merge.collapsed.gff	exon	5604112	5604212	.	-	.	gene_id "AF:1:5604212-5608831:5608916:5604212-5609291:5609322:-"; transcript_id "AF:1:5604212-5608831:5608916:5604212-5609291:5609322:-:alternative2";
1	hq_isoforms.fasta.no5merge.collapsed.gff	exon	5608831	5608916	.	-	.	gene_id "AF:1:5604212-5608831:5608916:5604212-5609291:5609322:-"; transcript_id "AF:1:5604212-5608831:5608916:5604212-5609291:5609322:-:alternative2";
1	hq_isoforms.fasta.no5merge.collapsed.gff	exon	5604112	5604212	.	-	.	gene_id "AF:1:5604212-5608831:5608916:5604212-5609291:5609322:-"; transcript_id "AF:1:5604212-5608831:5608916:5604212-5609291:5609322:-:alternative1";
1	hq_isoforms.fasta.no5merge.collapsed.gff	exon	5609291	5609322	.	-	.	gene_id "AF:1:5604212-5608831:5608916:5604212-5609291:5609322:-"; transcript_id "AF:1:5604212-5608831:5608916:5604212-5609291:5609322:-:alternative1";
1	hq_isoforms.fasta.no5merge.collapsed.gff	exon	5604112	5604212	.	-	.	gene_id "AF:1:5604212-5608831:5608916:5604212-5609291:5609403:-"; transcript_id "AF:1:5604212-5608831:5608916:5604212-5609291:5609403:-:alternative2";
1	hq_isoforms.fasta.no5merge.collapsed.gff	exon	5608831	5608916	.	-	.	gene_id "AF:1:5604212-5608831:5608916:5604212-5609291:5609403:-"; transcript_id "AF:1:5604212-5608831:5608916:5604212-5609291:5609403:-:alternative2";
1	hq_isoforms.fasta.no5merge.collapsed.gff	exon	5604112	5604212	.	-	.	gene_id "AF:1:5604212-5608831:5608916:5604212-5609291:5609403:-"; transcript_id "AF:1:5604212-5608831:5608916:5604212-5609291:5609403:-:alternative1";
1	hq_isoforms.fasta.no5merge.collapsed.gff	exon	5609291	5609403	.	-	.	gene_id "AF:1:5604212-5608831:5608916:5604212-5609291:5609403:-"; transcript_id "AF:1:5604212-5608831:5608916:5604212-5609291:5609403:-:alternative1";
1	hq_isoforms.fasta.no5merge.collapsed.gff	exon	5604112	5604212	.	-	.	gene_id "AF:1:5604212-5608831:5608916:5604212-5609291:5609443:-"; transcript_id "AF:1:5604212-5608831:5608916:5604212-5609291:5609443:-:alternative2";
1	hq_isoforms.fasta.no5merge.collapsed.gff	exon	5608831	5608916	.	-	.	gene_id "AF:1:5604212-5608831:5608916:5604212-5609291:5609443:-"; transcript_id "AF:1:5604212-5608831:5608916:5604212-5609291:5609443:-:alternative2";
1	hq_isoforms.fasta.no5merge.collapsed.gff	exon	5604112	5604212	.	-	.	gene_id "AF:1:5604212-5608831:5608916:5604212-5609291:5609443:-"; transcript_id "AF:1:5604212-5608831:5608916:5604212-5609291:5609443:-:alternative1";
1	hq_isoforms.fasta.no5merge.collapsed.gff	exon	5609291	5609443	.	-	.	gene_id "AF:1:5604212-5608831:5608916:5604212-5609291:5609443:-"; transcript_id "AF:1:5604212-5608831:5608916:5604212-5609291:5609443:-:alternative1";
1	hq_isoforms.fasta.no5merge.collapsed.gff	exon	5604112	5604212	.	-	.	gene_id "AF:1:5604212-5608831:5608916:5604212-5609291:5609364:-"; transcript_id "AF:1:5604212-5608831:5608916:5604212-5609291:5609364:-:alternative2";
1	hq_isoforms.fasta.no5merge.collapsed.gff	exon	5608831	5608916	.	-	.	gene_id "AF:1:5604212-5608831:5608916:5604212-5609291:5609364:-"; transcript_id "AF:1:5604212-5608831:5608916:5604212-5609291:5609364:-:alternative2";
1	hq_isoforms.fasta.no5merge.collapsed.gff	exon	5604112	5604212	.	-	.	gene_id "AF:1:5604212-5608831:5608916:5604212-5609291:5609364:-"; transcript_id "AF:1:5604212-5608831:5608916:5604212-5609291:5609364:-:alternative1";
1	hq_isoforms.fasta.no5merge.collapsed.gff	exon	5609291	5609364	.	-	.	gene_id "AF:1:5604212-5608831:5608916:5604212-5609291:5609364:-"; transcript_id "AF:1:5604212-5608831:5608916:5604212-5609291:5609364:-:alternative1";
1	hq_isoforms.fasta.no5merge.collapsed.gff	exon	5604112	5604212	.	-	.	gene_id "AF:1:5604212-5608831:5608916:5604212-5609291:5609354:-"; transcript_id "AF:1:5604212-5608831:5608916:5604212-5609291:5609354:-:alternative2";
1	hq_isoforms.fasta.no5merge.collapsed.gff	exon	5608831	5608916	.	-	.	gene_id "AF:1:5604212-5608831:5608916:5604212-5609291:5609354:-"; transcript_id "AF:1:5604212-5608831:5608916:5604212-5609291:5609354:-:alternative2";
1	hq_isoforms.fasta.no5merge.collapsed.gff	exon	5604112	5604212	.	-	.	gene_id "AF:1:5604212-5608831:5608916:5604212-5609291:5609354:-"; transcript_id "AF:1:5604212-5608831:5608916:5604212-5609291:5609354:-:alternative1";
1	hq_isoforms.fasta.no5merge.collapsed.gff	exon	5609291	5609354	.	-	.	gene_id "AF:1:5604212-5608831:5608916:5604212-5609291:5609354:-"; transcript_id "AF:1:5604212-5608831:5608916:5604212-5609291:5609354:-:alternative1";
1	hq_isoforms.fasta.no5merge.collapsed.gff	exon	5604112	5604212	.	-	.	gene_id "AF:1:5604212-5608831:5608916:5604212-5609291:5609371:-"; transcript_id "AF:1:5604212-5608831:5608916:5604212-5609291:5609371:-:alternative2";
1	hq_isoforms.fasta.no5merge.collapsed.gff	exon	5608831	5608916	.	-	.	gene_id "AF:1:5604212-5608831:5608916:5604212-5609291:5609371:-"; transcript_id "AF:1:5604212-5608831:5608916:5604212-5609291:5609371:-:alternative2";
1	hq_isoforms.fasta.no5merge.collapsed.gff	exon	5604112	5604212	.	-	.	gene_id "AF:1:5604212-5608831:5608916:5604212-5609291:5609371:-"; transcript_id "AF:1:5604212-5608831:5608916:5604212-5609291:5609371:-:alternative1";
1	hq_isoforms.fasta.no5merge.collapsed.gff	exon	5609291	5609371	.	-	.	gene_id "AF:1:5604212-5608831:5608916:5604212-5609291:5609371:-"; transcript_id "AF:1:5604212-5608831:5608916:5604212-5609291:5609371:-:alternative1";
1	hq_isoforms.fasta.no5merge.collapsed.gff	exon	5604112	5604212	.	-	.	gene_id "AF:1:5604212-5608831:5608916:5604212-5609291:5609431:-"; transcript_id "AF:1:5604212-5608831:5608916:5604212-5609291:5609431:-:alternative2";
1	hq_isoforms.fasta.no5merge.collapsed.gff	exon	5608831	5608916	.	-	.	gene_id "AF:1:5604212-5608831:5608916:5604212-5609291:5609431:-"; transcript_id "AF:1:5604212-5608831:5608916:5604212-5609291:5609431:-:alternative2";
1	hq_isoforms.fasta.no5merge.collapsed.gff	exon	5604112	5604212	.	-	.	gene_id "AF:1:5604212-5608831:5608916:5604212-5609291:5609431:-"; transcript_id "AF:1:5604212-5608831:5608916:5604212-5609291:5609431:-:alternative1";
1	hq_isoforms.fasta.no5merge.collapsed.gff	exon	5609291	5609431	.	-	.	gene_id "AF:1:5604212-5608831:5608916:5604212-5609291:5609431:-"; transcript_id "AF:1:5604212-5608831:5608916:5604212-5609291:5609431:-:alternative1";
1	hq_isoforms.fasta.no5merge.collapsed.gff	exon	10528224	10528324	.	-	.	gene_id "AF:1:10528324-10532171:10532273:10528324-10540076:10540135:-"; transcript_id "AF:1:10528324-10532171:10532273:10528324-10540076:10540135:-:alternative2";
1	hq_isoforms.fasta.no5merge.collapsed.gff	exon	10532171	10532273	.	-	.	gene_id "AF:1:10528324-10532171:10532273:10528324-10540076:10540135:-"; transcript_id "AF:1:10528324-10532171:10532273:10528324-10540076:10540135:-:alternative2";
1	hq_isoforms.fasta.no5merge.collapsed.gff	exon	10528224	10528324	.	-	.	gene_id "AF:1:10528324-10532171:10532273:10528324-10540076:10540135:-"; transcript_id "AF:1:10528324-10532171:10532273:10528324-10540076:10540135:-:alternative1";
1	hq_isoforms.fasta.no5merge.collapsed.gff	exon	10540076	10540135	.	-	.	gene_id "AF:1:10528324-10532171:10532273:10528324-10540076:10540135:-"; transcript_id "AF:1:10528324-10532171:10532273:10528324-10540076:10540135:-:alternative1";
1	hq_isoforms.fasta.no5merge.collapsed.gff	exon	10528224	10528324	.	-	.	gene_id "AF:1:10528324-10532171:10532274:10528324-10540076:10540135:-"; transcript_id "AF:1:10528324-10532171:10532274:10528324-10540076:10540135:-:alternative2";
1	hq_isoforms.fasta.no5merge.collapsed.gff	exon	10532171	10532274	.	-	.	gene_id "AF:1:10528324-10532171:10532274:10528324-10540076:10540135:-"; transcript_id "AF:1:10528324-10532171:10532274:10528324-10540076:10540135:-:alternative2";
1	hq_isoforms.fasta.no5merge.collapsed.gff	exon	10528224	10528324	.	-	.	gene_id "AF:1:10528324-10532171:10532274:10528324-10540076:10540135:-"; transcript_id "AF:1:10528324-10532171:10532274:10528324-10540076:10540135:-:alternative1";
1	hq_isoforms.fasta.no5merge.collapsed.gff	exon	10540076	10540135	.	-	.	gene_id "AF:1:10528324-10532171:10532274:10528324-10540076:10540135:-"; transcript_id "AF:1:10528324-10532171:10532274:10528324-10540076:10540135:-:alternative1";
1	hq_isoforms.fasta.no5merge.collapsed.gff	exon	10528224	10528324	.	-	.	gene_id "AF:1:10528324-10532171:10532269:10528324-10540076:10540135:-"; transcript_id "AF:1:10528324-10532171:10532269:10528324-10540076:10540135:-:alternative2";
1	hq_isoforms.fasta.no5merge.collapsed.gff	exon	10532171	10532269	.	-	.	gene_id "AF:1:10528324-10532171:10532269:10528324-10540076:10540135:-"; transcript_id "AF:1:10528324-10532171:10532269:10528324-10540076:10540135:-:alternative2";
1	hq_isoforms.fasta.no5merge.collapsed.gff	exon	10528224	10528324	.	-	.	gene_id "AF:1:10528324-10532171:10532269:10528324-10540076:10540135:-"; transcript_id "AF:1:10528324-10532171:10532269:10528324-10540076:10540135:-:alternative1";
1	hq_isoforms.fasta.no5merge.collapsed.gff	exon	10540076	10540135	.	-	.	gene_id "AF:1:10528324-10532171:10532269:10528324-10540076:10540135:-"; transcript_id "AF:1:10528324-10532171:10532269:10528324-10540076:10540135:-:alternative1";
1	hq_isoforms.fasta.no5merge.collapsed.gff	exon	10528224	10528324	.	-	.	gene_id "AF:1:10528324-10532171:10532275:10528324-10540076:10540135:-"; transcript_id "AF:1:10528324-10532171:10532275:10528324-10540076:10540135:-:alternative2";
1	hq_isoforms.fasta.no5merge.collapsed.gff	exon	10532171	10532275	.	-	.	gene_id "AF:1:10528324-10532171:10532275:10528324-10540076:10540135:-"; transcript_id "AF:1:10528324-10532171:10532275:10528324-10540076:10540135:-:alternative2";
1	hq_isoforms.fasta.no5merge.collapsed.gff	exon	10528224	10528324	.	-	.	gene_id "AF:1:10528324-10532171:10532275:10528324-10540076:10540135:-"; transcript_id "AF:1:10528324-10532171:10532275:10528324-10540076:10540135:-:alternative1";
1	hq_isoforms.fasta.no5merge.collapsed.gff	exon	10540076	10540135	.	-	.	gene_id "AF:1:10528324-10532171:10532275:10528324-10540076:10540135:-"; transcript_id "AF:1:10528324-10532171:10532275:10528324-10540076:10540135:-:alternative1";
1	hq_isoforms.fasta.no5merge.collapsed.gff	exon	10532239	10532339	.	-	.	gene_id "AF:1:10532339-10540076:10540465:10532339-10541114:10541332:-"; transcript_id "AF:1:10532339-10540076:10540465:10532339-10541114:10541332:-:alternative2";
1	hq_isoforms.fasta.no5merge.collapsed.gff	exon	10540076	10540465	.	-	.	gene_id "AF:1:10532339-10540076:10540465:10532339-10541114:10541332:-"; transcript_id "AF:1:10532339-10540076:10540465:10532339-10541114:10541332:-:alternative2";
1	hq_isoforms.fasta.no5merge.collapsed.gff	exon	10532239	10532339	.	-	.	gene_id "AF:1:10532339-10540076:10540465:10532339-10541114:10541332:-"; transcript_id "AF:1:10532339-10540076:10540465:10532339-10541114:10541332:-:alternative1";
1	hq_isoforms.fasta.no5merge.collapsed.gff	exon	10541114	10541332	.	-	.	gene_id "AF:1:10532339-10540076:10540465:10532339-10541114:10541332:-"; transcript_id "AF:1:10532339-10540076:10540465:10532339-10541114:10541332:-:alternative1";
1	hq_isoforms.fasta.no5merge.collapsed.gff	exon	12005249	12005349	.	-	.	gene_id "AF:1:12005349-12008198:12008267:12005349-12037492:12037778:-"; transcript_id "AF:1:12005349-12008198:12008267:12005349-12037492:12037778:-:alternative2";
1	hq_isoforms.fasta.no5merge.collapsed.gff	exon	12008198	12008267	.	-	.	gene_id "AF:1:12005349-12008198:12008267:12005349-12037492:12037778:-"; transcript_id "AF:1:12005349-12008198:12008267:12005349-12037492:12037778:-:alternative2";
1	hq_isoforms.fasta.no5merge.collapsed.gff	exon	12005249	12005349	.	-	.	gene_id "AF:1:12005349-12008198:12008267:12005349-12037492:12037778:-"; transcript_id "AF:1:12005349-12008198:12008267:12005349-12037492:12037778:-:alternative1";
1	hq_isoforms.fasta.no5merge.collapsed.gff	exon	12037492	12037778	.	-	.	gene_id "AF:1:12005349-12008198:12008267:12005349-12037492:12037778:-"; transcript_id "AF:1:12005349-12008198:12008267:12005349-12037492:12037778:-:alternative1";
1	hq_isoforms.fasta.no5merge.collapsed.gff	exon	12005249	12005349	.	-	.	gene_id "AF:1:12005349-12008198:12008267:12005349-12008322:12008378:-"; transcript_id "AF:1:12005349-12008198:12008267:12005349-12008322:12008378:-:alternative2";
1	hq_isoforms.fasta.no5merge.collapsed.gff	exon	12008198	12008267	.	-	.	gene_id "AF:1:12005349-12008198:12008267:12005349-12008322:12008378:-"; transcript_id "AF:1:12005349-12008198:12008267:12005349-12008322:12008378:-:alternative2";
1	hq_isoforms.fasta.no5merge.collapsed.gff	exon	12005249	12005349	.	-	.	gene_id "AF:1:12005349-12008198:12008267:12005349-12008322:12008378:-"; transcript_id "AF:1:12005349-12008198:12008267:12005349-12008322:12008378:-:alternative1";
1	hq_isoforms.fasta.no5merge.collapsed.gff	exon	12008322	12008378	.	-	.	gene_id "AF:1:12005349-12008198:12008267:12005349-12008322:12008378:-"; transcript_id "AF:1:12005349-12008198:12008267:12005349-12008322:12008378:-:alternative1";
1	hq_isoforms.fasta.no5merge.collapsed.gff	exon	12005249	12005349	.	-	.	gene_id "AF:1:12005349-12008322:12008378:12005349-12037492:12037778:-"; transcript_id "AF:1:12005349-12008322:12008378:12005349-12037492:12037778:-:alternative2";
1	hq_isoforms.fasta.no5merge.collapsed.gff	exon	12008322	12008378	.	-	.	gene_id "AF:1:12005349-12008322:12008378:12005349-12037492:12037778:-"; transcript_id "AF:1:12005349-12008322:12008378:12005349-12037492:12037778:-:alternative2";
1	hq_isoforms.fasta.no5merge.collapsed.gff	exon	12005249	12005349	.	-	.	gene_id "AF:1:12005349-12008322:12008378:12005349-12037492:12037778:-"; transcript_id "AF:1:12005349-12008322:12008378:12005349-12037492:12037778:-:alternative1";
1	hq_isoforms.fasta.no5merge.collapsed.gff	exon	12037492	12037778	.	-	.	gene_id "AF:1:12005349-12008322:12008378:12005349-12037492:12037778:-"; transcript_id "AF:1:12005349-12008322:12008378:12005349-12037492:12037778:-:alternative1";
1	hq_isoforms.fasta.no5merge.collapsed.gff	exon	12346982	12347082	.	-	.	gene_id "AF:1:12347082-12352478:12352548:12347082-12357482:12357533:-"; transcript_id "AF:1:12347082-12352478:12352548:12347082-12357482:12357533:-:alternative2";
1	hq_isoforms.fasta.no5merge.collapsed.gff	exon	12352478	12352548	.	-	.	gene_id "AF:1:12347082-12352478:12352548:12347082-12357482:12357533:-"; transcript_id "AF:1:12347082-12352478:12352548:12347082-12357482:12357533:-:alternative2";
1	hq_isoforms.fasta.no5merge.collapsed.gff	exon	12346982	12347082	.	-	.	gene_id "AF:1:12347082-12352478:12352548:12347082-12357482:12357533:-"; transcript_id "AF:1:12347082-12352478:12352548:12347082-12357482:12357533:-:alternative1";
1	hq_isoforms.fasta.no5merge.collapsed.gff	exon	12357482	12357533	.	-	.	gene_id "AF:1:12347082-12352478:12352548:12347082-12357482:12357533:-"; transcript_id "AF:1:12347082-12352478:12352548:12347082-12357482:12357533:-:alternative1";
1	hq_isoforms.fasta.no5merge.collapsed.gff	exon	12346982	12347082	.	-	.	gene_id "AF:1:12347082-12352478:12352548:12347082-12357482:12357559:-"; transcript_id "AF:1:12347082-12352478:12352548:12347082-12357482:12357559:-:alternative2";
1	hq_isoforms.fasta.no5merge.collapsed.gff	exon	12352478	12352548	.	-	.	gene_id "AF:1:12347082-12352478:12352548:12347082-12357482:12357559:-"; transcript_id "AF:1:12347082-12352478:12352548:12347082-12357482:12357559:-:alternative2";
1	hq_isoforms.fasta.no5merge.collapsed.gff	exon	12346982	12347082	.	-	.	gene_id "AF:1:12347082-12352478:12352548:12347082-12357482:12357559:-"; transcript_id "AF:1:12347082-12352478:12352548:12347082-12357482:12357559:-:alternative1";
1	hq_isoforms.fasta.no5merge.collapsed.gff	exon	12357482	12357559	.	-	.	gene_id "AF:1:12347082-12352478:12352548:12347082-12357482:12357559:-"; transcript_id "AF:1:12347082-12352478:12352548:12347082-12357482:12357559:-:alternative1";
1	hq_isoforms.fasta.no5merge.collapsed.gff	exon	12346982	12347082	.	-	.	gene_id "AF:1:12347082-12352478:12352548:12347082-12357482:12357690:-"; transcript_id "AF:1:12347082-12352478:12352548:12347082-12357482:12357690:-:alternative2";
1	hq_isoforms.fasta.no5merge.collapsed.gff	exon	12352478	12352548	.	-	.	gene_id "AF:1:12347082-12352478:12352548:12347082-12357482:12357690:-"; transcript_id "AF:1:12347082-12352478:12352548:12347082-12357482:12357690:-:alternative2";
1	hq_isoforms.fasta.no5merge.collapsed.gff	exon	12346982	12347082	.	-	.	gene_id "AF:1:12347082-12352478:12352548:12347082-12357482:12357690:-"; transcript_id "AF:1:12347082-12352478:12352548:12347082-12357482:12357690:-:alternative1";
1	hq_isoforms.fasta.no5merge.collapsed.gff	exon	12357482	12357690	.	-	.	gene_id "AF:1:12347082-12352478:12352548:12347082-12357482:12357690:-"; transcript_id "AF:1:12347082-12352478:12352548:12347082-12357482:12357690:-:alternative1";
1	hq_isoforms.fasta.no5merge.collapsed.gff	exon	12346982	12347082	.	-	.	gene_id "AF:1:12347082-12352381:12352478:12347082-12357482:12357533:-"; transcript_id "AF:1:12347082-12352381:12352478:12347082-12357482:12357533:-:alternative2";
1	hq_isoforms.fasta.no5merge.collapsed.gff	exon	12352381	12352478	.	-	.	gene_id "AF:1:12347082-12352381:12352478:12347082-12357482:12357533:-"; transcript_id "AF:1:12347082-12352381:12352478:12347082-12357482:12357533:-:alternative2";
1	hq_isoforms.fasta.no5merge.collapsed.gff	exon	12346982	12347082	.	-	.	gene_id "AF:1:12347082-12352381:12352478:12347082-12357482:12357533:-"; transcript_id "AF:1:12347082-12352381:12352478:12347082-12357482:12357533:-:alternative1";
1	hq_isoforms.fasta.no5merge.collapsed.gff	exon	12357482	12357533	.	-	.	gene_id "AF:1:12347082-12352381:12352478:12347082-12357482:12357533:-"; transcript_id "AF:1:12347082-12352381:12352478:12347082-12357482:12357533:-:alternative1";
1	hq_isoforms.fasta.no5merge.collapsed.gff	exon	12346982	12347082	.	-	.	gene_id "AF:1:12347082-12352381:12352478:12347082-12357482:12357559:-"; transcript_id "AF:1:12347082-12352381:12352478:12347082-12357482:12357559:-:alternative2";
1	hq_isoforms.fasta.no5merge.collapsed.gff	exon	12352381	12352478	.	-	.	gene_id "AF:1:12347082-12352381:12352478:12347082-12357482:12357559:-"; transcript_id "AF:1:12347082-12352381:12352478:12347082-12357482:12357559:-:alternative2";
1	hq_isoforms.fasta.no5merge.collapsed.gff	exon	12346982	12347082	.	-	.	gene_id "AF:1:12347082-12352381:12352478:12347082-12357482:12357559:-"; transcript_id "AF:1:12347082-12352381:12352478:12347082-12357482:12357559:-:alternative1";
1	hq_isoforms.fasta.no5merge.collapsed.gff	exon	12357482	12357559	.	-	.	gene_id "AF:1:12347082-12352381:12352478:12347082-12357482:12357559:-"; transcript_id "AF:1:12347082-12352381:12352478:12347082-12357482:12357559:-:alternative1";
1	hq_isoforms.fasta.no5merge.collapsed.gff	exon	12346982	12347082	.	-	.	gene_id "AF:1:12347082-12352381:12352478:12347082-12357482:12357690:-"; transcript_id "AF:1:12347082-12352381:12352478:12347082-12357482:12357690:-:alternative2";
1	hq_isoforms.fasta.no5merge.collapsed.gff	exon	12352381	12352478	.	-	.	gene_id "AF:1:12347082-12352381:12352478:12347082-12357482:12357690:-"; transcript_id "AF:1:12347082-12352381:12352478:12347082-12357482:12357690:-:alternative2";
1	hq_isoforms.fasta.no5merge.collapsed.gff	exon	12346982	12347082	.	-	.	gene_id "AF:1:12347082-12352381:12352478:12347082-12357482:12357690:-"; transcript_id "AF:1:12347082-12352381:12352478:12347082-12357482:12357690:-:alternative1";
1	hq_isoforms.fasta.no5merge.collapsed.gff	exon	12357482	12357690	.	-	.	gene_id "AF:1:12347082-12352381:12352478:12347082-12357482:12357690:-"; transcript_id "AF:1:12347082-12352381:12352478:12347082-12357482:12357690:-:alternative1";
1	hq_isoforms.fasta.no5merge.collapsed.gff	exon	12401713	12401813	.	-	.	gene_id "AF:1:12401813-12402373:12402519:12401813-12403328:12403682:-"; transcript_id "AF:1:12401813-12402373:12402519:12401813-12403328:12403682:-:alternative2";
1	hq_isoforms.fasta.no5merge.collapsed.gff	exon	12402373	12402519	.	-	.	gene_id "AF:1:12401813-12402373:12402519:12401813-12403328:12403682:-"; transcript_id "AF:1:12401813-12402373:12402519:12401813-12403328:12403682:-:alternative2";
1	hq_isoforms.fasta.no5merge.collapsed.gff	exon	12401713	12401813	.	-	.	gene_id "AF:1:12401813-12402373:12402519:12401813-12403328:12403682:-"; transcript_id "AF:1:12401813-12402373:12402519:12401813-12403328:12403682:-:alternative1";
1	hq_isoforms.fasta.no5merge.collapsed.gff	exon	12403328	12403682	.	-	.	gene_id "AF:1:12401813-12402373:12402519:12401813-12403328:12403682:-"; transcript_id "AF:1:12401813-12402373:12402519:12401813-12403328:12403682:-:alternative1";
1	hq_isoforms.fasta.no5merge.collapsed.gff	exon	12401713	12401813	.	-	.	gene_id "AF:1:12401813-12402373:12402513:12401813-12403328:12403682:-"; transcript_id "AF:1:12401813-12402373:12402513:12401813-12403328:12403682:-:alternative2";
1	hq_isoforms.fasta.no5merge.collapsed.gff	exon	12402373	12402513	.	-	.	gene_id "AF:1:12401813-12402373:12402513:12401813-12403328:12403682:-"; transcript_id "AF:1:12401813-12402373:12402513:12401813-12403328:12403682:-:alternative2";
1	hq_isoforms.fasta.no5merge.collapsed.gff	exon	12401713	12401813	.	-	.	gene_id "AF:1:12401813-12402373:12402513:12401813-12403328:12403682:-"; transcript_id "AF:1:12401813-12402373:12402513:12401813-12403328:12403682:-:alternative1";
1	hq_isoforms.fasta.no5merge.collapsed.gff	exon	12403328	12403682	.	-	.	gene_id "AF:1:12401813-12402373:12402513:12401813-12403328:12403682:-"; transcript_id "AF:1:12401813-12402373:12402513:12401813-12403328:12403682:-:alternative1";
1	hq_isoforms.fasta.no5merge.collapsed.gff	exon	13311479	13311579	.	-	.	gene_id "AF:1:13311579-13315678:13315881:13311579-13358243:13358479:-"; transcript_id "AF:1:13311579-13315678:13315881:13311579-13358243:13358479:-:alternative2";
1	hq_isoforms.fasta.no5merge.collapsed.gff	exon	13315678	13315881	.	-	.	gene_id "AF:1:13311579-13315678:13315881:13311579-13358243:13358479:-"; transcript_id "AF:1:13311579-13315678:13315881:13311579-13358243:13358479:-:alternative2";
1	hq_isoforms.fasta.no5merge.collapsed.gff	exon	13311479	13311579	.	-	.	gene_id "AF:1:13311579-13315678:13315881:13311579-13358243:13358479:-"; transcript_id "AF:1:13311579-13315678:13315881:13311579-13358243:13358479:-:alternative1";
1	hq_isoforms.fasta.no5merge.collapsed.gff	exon	13358243	13358479	.	-	.	gene_id "AF:1:13311579-13315678:13315881:13311579-13358243:13358479:-"; transcript_id "AF:1:13311579-13315678:13315881:13311579-13358243:13358479:-:alternative1";
1	hq_isoforms.fasta.no5merge.collapsed.gff	exon	13304854	13304954	.	-	.	gene_id "AF:1:13304954-13305154:13308762:13304954-13311428:13311579:-"; transcript_id "AF:1:13304954-13305154:13308762:13304954-13311428:13311579:-:alternative2";
1	hq_isoforms.fasta.no5merge.collapsed.gff	exon	13305154	13308762	.	-	.	gene_id "AF:1:13304954-13305154:13308762:13304954-13311428:13311579:-"; transcript_id "AF:1:13304954-13305154:13308762:13304954-13311428:13311579:-:alternative2";
1	hq_isoforms.fasta.no5merge.collapsed.gff	exon	13304854	13304954	.	-	.	gene_id "AF:1:13304954-13305154:13308762:13304954-13311428:13311579:-"; transcript_id "AF:1:13304954-13305154:13308762:13304954-13311428:13311579:-:alternative1";
1	hq_isoforms.fasta.no5merge.collapsed.gff	exon	13311428	13311579	.	-	.	gene_id "AF:1:13304954-13305154:13308762:13304954-13311428:13311579:-"; transcript_id "AF:1:13304954-13305154:13308762:13304954-13311428:13311579:-:alternative1";
1	hq_isoforms.fasta.no5merge.collapsed.gff	exon	13505284	13505384	.	-	.	gene_id "AF:1:13505384-13511413:13511585:13505384-13520741:13520891:-"; transcript_id "AF:1:13505384-13511413:13511585:13505384-13520741:13520891:-:alternative2";
1	hq_isoforms.fasta.no5merge.collapsed.gff	exon	13511413	13511585	.	-	.	gene_id "AF:1:13505384-13511413:13511585:13505384-13520741:13520891:-"; transcript_id "AF:1:13505384-13511413:13511585:13505384-13520741:13520891:-:alternative2";
1	hq_isoforms.fasta.no5merge.collapsed.gff	exon	13505284	13505384	.	-	.	gene_id "AF:1:13505384-13511413:13511585:13505384-13520741:13520891:-"; transcript_id "AF:1:13505384-13511413:13511585:13505384-13520741:13520891:-:alternative1";
1	hq_isoforms.fasta.no5merge.collapsed.gff	exon	13520741	13520891	.	-	.	gene_id "AF:1:13505384-13511413:13511585:13505384-13520741:13520891:-"; transcript_id "AF:1:13505384-13511413:13511585:13505384-13520741:13520891:-:alternative1";
1	hq_isoforms.fasta.no5merge.collapsed.gff	exon	13505284	13505384	.	-	.	gene_id "AF:1:13505384-13511413:13511585:13505384-13520741:13520883:-"; transcript_id "AF:1:13505384-13511413:13511585:13505384-13520741:13520883:-:alternative2";
1	hq_isoforms.fasta.no5merge.collapsed.gff	exon	13511413	13511585	.	-	.	gene_id "AF:1:13505384-13511413:13511585:13505384-13520741:13520883:-"; transcript_id "AF:1:13505384-13511413:13511585:13505384-13520741:13520883:-:alternative2";
1	hq_isoforms.fasta.no5merge.collapsed.gff	exon	13505284	13505384	.	-	.	gene_id "AF:1:13505384-13511413:13511585:13505384-13520741:13520883:-"; transcript_id "AF:1:13505384-13511413:13511585:13505384-13520741:13520883:-:alternative1";
1	hq_isoforms.fasta.no5merge.collapsed.gff	exon	13520741	13520883	.	-	.	gene_id "AF:1:13505384-13511413:13511585:13505384-13520741:13520883:-"; transcript_id "AF:1:13505384-13511413:13511585:13505384-13520741:13520883:-:alternative1";
1	hq_isoforms.fasta.no5merge.collapsed.gff	exon	13505284	13505384	.	-	.	gene_id "AF:1:13505384-13511413:13511585:13505384-13520741:13520882:-"; transcript_id "AF:1:13505384-13511413:13511585:13505384-13520741:13520882:-:alternative2";
1	hq_isoforms.fasta.no5merge.collapsed.gff	exon	13511413	13511585	.	-	.	gene_id "AF:1:13505384-13511413:13511585:13505384-13520741:13520882:-"; transcript_id "AF:1:13505384-13511413:13511585:13505384-13520741:13520882:-:alternative2";
1	hq_isoforms.fasta.no5merge.collapsed.gff	exon	13505284	13505384	.	-	.	gene_id "AF:1:13505384-13511413:13511585:13505384-13520741:13520882:-"; transcript_id "AF:1:13505384-13511413:13511585:13505384-13520741:13520882:-:alternative1";
1	hq_isoforms.fasta.no5merge.collapsed.gff	exon	13520741	13520882	.	-	.	gene_id "AF:1:13505384-13511413:13511585:13505384-13520741:13520882:-"; transcript_id "AF:1:13505384-13511413:13511585:13505384-13520741:13520882:-:alternative1";
1	hq_isoforms.fasta.no5merge.collapsed.gff	exon	13505284	13505384	.	-	.	gene_id "AF:1:13505384-13511413:13511585:13505384-13520741:13520833:-"; transcript_id "AF:1:13505384-13511413:13511585:13505384-13520741:13520833:-:alternative2";
1	hq_isoforms.fasta.no5merge.collapsed.gff	exon	13511413	13511585	.	-	.	gene_id "AF:1:13505384-13511413:13511585:13505384-13520741:13520833:-"; transcript_id "AF:1:13505384-13511413:13511585:13505384-13520741:13520833:-:alternative2";
1	hq_isoforms.fasta.no5merge.collapsed.gff	exon	13505284	13505384	.	-	.	gene_id "AF:1:13505384-13511413:13511585:13505384-13520741:13520833:-"; transcript_id "AF:1:13505384-13511413:13511585:13505384-13520741:13520833:-:alternative1";
1	hq_isoforms.fasta.no5merge.collapsed.gff	exon	13520741	13520833	.	-	.	gene_id "AF:1:13505384-13511413:13511585:13505384-13520741:13520833:-"; transcript_id "AF:1:13505384-13511413:13511585:13505384-13520741:13520833:-:alternative1";
1	hq_isoforms.fasta.no5merge.collapsed.gff	exon	13505284	13505384	.	-	.	gene_id "AF:1:13505384-13511413:13511508:13505384-13520741:13520891:-"; transcript_id "AF:1:13505384-13511413:13511508:13505384-13520741:13520891:-:alternative2";
1	hq_isoforms.fasta.no5merge.collapsed.gff	exon	13511413	13511508	.	-	.	gene_id "AF:1:13505384-13511413:13511508:13505384-13520741:13520891:-"; transcript_id "AF:1:13505384-13511413:13511508:13505384-13520741:13520891:-:alternative2";
1	hq_isoforms.fasta.no5merge.collapsed.gff	exon	13505284	13505384	.	-	.	gene_id "AF:1:13505384-13511413:13511508:13505384-13520741:13520891:-"; transcript_id "AF:1:13505384-13511413:13511508:13505384-13520741:13520891:-:alternative1";
1	hq_isoforms.fasta.no5merge.collapsed.gff	exon	13520741	13520891	.	-	.	gene_id "AF:1:13505384-13511413:13511508:13505384-13520741:13520891:-"; transcript_id "AF:1:13505384-13511413:13511508:13505384-13520741:13520891:-:alternative1";
1	hq_isoforms.fasta.no5merge.collapsed.gff	exon	13505284	13505384	.	-	.	gene_id "AF:1:13505384-13511413:13511508:13505384-13520741:13520883:-"; transcript_id "AF:1:13505384-13511413:13511508:13505384-13520741:13520883:-:alternative2";
1	hq_isoforms.fasta.no5merge.collapsed.gff	exon	13511413	13511508	.	-	.	gene_id "AF:1:13505384-13511413:13511508:13505384-13520741:13520883:-"; transcript_id "AF:1:13505384-13511413:13511508:13505384-13520741:13520883:-:alternative2";
1	hq_isoforms.fasta.no5merge.collapsed.gff	exon	13505284	13505384	.	-	.	gene_id "AF:1:13505384-13511413:13511508:13505384-13520741:13520883:-"; transcript_id "AF:1:13505384-13511413:13511508:13505384-13520741:13520883:-:alternative1";
1	hq_isoforms.fasta.no5merge.collapsed.gff	exon	13520741	13520883	.	-	.	gene_id "AF:1:13505384-13511413:13511508:13505384-13520741:13520883:-"; transcript_id "AF:1:13505384-13511413:13511508:13505384-13520741:13520883:-:alternative1";
1	hq_isoforms.fasta.no5merge.collapsed.gff	exon	13505284	13505384	.	-	.	gene_id "AF:1:13505384-13511413:13511508:13505384-13520741:13520882:-"; transcript_id "AF:1:13505384-13511413:13511508:13505384-13520741:13520882:-:alternative2";
1	hq_isoforms.fasta.no5merge.collapsed.gff	exon	13511413	13511508	.	-	.	gene_id "AF:1:13505384-13511413:13511508:13505384-13520741:13520882:-"; transcript_id "AF:1:13505384-13511413:13511508:13505384-13520741:13520882:-:alternative2";
1	hq_isoforms.fasta.no5merge.collapsed.gff	exon	13505284	13505384	.	-	.	gene_id "AF:1:13505384-13511413:13511508:13505384-13520741:13520882:-"; transcript_id "AF:1:13505384-13511413:13511508:13505384-13520741:13520882:-:alternative1";
1	hq_isoforms.fasta.no5merge.collapsed.gff	exon	13520741	13520882	.	-	.	gene_id "AF:1:13505384-13511413:13511508:13505384-13520741:13520882:-"; transcript_id "AF:1:13505384-13511413:13511508:13505384-13520741:13520882:-:alternative1";
1	hq_isoforms.fasta.no5merge.collapsed.gff	exon	13505284	13505384	.	-	.	gene_id "AF:1:13505384-13511413:13511508:13505384-13520741:13520833:-"; transcript_id "AF:1:13505384-13511413:13511508:13505384-13520741:13520833:-:alternative2";
1	hq_isoforms.fasta.no5merge.collapsed.gff	exon	13511413	13511508	.	-	.	gene_id "AF:1:13505384-13511413:13511508:13505384-13520741:13520833:-"; transcript_id "AF:1:13505384-13511413:13511508:13505384-13520741:13520833:-:alternative2";
1	hq_isoforms.fasta.no5merge.collapsed.gff	exon	13505284	13505384	.	-	.	gene_id "AF:1:13505384-13511413:13511508:13505384-13520741:13520833:-"; transcript_id "AF:1:13505384-13511413:13511508:13505384-13520741:13520833:-:alternative1";
1	hq_isoforms.fasta.no5merge.collapsed.gff	exon	13520741	13520833	.	-	.	gene_id "AF:1:13505384-13511413:13511508:13505384-13520741:13520833:-"; transcript_id "AF:1:13505384-13511413:13511508:13505384-13520741:13520833:-:alternative1";
1	hq_isoforms.fasta.no5merge.collapsed.gff	exon	13505284	13505384	.	-	.	gene_id "AF:1:13505384-13510364:13510470:13505384-13520741:13520891:-"; transcript_id "AF:1:13505384-13510364:13510470:13505384-13520741:13520891:-:alternative2";
1	hq_isoforms.fasta.no5merge.collapsed.gff	exon	13510364	13510470	.	-	.	gene_id "AF:1:13505384-13510364:13510470:13505384-13520741:13520891:-"; transcript_id "AF:1:13505384-13510364:13510470:13505384-13520741:13520891:-:alternative2";
1	hq_isoforms.fasta.no5merge.collapsed.gff	exon	13505284	13505384	.	-	.	gene_id "AF:1:13505384-13510364:13510470:13505384-13520741:13520891:-"; transcript_id "AF:1:13505384-13510364:13510470:13505384-13520741:13520891:-:alternative1";
1	hq_isoforms.fasta.no5merge.collapsed.gff	exon	13520741	13520891	.	-	.	gene_id "AF:1:13505384-13510364:13510470:13505384-13520741:13520891:-"; transcript_id "AF:1:13505384-13510364:13510470:13505384-13520741:13520891:-:alternative1";
1	hq_isoforms.fasta.no5merge.collapsed.gff	exon	13505284	13505384	.	-	.	gene_id "AF:1:13505384-13510364:13510470:13505384-13511413:13511585:-"; transcript_id "AF:1:13505384-13510364:13510470:13505384-13511413:13511585:-:alternative2";
1	hq_isoforms.fasta.no5merge.collapsed.gff	exon	13510364	13510470	.	-	.	gene_id "AF:1:13505384-13510364:13510470:13505384-13511413:13511585:-"; transcript_id "AF:1:13505384-13510364:13510470:13505384-13511413:13511585:-:alternative2";
1	hq_isoforms.fasta.no5merge.collapsed.gff	exon	13505284	13505384	.	-	.	gene_id "AF:1:13505384-13510364:13510470:13505384-13511413:13511585:-"; transcript_id "AF:1:13505384-13510364:13510470:13505384-13511413:13511585:-:alternative1";
1	hq_isoforms.fasta.no5merge.collapsed.gff	exon	13511413	13511585	.	-	.	gene_id "AF:1:13505384-13510364:13510470:13505384-13511413:13511585:-"; transcript_id "AF:1:13505384-13510364:13510470:13505384-13511413:13511585:-:alternative1";
1	hq_isoforms.fasta.no5merge.collapsed.gff	exon	13505284	13505384	.	-	.	gene_id "AF:1:13505384-13510364:13510470:13505384-13520741:13520883:-"; transcript_id "AF:1:13505384-13510364:13510470:13505384-13520741:13520883:-:alternative2";
1	hq_isoforms.fasta.no5merge.collapsed.gff	exon	13510364	13510470	.	-	.	gene_id "AF:1:13505384-13510364:13510470:13505384-13520741:13520883:-"; transcript_id "AF:1:13505384-13510364:13510470:13505384-13520741:13520883:-:alternative2";
1	hq_isoforms.fasta.no5merge.collapsed.gff	exon	13505284	13505384	.	-	.	gene_id "AF:1:13505384-13510364:13510470:13505384-13520741:13520883:-"; transcript_id "AF:1:13505384-13510364:13510470:13505384-13520741:13520883:-:alternative1";
1	hq_isoforms.fasta.no5merge.collapsed.gff	exon	13520741	13520883	.	-	.	gene_id "AF:1:13505384-13510364:13510470:13505384-13520741:13520883:-"; transcript_id "AF:1:13505384-13510364:13510470:13505384-13520741:13520883:-:alternative1";
1	hq_isoforms.fasta.no5merge.collapsed.gff	exon	13505284	13505384	.	-	.	gene_id "AF:1:13505384-13510364:13510470:13505384-13511413:13511508:-"; transcript_id "AF:1:13505384-13510364:13510470:13505384-13511413:13511508:-:alternative2";
1	hq_isoforms.fasta.no5merge.collapsed.gff	exon	13510364	13510470	.	-	.	gene_id "AF:1:13505384-13510364:13510470:13505384-13511413:13511508:-"; transcript_id "AF:1:13505384-13510364:13510470:13505384-13511413:13511508:-:alternative2";
1	hq_isoforms.fasta.no5merge.collapsed.gff	exon	13505284	13505384	.	-	.	gene_id "AF:1:13505384-13510364:13510470:13505384-13511413:13511508:-"; transcript_id "AF:1:13505384-13510364:13510470:13505384-13511413:13511508:-:alternative1";
1	hq_isoforms.fasta.no5merge.collapsed.gff	exon	13511413	13511508	.	-	.	gene_id "AF:1:13505384-13510364:13510470:13505384-13511413:13511508:-"; transcript_id "AF:1:13505384-13510364:13510470:13505384-13511413:13511508:-:alternative1";
1	hq_isoforms.fasta.no5merge.collapsed.gff	exon	13505284	13505384	.	-	.	gene_id "AF:1:13505384-13510364:13510470:13505384-13520741:13520882:-"; transcript_id "AF:1:13505384-13510364:13510470:13505384-13520741:13520882:-:alternative2";
1	hq_isoforms.fasta.no5merge.collapsed.gff	exon	13510364	13510470	.	-	.	gene_id "AF:1:13505384-13510364:13510470:13505384-13520741:13520882:-"; transcript_id "AF:1:13505384-13510364:13510470:13505384-13520741:13520882:-:alternative2";
1	hq_isoforms.fasta.no5merge.collapsed.gff	exon	13505284	13505384	.	-	.	gene_id "AF:1:13505384-13510364:13510470:13505384-13520741:13520882:-"; transcript_id "AF:1:13505384-13510364:13510470:13505384-13520741:13520882:-:alternative1";
1	hq_isoforms.fasta.no5merge.collapsed.gff	exon	13520741	13520882	.	-	.	gene_id "AF:1:13505384-13510364:13510470:13505384-13520741:13520882:-"; transcript_id "AF:1:13505384-13510364:13510470:13505384-13520741:13520882:-:alternative1";
1	hq_isoforms.fasta.no5merge.collapsed.gff	exon	13505284	13505384	.	-	.	gene_id "AF:1:13505384-13510364:13510470:13505384-13520741:13520833:-"; transcript_id "AF:1:13505384-13510364:13510470:13505384-13520741:13520833:-:alternative2";
1	hq_isoforms.fasta.no5merge.collapsed.gff	exon	13510364	13510470	.	-	.	gene_id "AF:1:13505384-13510364:13510470:13505384-13520741:13520833:-"; transcript_id "AF:1:13505384-13510364:13510470:13505384-13520741:13520833:-:alternative2";
1	hq_isoforms.fasta.no5merge.collapsed.gff	exon	13505284	13505384	.	-	.	gene_id "AF:1:13505384-13510364:13510470:13505384-13520741:13520833:-"; transcript_id "AF:1:13505384-13510364:13510470:13505384-13520741:13520833:-:alternative1";
1	hq_isoforms.fasta.no5merge.collapsed.gff	exon	13520741	13520833	.	-	.	gene_id "AF:1:13505384-13510364:13510470:13505384-13520741:13520833:-"; transcript_id "AF:1:13505384-13510364:13510470:13505384-13520741:13520833:-:alternative1";
1	hq_isoforms.fasta.no5merge.collapsed.gff	exon	15342382	15342482	.	-	.	gene_id "AF:1:15342482-15346226:15346287:15342482-15347129:15347494:-"; transcript_id "AF:1:15342482-15346226:15346287:15342482-15347129:15347494:-:alternative2";
1	hq_isoforms.fasta.no5merge.collapsed.gff	exon	15346226	15346287	.	-	.	gene_id "AF:1:15342482-15346226:15346287:15342482-15347129:15347494:-"; transcript_id "AF:1:15342482-15346226:15346287:15342482-15347129:15347494:-:alternative2";
1	hq_isoforms.fasta.no5merge.collapsed.gff	exon	15342382	15342482	.	-	.	gene_id "AF:1:15342482-15346226:15346287:15342482-15347129:15347494:-"; transcript_id "AF:1:15342482-15346226:15346287:15342482-15347129:15347494:-:alternative1";
1	hq_isoforms.fasta.no5merge.collapsed.gff	exon	15347129	15347494	.	-	.	gene_id "AF:1:15342482-15346226:15346287:15342482-15347129:15347494:-"; transcript_id "AF:1:15342482-15346226:15346287:15342482-15347129:15347494:-:alternative1";
1	hq_isoforms.fasta.no5merge.collapsed.gff	exon	18686493	18686593	.	-	.	gene_id "AF:1:18686593-18691057:18691318:18686593-18702516:18704237:-"; transcript_id "AF:1:18686593-18691057:18691318:18686593-18702516:18704237:-:alternative2";
1	hq_isoforms.fasta.no5merge.collapsed.gff	exon	18691057	18691318	.	-	.	gene_id "AF:1:18686593-18691057:18691318:18686593-18702516:18704237:-"; transcript_id "AF:1:18686593-18691057:18691318:18686593-18702516:18704237:-:alternative2";
1	hq_isoforms.fasta.no5merge.collapsed.gff	exon	18686493	18686593	.	-	.	gene_id "AF:1:18686593-18691057:18691318:18686593-18702516:18704237:-"; transcript_id "AF:1:18686593-18691057:18691318:18686593-18702516:18704237:-:alternative1";
1	hq_isoforms.fasta.no5merge.collapsed.gff	exon	18702516	18704237	.	-	.	gene_id "AF:1:18686593-18691057:18691318:18686593-18702516:18704237:-"; transcript_id "AF:1:18686593-18691057:18691318:18686593-18702516:18704237:-:alternative1";
1	hq_isoforms.fasta.no5merge.collapsed.gff	exon	18793001	18793101	.	-	.	gene_id "AF:1:18793101-18793379:18793431:18793101-18793707:18793752:-"; transcript_id "AF:1:18793101-18793379:18793431:18793101-18793707:18793752:-:alternative2";
1	hq_isoforms.fasta.no5merge.collapsed.gff	exon	18793379	18793431	.	-	.	gene_id "AF:1:18793101-18793379:18793431:18793101-18793707:18793752:-"; transcript_id "AF:1:18793101-18793379:18793431:18793101-18793707:18793752:-:alternative2";
1	hq_isoforms.fasta.no5merge.collapsed.gff	exon	18793001	18793101	.	-	.	gene_id "AF:1:18793101-18793379:18793431:18793101-18793707:18793752:-"; transcript_id "AF:1:18793101-18793379:18793431:18793101-18793707:18793752:-:alternative1";
1	hq_isoforms.fasta.no5merge.collapsed.gff	exon	18793707	18793752	.	-	.	gene_id "AF:1:18793101-18793379:18793431:18793101-18793707:18793752:-"; transcript_id "AF:1:18793101-18793379:18793431:18793101-18793707:18793752:-:alternative1";
1	hq_isoforms.fasta.no5merge.collapsed.gff	exon	18793001	18793101	.	-	.	gene_id "AF:1:18793101-18793379:18793431:18793101-18793489:18793539:-"; transcript_id "AF:1:18793101-18793379:18793431:18793101-18793489:18793539:-:alternative2";
1	hq_isoforms.fasta.no5merge.collapsed.gff	exon	18793379	18793431	.	-	.	gene_id "AF:1:18793101-18793379:18793431:18793101-18793489:18793539:-"; transcript_id "AF:1:18793101-18793379:18793431:18793101-18793489:18793539:-:alternative2";
1	hq_isoforms.fasta.no5merge.collapsed.gff	exon	18793001	18793101	.	-	.	gene_id "AF:1:18793101-18793379:18793431:18793101-18793489:18793539:-"; transcript_id "AF:1:18793101-18793379:18793431:18793101-18793489:18793539:-:alternative1";
1	hq_isoforms.fasta.no5merge.collapsed.gff	exon	18793489	18793539	.	-	.	gene_id "AF:1:18793101-18793379:18793431:18793101-18793489:18793539:-"; transcript_id "AF:1:18793101-18793379:18793431:18793101-18793489:18793539:-:alternative1";
1	hq_isoforms.fasta.no5merge.collapsed.gff	exon	18793001	18793101	.	-	.	gene_id "AF:1:18793101-18793379:18793431:18793101-18793489:18793524:-"; transcript_id "AF:1:18793101-18793379:18793431:18793101-18793489:18793524:-:alternative2";
1	hq_isoforms.fasta.no5merge.collapsed.gff	exon	18793379	18793431	.	-	.	gene_id "AF:1:18793101-18793379:18793431:18793101-18793489:18793524:-"; transcript_id "AF:1:18793101-18793379:18793431:18793101-18793489:18793524:-:alternative2";
1	hq_isoforms.fasta.no5merge.collapsed.gff	exon	18793001	18793101	.	-	.	gene_id "AF:1:18793101-18793379:18793431:18793101-18793489:18793524:-"; transcript_id "AF:1:18793101-18793379:18793431:18793101-18793489:18793524:-:alternative1";
1	hq_isoforms.fasta.no5merge.collapsed.gff	exon	18793489	18793524	.	-	.	gene_id "AF:1:18793101-18793379:18793431:18793101-18793489:18793524:-"; transcript_id "AF:1:18793101-18793379:18793431:18793101-18793489:18793524:-:alternative1";
1	hq_isoforms.fasta.no5merge.collapsed.gff	exon	18793001	18793101	.	-	.	gene_id "AF:1:18793101-18793379:18793431:18793101-18793707:18793766:-"; transcript_id "AF:1:18793101-18793379:18793431:18793101-18793707:18793766:-:alternative2";
1	hq_isoforms.fasta.no5merge.collapsed.gff	exon	18793379	18793431	.	-	.	gene_id "AF:1:18793101-18793379:18793431:18793101-18793707:18793766:-"; transcript_id "AF:1:18793101-18793379:18793431:18793101-18793707:18793766:-:alternative2";
1	hq_isoforms.fasta.no5merge.collapsed.gff	exon	18793001	18793101	.	-	.	gene_id "AF:1:18793101-18793379:18793431:18793101-18793707:18793766:-"; transcript_id "AF:1:18793101-18793379:18793431:18793101-18793707:18793766:-:alternative1";
1	hq_isoforms.fasta.no5merge.collapsed.gff	exon	18793707	18793766	.	-	.	gene_id "AF:1:18793101-18793379:18793431:18793101-18793707:18793766:-"; transcript_id "AF:1:18793101-18793379:18793431:18793101-18793707:18793766:-:alternative1";
1	hq_isoforms.fasta.no5merge.collapsed.gff	exon	18793001	18793101	.	-	.	gene_id "AF:1:18793101-18793489:18793539:18793101-18793707:18793752:-"; transcript_id "AF:1:18793101-18793489:18793539:18793101-18793707:18793752:-:alternative2";
1	hq_isoforms.fasta.no5merge.collapsed.gff	exon	18793489	18793539	.	-	.	gene_id "AF:1:18793101-18793489:18793539:18793101-18793707:18793752:-"; transcript_id "AF:1:18793101-18793489:18793539:18793101-18793707:18793752:-:alternative2";
1	hq_isoforms.fasta.no5merge.collapsed.gff	exon	18793001	18793101	.	-	.	gene_id "AF:1:18793101-18793489:18793539:18793101-18793707:18793752:-"; transcript_id "AF:1:18793101-18793489:18793539:18793101-18793707:18793752:-:alternative1";
1	hq_isoforms.fasta.no5merge.collapsed.gff	exon	18793707	18793752	.	-	.	gene_id "AF:1:18793101-18793489:18793539:18793101-18793707:18793752:-"; transcript_id "AF:1:18793101-18793489:18793539:18793101-18793707:18793752:-:alternative1";
1	hq_isoforms.fasta.no5merge.collapsed.gff	exon	18793001	18793101	.	-	.	gene_id "AF:1:18793101-18793489:18793539:18793101-18793707:18793766:-"; transcript_id "AF:1:18793101-18793489:18793539:18793101-18793707:18793766:-:alternative2";
1	hq_isoforms.fasta.no5merge.collapsed.gff	exon	18793489	18793539	.	-	.	gene_id "AF:1:18793101-18793489:18793539:18793101-18793707:18793766:-"; transcript_id "AF:1:18793101-18793489:18793539:18793101-18793707:18793766:-:alternative2";
1	hq_isoforms.fasta.no5merge.collapsed.gff	exon	18793001	18793101	.	-	.	gene_id "AF:1:18793101-18793489:18793539:18793101-18793707:18793766:-"; transcript_id "AF:1:18793101-18793489:18793539:18793101-18793707:18793766:-:alternative1";
1	hq_isoforms.fasta.no5merge.collapsed.gff	exon	18793707	18793766	.	-	.	gene_id "AF:1:18793101-18793489:18793539:18793101-18793707:18793766:-"; transcript_id "AF:1:18793101-18793489:18793539:18793101-18793707:18793766:-:alternative1";
1	hq_isoforms.fasta.no5merge.collapsed.gff	exon	18793001	18793101	.	-	.	gene_id "AF:1:18793101-18793489:18793524:18793101-18793707:18793752:-"; transcript_id "AF:1:18793101-18793489:18793524:18793101-18793707:18793752:-:alternative2";
1	hq_isoforms.fasta.no5merge.collapsed.gff	exon	18793489	18793524	.	-	.	gene_id "AF:1:18793101-18793489:18793524:18793101-18793707:18793752:-"; transcript_id "AF:1:18793101-18793489:18793524:18793101-18793707:18793752:-:alternative2";
1	hq_isoforms.fasta.no5merge.collapsed.gff	exon	18793001	18793101	.	-	.	gene_id "AF:1:18793101-18793489:18793524:18793101-18793707:18793752:-"; transcript_id "AF:1:18793101-18793489:18793524:18793101-18793707:18793752:-:alternative1";
1	hq_isoforms.fasta.no5merge.collapsed.gff	exon	18793707	18793752	.	-	.	gene_id "AF:1:18793101-18793489:18793524:18793101-18793707:18793752:-"; transcript_id "AF:1:18793101-18793489:18793524:18793101-18793707:18793752:-:alternative1";
1	hq_isoforms.fasta.no5merge.collapsed.gff	exon	18793001	18793101	.	-	.	gene_id "AF:1:18793101-18793489:18793524:18793101-18793707:18793766:-"; transcript_id "AF:1:18793101-18793489:18793524:18793101-18793707:18793766:-:alternative2";
1	hq_isoforms.fasta.no5merge.collapsed.gff	exon	18793489	18793524	.	-	.	gene_id "AF:1:18793101-18793489:18793524:18793101-18793707:18793766:-"; transcript_id "AF:1:18793101-18793489:18793524:18793101-18793707:18793766:-:alternative2";
1	hq_isoforms.fasta.no5merge.collapsed.gff	exon	18793001	18793101	.	-	.	gene_id "AF:1:18793101-18793489:18793524:18793101-18793707:18793766:-"; transcript_id "AF:1:18793101-18793489:18793524:18793101-18793707:18793766:-:alternative1";
1	hq_isoforms.fasta.no5merge.collapsed.gff	exon	18793707	18793766	.	-	.	gene_id "AF:1:18793101-18793489:18793524:18793101-18793707:18793766:-"; transcript_id "AF:1:18793101-18793489:18793524:18793101-18793707:18793766:-:alternative1";
1	hq_isoforms.fasta.no5merge.collapsed.gff	exon	20504416	20504516	.	-	.	gene_id "AF:1:20504516-20507405:20507465:20504516-20517822:20517988:-"; transcript_id "AF:1:20504516-20507405:20507465:20504516-20517822:20517988:-:alternative2";
1	hq_isoforms.fasta.no5merge.collapsed.gff	exon	20507405	20507465	.	-	.	gene_id "AF:1:20504516-20507405:20507465:20504516-20517822:20517988:-"; transcript_id "AF:1:20504516-20507405:20507465:20504516-20517822:20517988:-:alternative2";
1	hq_isoforms.fasta.no5merge.collapsed.gff	exon	20504416	20504516	.	-	.	gene_id "AF:1:20504516-20507405:20507465:20504516-20517822:20517988:-"; transcript_id "AF:1:20504516-20507405:20507465:20504516-20517822:20517988:-:alternative1";
1	hq_isoforms.fasta.no5merge.collapsed.gff	exon	20517822	20517988	.	-	.	gene_id "AF:1:20504516-20507405:20507465:20504516-20517822:20517988:-"; transcript_id "AF:1:20504516-20507405:20507465:20504516-20517822:20517988:-:alternative1";
1	hq_isoforms.fasta.no5merge.collapsed.gff	exon	20504416	20504516	.	-	.	gene_id "AF:1:20504516-20507405:20507465:20504516-20517822:20518006:-"; transcript_id "AF:1:20504516-20507405:20507465:20504516-20517822:20518006:-:alternative2";
1	hq_isoforms.fasta.no5merge.collapsed.gff	exon	20507405	20507465	.	-	.	gene_id "AF:1:20504516-20507405:20507465:20504516-20517822:20518006:-"; transcript_id "AF:1:20504516-20507405:20507465:20504516-20517822:20518006:-:alternative2";
1	hq_isoforms.fasta.no5merge.collapsed.gff	exon	20504416	20504516	.	-	.	gene_id "AF:1:20504516-20507405:20507465:20504516-20517822:20518006:-"; transcript_id "AF:1:20504516-20507405:20507465:20504516-20517822:20518006:-:alternative1";
1	hq_isoforms.fasta.no5merge.collapsed.gff	exon	20517822	20518006	.	-	.	gene_id "AF:1:20504516-20507405:20507465:20504516-20517822:20518006:-"; transcript_id "AF:1:20504516-20507405:20507465:20504516-20517822:20518006:-:alternative1";
1	hq_isoforms.fasta.no5merge.collapsed.gff	exon	23771475	23771575	.	-	.	gene_id "AF:1:23771575-23771836:23771980:23771575-23772055:23772195:-"; transcript_id "AF:1:23771575-23771836:23771980:23771575-23772055:23772195:-:alternative2";
1	hq_isoforms.fasta.no5merge.collapsed.gff	exon	23771836	23771980	.	-	.	gene_id "AF:1:23771575-23771836:23771980:23771575-23772055:23772195:-"; transcript_id "AF:1:23771575-23771836:23771980:23771575-23772055:23772195:-:alternative2";
1	hq_isoforms.fasta.no5merge.collapsed.gff	exon	23771475	23771575	.	-	.	gene_id "AF:1:23771575-23771836:23771980:23771575-23772055:23772195:-"; transcript_id "AF:1:23771575-23771836:23771980:23771575-23772055:23772195:-:alternative1";
1	hq_isoforms.fasta.no5merge.collapsed.gff	exon	23772055	23772195	.	-	.	gene_id "AF:1:23771575-23771836:23771980:23771575-23772055:23772195:-"; transcript_id "AF:1:23771575-23771836:23771980:23771575-23772055:23772195:-:alternative1";
1	hq_isoforms.fasta.no5merge.collapsed.gff	exon	23771475	23771575	.	-	.	gene_id "AF:1:23771575-23771836:23771980:23771575-23772055:23772197:-"; transcript_id "AF:1:23771575-23771836:23771980:23771575-23772055:23772197:-:alternative2";
1	hq_isoforms.fasta.no5merge.collapsed.gff	exon	23771836	23771980	.	-	.	gene_id "AF:1:23771575-23771836:23771980:23771575-23772055:23772197:-"; transcript_id "AF:1:23771575-23771836:23771980:23771575-23772055:23772197:-:alternative2";
1	hq_isoforms.fasta.no5merge.collapsed.gff	exon	23771475	23771575	.	-	.	gene_id "AF:1:23771575-23771836:23771980:23771575-23772055:23772197:-"; transcript_id "AF:1:23771575-23771836:23771980:23771575-23772055:23772197:-:alternative1";
1	hq_isoforms.fasta.no5merge.collapsed.gff	exon	23772055	23772197	.	-	.	gene_id "AF:1:23771575-23771836:23771980:23771575-23772055:23772197:-"; transcript_id "AF:1:23771575-23771836:23771980:23771575-23772055:23772197:-:alternative1";
1	hq_isoforms.fasta.no5merge.collapsed.gff	exon	23771475	23771575	.	-	.	gene_id "AF:1:23771575-23771836:23771980:23771575-23772055:23772193:-"; transcript_id "AF:1:23771575-23771836:23771980:23771575-23772055:23772193:-:alternative2";
1	hq_isoforms.fasta.no5merge.collapsed.gff	exon	23771836	23771980	.	-	.	gene_id "AF:1:23771575-23771836:23771980:23771575-23772055:23772193:-"; transcript_id "AF:1:23771575-23771836:23771980:23771575-23772055:23772193:-:alternative2";
1	hq_isoforms.fasta.no5merge.collapsed.gff	exon	23771475	23771575	.	-	.	gene_id "AF:1:23771575-23771836:23771980:23771575-23772055:23772193:-"; transcript_id "AF:1:23771575-23771836:23771980:23771575-23772055:23772193:-:alternative1";
1	hq_isoforms.fasta.no5merge.collapsed.gff	exon	23772055	23772193	.	-	.	gene_id "AF:1:23771575-23771836:23771980:23771575-23772055:23772193:-"; transcript_id "AF:1:23771575-23771836:23771980:23771575-23772055:23772193:-:alternative1";
1	hq_isoforms.fasta.no5merge.collapsed.gff	exon	23771475	23771575	.	-	.	gene_id "AF:1:23771575-23771836:23771980:23771575-23772055:23772107:-"; transcript_id "AF:1:23771575-23771836:23771980:23771575-23772055:23772107:-:alternative2";
1	hq_isoforms.fasta.no5merge.collapsed.gff	exon	23771836	23771980	.	-	.	gene_id "AF:1:23771575-23771836:23771980:23771575-23772055:23772107:-"; transcript_id "AF:1:23771575-23771836:23771980:23771575-23772055:23772107:-:alternative2";
1	hq_isoforms.fasta.no5merge.collapsed.gff	exon	23771475	23771575	.	-	.	gene_id "AF:1:23771575-23771836:23771980:23771575-23772055:23772107:-"; transcript_id "AF:1:23771575-23771836:23771980:23771575-23772055:23772107:-:alternative1";
1	hq_isoforms.fasta.no5merge.collapsed.gff	exon	23772055	23772107	.	-	.	gene_id "AF:1:23771575-23771836:23771980:23771575-23772055:23772107:-"; transcript_id "AF:1:23771575-23771836:23771980:23771575-23772055:23772107:-:alternative1";
1	hq_isoforms.fasta.no5merge.collapsed.gff	exon	23771475	23771575	.	-	.	gene_id "AF:1:23771575-23771836:23771980:23771575-23772055:23772189:-"; transcript_id "AF:1:23771575-23771836:23771980:23771575-23772055:23772189:-:alternative2";
1	hq_isoforms.fasta.no5merge.collapsed.gff	exon	23771836	23771980	.	-	.	gene_id "AF:1:23771575-23771836:23771980:23771575-23772055:23772189:-"; transcript_id "AF:1:23771575-23771836:23771980:23771575-23772055:23772189:-:alternative2";
1	hq_isoforms.fasta.no5merge.collapsed.gff	exon	23771475	23771575	.	-	.	gene_id "AF:1:23771575-23771836:23771980:23771575-23772055:23772189:-"; transcript_id "AF:1:23771575-23771836:23771980:23771575-23772055:23772189:-:alternative1";
1	hq_isoforms.fasta.no5merge.collapsed.gff	exon	23772055	23772189	.	-	.	gene_id "AF:1:23771575-23771836:23771980:23771575-23772055:23772189:-"; transcript_id "AF:1:23771575-23771836:23771980:23771575-23772055:23772189:-:alternative1";
1	hq_isoforms.fasta.no5merge.collapsed.gff	exon	23771475	23771575	.	-	.	gene_id "AF:1:23771575-23771836:23771980:23771575-23772055:23772198:-"; transcript_id "AF:1:23771575-23771836:23771980:23771575-23772055:23772198:-:alternative2";
1	hq_isoforms.fasta.no5merge.collapsed.gff	exon	23771836	23771980	.	-	.	gene_id "AF:1:23771575-23771836:23771980:23771575-23772055:23772198:-"; transcript_id "AF:1:23771575-23771836:23771980:23771575-23772055:23772198:-:alternative2";
1	hq_isoforms.fasta.no5merge.collapsed.gff	exon	23771475	23771575	.	-	.	gene_id "AF:1:23771575-23771836:23771980:23771575-23772055:23772198:-"; transcript_id "AF:1:23771575-23771836:23771980:23771575-23772055:23772198:-:alternative1";
1	hq_isoforms.fasta.no5merge.collapsed.gff	exon	23772055	23772198	.	-	.	gene_id "AF:1:23771575-23771836:23771980:23771575-23772055:23772198:-"; transcript_id "AF:1:23771575-23771836:23771980:23771575-23772055:23772198:-:alternative1";
1	hq_isoforms.fasta.no5merge.collapsed.gff	exon	23771475	23771575	.	-	.	gene_id "AF:1:23771575-23771836:23771980:23771575-23772055:23772199:-"; transcript_id "AF:1:23771575-23771836:23771980:23771575-23772055:23772199:-:alternative2";
1	hq_isoforms.fasta.no5merge.collapsed.gff	exon	23771836	23771980	.	-	.	gene_id "AF:1:23771575-23771836:23771980:23771575-23772055:23772199:-"; transcript_id "AF:1:23771575-23771836:23771980:23771575-23772055:23772199:-:alternative2";
1	hq_isoforms.fasta.no5merge.collapsed.gff	exon	23771475	23771575	.	-	.	gene_id "AF:1:23771575-23771836:23771980:23771575-23772055:23772199:-"; transcript_id "AF:1:23771575-23771836:23771980:23771575-23772055:23772199:-:alternative1";
1	hq_isoforms.fasta.no5merge.collapsed.gff	exon	23772055	23772199	.	-	.	gene_id "AF:1:23771575-23771836:23771980:23771575-23772055:23772199:-"; transcript_id "AF:1:23771575-23771836:23771980:23771575-23772055:23772199:-:alternative1";
1	hq_isoforms.fasta.no5merge.collapsed.gff	exon	23771475	23771575	.	-	.	gene_id "AF:1:23771575-23771836:23771980:23771575-23772055:23772192:-"; transcript_id "AF:1:23771575-23771836:23771980:23771575-23772055:23772192:-:alternative2";
1	hq_isoforms.fasta.no5merge.collapsed.gff	exon	23771836	23771980	.	-	.	gene_id "AF:1:23771575-23771836:23771980:23771575-23772055:23772192:-"; transcript_id "AF:1:23771575-23771836:23771980:23771575-23772055:23772192:-:alternative2";
1	hq_isoforms.fasta.no5merge.collapsed.gff	exon	23771475	23771575	.	-	.	gene_id "AF:1:23771575-23771836:23771980:23771575-23772055:23772192:-"; transcript_id "AF:1:23771575-23771836:23771980:23771575-23772055:23772192:-:alternative1";
1	hq_isoforms.fasta.no5merge.collapsed.gff	exon	23772055	23772192	.	-	.	gene_id "AF:1:23771575-23771836:23771980:23771575-23772055:23772192:-"; transcript_id "AF:1:23771575-23771836:23771980:23771575-23772055:23772192:-:alternative1";
1	hq_isoforms.fasta.no5merge.collapsed.gff	exon	25466544	25466644	.	-	.	gene_id "AF:1:25466644-25503461:25503709:25466644-25540747:25541197:-"; transcript_id "AF:1:25466644-25503461:25503709:25466644-25540747:25541197:-:alternative2";
1	hq_isoforms.fasta.no5merge.collapsed.gff	exon	25503461	25503709	.	-	.	gene_id "AF:1:25466644-25503461:25503709:25466644-25540747:25541197:-"; transcript_id "AF:1:25466644-25503461:25503709:25466644-25540747:25541197:-:alternative2";
1	hq_isoforms.fasta.no5merge.collapsed.gff	exon	25466544	25466644	.	-	.	gene_id "AF:1:25466644-25503461:25503709:25466644-25540747:25541197:-"; transcript_id "AF:1:25466644-25503461:25503709:25466644-25540747:25541197:-:alternative1";
1	hq_isoforms.fasta.no5merge.collapsed.gff	exon	25540747	25541197	.	-	.	gene_id "AF:1:25466644-25503461:25503709:25466644-25540747:25541197:-"; transcript_id "AF:1:25466644-25503461:25503709:25466644-25540747:25541197:-:alternative1";
1	hq_isoforms.fasta.no5merge.collapsed.gff	exon	25466544	25466644	.	-	.	gene_id "AF:1:25466644-25503461:25503709:25466644-25540747:25541069:-"; transcript_id "AF:1:25466644-25503461:25503709:25466644-25540747:25541069:-:alternative2";
1	hq_isoforms.fasta.no5merge.collapsed.gff	exon	25503461	25503709	.	-	.	gene_id "AF:1:25466644-25503461:25503709:25466644-25540747:25541069:-"; transcript_id "AF:1:25466644-25503461:25503709:25466644-25540747:25541069:-:alternative2";
1	hq_isoforms.fasta.no5merge.collapsed.gff	exon	25466544	25466644	.	-	.	gene_id "AF:1:25466644-25503461:25503709:25466644-25540747:25541069:-"; transcript_id "AF:1:25466644-25503461:25503709:25466644-25540747:25541069:-:alternative1";
1	hq_isoforms.fasta.no5merge.collapsed.gff	exon	25540747	25541069	.	-	.	gene_id "AF:1:25466644-25503461:25503709:25466644-25540747:25541069:-"; transcript_id "AF:1:25466644-25503461:25503709:25466644-25540747:25541069:-:alternative1";
1	hq_isoforms.fasta.no5merge.collapsed.gff	exon	25466544	25466644	.	-	.	gene_id "AF:1:25466644-25503461:25503709:25466644-25540747:25540937:-"; transcript_id "AF:1:25466644-25503461:25503709:25466644-25540747:25540937:-:alternative2";
1	hq_isoforms.fasta.no5merge.collapsed.gff	exon	25503461	25503709	.	-	.	gene_id "AF:1:25466644-25503461:25503709:25466644-25540747:25540937:-"; transcript_id "AF:1:25466644-25503461:25503709:25466644-25540747:25540937:-:alternative2";
1	hq_isoforms.fasta.no5merge.collapsed.gff	exon	25466544	25466644	.	-	.	gene_id "AF:1:25466644-25503461:25503709:25466644-25540747:25540937:-"; transcript_id "AF:1:25466644-25503461:25503709:25466644-25540747:25540937:-:alternative1";
1	hq_isoforms.fasta.no5merge.collapsed.gff	exon	25540747	25540937	.	-	.	gene_id "AF:1:25466644-25503461:25503709:25466644-25540747:25540937:-"; transcript_id "AF:1:25466644-25503461:25503709:25466644-25540747:25540937:-:alternative1";
1	hq_isoforms.fasta.no5merge.collapsed.gff	exon	25466544	25466644	.	-	.	gene_id "AF:1:25466644-25503461:25503829:25466644-25540747:25541197:-"; transcript_id "AF:1:25466644-25503461:25503829:25466644-25540747:25541197:-:alternative2";
1	hq_isoforms.fasta.no5merge.collapsed.gff	exon	25503461	25503829	.	-	.	gene_id "AF:1:25466644-25503461:25503829:25466644-25540747:25541197:-"; transcript_id "AF:1:25466644-25503461:25503829:25466644-25540747:25541197:-:alternative2";
1	hq_isoforms.fasta.no5merge.collapsed.gff	exon	25466544	25466644	.	-	.	gene_id "AF:1:25466644-25503461:25503829:25466644-25540747:25541197:-"; transcript_id "AF:1:25466644-25503461:25503829:25466644-25540747:25541197:-:alternative1";
1	hq_isoforms.fasta.no5merge.collapsed.gff	exon	25540747	25541197	.	-	.	gene_id "AF:1:25466644-25503461:25503829:25466644-25540747:25541197:-"; transcript_id "AF:1:25466644-25503461:25503829:25466644-25540747:25541197:-:alternative1";
1	hq_isoforms.fasta.no5merge.collapsed.gff	exon	25466544	25466644	.	-	.	gene_id "AF:1:25466644-25503461:25503829:25466644-25540747:25541069:-"; transcript_id "AF:1:25466644-25503461:25503829:25466644-25540747:25541069:-:alternative2";
1	hq_isoforms.fasta.no5merge.collapsed.gff	exon	25503461	25503829	.	-	.	gene_id "AF:1:25466644-25503461:25503829:25466644-25540747:25541069:-"; transcript_id "AF:1:25466644-25503461:25503829:25466644-25540747:25541069:-:alternative2";
1	hq_isoforms.fasta.no5merge.collapsed.gff	exon	25466544	25466644	.	-	.	gene_id "AF:1:25466644-25503461:25503829:25466644-25540747:25541069:-"; transcript_id "AF:1:25466644-25503461:25503829:25466644-25540747:25541069:-:alternative1";
1	hq_isoforms.fasta.no5merge.collapsed.gff	exon	25540747	25541069	.	-	.	gene_id "AF:1:25466644-25503461:25503829:25466644-25540747:25541069:-"; transcript_id "AF:1:25466644-25503461:25503829:25466644-25540747:25541069:-:alternative1";
1	hq_isoforms.fasta.no5merge.collapsed.gff	exon	25466544	25466644	.	-	.	gene_id "AF:1:25466644-25503461:25503829:25466644-25540747:25540937:-"; transcript_id "AF:1:25466644-25503461:25503829:25466644-25540747:25540937:-:alternative2";
1	hq_isoforms.fasta.no5merge.collapsed.gff	exon	25503461	25503829	.	-	.	gene_id "AF:1:25466644-25503461:25503829:25466644-25540747:25540937:-"; transcript_id "AF:1:25466644-25503461:25503829:25466644-25540747:25540937:-:alternative2";
1	hq_isoforms.fasta.no5merge.collapsed.gff	exon	25466544	25466644	.	-	.	gene_id "AF:1:25466644-25503461:25503829:25466644-25540747:25540937:-"; transcript_id "AF:1:25466644-25503461:25503829:25466644-25540747:25540937:-:alternative1";
1	hq_isoforms.fasta.no5merge.collapsed.gff	exon	25540747	25540937	.	-	.	gene_id "AF:1:25466644-25503461:25503829:25466644-25540747:25540937:-"; transcript_id "AF:1:25466644-25503461:25503829:25466644-25540747:25540937:-:alternative1";
1	hq_isoforms.fasta.no5merge.collapsed.gff	exon	25466544	25466644	.	-	.	gene_id "AF:1:25466644-25503461:25503817:25466644-25540747:25541197:-"; transcript_id "AF:1:25466644-25503461:25503817:25466644-25540747:25541197:-:alternative2";
1	hq_isoforms.fasta.no5merge.collapsed.gff	exon	25503461	25503817	.	-	.	gene_id "AF:1:25466644-25503461:25503817:25466644-25540747:25541197:-"; transcript_id "AF:1:25466644-25503461:25503817:25466644-25540747:25541197:-:alternative2";
1	hq_isoforms.fasta.no5merge.collapsed.gff	exon	25466544	25466644	.	-	.	gene_id "AF:1:25466644-25503461:25503817:25466644-25540747:25541197:-"; transcript_id "AF:1:25466644-25503461:25503817:25466644-25540747:25541197:-:alternative1";
1	hq_isoforms.fasta.no5merge.collapsed.gff	exon	25540747	25541197	.	-	.	gene_id "AF:1:25466644-25503461:25503817:25466644-25540747:25541197:-"; transcript_id "AF:1:25466644-25503461:25503817:25466644-25540747:25541197:-:alternative1";
1	hq_isoforms.fasta.no5merge.collapsed.gff	exon	25466544	25466644	.	-	.	gene_id "AF:1:25466644-25503461:25503817:25466644-25540747:25541069:-"; transcript_id "AF:1:25466644-25503461:25503817:25466644-25540747:25541069:-:alternative2";
1	hq_isoforms.fasta.no5merge.collapsed.gff	exon	25503461	25503817	.	-	.	gene_id "AF:1:25466644-25503461:25503817:25466644-25540747:25541069:-"; transcript_id "AF:1:25466644-25503461:25503817:25466644-25540747:25541069:-:alternative2";
1	hq_isoforms.fasta.no5merge.collapsed.gff	exon	25466544	25466644	.	-	.	gene_id "AF:1:25466644-25503461:25503817:25466644-25540747:25541069:-"; transcript_id "AF:1:25466644-25503461:25503817:25466644-25540747:25541069:-:alternative1";
1	hq_isoforms.fasta.no5merge.collapsed.gff	exon	25540747	25541069	.	-	.	gene_id "AF:1:25466644-25503461:25503817:25466644-25540747:25541069:-"; transcript_id "AF:1:25466644-25503461:25503817:25466644-25540747:25541069:-:alternative1";
1	hq_isoforms.fasta.no5merge.collapsed.gff	exon	25466544	25466644	.	-	.	gene_id "AF:1:25466644-25503461:25503817:25466644-25540747:25540937:-"; transcript_id "AF:1:25466644-25503461:25503817:25466644-25540747:25540937:-:alternative2";
1	hq_isoforms.fasta.no5merge.collapsed.gff	exon	25503461	25503817	.	-	.	gene_id "AF:1:25466644-25503461:25503817:25466644-25540747:25540937:-"; transcript_id "AF:1:25466644-25503461:25503817:25466644-25540747:25540937:-:alternative2";
1	hq_isoforms.fasta.no5merge.collapsed.gff	exon	25466544	25466644	.	-	.	gene_id "AF:1:25466644-25503461:25503817:25466644-25540747:25540937:-"; transcript_id "AF:1:25466644-25503461:25503817:25466644-25540747:25540937:-:alternative1";
1	hq_isoforms.fasta.no5merge.collapsed.gff	exon	25540747	25540937	.	-	.	gene_id "AF:1:25466644-25503461:25503817:25466644-25540747:25540937:-"; transcript_id "AF:1:25466644-25503461:25503817:25466644-25540747:25540937:-:alternative1";
1	hq_isoforms.fasta.no5merge.collapsed.gff	exon	25466544	25466644	.	-	.	gene_id "AF:1:25466644-25503461:25503820:25466644-25540747:25541197:-"; transcript_id "AF:1:25466644-25503461:25503820:25466644-25540747:25541197:-:alternative2";
1	hq_isoforms.fasta.no5merge.collapsed.gff	exon	25503461	25503820	.	-	.	gene_id "AF:1:25466644-25503461:25503820:25466644-25540747:25541197:-"; transcript_id "AF:1:25466644-25503461:25503820:25466644-25540747:25541197:-:alternative2";
1	hq_isoforms.fasta.no5merge.collapsed.gff	exon	25466544	25466644	.	-	.	gene_id "AF:1:25466644-25503461:25503820:25466644-25540747:25541197:-"; transcript_id "AF:1:25466644-25503461:25503820:25466644-25540747:25541197:-:alternative1";
1	hq_isoforms.fasta.no5merge.collapsed.gff	exon	25540747	25541197	.	-	.	gene_id "AF:1:25466644-25503461:25503820:25466644-25540747:25541197:-"; transcript_id "AF:1:25466644-25503461:25503820:25466644-25540747:25541197:-:alternative1";
1	hq_isoforms.fasta.no5merge.collapsed.gff	exon	25466544	25466644	.	-	.	gene_id "AF:1:25466644-25503461:25503820:25466644-25540747:25541069:-"; transcript_id "AF:1:25466644-25503461:25503820:25466644-25540747:25541069:-:alternative2";
1	hq_isoforms.fasta.no5merge.collapsed.gff	exon	25503461	25503820	.	-	.	gene_id "AF:1:25466644-25503461:25503820:25466644-25540747:25541069:-"; transcript_id "AF:1:25466644-25503461:25503820:25466644-25540747:25541069:-:alternative2";
1	hq_isoforms.fasta.no5merge.collapsed.gff	exon	25466544	25466644	.	-	.	gene_id "AF:1:25466644-25503461:25503820:25466644-25540747:25541069:-"; transcript_id "AF:1:25466644-25503461:25503820:25466644-25540747:25541069:-:alternative1";
1	hq_isoforms.fasta.no5merge.collapsed.gff	exon	25540747	25541069	.	-	.	gene_id "AF:1:25466644-25503461:25503820:25466644-25540747:25541069:-"; transcript_id "AF:1:25466644-25503461:25503820:25466644-25540747:25541069:-:alternative1";
1	hq_isoforms.fasta.no5merge.collapsed.gff	exon	25466544	25466644	.	-	.	gene_id "AF:1:25466644-25503461:25503820:25466644-25540747:25540937:-"; transcript_id "AF:1:25466644-25503461:25503820:25466644-25540747:25540937:-:alternative2";
1	hq_isoforms.fasta.no5merge.collapsed.gff	exon	25503461	25503820	.	-	.	gene_id "AF:1:25466644-25503461:25503820:25466644-25540747:25540937:-"; transcript_id "AF:1:25466644-25503461:25503820:25466644-25540747:25540937:-:alternative2";
1	hq_isoforms.fasta.no5merge.collapsed.gff	exon	25466544	25466644	.	-	.	gene_id "AF:1:25466644-25503461:25503820:25466644-25540747:25540937:-"; transcript_id "AF:1:25466644-25503461:25503820:25466644-25540747:25540937:-:alternative1";
1	hq_isoforms.fasta.no5merge.collapsed.gff	exon	25540747	25540937	.	-	.	gene_id "AF:1:25466644-25503461:25503820:25466644-25540747:25540937:-"; transcript_id "AF:1:25466644-25503461:25503820:25466644-25540747:25540937:-:alternative1";
1	hq_isoforms.fasta.no5merge.collapsed.gff	exon	25466544	25466644	.	-	.	gene_id "AF:1:25466644-25503461:25503937:25466644-25540747:25541197:-"; transcript_id "AF:1:25466644-25503461:25503937:25466644-25540747:25541197:-:alternative2";
1	hq_isoforms.fasta.no5merge.collapsed.gff	exon	25503461	25503937	.	-	.	gene_id "AF:1:25466644-25503461:25503937:25466644-25540747:25541197:-"; transcript_id "AF:1:25466644-25503461:25503937:25466644-25540747:25541197:-:alternative2";
1	hq_isoforms.fasta.no5merge.collapsed.gff	exon	25466544	25466644	.	-	.	gene_id "AF:1:25466644-25503461:25503937:25466644-25540747:25541197:-"; transcript_id "AF:1:25466644-25503461:25503937:25466644-25540747:25541197:-:alternative1";
1	hq_isoforms.fasta.no5merge.collapsed.gff	exon	25540747	25541197	.	-	.	gene_id "AF:1:25466644-25503461:25503937:25466644-25540747:25541197:-"; transcript_id "AF:1:25466644-25503461:25503937:25466644-25540747:25541197:-:alternative1";
1	hq_isoforms.fasta.no5merge.collapsed.gff	exon	25466544	25466644	.	-	.	gene_id "AF:1:25466644-25503461:25503937:25466644-25540747:25541069:-"; transcript_id "AF:1:25466644-25503461:25503937:25466644-25540747:25541069:-:alternative2";
1	hq_isoforms.fasta.no5merge.collapsed.gff	exon	25503461	25503937	.	-	.	gene_id "AF:1:25466644-25503461:25503937:25466644-25540747:25541069:-"; transcript_id "AF:1:25466644-25503461:25503937:25466644-25540747:25541069:-:alternative2";
1	hq_isoforms.fasta.no5merge.collapsed.gff	exon	25466544	25466644	.	-	.	gene_id "AF:1:25466644-25503461:25503937:25466644-25540747:25541069:-"; transcript_id "AF:1:25466644-25503461:25503937:25466644-25540747:25541069:-:alternative1";
1	hq_isoforms.fasta.no5merge.collapsed.gff	exon	25540747	25541069	.	-	.	gene_id "AF:1:25466644-25503461:25503937:25466644-25540747:25541069:-"; transcript_id "AF:1:25466644-25503461:25503937:25466644-25540747:25541069:-:alternative1";
1	hq_isoforms.fasta.no5merge.collapsed.gff	exon	25466544	25466644	.	-	.	gene_id "AF:1:25466644-25503461:25503937:25466644-25540747:25540937:-"; transcript_id "AF:1:25466644-25503461:25503937:25466644-25540747:25540937:-:alternative2";
1	hq_isoforms.fasta.no5merge.collapsed.gff	exon	25503461	25503937	.	-	.	gene_id "AF:1:25466644-25503461:25503937:25466644-25540747:25540937:-"; transcript_id "AF:1:25466644-25503461:25503937:25466644-25540747:25540937:-:alternative2";
1	hq_isoforms.fasta.no5merge.collapsed.gff	exon	25466544	25466644	.	-	.	gene_id "AF:1:25466644-25503461:25503937:25466644-25540747:25540937:-"; transcript_id "AF:1:25466644-25503461:25503937:25466644-25540747:25540937:-:alternative1";
1	hq_isoforms.fasta.no5merge.collapsed.gff	exon	25540747	25540937	.	-	.	gene_id "AF:1:25466644-25503461:25503937:25466644-25540747:25540937:-"; transcript_id "AF:1:25466644-25503461:25503937:25466644-25540747:25540937:-:alternative1";
1	hq_isoforms.fasta.no5merge.collapsed.gff	exon	25772629	25772729	.	-	.	gene_id "AF:1:25772729-25780277:25780505:25772729-25780565:25780717:-"; transcript_id "AF:1:25772729-25780277:25780505:25772729-25780565:25780717:-:alternative2";
1	hq_isoforms.fasta.no5merge.collapsed.gff	exon	25780277	25780505	.	-	.	gene_id "AF:1:25772729-25780277:25780505:25772729-25780565:25780717:-"; transcript_id "AF:1:25772729-25780277:25780505:25772729-25780565:25780717:-:alternative2";
1	hq_isoforms.fasta.no5merge.collapsed.gff	exon	25772629	25772729	.	-	.	gene_id "AF:1:25772729-25780277:25780505:25772729-25780565:25780717:-"; transcript_id "AF:1:25772729-25780277:25780505:25772729-25780565:25780717:-:alternative1";
1	hq_isoforms.fasta.no5merge.collapsed.gff	exon	25780565	25780717	.	-	.	gene_id "AF:1:25772729-25780277:25780505:25772729-25780565:25780717:-"; transcript_id "AF:1:25772729-25780277:25780505:25772729-25780565:25780717:-:alternative1";
1	hq_isoforms.fasta.no5merge.collapsed.gff	exon	26548674	26548774	.	-	.	gene_id "AF:1:26548774-26549178:26549417:26548774-26550814:26550876:-"; transcript_id "AF:1:26548774-26549178:26549417:26548774-26550814:26550876:-:alternative2";
1	hq_isoforms.fasta.no5merge.collapsed.gff	exon	26549178	26549417	.	-	.	gene_id "AF:1:26548774-26549178:26549417:26548774-26550814:26550876:-"; transcript_id "AF:1:26548774-26549178:26549417:26548774-26550814:26550876:-:alternative2";
1	hq_isoforms.fasta.no5merge.collapsed.gff	exon	26548674	26548774	.	-	.	gene_id "AF:1:26548774-26549178:26549417:26548774-26550814:26550876:-"; transcript_id "AF:1:26548774-26549178:26549417:26548774-26550814:26550876:-:alternative1";
1	hq_isoforms.fasta.no5merge.collapsed.gff	exon	26550814	26550876	.	-	.	gene_id "AF:1:26548774-26549178:26549417:26548774-26550814:26550876:-"; transcript_id "AF:1:26548774-26549178:26549417:26548774-26550814:26550876:-:alternative1";
1	hq_isoforms.fasta.no5merge.collapsed.gff	exon	26548674	26548774	.	-	.	gene_id "AF:1:26548774-26549178:26549417:26548774-26550813:26550830:-"; transcript_id "AF:1:26548774-26549178:26549417:26548774-26550813:26550830:-:alternative2";
1	hq_isoforms.fasta.no5merge.collapsed.gff	exon	26549178	26549417	.	-	.	gene_id "AF:1:26548774-26549178:26549417:26548774-26550813:26550830:-"; transcript_id "AF:1:26548774-26549178:26549417:26548774-26550813:26550830:-:alternative2";
1	hq_isoforms.fasta.no5merge.collapsed.gff	exon	26548674	26548774	.	-	.	gene_id "AF:1:26548774-26549178:26549417:26548774-26550813:26550830:-"; transcript_id "AF:1:26548774-26549178:26549417:26548774-26550813:26550830:-:alternative1";
1	hq_isoforms.fasta.no5merge.collapsed.gff	exon	26550813	26550830	.	-	.	gene_id "AF:1:26548774-26549178:26549417:26548774-26550813:26550830:-"; transcript_id "AF:1:26548774-26549178:26549417:26548774-26550813:26550830:-:alternative1";
1	hq_isoforms.fasta.no5merge.collapsed.gff	exon	26548674	26548774	.	-	.	gene_id "AF:1:26548774-26549178:26549417:26548774-26550813:26550886:-"; transcript_id "AF:1:26548774-26549178:26549417:26548774-26550813:26550886:-:alternative2";
1	hq_isoforms.fasta.no5merge.collapsed.gff	exon	26549178	26549417	.	-	.	gene_id "AF:1:26548774-26549178:26549417:26548774-26550813:26550886:-"; transcript_id "AF:1:26548774-26549178:26549417:26548774-26550813:26550886:-:alternative2";
1	hq_isoforms.fasta.no5merge.collapsed.gff	exon	26548674	26548774	.	-	.	gene_id "AF:1:26548774-26549178:26549417:26548774-26550813:26550886:-"; transcript_id "AF:1:26548774-26549178:26549417:26548774-26550813:26550886:-:alternative1";
1	hq_isoforms.fasta.no5merge.collapsed.gff	exon	26550813	26550886	.	-	.	gene_id "AF:1:26548774-26549178:26549417:26548774-26550813:26550886:-"; transcript_id "AF:1:26548774-26549178:26549417:26548774-26550813:26550886:-:alternative1";
1	hq_isoforms.fasta.no5merge.collapsed.gff	exon	27720476	27720576	.	-	.	gene_id "AF:1:27720576-27721458:27722393:27720576-27722492:27722830:-"; transcript_id "AF:1:27720576-27721458:27722393:27720576-27722492:27722830:-:alternative2";
1	hq_isoforms.fasta.no5merge.collapsed.gff	exon	27721458	27722393	.	-	.	gene_id "AF:1:27720576-27721458:27722393:27720576-27722492:27722830:-"; transcript_id "AF:1:27720576-27721458:27722393:27720576-27722492:27722830:-:alternative2";
1	hq_isoforms.fasta.no5merge.collapsed.gff	exon	27720476	27720576	.	-	.	gene_id "AF:1:27720576-27721458:27722393:27720576-27722492:27722830:-"; transcript_id "AF:1:27720576-27721458:27722393:27720576-27722492:27722830:-:alternative1";
1	hq_isoforms.fasta.no5merge.collapsed.gff	exon	27722492	27722830	.	-	.	gene_id "AF:1:27720576-27721458:27722393:27720576-27722492:27722830:-"; transcript_id "AF:1:27720576-27721458:27722393:27720576-27722492:27722830:-:alternative1";
1	hq_isoforms.fasta.no5merge.collapsed.gff	exon	29273022	29273122	.	-	.	gene_id "AF:1:29273122-29276128:29276205:29273122-29276237:29276278:-"; transcript_id "AF:1:29273122-29276128:29276205:29273122-29276237:29276278:-:alternative2";
1	hq_isoforms.fasta.no5merge.collapsed.gff	exon	29276128	29276205	.	-	.	gene_id "AF:1:29273122-29276128:29276205:29273122-29276237:29276278:-"; transcript_id "AF:1:29273122-29276128:29276205:29273122-29276237:29276278:-:alternative2";
1	hq_isoforms.fasta.no5merge.collapsed.gff	exon	29273022	29273122	.	-	.	gene_id "AF:1:29273122-29276128:29276205:29273122-29276237:29276278:-"; transcript_id "AF:1:29273122-29276128:29276205:29273122-29276237:29276278:-:alternative1";
1	hq_isoforms.fasta.no5merge.collapsed.gff	exon	29276237	29276278	.	-	.	gene_id "AF:1:29273122-29276128:29276205:29273122-29276237:29276278:-"; transcript_id "AF:1:29273122-29276128:29276205:29273122-29276237:29276278:-:alternative1";
1	hq_isoforms.fasta.no5merge.collapsed.gff	exon	32401566	32401666	.	-	.	gene_id "AF:1:32401666-32403138:32403394:32401666-32403637:32403732:-"; transcript_id "AF:1:32401666-32403138:32403394:32401666-32403637:32403732:-:alternative2";
1	hq_isoforms.fasta.no5merge.collapsed.gff	exon	32403138	32403394	.	-	.	gene_id "AF:1:32401666-32403138:32403394:32401666-32403637:32403732:-"; transcript_id "AF:1:32401666-32403138:32403394:32401666-32403637:32403732:-:alternative2";
1	hq_isoforms.fasta.no5merge.collapsed.gff	exon	32401566	32401666	.	-	.	gene_id "AF:1:32401666-32403138:32403394:32401666-32403637:32403732:-"; transcript_id "AF:1:32401666-32403138:32403394:32401666-32403637:32403732:-:alternative1";
1	hq_isoforms.fasta.no5merge.collapsed.gff	exon	32403637	32403732	.	-	.	gene_id "AF:1:32401666-32403138:32403394:32401666-32403637:32403732:-"; transcript_id "AF:1:32401666-32403138:32403394:32401666-32403637:32403732:-:alternative1";
1	hq_isoforms.fasta.no5merge.collapsed.gff	exon	32401566	32401666	.	-	.	gene_id "AF:1:32401666-32403138:32403394:32401666-32403637:32403685:-"; transcript_id "AF:1:32401666-32403138:32403394:32401666-32403637:32403685:-:alternative2";
1	hq_isoforms.fasta.no5merge.collapsed.gff	exon	32403138	32403394	.	-	.	gene_id "AF:1:32401666-32403138:32403394:32401666-32403637:32403685:-"; transcript_id "AF:1:32401666-32403138:32403394:32401666-32403637:32403685:-:alternative2";
1	hq_isoforms.fasta.no5merge.collapsed.gff	exon	32401566	32401666	.	-	.	gene_id "AF:1:32401666-32403138:32403394:32401666-32403637:32403685:-"; transcript_id "AF:1:32401666-32403138:32403394:32401666-32403637:32403685:-:alternative1";
1	hq_isoforms.fasta.no5merge.collapsed.gff	exon	32403637	32403685	.	-	.	gene_id "AF:1:32401666-32403138:32403394:32401666-32403637:32403685:-"; transcript_id "AF:1:32401666-32403138:32403394:32401666-32403637:32403685:-:alternative1";
1	hq_isoforms.fasta.no5merge.collapsed.gff	exon	35742644	35742744	.	-	.	gene_id "AF:1:35742744-35751365:35751537:35742744-35764932:35765070:-"; transcript_id "AF:1:35742744-35751365:35751537:35742744-35764932:35765070:-:alternative2";
1	hq_isoforms.fasta.no5merge.collapsed.gff	exon	35751365	35751537	.	-	.	gene_id "AF:1:35742744-35751365:35751537:35742744-35764932:35765070:-"; transcript_id "AF:1:35742744-35751365:35751537:35742744-35764932:35765070:-:alternative2";
1	hq_isoforms.fasta.no5merge.collapsed.gff	exon	35742644	35742744	.	-	.	gene_id "AF:1:35742744-35751365:35751537:35742744-35764932:35765070:-"; transcript_id "AF:1:35742744-35751365:35751537:35742744-35764932:35765070:-:alternative1";
1	hq_isoforms.fasta.no5merge.collapsed.gff	exon	35764932	35765070	.	-	.	gene_id "AF:1:35742744-35751365:35751537:35742744-35764932:35765070:-"; transcript_id "AF:1:35742744-35751365:35751537:35742744-35764932:35765070:-:alternative1";
1	hq_isoforms.fasta.no5merge.collapsed.gff	exon	35742644	35742744	.	-	.	gene_id "AF:1:35742744-35751365:35751644:35742744-35764932:35765070:-"; transcript_id "AF:1:35742744-35751365:35751644:35742744-35764932:35765070:-:alternative2";
1	hq_isoforms.fasta.no5merge.collapsed.gff	exon	35751365	35751644	.	-	.	gene_id "AF:1:35742744-35751365:35751644:35742744-35764932:35765070:-"; transcript_id "AF:1:35742744-35751365:35751644:35742744-35764932:35765070:-:alternative2";
1	hq_isoforms.fasta.no5merge.collapsed.gff	exon	35742644	35742744	.	-	.	gene_id "AF:1:35742744-35751365:35751644:35742744-35764932:35765070:-"; transcript_id "AF:1:35742744-35751365:35751644:35742744-35764932:35765070:-:alternative1";
1	hq_isoforms.fasta.no5merge.collapsed.gff	exon	35764932	35765070	.	-	.	gene_id "AF:1:35742744-35751365:35751644:35742744-35764932:35765070:-"; transcript_id "AF:1:35742744-35751365:35751644:35742744-35764932:35765070:-:alternative1";
1	hq_isoforms.fasta.no5merge.collapsed.gff	exon	41150065	41150165	.	-	.	gene_id "AF:1:41150165-41150528:41153118:41150165-41153594:41153718:-"; transcript_id "AF:1:41150165-41150528:41153118:41150165-41153594:41153718:-:alternative2";
1	hq_isoforms.fasta.no5merge.collapsed.gff	exon	41150528	41153118	.	-	.	gene_id "AF:1:41150165-41150528:41153118:41150165-41153594:41153718:-"; transcript_id "AF:1:41150165-41150528:41153118:41150165-41153594:41153718:-:alternative2";
1	hq_isoforms.fasta.no5merge.collapsed.gff	exon	41150065	41150165	.	-	.	gene_id "AF:1:41150165-41150528:41153118:41150165-41153594:41153718:-"; transcript_id "AF:1:41150165-41150528:41153118:41150165-41153594:41153718:-:alternative1";
1	hq_isoforms.fasta.no5merge.collapsed.gff	exon	41153594	41153718	.	-	.	gene_id "AF:1:41150165-41150528:41153118:41150165-41153594:41153718:-"; transcript_id "AF:1:41150165-41150528:41153118:41150165-41153594:41153718:-:alternative1";
1	hq_isoforms.fasta.no5merge.collapsed.gff	exon	41150065	41150165	.	-	.	gene_id "AF:1:41150165-41150528:41153118:41150165-41153594:41154441:-"; transcript_id "AF:1:41150165-41150528:41153118:41150165-41153594:41154441:-:alternative2";
1	hq_isoforms.fasta.no5merge.collapsed.gff	exon	41150528	41153118	.	-	.	gene_id "AF:1:41150165-41150528:41153118:41150165-41153594:41154441:-"; transcript_id "AF:1:41150165-41150528:41153118:41150165-41153594:41154441:-:alternative2";
1	hq_isoforms.fasta.no5merge.collapsed.gff	exon	41150065	41150165	.	-	.	gene_id "AF:1:41150165-41150528:41153118:41150165-41153594:41154441:-"; transcript_id "AF:1:41150165-41150528:41153118:41150165-41153594:41154441:-:alternative1";
1	hq_isoforms.fasta.no5merge.collapsed.gff	exon	41153594	41154441	.	-	.	gene_id "AF:1:41150165-41150528:41153118:41150165-41153594:41154441:-"; transcript_id "AF:1:41150165-41150528:41153118:41150165-41153594:41154441:-:alternative1";
1	hq_isoforms.fasta.no5merge.collapsed.gff	exon	41150065	41150165	.	-	.	gene_id "AF:1:41150165-41150528:41153118:41150165-41153594:41156225:-"; transcript_id "AF:1:41150165-41150528:41153118:41150165-41153594:41156225:-:alternative2";
1	hq_isoforms.fasta.no5merge.collapsed.gff	exon	41150528	41153118	.	-	.	gene_id "AF:1:41150165-41150528:41153118:41150165-41153594:41156225:-"; transcript_id "AF:1:41150165-41150528:41153118:41150165-41153594:41156225:-:alternative2";
1	hq_isoforms.fasta.no5merge.collapsed.gff	exon	41150065	41150165	.	-	.	gene_id "AF:1:41150165-41150528:41153118:41150165-41153594:41156225:-"; transcript_id "AF:1:41150165-41150528:41153118:41150165-41153594:41156225:-:alternative1";
1	hq_isoforms.fasta.no5merge.collapsed.gff	exon	41153594	41156225	.	-	.	gene_id "AF:1:41150165-41150528:41153118:41150165-41153594:41156225:-"; transcript_id "AF:1:41150165-41150528:41153118:41150165-41153594:41156225:-:alternative1";
1	hq_isoforms.fasta.no5merge.collapsed.gff	exon	42718405	42718505	.	-	.	gene_id "AF:1:42718505-42723713:42723875:42718505-42773861:42773955:-"; transcript_id "AF:1:42718505-42723713:42723875:42718505-42773861:42773955:-:alternative2";
1	hq_isoforms.fasta.no5merge.collapsed.gff	exon	42723713	42723875	.	-	.	gene_id "AF:1:42718505-42723713:42723875:42718505-42773861:42773955:-"; transcript_id "AF:1:42718505-42723713:42723875:42718505-42773861:42773955:-:alternative2";
1	hq_isoforms.fasta.no5merge.collapsed.gff	exon	42718405	42718505	.	-	.	gene_id "AF:1:42718505-42723713:42723875:42718505-42773861:42773955:-"; transcript_id "AF:1:42718505-42723713:42723875:42718505-42773861:42773955:-:alternative1";
1	hq_isoforms.fasta.no5merge.collapsed.gff	exon	42773861	42773955	.	-	.	gene_id "AF:1:42718505-42723713:42723875:42718505-42773861:42773955:-"; transcript_id "AF:1:42718505-42723713:42723875:42718505-42773861:42773955:-:alternative1";
1	hq_isoforms.fasta.no5merge.collapsed.gff	exon	42718405	42718505	.	-	.	gene_id "AF:1:42718505-42723713:42723875:42718505-42773861:42773968:-"; transcript_id "AF:1:42718505-42723713:42723875:42718505-42773861:42773968:-:alternative2";
1	hq_isoforms.fasta.no5merge.collapsed.gff	exon	42723713	42723875	.	-	.	gene_id "AF:1:42718505-42723713:42723875:42718505-42773861:42773968:-"; transcript_id "AF:1:42718505-42723713:42723875:42718505-42773861:42773968:-:alternative2";
1	hq_isoforms.fasta.no5merge.collapsed.gff	exon	42718405	42718505	.	-	.	gene_id "AF:1:42718505-42723713:42723875:42718505-42773861:42773968:-"; transcript_id "AF:1:42718505-42723713:42723875:42718505-42773861:42773968:-:alternative1";
1	hq_isoforms.fasta.no5merge.collapsed.gff	exon	42773861	42773968	.	-	.	gene_id "AF:1:42718505-42723713:42723875:42718505-42773861:42773968:-"; transcript_id "AF:1:42718505-42723713:42723875:42718505-42773861:42773968:-:alternative1";
1	hq_isoforms.fasta.no5merge.collapsed.gff	exon	42718405	42718505	.	-	.	gene_id "AF:1:42718505-42723713:42723875:42718505-42773861:42773997:-"; transcript_id "AF:1:42718505-42723713:42723875:42718505-42773861:42773997:-:alternative2";
1	hq_isoforms.fasta.no5merge.collapsed.gff	exon	42723713	42723875	.	-	.	gene_id "AF:1:42718505-42723713:42723875:42718505-42773861:42773997:-"; transcript_id "AF:1:42718505-42723713:42723875:42718505-42773861:42773997:-:alternative2";
1	hq_isoforms.fasta.no5merge.collapsed.gff	exon	42718405	42718505	.	-	.	gene_id "AF:1:42718505-42723713:42723875:42718505-42773861:42773997:-"; transcript_id "AF:1:42718505-42723713:42723875:42718505-42773861:42773997:-:alternative1";
1	hq_isoforms.fasta.no5merge.collapsed.gff	exon	42773861	42773997	.	-	.	gene_id "AF:1:42718505-42723713:42723875:42718505-42773861:42773997:-"; transcript_id "AF:1:42718505-42723713:42723875:42718505-42773861:42773997:-:alternative1";
1	hq_isoforms.fasta.no5merge.collapsed.gff	exon	42718405	42718505	.	-	.	gene_id "AF:1:42718505-42723713:42723875:42718505-42726181:42726269:-"; transcript_id "AF:1:42718505-42723713:42723875:42718505-42726181:42726269:-:alternative2";
1	hq_isoforms.fasta.no5merge.collapsed.gff	exon	42723713	42723875	.	-	.	gene_id "AF:1:42718505-42723713:42723875:42718505-42726181:42726269:-"; transcript_id "AF:1:42718505-42723713:42723875:42718505-42726181:42726269:-:alternative2";
1	hq_isoforms.fasta.no5merge.collapsed.gff	exon	42718405	42718505	.	-	.	gene_id "AF:1:42718505-42723713:42723875:42718505-42726181:42726269:-"; transcript_id "AF:1:42718505-42723713:42723875:42718505-42726181:42726269:-:alternative1";
1	hq_isoforms.fasta.no5merge.collapsed.gff	exon	42726181	42726269	.	-	.	gene_id "AF:1:42718505-42723713:42723875:42718505-42726181:42726269:-"; transcript_id "AF:1:42718505-42723713:42723875:42718505-42726181:42726269:-:alternative1";
1	hq_isoforms.fasta.no5merge.collapsed.gff	exon	42718405	42718505	.	-	.	gene_id "AF:1:42718505-42723713:42723875:42718505-42773861:42773972:-"; transcript_id "AF:1:42718505-42723713:42723875:42718505-42773861:42773972:-:alternative2";
1	hq_isoforms.fasta.no5merge.collapsed.gff	exon	42723713	42723875	.	-	.	gene_id "AF:1:42718505-42723713:42723875:42718505-42773861:42773972:-"; transcript_id "AF:1:42718505-42723713:42723875:42718505-42773861:42773972:-:alternative2";
1	hq_isoforms.fasta.no5merge.collapsed.gff	exon	42718405	42718505	.	-	.	gene_id "AF:1:42718505-42723713:42723875:42718505-42773861:42773972:-"; transcript_id "AF:1:42718505-42723713:42723875:42718505-42773861:42773972:-:alternative1";
1	hq_isoforms.fasta.no5merge.collapsed.gff	exon	42773861	42773972	.	-	.	gene_id "AF:1:42718505-42723713:42723875:42718505-42773861:42773972:-"; transcript_id "AF:1:42718505-42723713:42723875:42718505-42773861:42773972:-:alternative1";
1	hq_isoforms.fasta.no5merge.collapsed.gff	exon	42718405	42718505	.	-	.	gene_id "AF:1:42718505-42723713:42723875:42718505-42773861:42773987:-"; transcript_id "AF:1:42718505-42723713:42723875:42718505-42773861:42773987:-:alternative2";
1	hq_isoforms.fasta.no5merge.collapsed.gff	exon	42723713	42723875	.	-	.	gene_id "AF:1:42718505-42723713:42723875:42718505-42773861:42773987:-"; transcript_id "AF:1:42718505-42723713:42723875:42718505-42773861:42773987:-:alternative2";
1	hq_isoforms.fasta.no5merge.collapsed.gff	exon	42718405	42718505	.	-	.	gene_id "AF:1:42718505-42723713:42723875:42718505-42773861:42773987:-"; transcript_id "AF:1:42718505-42723713:42723875:42718505-42773861:42773987:-:alternative1";
1	hq_isoforms.fasta.no5merge.collapsed.gff	exon	42773861	42773987	.	-	.	gene_id "AF:1:42718505-42723713:42723875:42718505-42773861:42773987:-"; transcript_id "AF:1:42718505-42723713:42723875:42718505-42773861:42773987:-:alternative1";
1	hq_isoforms.fasta.no5merge.collapsed.gff	exon	42718405	42718505	.	-	.	gene_id "AF:1:42718505-42723713:42723875:42718505-42773861:42773995:-"; transcript_id "AF:1:42718505-42723713:42723875:42718505-42773861:42773995:-:alternative2";
1	hq_isoforms.fasta.no5merge.collapsed.gff	exon	42723713	42723875	.	-	.	gene_id "AF:1:42718505-42723713:42723875:42718505-42773861:42773995:-"; transcript_id "AF:1:42718505-42723713:42723875:42718505-42773861:42773995:-:alternative2";
1	hq_isoforms.fasta.no5merge.collapsed.gff	exon	42718405	42718505	.	-	.	gene_id "AF:1:42718505-42723713:42723875:42718505-42773861:42773995:-"; transcript_id "AF:1:42718505-42723713:42723875:42718505-42773861:42773995:-:alternative1";
1	hq_isoforms.fasta.no5merge.collapsed.gff	exon	42773861	42773995	.	-	.	gene_id "AF:1:42718505-42723713:42723875:42718505-42773861:42773995:-"; transcript_id "AF:1:42718505-42723713:42723875:42718505-42773861:42773995:-:alternative1";
1	hq_isoforms.fasta.no5merge.collapsed.gff	exon	42718405	42718505	.	-	.	gene_id "AF:1:42718505-42723713:42723875:42718505-42753743:42754110:-"; transcript_id "AF:1:42718505-42723713:42723875:42718505-42753743:42754110:-:alternative2";
1	hq_isoforms.fasta.no5merge.collapsed.gff	exon	42723713	42723875	.	-	.	gene_id "AF:1:42718505-42723713:42723875:42718505-42753743:42754110:-"; transcript_id "AF:1:42718505-42723713:42723875:42718505-42753743:42754110:-:alternative2";
1	hq_isoforms.fasta.no5merge.collapsed.gff	exon	42718405	42718505	.	-	.	gene_id "AF:1:42718505-42723713:42723875:42718505-42753743:42754110:-"; transcript_id "AF:1:42718505-42723713:42723875:42718505-42753743:42754110:-:alternative1";
1	hq_isoforms.fasta.no5merge.collapsed.gff	exon	42753743	42754110	.	-	.	gene_id "AF:1:42718505-42723713:42723875:42718505-42753743:42754110:-"; transcript_id "AF:1:42718505-42723713:42723875:42718505-42753743:42754110:-:alternative1";
1	hq_isoforms.fasta.no5merge.collapsed.gff	exon	42718405	42718505	.	-	.	gene_id "AF:1:42718505-42726181:42726269:42718505-42773861:42773955:-"; transcript_id "AF:1:42718505-42726181:42726269:42718505-42773861:42773955:-:alternative2";
1	hq_isoforms.fasta.no5merge.collapsed.gff	exon	42726181	42726269	.	-	.	gene_id "AF:1:42718505-42726181:42726269:42718505-42773861:42773955:-"; transcript_id "AF:1:42718505-42726181:42726269:42718505-42773861:42773955:-:alternative2";
1	hq_isoforms.fasta.no5merge.collapsed.gff	exon	42718405	42718505	.	-	.	gene_id "AF:1:42718505-42726181:42726269:42718505-42773861:42773955:-"; transcript_id "AF:1:42718505-42726181:42726269:42718505-42773861:42773955:-:alternative1";
1	hq_isoforms.fasta.no5merge.collapsed.gff	exon	42773861	42773955	.	-	.	gene_id "AF:1:42718505-42726181:42726269:42718505-42773861:42773955:-"; transcript_id "AF:1:42718505-42726181:42726269:42718505-42773861:42773955:-:alternative1";
1	hq_isoforms.fasta.no5merge.collapsed.gff	exon	42718405	42718505	.	-	.	gene_id "AF:1:42718505-42726181:42726269:42718505-42773861:42773968:-"; transcript_id "AF:1:42718505-42726181:42726269:42718505-42773861:42773968:-:alternative2";
1	hq_isoforms.fasta.no5merge.collapsed.gff	exon	42726181	42726269	.	-	.	gene_id "AF:1:42718505-42726181:42726269:42718505-42773861:42773968:-"; transcript_id "AF:1:42718505-42726181:42726269:42718505-42773861:42773968:-:alternative2";
1	hq_isoforms.fasta.no5merge.collapsed.gff	exon	42718405	42718505	.	-	.	gene_id "AF:1:42718505-42726181:42726269:42718505-42773861:42773968:-"; transcript_id "AF:1:42718505-42726181:42726269:42718505-42773861:42773968:-:alternative1";
1	hq_isoforms.fasta.no5merge.collapsed.gff	exon	42773861	42773968	.	-	.	gene_id "AF:1:42718505-42726181:42726269:42718505-42773861:42773968:-"; transcript_id "AF:1:42718505-42726181:42726269:42718505-42773861:42773968:-:alternative1";
1	hq_isoforms.fasta.no5merge.collapsed.gff	exon	42718405	42718505	.	-	.	gene_id "AF:1:42718505-42726181:42726269:42718505-42773861:42773997:-"; transcript_id "AF:1:42718505-42726181:42726269:42718505-42773861:42773997:-:alternative2";
1	hq_isoforms.fasta.no5merge.collapsed.gff	exon	42726181	42726269	.	-	.	gene_id "AF:1:42718505-42726181:42726269:42718505-42773861:42773997:-"; transcript_id "AF:1:42718505-42726181:42726269:42718505-42773861:42773997:-:alternative2";
1	hq_isoforms.fasta.no5merge.collapsed.gff	exon	42718405	42718505	.	-	.	gene_id "AF:1:42718505-42726181:42726269:42718505-42773861:42773997:-"; transcript_id "AF:1:42718505-42726181:42726269:42718505-42773861:42773997:-:alternative1";
1	hq_isoforms.fasta.no5merge.collapsed.gff	exon	42773861	42773997	.	-	.	gene_id "AF:1:42718505-42726181:42726269:42718505-42773861:42773997:-"; transcript_id "AF:1:42718505-42726181:42726269:42718505-42773861:42773997:-:alternative1";
1	hq_isoforms.fasta.no5merge.collapsed.gff	exon	42718405	42718505	.	-	.	gene_id "AF:1:42718505-42726181:42726269:42718505-42773861:42773972:-"; transcript_id "AF:1:42718505-42726181:42726269:42718505-42773861:42773972:-:alternative2";
1	hq_isoforms.fasta.no5merge.collapsed.gff	exon	42726181	42726269	.	-	.	gene_id "AF:1:42718505-42726181:42726269:42718505-42773861:42773972:-"; transcript_id "AF:1:42718505-42726181:42726269:42718505-42773861:42773972:-:alternative2";
1	hq_isoforms.fasta.no5merge.collapsed.gff	exon	42718405	42718505	.	-	.	gene_id "AF:1:42718505-42726181:42726269:42718505-42773861:42773972:-"; transcript_id "AF:1:42718505-42726181:42726269:42718505-42773861:42773972:-:alternative1";
1	hq_isoforms.fasta.no5merge.collapsed.gff	exon	42773861	42773972	.	-	.	gene_id "AF:1:42718505-42726181:42726269:42718505-42773861:42773972:-"; transcript_id "AF:1:42718505-42726181:42726269:42718505-42773861:42773972:-:alternative1";
1	hq_isoforms.fasta.no5merge.collapsed.gff	exon	42718405	42718505	.	-	.	gene_id "AF:1:42718505-42726181:42726269:42718505-42773861:42773987:-"; transcript_id "AF:1:42718505-42726181:42726269:42718505-42773861:42773987:-:alternative2";
1	hq_isoforms.fasta.no5merge.collapsed.gff	exon	42726181	42726269	.	-	.	gene_id "AF:1:42718505-42726181:42726269:42718505-42773861:42773987:-"; transcript_id "AF:1:42718505-42726181:42726269:42718505-42773861:42773987:-:alternative2";
1	hq_isoforms.fasta.no5merge.collapsed.gff	exon	42718405	42718505	.	-	.	gene_id "AF:1:42718505-42726181:42726269:42718505-42773861:42773987:-"; transcript_id "AF:1:42718505-42726181:42726269:42718505-42773861:42773987:-:alternative1";
1	hq_isoforms.fasta.no5merge.collapsed.gff	exon	42773861	42773987	.	-	.	gene_id "AF:1:42718505-42726181:42726269:42718505-42773861:42773987:-"; transcript_id "AF:1:42718505-42726181:42726269:42718505-42773861:42773987:-:alternative1";
1	hq_isoforms.fasta.no5merge.collapsed.gff	exon	42718405	42718505	.	-	.	gene_id "AF:1:42718505-42726181:42726269:42718505-42773861:42773995:-"; transcript_id "AF:1:42718505-42726181:42726269:42718505-42773861:42773995:-:alternative2";
1	hq_isoforms.fasta.no5merge.collapsed.gff	exon	42726181	42726269	.	-	.	gene_id "AF:1:42718505-42726181:42726269:42718505-42773861:42773995:-"; transcript_id "AF:1:42718505-42726181:42726269:42718505-42773861:42773995:-:alternative2";
1	hq_isoforms.fasta.no5merge.collapsed.gff	exon	42718405	42718505	.	-	.	gene_id "AF:1:42718505-42726181:42726269:42718505-42773861:42773995:-"; transcript_id "AF:1:42718505-42726181:42726269:42718505-42773861:42773995:-:alternative1";
1	hq_isoforms.fasta.no5merge.collapsed.gff	exon	42773861	42773995	.	-	.	gene_id "AF:1:42718505-42726181:42726269:42718505-42773861:42773995:-"; transcript_id "AF:1:42718505-42726181:42726269:42718505-42773861:42773995:-:alternative1";
1	hq_isoforms.fasta.no5merge.collapsed.gff	exon	42718405	42718505	.	-	.	gene_id "AF:1:42718505-42726181:42726269:42718505-42753743:42754110:-"; transcript_id "AF:1:42718505-42726181:42726269:42718505-42753743:42754110:-:alternative2";
1	hq_isoforms.fasta.no5merge.collapsed.gff	exon	42726181	42726269	.	-	.	gene_id "AF:1:42718505-42726181:42726269:42718505-42753743:42754110:-"; transcript_id "AF:1:42718505-42726181:42726269:42718505-42753743:42754110:-:alternative2";
1	hq_isoforms.fasta.no5merge.collapsed.gff	exon	42718405	42718505	.	-	.	gene_id "AF:1:42718505-42726181:42726269:42718505-42753743:42754110:-"; transcript_id "AF:1:42718505-42726181:42726269:42718505-42753743:42754110:-:alternative1";
1	hq_isoforms.fasta.no5merge.collapsed.gff	exon	42753743	42754110	.	-	.	gene_id "AF:1:42718505-42726181:42726269:42718505-42753743:42754110:-"; transcript_id "AF:1:42718505-42726181:42726269:42718505-42753743:42754110:-:alternative1";
1	hq_isoforms.fasta.no5merge.collapsed.gff	exon	42718405	42718505	.	-	.	gene_id "AF:1:42718505-42723709:42723868:42718505-42773861:42773955:-"; transcript_id "AF:1:42718505-42723709:42723868:42718505-42773861:42773955:-:alternative2";
1	hq_isoforms.fasta.no5merge.collapsed.gff	exon	42723709	42723868	.	-	.	gene_id "AF:1:42718505-42723709:42723868:42718505-42773861:42773955:-"; transcript_id "AF:1:42718505-42723709:42723868:42718505-42773861:42773955:-:alternative2";
1	hq_isoforms.fasta.no5merge.collapsed.gff	exon	42718405	42718505	.	-	.	gene_id "AF:1:42718505-42723709:42723868:42718505-42773861:42773955:-"; transcript_id "AF:1:42718505-42723709:42723868:42718505-42773861:42773955:-:alternative1";
1	hq_isoforms.fasta.no5merge.collapsed.gff	exon	42773861	42773955	.	-	.	gene_id "AF:1:42718505-42723709:42723868:42718505-42773861:42773955:-"; transcript_id "AF:1:42718505-42723709:42723868:42718505-42773861:42773955:-:alternative1";
1	hq_isoforms.fasta.no5merge.collapsed.gff	exon	42718405	42718505	.	-	.	gene_id "AF:1:42718505-42723709:42723868:42718505-42773861:42773968:-"; transcript_id "AF:1:42718505-42723709:42723868:42718505-42773861:42773968:-:alternative2";
1	hq_isoforms.fasta.no5merge.collapsed.gff	exon	42723709	42723868	.	-	.	gene_id "AF:1:42718505-42723709:42723868:42718505-42773861:42773968:-"; transcript_id "AF:1:42718505-42723709:42723868:42718505-42773861:42773968:-:alternative2";
1	hq_isoforms.fasta.no5merge.collapsed.gff	exon	42718405	42718505	.	-	.	gene_id "AF:1:42718505-42723709:42723868:42718505-42773861:42773968:-"; transcript_id "AF:1:42718505-42723709:42723868:42718505-42773861:42773968:-:alternative1";
1	hq_isoforms.fasta.no5merge.collapsed.gff	exon	42773861	42773968	.	-	.	gene_id "AF:1:42718505-42723709:42723868:42718505-42773861:42773968:-"; transcript_id "AF:1:42718505-42723709:42723868:42718505-42773861:42773968:-:alternative1";
1	hq_isoforms.fasta.no5merge.collapsed.gff	exon	42718405	42718505	.	-	.	gene_id "AF:1:42718505-42723709:42723868:42718505-42773861:42773997:-"; transcript_id "AF:1:42718505-42723709:42723868:42718505-42773861:42773997:-:alternative2";
1	hq_isoforms.fasta.no5merge.collapsed.gff	exon	42723709	42723868	.	-	.	gene_id "AF:1:42718505-42723709:42723868:42718505-42773861:42773997:-"; transcript_id "AF:1:42718505-42723709:42723868:42718505-42773861:42773997:-:alternative2";
1	hq_isoforms.fasta.no5merge.collapsed.gff	exon	42718405	42718505	.	-	.	gene_id "AF:1:42718505-42723709:42723868:42718505-42773861:42773997:-"; transcript_id "AF:1:42718505-42723709:42723868:42718505-42773861:42773997:-:alternative1";
1	hq_isoforms.fasta.no5merge.collapsed.gff	exon	42773861	42773997	.	-	.	gene_id "AF:1:42718505-42723709:42723868:42718505-42773861:42773997:-"; transcript_id "AF:1:42718505-42723709:42723868:42718505-42773861:42773997:-:alternative1";
1	hq_isoforms.fasta.no5merge.collapsed.gff	exon	42718405	42718505	.	-	.	gene_id "AF:1:42718505-42723709:42723868:42718505-42726181:42726269:-"; transcript_id "AF:1:42718505-42723709:42723868:42718505-42726181:42726269:-:alternative2";
1	hq_isoforms.fasta.no5merge.collapsed.gff	exon	42723709	42723868	.	-	.	gene_id "AF:1:42718505-42723709:42723868:42718505-42726181:42726269:-"; transcript_id "AF:1:42718505-42723709:42723868:42718505-42726181:42726269:-:alternative2";
1	hq_isoforms.fasta.no5merge.collapsed.gff	exon	42718405	42718505	.	-	.	gene_id "AF:1:42718505-42723709:42723868:42718505-42726181:42726269:-"; transcript_id "AF:1:42718505-42723709:42723868:42718505-42726181:42726269:-:alternative1";
1	hq_isoforms.fasta.no5merge.collapsed.gff	exon	42726181	42726269	.	-	.	gene_id "AF:1:42718505-42723709:42723868:42718505-42726181:42726269:-"; transcript_id "AF:1:42718505-42723709:42723868:42718505-42726181:42726269:-:alternative1";
1	hq_isoforms.fasta.no5merge.collapsed.gff	exon	42718405	42718505	.	-	.	gene_id "AF:1:42718505-42723709:42723868:42718505-42773861:42773972:-"; transcript_id "AF:1:42718505-42723709:42723868:42718505-42773861:42773972:-:alternative2";
1	hq_isoforms.fasta.no5merge.collapsed.gff	exon	42723709	42723868	.	-	.	gene_id "AF:1:42718505-42723709:42723868:42718505-42773861:42773972:-"; transcript_id "AF:1:42718505-42723709:42723868:42718505-42773861:42773972:-:alternative2";
1	hq_isoforms.fasta.no5merge.collapsed.gff	exon	42718405	42718505	.	-	.	gene_id "AF:1:42718505-42723709:42723868:42718505-42773861:42773972:-"; transcript_id "AF:1:42718505-42723709:42723868:42718505-42773861:42773972:-:alternative1";
1	hq_isoforms.fasta.no5merge.collapsed.gff	exon	42773861	42773972	.	-	.	gene_id "AF:1:42718505-42723709:42723868:42718505-42773861:42773972:-"; transcript_id "AF:1:42718505-42723709:42723868:42718505-42773861:42773972:-:alternative1";
1	hq_isoforms.fasta.no5merge.collapsed.gff	exon	42718405	42718505	.	-	.	gene_id "AF:1:42718505-42723709:42723868:42718505-42773861:42773987:-"; transcript_id "AF:1:42718505-42723709:42723868:42718505-42773861:42773987:-:alternative2";
1	hq_isoforms.fasta.no5merge.collapsed.gff	exon	42723709	42723868	.	-	.	gene_id "AF:1:42718505-42723709:42723868:42718505-42773861:42773987:-"; transcript_id "AF:1:42718505-42723709:42723868:42718505-42773861:42773987:-:alternative2";
1	hq_isoforms.fasta.no5merge.collapsed.gff	exon	42718405	42718505	.	-	.	gene_id "AF:1:42718505-42723709:42723868:42718505-42773861:42773987:-"; transcript_id "AF:1:42718505-42723709:42723868:42718505-42773861:42773987:-:alternative1";
1	hq_isoforms.fasta.no5merge.collapsed.gff	exon	42773861	42773987	.	-	.	gene_id "AF:1:42718505-42723709:42723868:42718505-42773861:42773987:-"; transcript_id "AF:1:42718505-42723709:42723868:42718505-42773861:42773987:-:alternative1";
1	hq_isoforms.fasta.no5merge.collapsed.gff	exon	42718405	42718505	.	-	.	gene_id "AF:1:42718505-42723709:42723868:42718505-42773861:42773995:-"; transcript_id "AF:1:42718505-42723709:42723868:42718505-42773861:42773995:-:alternative2";
1	hq_isoforms.fasta.no5merge.collapsed.gff	exon	42723709	42723868	.	-	.	gene_id "AF:1:42718505-42723709:42723868:42718505-42773861:42773995:-"; transcript_id "AF:1:42718505-42723709:42723868:42718505-42773861:42773995:-:alternative2";
1	hq_isoforms.fasta.no5merge.collapsed.gff	exon	42718405	42718505	.	-	.	gene_id "AF:1:42718505-42723709:42723868:42718505-42773861:42773995:-"; transcript_id "AF:1:42718505-42723709:42723868:42718505-42773861:42773995:-:alternative1";
1	hq_isoforms.fasta.no5merge.collapsed.gff	exon	42773861	42773995	.	-	.	gene_id "AF:1:42718505-42723709:42723868:42718505-42773861:42773995:-"; transcript_id "AF:1:42718505-42723709:42723868:42718505-42773861:42773995:-:alternative1";
1	hq_isoforms.fasta.no5merge.collapsed.gff	exon	42718405	42718505	.	-	.	gene_id "AF:1:42718505-42723709:42723868:42718505-42753743:42754110:-"; transcript_id "AF:1:42718505-42723709:42723868:42718505-42753743:42754110:-:alternative2";
1	hq_isoforms.fasta.no5merge.collapsed.gff	exon	42723709	42723868	.	-	.	gene_id "AF:1:42718505-42723709:42723868:42718505-42753743:42754110:-"; transcript_id "AF:1:42718505-42723709:42723868:42718505-42753743:42754110:-:alternative2";
1	hq_isoforms.fasta.no5merge.collapsed.gff	exon	42718405	42718505	.	-	.	gene_id "AF:1:42718505-42723709:42723868:42718505-42753743:42754110:-"; transcript_id "AF:1:42718505-42723709:42723868:42718505-42753743:42754110:-:alternative1";
1	hq_isoforms.fasta.no5merge.collapsed.gff	exon	42753743	42754110	.	-	.	gene_id "AF:1:42718505-42723709:42723868:42718505-42753743:42754110:-"; transcript_id "AF:1:42718505-42723709:42723868:42718505-42753743:42754110:-:alternative1";
1	hq_isoforms.fasta.no5merge.collapsed.gff	exon	42718405	42718505	.	-	.	gene_id "AF:1:42718505-42753743:42754110:42718505-42773861:42773955:-"; transcript_id "AF:1:42718505-42753743:42754110:42718505-42773861:42773955:-:alternative2";
1	hq_isoforms.fasta.no5merge.collapsed.gff	exon	42753743	42754110	.	-	.	gene_id "AF:1:42718505-42753743:42754110:42718505-42773861:42773955:-"; transcript_id "AF:1:42718505-42753743:42754110:42718505-42773861:42773955:-:alternative2";
1	hq_isoforms.fasta.no5merge.collapsed.gff	exon	42718405	42718505	.	-	.	gene_id "AF:1:42718505-42753743:42754110:42718505-42773861:42773955:-"; transcript_id "AF:1:42718505-42753743:42754110:42718505-42773861:42773955:-:alternative1";
1	hq_isoforms.fasta.no5merge.collapsed.gff	exon	42773861	42773955	.	-	.	gene_id "AF:1:42718505-42753743:42754110:42718505-42773861:42773955:-"; transcript_id "AF:1:42718505-42753743:42754110:42718505-42773861:42773955:-:alternative1";
1	hq_isoforms.fasta.no5merge.collapsed.gff	exon	42718405	42718505	.	-	.	gene_id "AF:1:42718505-42753743:42754110:42718505-42773861:42773968:-"; transcript_id "AF:1:42718505-42753743:42754110:42718505-42773861:42773968:-:alternative2";
1	hq_isoforms.fasta.no5merge.collapsed.gff	exon	42753743	42754110	.	-	.	gene_id "AF:1:42718505-42753743:42754110:42718505-42773861:42773968:-"; transcript_id "AF:1:42718505-42753743:42754110:42718505-42773861:42773968:-:alternative2";
1	hq_isoforms.fasta.no5merge.collapsed.gff	exon	42718405	42718505	.	-	.	gene_id "AF:1:42718505-42753743:42754110:42718505-42773861:42773968:-"; transcript_id "AF:1:42718505-42753743:42754110:42718505-42773861:42773968:-:alternative1";
1	hq_isoforms.fasta.no5merge.collapsed.gff	exon	42773861	42773968	.	-	.	gene_id "AF:1:42718505-42753743:42754110:42718505-42773861:42773968:-"; transcript_id "AF:1:42718505-42753743:42754110:42718505-42773861:42773968:-:alternative1";
1	hq_isoforms.fasta.no5merge.collapsed.gff	exon	42718405	42718505	.	-	.	gene_id "AF:1:42718505-42753743:42754110:42718505-42773861:42773997:-"; transcript_id "AF:1:42718505-42753743:42754110:42718505-42773861:42773997:-:alternative2";
1	hq_isoforms.fasta.no5merge.collapsed.gff	exon	42753743	42754110	.	-	.	gene_id "AF:1:42718505-42753743:42754110:42718505-42773861:42773997:-"; transcript_id "AF:1:42718505-42753743:42754110:42718505-42773861:42773997:-:alternative2";
1	hq_isoforms.fasta.no5merge.collapsed.gff	exon	42718405	42718505	.	-	.	gene_id "AF:1:42718505-42753743:42754110:42718505-42773861:42773997:-"; transcript_id "AF:1:42718505-42753743:42754110:42718505-42773861:42773997:-:alternative1";
1	hq_isoforms.fasta.no5merge.collapsed.gff	exon	42773861	42773997	.	-	.	gene_id "AF:1:42718505-42753743:42754110:42718505-42773861:42773997:-"; transcript_id "AF:1:42718505-42753743:42754110:42718505-42773861:42773997:-:alternative1";
1	hq_isoforms.fasta.no5merge.collapsed.gff	exon	42718405	42718505	.	-	.	gene_id "AF:1:42718505-42753743:42754110:42718505-42773861:42773972:-"; transcript_id "AF:1:42718505-42753743:42754110:42718505-42773861:42773972:-:alternative2";
1	hq_isoforms.fasta.no5merge.collapsed.gff	exon	42753743	42754110	.	-	.	gene_id "AF:1:42718505-42753743:42754110:42718505-42773861:42773972:-"; transcript_id "AF:1:42718505-42753743:42754110:42718505-42773861:42773972:-:alternative2";
1	hq_isoforms.fasta.no5merge.collapsed.gff	exon	42718405	42718505	.	-	.	gene_id "AF:1:42718505-42753743:42754110:42718505-42773861:42773972:-"; transcript_id "AF:1:42718505-42753743:42754110:42718505-42773861:42773972:-:alternative1";
1	hq_isoforms.fasta.no5merge.collapsed.gff	exon	42773861	42773972	.	-	.	gene_id "AF:1:42718505-42753743:42754110:42718505-42773861:42773972:-"; transcript_id "AF:1:42718505-42753743:42754110:42718505-42773861:42773972:-:alternative1";
1	hq_isoforms.fasta.no5merge.collapsed.gff	exon	42718405	42718505	.	-	.	gene_id "AF:1:42718505-42753743:42754110:42718505-42773861:42773987:-"; transcript_id "AF:1:42718505-42753743:42754110:42718505-42773861:42773987:-:alternative2";
1	hq_isoforms.fasta.no5merge.collapsed.gff	exon	42753743	42754110	.	-	.	gene_id "AF:1:42718505-42753743:42754110:42718505-42773861:42773987:-"; transcript_id "AF:1:42718505-42753743:42754110:42718505-42773861:42773987:-:alternative2";
1	hq_isoforms.fasta.no5merge.collapsed.gff	exon	42718405	42718505	.	-	.	gene_id "AF:1:42718505-42753743:42754110:42718505-42773861:42773987:-"; transcript_id "AF:1:42718505-42753743:42754110:42718505-42773861:42773987:-:alternative1";
1	hq_isoforms.fasta.no5merge.collapsed.gff	exon	42773861	42773987	.	-	.	gene_id "AF:1:42718505-42753743:42754110:42718505-42773861:42773987:-"; transcript_id "AF:1:42718505-42753743:42754110:42718505-42773861:42773987:-:alternative1";
1	hq_isoforms.fasta.no5merge.collapsed.gff	exon	42718405	42718505	.	-	.	gene_id "AF:1:42718505-42753743:42754110:42718505-42773861:42773995:-"; transcript_id "AF:1:42718505-42753743:42754110:42718505-42773861:42773995:-:alternative2";
1	hq_isoforms.fasta.no5merge.collapsed.gff	exon	42753743	42754110	.	-	.	gene_id "AF:1:42718505-42753743:42754110:42718505-42773861:42773995:-"; transcript_id "AF:1:42718505-42753743:42754110:42718505-42773861:42773995:-:alternative2";
1	hq_isoforms.fasta.no5merge.collapsed.gff	exon	42718405	42718505	.	-	.	gene_id "AF:1:42718505-42753743:42754110:42718505-42773861:42773995:-"; transcript_id "AF:1:42718505-42753743:42754110:42718505-42773861:42773995:-:alternative1";
1	hq_isoforms.fasta.no5merge.collapsed.gff	exon	42773861	42773995	.	-	.	gene_id "AF:1:42718505-42753743:42754110:42718505-42773861:42773995:-"; transcript_id "AF:1:42718505-42753743:42754110:42718505-42773861:42773995:-:alternative1";
1	hq_isoforms.fasta.no5merge.collapsed.gff	exon	45522250	45522350	.	-	.	gene_id "AF:1:45522350-45522888:45522974:45522350-45523067:45523194:-"; transcript_id "AF:1:45522350-45522888:45522974:45522350-45523067:45523194:-:alternative2";
1	hq_isoforms.fasta.no5merge.collapsed.gff	exon	45522888	45522974	.	-	.	gene_id "AF:1:45522350-45522888:45522974:45522350-45523067:45523194:-"; transcript_id "AF:1:45522350-45522888:45522974:45522350-45523067:45523194:-:alternative2";
1	hq_isoforms.fasta.no5merge.collapsed.gff	exon	45522250	45522350	.	-	.	gene_id "AF:1:45522350-45522888:45522974:45522350-45523067:45523194:-"; transcript_id "AF:1:45522350-45522888:45522974:45522350-45523067:45523194:-:alternative1";
1	hq_isoforms.fasta.no5merge.collapsed.gff	exon	45523067	45523194	.	-	.	gene_id "AF:1:45522350-45522888:45522974:45522350-45523067:45523194:-"; transcript_id "AF:1:45522350-45522888:45522974:45522350-45523067:45523194:-:alternative1";
1	hq_isoforms.fasta.no5merge.collapsed.gff	exon	45522250	45522350	.	-	.	gene_id "AF:1:45522350-45522888:45522970:45522350-45523067:45523194:-"; transcript_id "AF:1:45522350-45522888:45522970:45522350-45523067:45523194:-:alternative2";
1	hq_isoforms.fasta.no5merge.collapsed.gff	exon	45522888	45522970	.	-	.	gene_id "AF:1:45522350-45522888:45522970:45522350-45523067:45523194:-"; transcript_id "AF:1:45522350-45522888:45522970:45522350-45523067:45523194:-:alternative2";
1	hq_isoforms.fasta.no5merge.collapsed.gff	exon	45522250	45522350	.	-	.	gene_id "AF:1:45522350-45522888:45522970:45522350-45523067:45523194:-"; transcript_id "AF:1:45522350-45522888:45522970:45522350-45523067:45523194:-:alternative1";
1	hq_isoforms.fasta.no5merge.collapsed.gff	exon	45523067	45523194	.	-	.	gene_id "AF:1:45522350-45522888:45522970:45522350-45523067:45523194:-"; transcript_id "AF:1:45522350-45522888:45522970:45522350-45523067:45523194:-:alternative1";
1	hq_isoforms.fasta.no5merge.collapsed.gff	exon	45522250	45522350	.	-	.	gene_id "AF:1:45522350-45522888:45522970:45522350-45522973:45523189:-"; transcript_id "AF:1:45522350-45522888:45522970:45522350-45522973:45523189:-:alternative2";
1	hq_isoforms.fasta.no5merge.collapsed.gff	exon	45522888	45522970	.	-	.	gene_id "AF:1:45522350-45522888:45522970:45522350-45522973:45523189:-"; transcript_id "AF:1:45522350-45522888:45522970:45522350-45522973:45523189:-:alternative2";
1	hq_isoforms.fasta.no5merge.collapsed.gff	exon	45522250	45522350	.	-	.	gene_id "AF:1:45522350-45522888:45522970:45522350-45522973:45523189:-"; transcript_id "AF:1:45522350-45522888:45522970:45522350-45522973:45523189:-:alternative1";
1	hq_isoforms.fasta.no5merge.collapsed.gff	exon	45522973	45523189	.	-	.	gene_id "AF:1:45522350-45522888:45522970:45522350-45522973:45523189:-"; transcript_id "AF:1:45522350-45522888:45522970:45522350-45522973:45523189:-:alternative1";
1	hq_isoforms.fasta.no5merge.collapsed.gff	exon	45522250	45522350	.	-	.	gene_id "AF:1:45522350-45522888:45522970:45522350-45522973:45523176:-"; transcript_id "AF:1:45522350-45522888:45522970:45522350-45522973:45523176:-:alternative2";
1	hq_isoforms.fasta.no5merge.collapsed.gff	exon	45522888	45522970	.	-	.	gene_id "AF:1:45522350-45522888:45522970:45522350-45522973:45523176:-"; transcript_id "AF:1:45522350-45522888:45522970:45522350-45522973:45523176:-:alternative2";
1	hq_isoforms.fasta.no5merge.collapsed.gff	exon	45522250	45522350	.	-	.	gene_id "AF:1:45522350-45522888:45522970:45522350-45522973:45523176:-"; transcript_id "AF:1:45522350-45522888:45522970:45522350-45522973:45523176:-:alternative1";
1	hq_isoforms.fasta.no5merge.collapsed.gff	exon	45522973	45523176	.	-	.	gene_id "AF:1:45522350-45522888:45522970:45522350-45522973:45523176:-"; transcript_id "AF:1:45522350-45522888:45522970:45522350-45522973:45523176:-:alternative1";
1	hq_isoforms.fasta.no5merge.collapsed.gff	exon	45522250	45522350	.	-	.	gene_id "AF:1:45522350-45522888:45522970:45522350-45522973:45523097:-"; transcript_id "AF:1:45522350-45522888:45522970:45522350-45522973:45523097:-:alternative2";
1	hq_isoforms.fasta.no5merge.collapsed.gff	exon	45522888	45522970	.	-	.	gene_id "AF:1:45522350-45522888:45522970:45522350-45522973:45523097:-"; transcript_id "AF:1:45522350-45522888:45522970:45522350-45522973:45523097:-:alternative2";
1	hq_isoforms.fasta.no5merge.collapsed.gff	exon	45522250	45522350	.	-	.	gene_id "AF:1:45522350-45522888:45522970:45522350-45522973:45523097:-"; transcript_id "AF:1:45522350-45522888:45522970:45522350-45522973:45523097:-:alternative1";
1	hq_isoforms.fasta.no5merge.collapsed.gff	exon	45522973	45523097	.	-	.	gene_id "AF:1:45522350-45522888:45522970:45522350-45522973:45523097:-"; transcript_id "AF:1:45522350-45522888:45522970:45522350-45522973:45523097:-:alternative1";
1	hq_isoforms.fasta.no5merge.collapsed.gff	exon	45522250	45522350	.	-	.	gene_id "AF:1:45522350-45522691:45522817:45522350-45523067:45523194:-"; transcript_id "AF:1:45522350-45522691:45522817:45522350-45523067:45523194:-:alternative2";
1	hq_isoforms.fasta.no5merge.collapsed.gff	exon	45522691	45522817	.	-	.	gene_id "AF:1:45522350-45522691:45522817:45522350-45523067:45523194:-"; transcript_id "AF:1:45522350-45522691:45522817:45522350-45523067:45523194:-:alternative2";
1	hq_isoforms.fasta.no5merge.collapsed.gff	exon	45522250	45522350	.	-	.	gene_id "AF:1:45522350-45522691:45522817:45522350-45523067:45523194:-"; transcript_id "AF:1:45522350-45522691:45522817:45522350-45523067:45523194:-:alternative1";
1	hq_isoforms.fasta.no5merge.collapsed.gff	exon	45523067	45523194	.	-	.	gene_id "AF:1:45522350-45522691:45522817:45522350-45523067:45523194:-"; transcript_id "AF:1:45522350-45522691:45522817:45522350-45523067:45523194:-:alternative1";
1	hq_isoforms.fasta.no5merge.collapsed.gff	exon	45522250	45522350	.	-	.	gene_id "AF:1:45522350-45522691:45522817:45522350-45522973:45523189:-"; transcript_id "AF:1:45522350-45522691:45522817:45522350-45522973:45523189:-:alternative2";
1	hq_isoforms.fasta.no5merge.collapsed.gff	exon	45522691	45522817	.	-	.	gene_id "AF:1:45522350-45522691:45522817:45522350-45522973:45523189:-"; transcript_id "AF:1:45522350-45522691:45522817:45522350-45522973:45523189:-:alternative2";
1	hq_isoforms.fasta.no5merge.collapsed.gff	exon	45522250	45522350	.	-	.	gene_id "AF:1:45522350-45522691:45522817:45522350-45522973:45523189:-"; transcript_id "AF:1:45522350-45522691:45522817:45522350-45522973:45523189:-:alternative1";
1	hq_isoforms.fasta.no5merge.collapsed.gff	exon	45522973	45523189	.	-	.	gene_id "AF:1:45522350-45522691:45522817:45522350-45522973:45523189:-"; transcript_id "AF:1:45522350-45522691:45522817:45522350-45522973:45523189:-:alternative1";
1	hq_isoforms.fasta.no5merge.collapsed.gff	exon	45522250	45522350	.	-	.	gene_id "AF:1:45522350-45522691:45522817:45522350-45522888:45522974:-"; transcript_id "AF:1:45522350-45522691:45522817:45522350-45522888:45522974:-:alternative2";
1	hq_isoforms.fasta.no5merge.collapsed.gff	exon	45522691	45522817	.	-	.	gene_id "AF:1:45522350-45522691:45522817:45522350-45522888:45522974:-"; transcript_id "AF:1:45522350-45522691:45522817:45522350-45522888:45522974:-:alternative2";
1	hq_isoforms.fasta.no5merge.collapsed.gff	exon	45522250	45522350	.	-	.	gene_id "AF:1:45522350-45522691:45522817:45522350-45522888:45522974:-"; transcript_id "AF:1:45522350-45522691:45522817:45522350-45522888:45522974:-:alternative1";
1	hq_isoforms.fasta.no5merge.collapsed.gff	exon	45522888	45522974	.	-	.	gene_id "AF:1:45522350-45522691:45522817:45522350-45522888:45522974:-"; transcript_id "AF:1:45522350-45522691:45522817:45522350-45522888:45522974:-:alternative1";
1	hq_isoforms.fasta.no5merge.collapsed.gff	exon	45522250	45522350	.	-	.	gene_id "AF:1:45522350-45522691:45522817:45522350-45522973:45523176:-"; transcript_id "AF:1:45522350-45522691:45522817:45522350-45522973:45523176:-:alternative2";
1	hq_isoforms.fasta.no5merge.collapsed.gff	exon	45522691	45522817	.	-	.	gene_id "AF:1:45522350-45522691:45522817:45522350-45522973:45523176:-"; transcript_id "AF:1:45522350-45522691:45522817:45522350-45522973:45523176:-:alternative2";
1	hq_isoforms.fasta.no5merge.collapsed.gff	exon	45522250	45522350	.	-	.	gene_id "AF:1:45522350-45522691:45522817:45522350-45522973:45523176:-"; transcript_id "AF:1:45522350-45522691:45522817:45522350-45522973:45523176:-:alternative1";
1	hq_isoforms.fasta.no5merge.collapsed.gff	exon	45522973	45523176	.	-	.	gene_id "AF:1:45522350-45522691:45522817:45522350-45522973:45523176:-"; transcript_id "AF:1:45522350-45522691:45522817:45522350-45522973:45523176:-:alternative1";
1	hq_isoforms.fasta.no5merge.collapsed.gff	exon	45522250	45522350	.	-	.	gene_id "AF:1:45522350-45522691:45522817:45522350-45522888:45522970:-"; transcript_id "AF:1:45522350-45522691:45522817:45522350-45522888:45522970:-:alternative2";
1	hq_isoforms.fasta.no5merge.collapsed.gff	exon	45522691	45522817	.	-	.	gene_id "AF:1:45522350-45522691:45522817:45522350-45522888:45522970:-"; transcript_id "AF:1:45522350-45522691:45522817:45522350-45522888:45522970:-:alternative2";
1	hq_isoforms.fasta.no5merge.collapsed.gff	exon	45522250	45522350	.	-	.	gene_id "AF:1:45522350-45522691:45522817:45522350-45522888:45522970:-"; transcript_id "AF:1:45522350-45522691:45522817:45522350-45522888:45522970:-:alternative1";
1	hq_isoforms.fasta.no5merge.collapsed.gff	exon	45522888	45522970	.	-	.	gene_id "AF:1:45522350-45522691:45522817:45522350-45522888:45522970:-"; transcript_id "AF:1:45522350-45522691:45522817:45522350-45522888:45522970:-:alternative1";
1	hq_isoforms.fasta.no5merge.collapsed.gff	exon	45522250	45522350	.	-	.	gene_id "AF:1:45522350-45522691:45522817:45522350-45522973:45523097:-"; transcript_id "AF:1:45522350-45522691:45522817:45522350-45522973:45523097:-:alternative2";
1	hq_isoforms.fasta.no5merge.collapsed.gff	exon	45522691	45522817	.	-	.	gene_id "AF:1:45522350-45522691:45522817:45522350-45522973:45523097:-"; transcript_id "AF:1:45522350-45522691:45522817:45522350-45522973:45523097:-:alternative2";
1	hq_isoforms.fasta.no5merge.collapsed.gff	exon	45522250	45522350	.	-	.	gene_id "AF:1:45522350-45522691:45522817:45522350-45522973:45523097:-"; transcript_id "AF:1:45522350-45522691:45522817:45522350-45522973:45523097:-:alternative1";
1	hq_isoforms.fasta.no5merge.collapsed.gff	exon	45522973	45523097	.	-	.	gene_id "AF:1:45522350-45522691:45522817:45522350-45522973:45523097:-"; transcript_id "AF:1:45522350-45522691:45522817:45522350-45522973:45523097:-:alternative1";
1	hq_isoforms.fasta.no5merge.collapsed.gff	exon	46677176	46677276	.	-	.	gene_id "AF:1:46677276-46678773:46680090:46677276-46680186:46680294:-"; transcript_id "AF:1:46677276-46678773:46680090:46677276-46680186:46680294:-:alternative2";
1	hq_isoforms.fasta.no5merge.collapsed.gff	exon	46678773	46680090	.	-	.	gene_id "AF:1:46677276-46678773:46680090:46677276-46680186:46680294:-"; transcript_id "AF:1:46677276-46678773:46680090:46677276-46680186:46680294:-:alternative2";
1	hq_isoforms.fasta.no5merge.collapsed.gff	exon	46677176	46677276	.	-	.	gene_id "AF:1:46677276-46678773:46680090:46677276-46680186:46680294:-"; transcript_id "AF:1:46677276-46678773:46680090:46677276-46680186:46680294:-:alternative1";
1	hq_isoforms.fasta.no5merge.collapsed.gff	exon	46680186	46680294	.	-	.	gene_id "AF:1:46677276-46678773:46680090:46677276-46680186:46680294:-"; transcript_id "AF:1:46677276-46678773:46680090:46677276-46680186:46680294:-:alternative1";
1	hq_isoforms.fasta.no5merge.collapsed.gff	exon	46677176	46677276	.	-	.	gene_id "AF:1:46677276-46678773:46680090:46677276-46680186:46680360:-"; transcript_id "AF:1:46677276-46678773:46680090:46677276-46680186:46680360:-:alternative2";
1	hq_isoforms.fasta.no5merge.collapsed.gff	exon	46678773	46680090	.	-	.	gene_id "AF:1:46677276-46678773:46680090:46677276-46680186:46680360:-"; transcript_id "AF:1:46677276-46678773:46680090:46677276-46680186:46680360:-:alternative2";
1	hq_isoforms.fasta.no5merge.collapsed.gff	exon	46677176	46677276	.	-	.	gene_id "AF:1:46677276-46678773:46680090:46677276-46680186:46680360:-"; transcript_id "AF:1:46677276-46678773:46680090:46677276-46680186:46680360:-:alternative1";
1	hq_isoforms.fasta.no5merge.collapsed.gff	exon	46680186	46680360	.	-	.	gene_id "AF:1:46677276-46678773:46680090:46677276-46680186:46680360:-"; transcript_id "AF:1:46677276-46678773:46680090:46677276-46680186:46680360:-:alternative1";
1	hq_isoforms.fasta.no5merge.collapsed.gff	exon	46677176	46677276	.	-	.	gene_id "AF:1:46677276-46678773:46680090:46677276-46680186:46680270:-"; transcript_id "AF:1:46677276-46678773:46680090:46677276-46680186:46680270:-:alternative2";
1	hq_isoforms.fasta.no5merge.collapsed.gff	exon	46678773	46680090	.	-	.	gene_id "AF:1:46677276-46678773:46680090:46677276-46680186:46680270:-"; transcript_id "AF:1:46677276-46678773:46680090:46677276-46680186:46680270:-:alternative2";
1	hq_isoforms.fasta.no5merge.collapsed.gff	exon	46677176	46677276	.	-	.	gene_id "AF:1:46677276-46678773:46680090:46677276-46680186:46680270:-"; transcript_id "AF:1:46677276-46678773:46680090:46677276-46680186:46680270:-:alternative1";
1	hq_isoforms.fasta.no5merge.collapsed.gff	exon	46680186	46680270	.	-	.	gene_id "AF:1:46677276-46678773:46680090:46677276-46680186:46680270:-"; transcript_id "AF:1:46677276-46678773:46680090:46677276-46680186:46680270:-:alternative1";
1	hq_isoforms.fasta.no5merge.collapsed.gff	exon	52358998	52359098	.	-	.	gene_id "AF:1:52359098-52367251:52367414:52359098-52387725:52387896:-"; transcript_id "AF:1:52359098-52367251:52367414:52359098-52387725:52387896:-:alternative2";
1	hq_isoforms.fasta.no5merge.collapsed.gff	exon	52367251	52367414	.	-	.	gene_id "AF:1:52359098-52367251:52367414:52359098-52387725:52387896:-"; transcript_id "AF:1:52359098-52367251:52367414:52359098-52387725:52387896:-:alternative2";
1	hq_isoforms.fasta.no5merge.collapsed.gff	exon	52358998	52359098	.	-	.	gene_id "AF:1:52359098-52367251:52367414:52359098-52387725:52387896:-"; transcript_id "AF:1:52359098-52367251:52367414:52359098-52387725:52387896:-:alternative1";
1	hq_isoforms.fasta.no5merge.collapsed.gff	exon	52387725	52387896	.	-	.	gene_id "AF:1:52359098-52367251:52367414:52359098-52387725:52387896:-"; transcript_id "AF:1:52359098-52367251:52367414:52359098-52387725:52387896:-:alternative1";
1	hq_isoforms.fasta.no5merge.collapsed.gff	exon	52358998	52359098	.	-	.	gene_id "AF:1:52359098-52367251:52367414:52359098-52387725:52387888:-"; transcript_id "AF:1:52359098-52367251:52367414:52359098-52387725:52387888:-:alternative2";
1	hq_isoforms.fasta.no5merge.collapsed.gff	exon	52367251	52367414	.	-	.	gene_id "AF:1:52359098-52367251:52367414:52359098-52387725:52387888:-"; transcript_id "AF:1:52359098-52367251:52367414:52359098-52387725:52387888:-:alternative2";
1	hq_isoforms.fasta.no5merge.collapsed.gff	exon	52358998	52359098	.	-	.	gene_id "AF:1:52359098-52367251:52367414:52359098-52387725:52387888:-"; transcript_id "AF:1:52359098-52367251:52367414:52359098-52387725:52387888:-:alternative1";
1	hq_isoforms.fasta.no5merge.collapsed.gff	exon	52387725	52387888	.	-	.	gene_id "AF:1:52359098-52367251:52367414:52359098-52387725:52387888:-"; transcript_id "AF:1:52359098-52367251:52367414:52359098-52387725:52387888:-:alternative1";
1	hq_isoforms.fasta.no5merge.collapsed.gff	exon	52094648	52094748	.	-	.	gene_id "AF:1:52094748-52095035:52095288:52094748-52096268:52096338:-"; transcript_id "AF:1:52094748-52095035:52095288:52094748-52096268:52096338:-:alternative2";
1	hq_isoforms.fasta.no5merge.collapsed.gff	exon	52095035	52095288	.	-	.	gene_id "AF:1:52094748-52095035:52095288:52094748-52096268:52096338:-"; transcript_id "AF:1:52094748-52095035:52095288:52094748-52096268:52096338:-:alternative2";
1	hq_isoforms.fasta.no5merge.collapsed.gff	exon	52094648	52094748	.	-	.	gene_id "AF:1:52094748-52095035:52095288:52094748-52096268:52096338:-"; transcript_id "AF:1:52094748-52095035:52095288:52094748-52096268:52096338:-:alternative1";
1	hq_isoforms.fasta.no5merge.collapsed.gff	exon	52096268	52096338	.	-	.	gene_id "AF:1:52094748-52095035:52095288:52094748-52096268:52096338:-"; transcript_id "AF:1:52094748-52095035:52095288:52094748-52096268:52096338:-:alternative1";
1	hq_isoforms.fasta.no5merge.collapsed.gff	exon	52094648	52094748	.	-	.	gene_id "AF:1:52094748-52095035:52095288:52094748-52096268:52096359:-"; transcript_id "AF:1:52094748-52095035:52095288:52094748-52096268:52096359:-:alternative2";
1	hq_isoforms.fasta.no5merge.collapsed.gff	exon	52095035	52095288	.	-	.	gene_id "AF:1:52094748-52095035:52095288:52094748-52096268:52096359:-"; transcript_id "AF:1:52094748-52095035:52095288:52094748-52096268:52096359:-:alternative2";
1	hq_isoforms.fasta.no5merge.collapsed.gff	exon	52094648	52094748	.	-	.	gene_id "AF:1:52094748-52095035:52095288:52094748-52096268:52096359:-"; transcript_id "AF:1:52094748-52095035:52095288:52094748-52096268:52096359:-:alternative1";
1	hq_isoforms.fasta.no5merge.collapsed.gff	exon	52096268	52096359	.	-	.	gene_id "AF:1:52094748-52095035:52095288:52094748-52096268:52096359:-"; transcript_id "AF:1:52094748-52095035:52095288:52094748-52096268:52096359:-:alternative1";
1	hq_isoforms.fasta.no5merge.collapsed.gff	exon	52336399	52336499	.	-	.	gene_id "AF:1:52336499-52340740:52340814:52336499-52341835:52342423:-"; transcript_id "AF:1:52336499-52340740:52340814:52336499-52341835:52342423:-:alternative2";
1	hq_isoforms.fasta.no5merge.collapsed.gff	exon	52340740	52340814	.	-	.	gene_id "AF:1:52336499-52340740:52340814:52336499-52341835:52342423:-"; transcript_id "AF:1:52336499-52340740:52340814:52336499-52341835:52342423:-:alternative2";
1	hq_isoforms.fasta.no5merge.collapsed.gff	exon	52336399	52336499	.	-	.	gene_id "AF:1:52336499-52340740:52340814:52336499-52341835:52342423:-"; transcript_id "AF:1:52336499-52340740:52340814:52336499-52341835:52342423:-:alternative1";
1	hq_isoforms.fasta.no5merge.collapsed.gff	exon	52341835	52342423	.	-	.	gene_id "AF:1:52336499-52340740:52340814:52336499-52341835:52342423:-"; transcript_id "AF:1:52336499-52340740:52340814:52336499-52341835:52342423:-:alternative1";
1	hq_isoforms.fasta.no5merge.collapsed.gff	exon	52358998	52359098	.	-	.	gene_id "AF:1:52359098-52367251:52367371:52359098-52387725:52387896:-"; transcript_id "AF:1:52359098-52367251:52367371:52359098-52387725:52387896:-:alternative2";
1	hq_isoforms.fasta.no5merge.collapsed.gff	exon	52367251	52367371	.	-	.	gene_id "AF:1:52359098-52367251:52367371:52359098-52387725:52387896:-"; transcript_id "AF:1:52359098-52367251:52367371:52359098-52387725:52387896:-:alternative2";
1	hq_isoforms.fasta.no5merge.collapsed.gff	exon	52358998	52359098	.	-	.	gene_id "AF:1:52359098-52367251:52367371:52359098-52387725:52387896:-"; transcript_id "AF:1:52359098-52367251:52367371:52359098-52387725:52387896:-:alternative1";
1	hq_isoforms.fasta.no5merge.collapsed.gff	exon	52387725	52387896	.	-	.	gene_id "AF:1:52359098-52367251:52367371:52359098-52387725:52387896:-"; transcript_id "AF:1:52359098-52367251:52367371:52359098-52387725:52387896:-:alternative1";
1	hq_isoforms.fasta.no5merge.collapsed.gff	exon	52358998	52359098	.	-	.	gene_id "AF:1:52359098-52367251:52367371:52359098-52387725:52387888:-"; transcript_id "AF:1:52359098-52367251:52367371:52359098-52387725:52387888:-:alternative2";
1	hq_isoforms.fasta.no5merge.collapsed.gff	exon	52367251	52367371	.	-	.	gene_id "AF:1:52359098-52367251:52367371:52359098-52387725:52387888:-"; transcript_id "AF:1:52359098-52367251:52367371:52359098-52387725:52387888:-:alternative2";
1	hq_isoforms.fasta.no5merge.collapsed.gff	exon	52358998	52359098	.	-	.	gene_id "AF:1:52359098-52367251:52367371:52359098-52387725:52387888:-"; transcript_id "AF:1:52359098-52367251:52367371:52359098-52387725:52387888:-:alternative1";
1	hq_isoforms.fasta.no5merge.collapsed.gff	exon	52387725	52387888	.	-	.	gene_id "AF:1:52359098-52367251:52367371:52359098-52387725:52387888:-"; transcript_id "AF:1:52359098-52367251:52367371:52359098-52387725:52387888:-:alternative1";
1	hq_isoforms.fasta.no5merge.collapsed.gff	exon	52358998	52359098	.	-	.	gene_id "AF:1:52359098-52367251:52367385:52359098-52387725:52387896:-"; transcript_id "AF:1:52359098-52367251:52367385:52359098-52387725:52387896:-:alternative2";
1	hq_isoforms.fasta.no5merge.collapsed.gff	exon	52367251	52367385	.	-	.	gene_id "AF:1:52359098-52367251:52367385:52359098-52387725:52387896:-"; transcript_id "AF:1:52359098-52367251:52367385:52359098-52387725:52387896:-:alternative2";
1	hq_isoforms.fasta.no5merge.collapsed.gff	exon	52358998	52359098	.	-	.	gene_id "AF:1:52359098-52367251:52367385:52359098-52387725:52387896:-"; transcript_id "AF:1:52359098-52367251:52367385:52359098-52387725:52387896:-:alternative1";
1	hq_isoforms.fasta.no5merge.collapsed.gff	exon	52387725	52387896	.	-	.	gene_id "AF:1:52359098-52367251:52367385:52359098-52387725:52387896:-"; transcript_id "AF:1:52359098-52367251:52367385:52359098-52387725:52387896:-:alternative1";
1	hq_isoforms.fasta.no5merge.collapsed.gff	exon	52358998	52359098	.	-	.	gene_id "AF:1:52359098-52367251:52367385:52359098-52387725:52387888:-"; transcript_id "AF:1:52359098-52367251:52367385:52359098-52387725:52387888:-:alternative2";
1	hq_isoforms.fasta.no5merge.collapsed.gff	exon	52367251	52367385	.	-	.	gene_id "AF:1:52359098-52367251:52367385:52359098-52387725:52387888:-"; transcript_id "AF:1:52359098-52367251:52367385:52359098-52387725:52387888:-:alternative2";
1	hq_isoforms.fasta.no5merge.collapsed.gff	exon	52358998	52359098	.	-	.	gene_id "AF:1:52359098-52367251:52367385:52359098-52387725:52387888:-"; transcript_id "AF:1:52359098-52367251:52367385:52359098-52387725:52387888:-:alternative1";
1	hq_isoforms.fasta.no5merge.collapsed.gff	exon	52387725	52387888	.	-	.	gene_id "AF:1:52359098-52367251:52367385:52359098-52387725:52387888:-"; transcript_id "AF:1:52359098-52367251:52367385:52359098-52387725:52387888:-:alternative1";
1	hq_isoforms.fasta.no5merge.collapsed.gff	exon	53433133	53433233	.	-	.	gene_id "AF:1:53433233-53433792:53434068:53433233-53435858:53435960:-"; transcript_id "AF:1:53433233-53433792:53434068:53433233-53435858:53435960:-:alternative2";
1	hq_isoforms.fasta.no5merge.collapsed.gff	exon	53433792	53434068	.	-	.	gene_id "AF:1:53433233-53433792:53434068:53433233-53435858:53435960:-"; transcript_id "AF:1:53433233-53433792:53434068:53433233-53435858:53435960:-:alternative2";
1	hq_isoforms.fasta.no5merge.collapsed.gff	exon	53433133	53433233	.	-	.	gene_id "AF:1:53433233-53433792:53434068:53433233-53435858:53435960:-"; transcript_id "AF:1:53433233-53433792:53434068:53433233-53435858:53435960:-:alternative1";
1	hq_isoforms.fasta.no5merge.collapsed.gff	exon	53435858	53435960	.	-	.	gene_id "AF:1:53433233-53433792:53434068:53433233-53435858:53435960:-"; transcript_id "AF:1:53433233-53433792:53434068:53433233-53435858:53435960:-:alternative1";
1	hq_isoforms.fasta.no5merge.collapsed.gff	exon	53433133	53433233	.	-	.	gene_id "AF:1:53433233-53433792:53434068:53433233-53435858:53435970:-"; transcript_id "AF:1:53433233-53433792:53434068:53433233-53435858:53435970:-:alternative2";
1	hq_isoforms.fasta.no5merge.collapsed.gff	exon	53433792	53434068	.	-	.	gene_id "AF:1:53433233-53433792:53434068:53433233-53435858:53435970:-"; transcript_id "AF:1:53433233-53433792:53434068:53433233-53435858:53435970:-:alternative2";
1	hq_isoforms.fasta.no5merge.collapsed.gff	exon	53433133	53433233	.	-	.	gene_id "AF:1:53433233-53433792:53434068:53433233-53435858:53435970:-"; transcript_id "AF:1:53433233-53433792:53434068:53433233-53435858:53435970:-:alternative1";
1	hq_isoforms.fasta.no5merge.collapsed.gff	exon	53435858	53435970	.	-	.	gene_id "AF:1:53433233-53433792:53434068:53433233-53435858:53435970:-"; transcript_id "AF:1:53433233-53433792:53434068:53433233-53435858:53435970:-:alternative1";
1	hq_isoforms.fasta.no5merge.collapsed.gff	exon	53433133	53433233	.	-	.	gene_id "AF:1:53433233-53433792:53434068:53433233-53435858:53436001:-"; transcript_id "AF:1:53433233-53433792:53434068:53433233-53435858:53436001:-:alternative2";
1	hq_isoforms.fasta.no5merge.collapsed.gff	exon	53433792	53434068	.	-	.	gene_id "AF:1:53433233-53433792:53434068:53433233-53435858:53436001:-"; transcript_id "AF:1:53433233-53433792:53434068:53433233-53435858:53436001:-:alternative2";
1	hq_isoforms.fasta.no5merge.collapsed.gff	exon	53433133	53433233	.	-	.	gene_id "AF:1:53433233-53433792:53434068:53433233-53435858:53436001:-"; transcript_id "AF:1:53433233-53433792:53434068:53433233-53435858:53436001:-:alternative1";
1	hq_isoforms.fasta.no5merge.collapsed.gff	exon	53435858	53436001	.	-	.	gene_id "AF:1:53433233-53433792:53434068:53433233-53435858:53436001:-"; transcript_id "AF:1:53433233-53433792:53434068:53433233-53435858:53436001:-:alternative1";
1	hq_isoforms.fasta.no5merge.collapsed.gff	exon	54371162	54371262	.	-	.	gene_id "AF:1:54371262-54377458:54377759:54371262-54378247:54378315:-"; transcript_id "AF:1:54371262-54377458:54377759:54371262-54378247:54378315:-:alternative2";
1	hq_isoforms.fasta.no5merge.collapsed.gff	exon	54377458	54377759	.	-	.	gene_id "AF:1:54371262-54377458:54377759:54371262-54378247:54378315:-"; transcript_id "AF:1:54371262-54377458:54377759:54371262-54378247:54378315:-:alternative2";
1	hq_isoforms.fasta.no5merge.collapsed.gff	exon	54371162	54371262	.	-	.	gene_id "AF:1:54371262-54377458:54377759:54371262-54378247:54378315:-"; transcript_id "AF:1:54371262-54377458:54377759:54371262-54378247:54378315:-:alternative1";
1	hq_isoforms.fasta.no5merge.collapsed.gff	exon	54378247	54378315	.	-	.	gene_id "AF:1:54371262-54377458:54377759:54371262-54378247:54378315:-"; transcript_id "AF:1:54371262-54377458:54377759:54371262-54378247:54378315:-:alternative1";
1	hq_isoforms.fasta.no5merge.collapsed.gff	exon	54371162	54371262	.	-	.	gene_id "AF:1:54371262-54377458:54377759:54371262-54378247:54378320:-"; transcript_id "AF:1:54371262-54377458:54377759:54371262-54378247:54378320:-:alternative2";
1	hq_isoforms.fasta.no5merge.collapsed.gff	exon	54377458	54377759	.	-	.	gene_id "AF:1:54371262-54377458:54377759:54371262-54378247:54378320:-"; transcript_id "AF:1:54371262-54377458:54377759:54371262-54378247:54378320:-:alternative2";
1	hq_isoforms.fasta.no5merge.collapsed.gff	exon	54371162	54371262	.	-	.	gene_id "AF:1:54371262-54377458:54377759:54371262-54378247:54378320:-"; transcript_id "AF:1:54371262-54377458:54377759:54371262-54378247:54378320:-:alternative1";
1	hq_isoforms.fasta.no5merge.collapsed.gff	exon	54378247	54378320	.	-	.	gene_id "AF:1:54371262-54377458:54377759:54371262-54378247:54378320:-"; transcript_id "AF:1:54371262-54377458:54377759:54371262-54378247:54378320:-:alternative1";
1	hq_isoforms.fasta.no5merge.collapsed.gff	exon	54371162	54371262	.	-	.	gene_id "AF:1:54371262-54377458:54377759:54371262-54378247:54378306:-"; transcript_id "AF:1:54371262-54377458:54377759:54371262-54378247:54378306:-:alternative2";
1	hq_isoforms.fasta.no5merge.collapsed.gff	exon	54377458	54377759	.	-	.	gene_id "AF:1:54371262-54377458:54377759:54371262-54378247:54378306:-"; transcript_id "AF:1:54371262-54377458:54377759:54371262-54378247:54378306:-:alternative2";
1	hq_isoforms.fasta.no5merge.collapsed.gff	exon	54371162	54371262	.	-	.	gene_id "AF:1:54371262-54377458:54377759:54371262-54378247:54378306:-"; transcript_id "AF:1:54371262-54377458:54377759:54371262-54378247:54378306:-:alternative1";
1	hq_isoforms.fasta.no5merge.collapsed.gff	exon	54378247	54378306	.	-	.	gene_id "AF:1:54371262-54377458:54377759:54371262-54378247:54378306:-"; transcript_id "AF:1:54371262-54377458:54377759:54371262-54378247:54378306:-:alternative1";
1	hq_isoforms.fasta.no5merge.collapsed.gff	exon	54371162	54371262	.	-	.	gene_id "AF:1:54371262-54377458:54377759:54371262-54378247:54378323:-"; transcript_id "AF:1:54371262-54377458:54377759:54371262-54378247:54378323:-:alternative2";
1	hq_isoforms.fasta.no5merge.collapsed.gff	exon	54377458	54377759	.	-	.	gene_id "AF:1:54371262-54377458:54377759:54371262-54378247:54378323:-"; transcript_id "AF:1:54371262-54377458:54377759:54371262-54378247:54378323:-:alternative2";
1	hq_isoforms.fasta.no5merge.collapsed.gff	exon	54371162	54371262	.	-	.	gene_id "AF:1:54371262-54377458:54377759:54371262-54378247:54378323:-"; transcript_id "AF:1:54371262-54377458:54377759:54371262-54378247:54378323:-:alternative1";
1	hq_isoforms.fasta.no5merge.collapsed.gff	exon	54378247	54378323	.	-	.	gene_id "AF:1:54371262-54377458:54377759:54371262-54378247:54378323:-"; transcript_id "AF:1:54371262-54377458:54377759:54371262-54378247:54378323:-:alternative1";
1	hq_isoforms.fasta.no5merge.collapsed.gff	exon	56140779	56140879	.	-	.	gene_id "AF:1:56140879-56141622:56141872:56140879-56142222:56142282:-"; transcript_id "AF:1:56140879-56141622:56141872:56140879-56142222:56142282:-:alternative2";
1	hq_isoforms.fasta.no5merge.collapsed.gff	exon	56141622	56141872	.	-	.	gene_id "AF:1:56140879-56141622:56141872:56140879-56142222:56142282:-"; transcript_id "AF:1:56140879-56141622:56141872:56140879-56142222:56142282:-:alternative2";
1	hq_isoforms.fasta.no5merge.collapsed.gff	exon	56140779	56140879	.	-	.	gene_id "AF:1:56140879-56141622:56141872:56140879-56142222:56142282:-"; transcript_id "AF:1:56140879-56141622:56141872:56140879-56142222:56142282:-:alternative1";
1	hq_isoforms.fasta.no5merge.collapsed.gff	exon	56142222	56142282	.	-	.	gene_id "AF:1:56140879-56141622:56141872:56140879-56142222:56142282:-"; transcript_id "AF:1:56140879-56141622:56141872:56140879-56142222:56142282:-:alternative1";
1	hq_isoforms.fasta.no5merge.collapsed.gff	exon	56140779	56140879	.	-	.	gene_id "AF:1:56140879-56141622:56141872:56140879-56142222:56142285:-"; transcript_id "AF:1:56140879-56141622:56141872:56140879-56142222:56142285:-:alternative2";
1	hq_isoforms.fasta.no5merge.collapsed.gff	exon	56141622	56141872	.	-	.	gene_id "AF:1:56140879-56141622:56141872:56140879-56142222:56142285:-"; transcript_id "AF:1:56140879-56141622:56141872:56140879-56142222:56142285:-:alternative2";
1	hq_isoforms.fasta.no5merge.collapsed.gff	exon	56140779	56140879	.	-	.	gene_id "AF:1:56140879-56141622:56141872:56140879-56142222:56142285:-"; transcript_id "AF:1:56140879-56141622:56141872:56140879-56142222:56142285:-:alternative1";
1	hq_isoforms.fasta.no5merge.collapsed.gff	exon	56142222	56142285	.	-	.	gene_id "AF:1:56140879-56141622:56141872:56140879-56142222:56142285:-"; transcript_id "AF:1:56140879-56141622:56141872:56140879-56142222:56142285:-:alternative1";
1	hq_isoforms.fasta.no5merge.collapsed.gff	exon	56140779	56140879	.	-	.	gene_id "AF:1:56140879-56141622:56141872:56140879-56142222:56142280:-"; transcript_id "AF:1:56140879-56141622:56141872:56140879-56142222:56142280:-:alternative2";
1	hq_isoforms.fasta.no5merge.collapsed.gff	exon	56141622	56141872	.	-	.	gene_id "AF:1:56140879-56141622:56141872:56140879-56142222:56142280:-"; transcript_id "AF:1:56140879-56141622:56141872:56140879-56142222:56142280:-:alternative2";
1	hq_isoforms.fasta.no5merge.collapsed.gff	exon	56140779	56140879	.	-	.	gene_id "AF:1:56140879-56141622:56141872:56140879-56142222:56142280:-"; transcript_id "AF:1:56140879-56141622:56141872:56140879-56142222:56142280:-:alternative1";
1	hq_isoforms.fasta.no5merge.collapsed.gff	exon	56142222	56142280	.	-	.	gene_id "AF:1:56140879-56141622:56141872:56140879-56142222:56142280:-"; transcript_id "AF:1:56140879-56141622:56141872:56140879-56142222:56142280:-:alternative1";
1	hq_isoforms.fasta.no5merge.collapsed.gff	exon	56895944	56896044	.	-	.	gene_id "AF:1:56896044-56896597:56896698:56896044-56903927:56904038:-"; transcript_id "AF:1:56896044-56896597:56896698:56896044-56903927:56904038:-:alternative2";
1	hq_isoforms.fasta.no5merge.collapsed.gff	exon	56896597	56896698	.	-	.	gene_id "AF:1:56896044-56896597:56896698:56896044-56903927:56904038:-"; transcript_id "AF:1:56896044-56896597:56896698:56896044-56903927:56904038:-:alternative2";
1	hq_isoforms.fasta.no5merge.collapsed.gff	exon	56895944	56896044	.	-	.	gene_id "AF:1:56896044-56896597:56896698:56896044-56903927:56904038:-"; transcript_id "AF:1:56896044-56896597:56896698:56896044-56903927:56904038:-:alternative1";
1	hq_isoforms.fasta.no5merge.collapsed.gff	exon	56903927	56904038	.	-	.	gene_id "AF:1:56896044-56896597:56896698:56896044-56903927:56904038:-"; transcript_id "AF:1:56896044-56896597:56896698:56896044-56903927:56904038:-:alternative1";
1	hq_isoforms.fasta.no5merge.collapsed.gff	exon	56895944	56896044	.	-	.	gene_id "AF:1:56896044-56896597:56896698:56896044-56907848:56908160:-"; transcript_id "AF:1:56896044-56896597:56896698:56896044-56907848:56908160:-:alternative2";
1	hq_isoforms.fasta.no5merge.collapsed.gff	exon	56896597	56896698	.	-	.	gene_id "AF:1:56896044-56896597:56896698:56896044-56907848:56908160:-"; transcript_id "AF:1:56896044-56896597:56896698:56896044-56907848:56908160:-:alternative2";
1	hq_isoforms.fasta.no5merge.collapsed.gff	exon	56895944	56896044	.	-	.	gene_id "AF:1:56896044-56896597:56896698:56896044-56907848:56908160:-"; transcript_id "AF:1:56896044-56896597:56896698:56896044-56907848:56908160:-:alternative1";
1	hq_isoforms.fasta.no5merge.collapsed.gff	exon	56907848	56908160	.	-	.	gene_id "AF:1:56896044-56896597:56896698:56896044-56907848:56908160:-"; transcript_id "AF:1:56896044-56896597:56896698:56896044-56907848:56908160:-:alternative1";
1	hq_isoforms.fasta.no5merge.collapsed.gff	exon	56893635	56893735	.	-	.	gene_id "AF:1:56893735-56895935:56898851:56893735-56908100:56908241:-"; transcript_id "AF:1:56893735-56895935:56898851:56893735-56908100:56908241:-:alternative2";
1	hq_isoforms.fasta.no5merge.collapsed.gff	exon	56895935	56898851	.	-	.	gene_id "AF:1:56893735-56895935:56898851:56893735-56908100:56908241:-"; transcript_id "AF:1:56893735-56895935:56898851:56893735-56908100:56908241:-:alternative2";
1	hq_isoforms.fasta.no5merge.collapsed.gff	exon	56893635	56893735	.	-	.	gene_id "AF:1:56893735-56895935:56898851:56893735-56908100:56908241:-"; transcript_id "AF:1:56893735-56895935:56898851:56893735-56908100:56908241:-:alternative1";
1	hq_isoforms.fasta.no5merge.collapsed.gff	exon	56908100	56908241	.	-	.	gene_id "AF:1:56893735-56895935:56898851:56893735-56908100:56908241:-"; transcript_id "AF:1:56893735-56895935:56898851:56893735-56908100:56908241:-:alternative1";
1	hq_isoforms.fasta.no5merge.collapsed.gff	exon	56893635	56893735	.	-	.	gene_id "AF:1:56893735-56895935:56898851:56893735-56907848:56908118:-"; transcript_id "AF:1:56893735-56895935:56898851:56893735-56907848:56908118:-:alternative2";
1	hq_isoforms.fasta.no5merge.collapsed.gff	exon	56895935	56898851	.	-	.	gene_id "AF:1:56893735-56895935:56898851:56893735-56907848:56908118:-"; transcript_id "AF:1:56893735-56895935:56898851:56893735-56907848:56908118:-:alternative2";
1	hq_isoforms.fasta.no5merge.collapsed.gff	exon	56893635	56893735	.	-	.	gene_id "AF:1:56893735-56895935:56898851:56893735-56907848:56908118:-"; transcript_id "AF:1:56893735-56895935:56898851:56893735-56907848:56908118:-:alternative1";
1	hq_isoforms.fasta.no5merge.collapsed.gff	exon	56907848	56908118	.	-	.	gene_id "AF:1:56893735-56895935:56898851:56893735-56907848:56908118:-"; transcript_id "AF:1:56893735-56895935:56898851:56893735-56907848:56908118:-:alternative1";
1	hq_isoforms.fasta.no5merge.collapsed.gff	exon	56895944	56896044	.	-	.	gene_id "AF:1:56896044-56903927:56904038:56896044-56907848:56908160:-"; transcript_id "AF:1:56896044-56903927:56904038:56896044-56907848:56908160:-:alternative2";
1	hq_isoforms.fasta.no5merge.collapsed.gff	exon	56903927	56904038	.	-	.	gene_id "AF:1:56896044-56903927:56904038:56896044-56907848:56908160:-"; transcript_id "AF:1:56896044-56903927:56904038:56896044-56907848:56908160:-:alternative2";
1	hq_isoforms.fasta.no5merge.collapsed.gff	exon	56895944	56896044	.	-	.	gene_id "AF:1:56896044-56903927:56904038:56896044-56907848:56908160:-"; transcript_id "AF:1:56896044-56903927:56904038:56896044-56907848:56908160:-:alternative1";
1	hq_isoforms.fasta.no5merge.collapsed.gff	exon	56907848	56908160	.	-	.	gene_id "AF:1:56896044-56903927:56904038:56896044-56907848:56908160:-"; transcript_id "AF:1:56896044-56903927:56904038:56896044-56907848:56908160:-:alternative1";
1	hq_isoforms.fasta.no5merge.collapsed.gff	exon	56893635	56893735	.	-	.	gene_id "AF:1:56893735-56895935:56896047:56893735-56908100:56908241:-"; transcript_id "AF:1:56893735-56895935:56896047:56893735-56908100:56908241:-:alternative2";
1	hq_isoforms.fasta.no5merge.collapsed.gff	exon	56895935	56896047	.	-	.	gene_id "AF:1:56893735-56895935:56896047:56893735-56908100:56908241:-"; transcript_id "AF:1:56893735-56895935:56896047:56893735-56908100:56908241:-:alternative2";
1	hq_isoforms.fasta.no5merge.collapsed.gff	exon	56893635	56893735	.	-	.	gene_id "AF:1:56893735-56895935:56896047:56893735-56908100:56908241:-"; transcript_id "AF:1:56893735-56895935:56896047:56893735-56908100:56908241:-:alternative1";
1	hq_isoforms.fasta.no5merge.collapsed.gff	exon	56908100	56908241	.	-	.	gene_id "AF:1:56893735-56895935:56896047:56893735-56908100:56908241:-"; transcript_id "AF:1:56893735-56895935:56896047:56893735-56908100:56908241:-:alternative1";
1	hq_isoforms.fasta.no5merge.collapsed.gff	exon	56893635	56893735	.	-	.	gene_id "AF:1:56893735-56895935:56896047:56893735-56907848:56908118:-"; transcript_id "AF:1:56893735-56895935:56896047:56893735-56907848:56908118:-:alternative2";
1	hq_isoforms.fasta.no5merge.collapsed.gff	exon	56895935	56896047	.	-	.	gene_id "AF:1:56893735-56895935:56896047:56893735-56907848:56908118:-"; transcript_id "AF:1:56893735-56895935:56896047:56893735-56907848:56908118:-:alternative2";
1	hq_isoforms.fasta.no5merge.collapsed.gff	exon	56893635	56893735	.	-	.	gene_id "AF:1:56893735-56895935:56896047:56893735-56907848:56908118:-"; transcript_id "AF:1:56893735-56895935:56896047:56893735-56907848:56908118:-:alternative1";
1	hq_isoforms.fasta.no5merge.collapsed.gff	exon	56907848	56908118	.	-	.	gene_id "AF:1:56893735-56895935:56896047:56893735-56907848:56908118:-"; transcript_id "AF:1:56893735-56895935:56896047:56893735-56907848:56908118:-:alternative1";
1	hq_isoforms.fasta.no5merge.collapsed.gff	exon	57749290	57749390	.	-	.	gene_id "AF:1:57749390-57750909:57750948:57749390-57750993:57751090:-"; transcript_id "AF:1:57749390-57750909:57750948:57749390-57750993:57751090:-:alternative2";
1	hq_isoforms.fasta.no5merge.collapsed.gff	exon	57750909	57750948	.	-	.	gene_id "AF:1:57749390-57750909:57750948:57749390-57750993:57751090:-"; transcript_id "AF:1:57749390-57750909:57750948:57749390-57750993:57751090:-:alternative2";
1	hq_isoforms.fasta.no5merge.collapsed.gff	exon	57749290	57749390	.	-	.	gene_id "AF:1:57749390-57750909:57750948:57749390-57750993:57751090:-"; transcript_id "AF:1:57749390-57750909:57750948:57749390-57750993:57751090:-:alternative1";
1	hq_isoforms.fasta.no5merge.collapsed.gff	exon	57750993	57751090	.	-	.	gene_id "AF:1:57749390-57750909:57750948:57749390-57750993:57751090:-"; transcript_id "AF:1:57749390-57750909:57750948:57749390-57750993:57751090:-:alternative1";
1	hq_isoforms.fasta.no5merge.collapsed.gff	exon	59148695	59148795	.	-	.	gene_id "AF:1:59148795-59150591:59150820:59148795-59153712:59153940:-"; transcript_id "AF:1:59148795-59150591:59150820:59148795-59153712:59153940:-:alternative2";
1	hq_isoforms.fasta.no5merge.collapsed.gff	exon	59150591	59150820	.	-	.	gene_id "AF:1:59148795-59150591:59150820:59148795-59153712:59153940:-"; transcript_id "AF:1:59148795-59150591:59150820:59148795-59153712:59153940:-:alternative2";
1	hq_isoforms.fasta.no5merge.collapsed.gff	exon	59148695	59148795	.	-	.	gene_id "AF:1:59148795-59150591:59150820:59148795-59153712:59153940:-"; transcript_id "AF:1:59148795-59150591:59150820:59148795-59153712:59153940:-:alternative1";
1	hq_isoforms.fasta.no5merge.collapsed.gff	exon	59153712	59153940	.	-	.	gene_id "AF:1:59148795-59150591:59150820:59148795-59153712:59153940:-"; transcript_id "AF:1:59148795-59150591:59150820:59148795-59153712:59153940:-:alternative1";
1	hq_isoforms.fasta.no5merge.collapsed.gff	exon	59148695	59148795	.	-	.	gene_id "AF:1:59148795-59150591:59150820:59148795-59153712:59153923:-"; transcript_id "AF:1:59148795-59150591:59150820:59148795-59153712:59153923:-:alternative2";
1	hq_isoforms.fasta.no5merge.collapsed.gff	exon	59150591	59150820	.	-	.	gene_id "AF:1:59148795-59150591:59150820:59148795-59153712:59153923:-"; transcript_id "AF:1:59148795-59150591:59150820:59148795-59153712:59153923:-:alternative2";
1	hq_isoforms.fasta.no5merge.collapsed.gff	exon	59148695	59148795	.	-	.	gene_id "AF:1:59148795-59150591:59150820:59148795-59153712:59153923:-"; transcript_id "AF:1:59148795-59150591:59150820:59148795-59153712:59153923:-:alternative1";
1	hq_isoforms.fasta.no5merge.collapsed.gff	exon	59153712	59153923	.	-	.	gene_id "AF:1:59148795-59150591:59150820:59148795-59153712:59153923:-"; transcript_id "AF:1:59148795-59150591:59150820:59148795-59153712:59153923:-:alternative1";
1	hq_isoforms.fasta.no5merge.collapsed.gff	exon	59148695	59148795	.	-	.	gene_id "AF:1:59148795-59150591:59150820:59148795-59153712:59153922:-"; transcript_id "AF:1:59148795-59150591:59150820:59148795-59153712:59153922:-:alternative2";
1	hq_isoforms.fasta.no5merge.collapsed.gff	exon	59150591	59150820	.	-	.	gene_id "AF:1:59148795-59150591:59150820:59148795-59153712:59153922:-"; transcript_id "AF:1:59148795-59150591:59150820:59148795-59153712:59153922:-:alternative2";
1	hq_isoforms.fasta.no5merge.collapsed.gff	exon	59148695	59148795	.	-	.	gene_id "AF:1:59148795-59150591:59150820:59148795-59153712:59153922:-"; transcript_id "AF:1:59148795-59150591:59150820:59148795-59153712:59153922:-:alternative1";
1	hq_isoforms.fasta.no5merge.collapsed.gff	exon	59153712	59153922	.	-	.	gene_id "AF:1:59148795-59150591:59150820:59148795-59153712:59153922:-"; transcript_id "AF:1:59148795-59150591:59150820:59148795-59153712:59153922:-:alternative1";
1	hq_isoforms.fasta.no5merge.collapsed.gff	exon	59148695	59148795	.	-	.	gene_id "AF:1:59148795-59150591:59150820:59148795-59153712:59153920:-"; transcript_id "AF:1:59148795-59150591:59150820:59148795-59153712:59153920:-:alternative2";
1	hq_isoforms.fasta.no5merge.collapsed.gff	exon	59150591	59150820	.	-	.	gene_id "AF:1:59148795-59150591:59150820:59148795-59153712:59153920:-"; transcript_id "AF:1:59148795-59150591:59150820:59148795-59153712:59153920:-:alternative2";
1	hq_isoforms.fasta.no5merge.collapsed.gff	exon	59148695	59148795	.	-	.	gene_id "AF:1:59148795-59150591:59150820:59148795-59153712:59153920:-"; transcript_id "AF:1:59148795-59150591:59150820:59148795-59153712:59153920:-:alternative1";
1	hq_isoforms.fasta.no5merge.collapsed.gff	exon	59153712	59153920	.	-	.	gene_id "AF:1:59148795-59150591:59150820:59148795-59153712:59153920:-"; transcript_id "AF:1:59148795-59150591:59150820:59148795-59153712:59153920:-:alternative1";
1	hq_isoforms.fasta.no5merge.collapsed.gff	exon	59148695	59148795	.	-	.	gene_id "AF:1:59148795-59150591:59150820:59148795-59153712:59153817:-"; transcript_id "AF:1:59148795-59150591:59150820:59148795-59153712:59153817:-:alternative2";
1	hq_isoforms.fasta.no5merge.collapsed.gff	exon	59150591	59150820	.	-	.	gene_id "AF:1:59148795-59150591:59150820:59148795-59153712:59153817:-"; transcript_id "AF:1:59148795-59150591:59150820:59148795-59153712:59153817:-:alternative2";
1	hq_isoforms.fasta.no5merge.collapsed.gff	exon	59148695	59148795	.	-	.	gene_id "AF:1:59148795-59150591:59150820:59148795-59153712:59153817:-"; transcript_id "AF:1:59148795-59150591:59150820:59148795-59153712:59153817:-:alternative1";
1	hq_isoforms.fasta.no5merge.collapsed.gff	exon	59153712	59153817	.	-	.	gene_id "AF:1:59148795-59150591:59150820:59148795-59153712:59153817:-"; transcript_id "AF:1:59148795-59150591:59150820:59148795-59153712:59153817:-:alternative1";
1	hq_isoforms.fasta.no5merge.collapsed.gff	exon	59360184	59360284	.	-	.	gene_id "AF:1:59360284-59361536:59361717:59360284-59362316:59362356:-"; transcript_id "AF:1:59360284-59361536:59361717:59360284-59362316:59362356:-:alternative2";
1	hq_isoforms.fasta.no5merge.collapsed.gff	exon	59361536	59361717	.	-	.	gene_id "AF:1:59360284-59361536:59361717:59360284-59362316:59362356:-"; transcript_id "AF:1:59360284-59361536:59361717:59360284-59362316:59362356:-:alternative2";
1	hq_isoforms.fasta.no5merge.collapsed.gff	exon	59360184	59360284	.	-	.	gene_id "AF:1:59360284-59361536:59361717:59360284-59362316:59362356:-"; transcript_id "AF:1:59360284-59361536:59361717:59360284-59362316:59362356:-:alternative1";
1	hq_isoforms.fasta.no5merge.collapsed.gff	exon	59362316	59362356	.	-	.	gene_id "AF:1:59360284-59361536:59361717:59360284-59362316:59362356:-"; transcript_id "AF:1:59360284-59361536:59361717:59360284-59362316:59362356:-:alternative1";
1	hq_isoforms.fasta.no5merge.collapsed.gff	exon	59360184	59360284	.	-	.	gene_id "AF:1:59360284-59361536:59361717:59360284-59362316:59362343:-"; transcript_id "AF:1:59360284-59361536:59361717:59360284-59362316:59362343:-:alternative2";
1	hq_isoforms.fasta.no5merge.collapsed.gff	exon	59361536	59361717	.	-	.	gene_id "AF:1:59360284-59361536:59361717:59360284-59362316:59362343:-"; transcript_id "AF:1:59360284-59361536:59361717:59360284-59362316:59362343:-:alternative2";
1	hq_isoforms.fasta.no5merge.collapsed.gff	exon	59360184	59360284	.	-	.	gene_id "AF:1:59360284-59361536:59361717:59360284-59362316:59362343:-"; transcript_id "AF:1:59360284-59361536:59361717:59360284-59362316:59362343:-:alternative1";
1	hq_isoforms.fasta.no5merge.collapsed.gff	exon	59362316	59362343	.	-	.	gene_id "AF:1:59360284-59361536:59361717:59360284-59362316:59362343:-"; transcript_id "AF:1:59360284-59361536:59361717:59360284-59362316:59362343:-:alternative1";
1	hq_isoforms.fasta.no5merge.collapsed.gff	exon	60135013	60135113	.	-	.	gene_id "AF:1:60135113-60137695:60137765:60135113-60235717:60236020:-"; transcript_id "AF:1:60135113-60137695:60137765:60135113-60235717:60236020:-:alternative2";
1	hq_isoforms.fasta.no5merge.collapsed.gff	exon	60137695	60137765	.	-	.	gene_id "AF:1:60135113-60137695:60137765:60135113-60235717:60236020:-"; transcript_id "AF:1:60135113-60137695:60137765:60135113-60235717:60236020:-:alternative2";
1	hq_isoforms.fasta.no5merge.collapsed.gff	exon	60135013	60135113	.	-	.	gene_id "AF:1:60135113-60137695:60137765:60135113-60235717:60236020:-"; transcript_id "AF:1:60135113-60137695:60137765:60135113-60235717:60236020:-:alternative1";
1	hq_isoforms.fasta.no5merge.collapsed.gff	exon	60235717	60236020	.	-	.	gene_id "AF:1:60135113-60137695:60137765:60135113-60235717:60236020:-"; transcript_id "AF:1:60135113-60137695:60137765:60135113-60235717:60236020:-:alternative1";
1	hq_isoforms.fasta.no5merge.collapsed.gff	exon	60135013	60135113	.	-	.	gene_id "AF:1:60135113-60137695:60140492:60135113-60235717:60236020:-"; transcript_id "AF:1:60135113-60137695:60140492:60135113-60235717:60236020:-:alternative2";
1	hq_isoforms.fasta.no5merge.collapsed.gff	exon	60137695	60140492	.	-	.	gene_id "AF:1:60135113-60137695:60140492:60135113-60235717:60236020:-"; transcript_id "AF:1:60135113-60137695:60140492:60135113-60235717:60236020:-:alternative2";
1	hq_isoforms.fasta.no5merge.collapsed.gff	exon	60135013	60135113	.	-	.	gene_id "AF:1:60135113-60137695:60140492:60135113-60235717:60236020:-"; transcript_id "AF:1:60135113-60137695:60140492:60135113-60235717:60236020:-:alternative1";
1	hq_isoforms.fasta.no5merge.collapsed.gff	exon	60235717	60236020	.	-	.	gene_id "AF:1:60135113-60137695:60140492:60135113-60235717:60236020:-"; transcript_id "AF:1:60135113-60137695:60140492:60135113-60235717:60236020:-:alternative1";
1	hq_isoforms.fasta.no5merge.collapsed.gff	exon	64441459	64441559	.	-	.	gene_id "AF:1:64441559-64450877:64450961:64441559-64488549:64488581:-"; transcript_id "AF:1:64441559-64450877:64450961:64441559-64488549:64488581:-:alternative2";
1	hq_isoforms.fasta.no5merge.collapsed.gff	exon	64450877	64450961	.	-	.	gene_id "AF:1:64441559-64450877:64450961:64441559-64488549:64488581:-"; transcript_id "AF:1:64441559-64450877:64450961:64441559-64488549:64488581:-:alternative2";
1	hq_isoforms.fasta.no5merge.collapsed.gff	exon	64441459	64441559	.	-	.	gene_id "AF:1:64441559-64450877:64450961:64441559-64488549:64488581:-"; transcript_id "AF:1:64441559-64450877:64450961:64441559-64488549:64488581:-:alternative1";
1	hq_isoforms.fasta.no5merge.collapsed.gff	exon	64488549	64488581	.	-	.	gene_id "AF:1:64441559-64450877:64450961:64441559-64488549:64488581:-"; transcript_id "AF:1:64441559-64450877:64450961:64441559-64488549:64488581:-:alternative1";
1	hq_isoforms.fasta.no5merge.collapsed.gff	exon	64441459	64441559	.	-	.	gene_id "AF:1:64441559-64450877:64450961:64441559-64488549:64488624:-"; transcript_id "AF:1:64441559-64450877:64450961:64441559-64488549:64488624:-:alternative2";
1	hq_isoforms.fasta.no5merge.collapsed.gff	exon	64450877	64450961	.	-	.	gene_id "AF:1:64441559-64450877:64450961:64441559-64488549:64488624:-"; transcript_id "AF:1:64441559-64450877:64450961:64441559-64488549:64488624:-:alternative2";
1	hq_isoforms.fasta.no5merge.collapsed.gff	exon	64441459	64441559	.	-	.	gene_id "AF:1:64441559-64450877:64450961:64441559-64488549:64488624:-"; transcript_id "AF:1:64441559-64450877:64450961:64441559-64488549:64488624:-:alternative1";
1	hq_isoforms.fasta.no5merge.collapsed.gff	exon	64488549	64488624	.	-	.	gene_id "AF:1:64441559-64450877:64450961:64441559-64488549:64488624:-"; transcript_id "AF:1:64441559-64450877:64450961:64441559-64488549:64488624:-:alternative1";
1	hq_isoforms.fasta.no5merge.collapsed.gff	exon	64441459	64441559	.	-	.	gene_id "AF:1:64441559-64450877:64450961:64441559-64488549:64488600:-"; transcript_id "AF:1:64441559-64450877:64450961:64441559-64488549:64488600:-:alternative2";
1	hq_isoforms.fasta.no5merge.collapsed.gff	exon	64450877	64450961	.	-	.	gene_id "AF:1:64441559-64450877:64450961:64441559-64488549:64488600:-"; transcript_id "AF:1:64441559-64450877:64450961:64441559-64488549:64488600:-:alternative2";
1	hq_isoforms.fasta.no5merge.collapsed.gff	exon	64441459	64441559	.	-	.	gene_id "AF:1:64441559-64450877:64450961:64441559-64488549:64488600:-"; transcript_id "AF:1:64441559-64450877:64450961:64441559-64488549:64488600:-:alternative1";
1	hq_isoforms.fasta.no5merge.collapsed.gff	exon	64488549	64488600	.	-	.	gene_id "AF:1:64441559-64450877:64450961:64441559-64488549:64488600:-"; transcript_id "AF:1:64441559-64450877:64450961:64441559-64488549:64488600:-:alternative1";
1	hq_isoforms.fasta.no5merge.collapsed.gff	exon	65850869	65850969	.	-	.	gene_id "AF:1:65850969-65858415:65858861:65850969-65860345:65860479:-"; transcript_id "AF:1:65850969-65858415:65858861:65850969-65860345:65860479:-:alternative2";
1	hq_isoforms.fasta.no5merge.collapsed.gff	exon	65858415	65858861	.	-	.	gene_id "AF:1:65850969-65858415:65858861:65850969-65860345:65860479:-"; transcript_id "AF:1:65850969-65858415:65858861:65850969-65860345:65860479:-:alternative2";
1	hq_isoforms.fasta.no5merge.collapsed.gff	exon	65850869	65850969	.	-	.	gene_id "AF:1:65850969-65858415:65858861:65850969-65860345:65860479:-"; transcript_id "AF:1:65850969-65858415:65858861:65850969-65860345:65860479:-:alternative1";
1	hq_isoforms.fasta.no5merge.collapsed.gff	exon	65860345	65860479	.	-	.	gene_id "AF:1:65850969-65858415:65858861:65850969-65860345:65860479:-"; transcript_id "AF:1:65850969-65858415:65858861:65850969-65860345:65860479:-:alternative1";
1	hq_isoforms.fasta.no5merge.collapsed.gff	exon	67896596	67896696	.	-	.	gene_id "AF:1:67896696-67896948:67896992:67896696-67962997:67963307:-"; transcript_id "AF:1:67896696-67896948:67896992:67896696-67962997:67963307:-:alternative2";
1	hq_isoforms.fasta.no5merge.collapsed.gff	exon	67896948	67896992	.	-	.	gene_id "AF:1:67896696-67896948:67896992:67896696-67962997:67963307:-"; transcript_id "AF:1:67896696-67896948:67896992:67896696-67962997:67963307:-:alternative2";
1	hq_isoforms.fasta.no5merge.collapsed.gff	exon	67896596	67896696	.	-	.	gene_id "AF:1:67896696-67896948:67896992:67896696-67962997:67963307:-"; transcript_id "AF:1:67896696-67896948:67896992:67896696-67962997:67963307:-:alternative1";
1	hq_isoforms.fasta.no5merge.collapsed.gff	exon	67962997	67963307	.	-	.	gene_id "AF:1:67896696-67896948:67896992:67896696-67962997:67963307:-"; transcript_id "AF:1:67896696-67896948:67896992:67896696-67962997:67963307:-:alternative1";
1	hq_isoforms.fasta.no5merge.collapsed.gff	exon	67896596	67896696	.	-	.	gene_id "AF:1:67896696-67896948:67896992:67896696-67962838:67962961:-"; transcript_id "AF:1:67896696-67896948:67896992:67896696-67962838:67962961:-:alternative2";
1	hq_isoforms.fasta.no5merge.collapsed.gff	exon	67896948	67896992	.	-	.	gene_id "AF:1:67896696-67896948:67896992:67896696-67962838:67962961:-"; transcript_id "AF:1:67896696-67896948:67896992:67896696-67962838:67962961:-:alternative2";
1	hq_isoforms.fasta.no5merge.collapsed.gff	exon	67896596	67896696	.	-	.	gene_id "AF:1:67896696-67896948:67896992:67896696-67962838:67962961:-"; transcript_id "AF:1:67896696-67896948:67896992:67896696-67962838:67962961:-:alternative1";
1	hq_isoforms.fasta.no5merge.collapsed.gff	exon	67962838	67962961	.	-	.	gene_id "AF:1:67896696-67896948:67896992:67896696-67962838:67962961:-"; transcript_id "AF:1:67896696-67896948:67896992:67896696-67962838:67962961:-:alternative1";
1	hq_isoforms.fasta.no5merge.collapsed.gff	exon	67896596	67896696	.	-	.	gene_id "AF:1:67896696-67896948:67896992:67896696-67962997:67963303:-"; transcript_id "AF:1:67896696-67896948:67896992:67896696-67962997:67963303:-:alternative2";
1	hq_isoforms.fasta.no5merge.collapsed.gff	exon	67896948	67896992	.	-	.	gene_id "AF:1:67896696-67896948:67896992:67896696-67962997:67963303:-"; transcript_id "AF:1:67896696-67896948:67896992:67896696-67962997:67963303:-:alternative2";
1	hq_isoforms.fasta.no5merge.collapsed.gff	exon	67896596	67896696	.	-	.	gene_id "AF:1:67896696-67896948:67896992:67896696-67962997:67963303:-"; transcript_id "AF:1:67896696-67896948:67896992:67896696-67962997:67963303:-:alternative1";
1	hq_isoforms.fasta.no5merge.collapsed.gff	exon	67962997	67963303	.	-	.	gene_id "AF:1:67896696-67896948:67896992:67896696-67962997:67963303:-"; transcript_id "AF:1:67896696-67896948:67896992:67896696-67962997:67963303:-:alternative1";
1	hq_isoforms.fasta.no5merge.collapsed.gff	exon	67896596	67896696	.	-	.	gene_id "AF:1:67896696-67962838:67962961:67896696-67962997:67963307:-"; transcript_id "AF:1:67896696-67962838:67962961:67896696-67962997:67963307:-:alternative2";
1	hq_isoforms.fasta.no5merge.collapsed.gff	exon	67962838	67962961	.	-	.	gene_id "AF:1:67896696-67962838:67962961:67896696-67962997:67963307:-"; transcript_id "AF:1:67896696-67962838:67962961:67896696-67962997:67963307:-:alternative2";
1	hq_isoforms.fasta.no5merge.collapsed.gff	exon	67896596	67896696	.	-	.	gene_id "AF:1:67896696-67962838:67962961:67896696-67962997:67963307:-"; transcript_id "AF:1:67896696-67962838:67962961:67896696-67962997:67963307:-:alternative1";
1	hq_isoforms.fasta.no5merge.collapsed.gff	exon	67962997	67963307	.	-	.	gene_id "AF:1:67896696-67962838:67962961:67896696-67962997:67963307:-"; transcript_id "AF:1:67896696-67962838:67962961:67896696-67962997:67963307:-:alternative1";
1	hq_isoforms.fasta.no5merge.collapsed.gff	exon	67896596	67896696	.	-	.	gene_id "AF:1:67896696-67962838:67962961:67896696-67962997:67963303:-"; transcript_id "AF:1:67896696-67962838:67962961:67896696-67962997:67963303:-:alternative2";
1	hq_isoforms.fasta.no5merge.collapsed.gff	exon	67962838	67962961	.	-	.	gene_id "AF:1:67896696-67962838:67962961:67896696-67962997:67963303:-"; transcript_id "AF:1:67896696-67962838:67962961:67896696-67962997:67963303:-:alternative2";
1	hq_isoforms.fasta.no5merge.collapsed.gff	exon	67896596	67896696	.	-	.	gene_id "AF:1:67896696-67962838:67962961:67896696-67962997:67963303:-"; transcript_id "AF:1:67896696-67962838:67962961:67896696-67962997:67963303:-:alternative1";
1	hq_isoforms.fasta.no5merge.collapsed.gff	exon	67962997	67963303	.	-	.	gene_id "AF:1:67896696-67962838:67962961:67896696-67962997:67963303:-"; transcript_id "AF:1:67896696-67962838:67962961:67896696-67962997:67963303:-:alternative1";
1	hq_isoforms.fasta.no5merge.collapsed.gff	exon	68287514	68287614	.	-	.	gene_id "AF:1:68287614-68292402:68292463:68287614-68308163:68308181:-"; transcript_id "AF:1:68287614-68292402:68292463:68287614-68308163:68308181:-:alternative2";
1	hq_isoforms.fasta.no5merge.collapsed.gff	exon	68292402	68292463	.	-	.	gene_id "AF:1:68287614-68292402:68292463:68287614-68308163:68308181:-"; transcript_id "AF:1:68287614-68292402:68292463:68287614-68308163:68308181:-:alternative2";
1	hq_isoforms.fasta.no5merge.collapsed.gff	exon	68287514	68287614	.	-	.	gene_id "AF:1:68287614-68292402:68292463:68287614-68308163:68308181:-"; transcript_id "AF:1:68287614-68292402:68292463:68287614-68308163:68308181:-:alternative1";
1	hq_isoforms.fasta.no5merge.collapsed.gff	exon	68308163	68308181	.	-	.	gene_id "AF:1:68287614-68292402:68292463:68287614-68308163:68308181:-"; transcript_id "AF:1:68287614-68292402:68292463:68287614-68308163:68308181:-:alternative1";
1	hq_isoforms.fasta.no5merge.collapsed.gff	exon	68287514	68287614	.	-	.	gene_id "AF:1:68287614-68292402:68292463:68287614-68308163:68308187:-"; transcript_id "AF:1:68287614-68292402:68292463:68287614-68308163:68308187:-:alternative2";
1	hq_isoforms.fasta.no5merge.collapsed.gff	exon	68292402	68292463	.	-	.	gene_id "AF:1:68287614-68292402:68292463:68287614-68308163:68308187:-"; transcript_id "AF:1:68287614-68292402:68292463:68287614-68308163:68308187:-:alternative2";
1	hq_isoforms.fasta.no5merge.collapsed.gff	exon	68287514	68287614	.	-	.	gene_id "AF:1:68287614-68292402:68292463:68287614-68308163:68308187:-"; transcript_id "AF:1:68287614-68292402:68292463:68287614-68308163:68308187:-:alternative1";
1	hq_isoforms.fasta.no5merge.collapsed.gff	exon	68308163	68308187	.	-	.	gene_id "AF:1:68287614-68292402:68292463:68287614-68308163:68308187:-"; transcript_id "AF:1:68287614-68292402:68292463:68287614-68308163:68308187:-:alternative1";
1	hq_isoforms.fasta.no5merge.collapsed.gff	exon	68544506	68544606	.	-	.	gene_id "AF:1:68544606-68545599:68545752:68544606-68546054:68546223:-"; transcript_id "AF:1:68544606-68545599:68545752:68544606-68546054:68546223:-:alternative2";
1	hq_isoforms.fasta.no5merge.collapsed.gff	exon	68545599	68545752	.	-	.	gene_id "AF:1:68544606-68545599:68545752:68544606-68546054:68546223:-"; transcript_id "AF:1:68544606-68545599:68545752:68544606-68546054:68546223:-:alternative2";
1	hq_isoforms.fasta.no5merge.collapsed.gff	exon	68544506	68544606	.	-	.	gene_id "AF:1:68544606-68545599:68545752:68544606-68546054:68546223:-"; transcript_id "AF:1:68544606-68545599:68545752:68544606-68546054:68546223:-:alternative1";
1	hq_isoforms.fasta.no5merge.collapsed.gff	exon	68546054	68546223	.	-	.	gene_id "AF:1:68544606-68545599:68545752:68544606-68546054:68546223:-"; transcript_id "AF:1:68544606-68545599:68545752:68544606-68546054:68546223:-:alternative1";
1	hq_isoforms.fasta.no5merge.collapsed.gff	exon	68544506	68544606	.	-	.	gene_id "AF:1:68544606-68545599:68545752:68544606-68546054:68546248:-"; transcript_id "AF:1:68544606-68545599:68545752:68544606-68546054:68546248:-:alternative2";
1	hq_isoforms.fasta.no5merge.collapsed.gff	exon	68545599	68545752	.	-	.	gene_id "AF:1:68544606-68545599:68545752:68544606-68546054:68546248:-"; transcript_id "AF:1:68544606-68545599:68545752:68544606-68546054:68546248:-:alternative2";
1	hq_isoforms.fasta.no5merge.collapsed.gff	exon	68544506	68544606	.	-	.	gene_id "AF:1:68544606-68545599:68545752:68544606-68546054:68546248:-"; transcript_id "AF:1:68544606-68545599:68545752:68544606-68546054:68546248:-:alternative1";
1	hq_isoforms.fasta.no5merge.collapsed.gff	exon	68546054	68546248	.	-	.	gene_id "AF:1:68544606-68545599:68545752:68544606-68546054:68546248:-"; transcript_id "AF:1:68544606-68545599:68545752:68544606-68546054:68546248:-:alternative1";
1	hq_isoforms.fasta.no5merge.collapsed.gff	exon	68544506	68544606	.	-	.	gene_id "AF:1:68544606-68545599:68545752:68544606-68546054:68546192:-"; transcript_id "AF:1:68544606-68545599:68545752:68544606-68546054:68546192:-:alternative2";
1	hq_isoforms.fasta.no5merge.collapsed.gff	exon	68545599	68545752	.	-	.	gene_id "AF:1:68544606-68545599:68545752:68544606-68546054:68546192:-"; transcript_id "AF:1:68544606-68545599:68545752:68544606-68546054:68546192:-:alternative2";
1	hq_isoforms.fasta.no5merge.collapsed.gff	exon	68544506	68544606	.	-	.	gene_id "AF:1:68544606-68545599:68545752:68544606-68546054:68546192:-"; transcript_id "AF:1:68544606-68545599:68545752:68544606-68546054:68546192:-:alternative1";
1	hq_isoforms.fasta.no5merge.collapsed.gff	exon	68546054	68546192	.	-	.	gene_id "AF:1:68544606-68545599:68545752:68544606-68546054:68546192:-"; transcript_id "AF:1:68544606-68545599:68545752:68544606-68546054:68546192:-:alternative1";
1	hq_isoforms.fasta.no5merge.collapsed.gff	exon	69775840	69775940	.	-	.	gene_id "AF:1:69775940-69822554:69823144:69775940-69824746:69825066:-"; transcript_id "AF:1:69775940-69822554:69823144:69775940-69824746:69825066:-:alternative2";
1	hq_isoforms.fasta.no5merge.collapsed.gff	exon	69822554	69823144	.	-	.	gene_id "AF:1:69775940-69822554:69823144:69775940-69824746:69825066:-"; transcript_id "AF:1:69775940-69822554:69823144:69775940-69824746:69825066:-:alternative2";
1	hq_isoforms.fasta.no5merge.collapsed.gff	exon	69775840	69775940	.	-	.	gene_id "AF:1:69775940-69822554:69823144:69775940-69824746:69825066:-"; transcript_id "AF:1:69775940-69822554:69823144:69775940-69824746:69825066:-:alternative1";
1	hq_isoforms.fasta.no5merge.collapsed.gff	exon	69824746	69825066	.	-	.	gene_id "AF:1:69775940-69822554:69823144:69775940-69824746:69825066:-"; transcript_id "AF:1:69775940-69822554:69823144:69775940-69824746:69825066:-:alternative1";
1	hq_isoforms.fasta.no5merge.collapsed.gff	exon	69775840	69775940	.	-	.	gene_id "AF:1:69775940-69822554:69823144:69775940-69824746:69824996:-"; transcript_id "AF:1:69775940-69822554:69823144:69775940-69824746:69824996:-:alternative2";
1	hq_isoforms.fasta.no5merge.collapsed.gff	exon	69822554	69823144	.	-	.	gene_id "AF:1:69775940-69822554:69823144:69775940-69824746:69824996:-"; transcript_id "AF:1:69775940-69822554:69823144:69775940-69824746:69824996:-:alternative2";
1	hq_isoforms.fasta.no5merge.collapsed.gff	exon	69775840	69775940	.	-	.	gene_id "AF:1:69775940-69822554:69823144:69775940-69824746:69824996:-"; transcript_id "AF:1:69775940-69822554:69823144:69775940-69824746:69824996:-:alternative1";
1	hq_isoforms.fasta.no5merge.collapsed.gff	exon	69824746	69824996	.	-	.	gene_id "AF:1:69775940-69822554:69823144:69775940-69824746:69824996:-"; transcript_id "AF:1:69775940-69822554:69823144:69775940-69824746:69824996:-:alternative1";
1	hq_isoforms.fasta.no5merge.collapsed.gff	exon	69961128	69961228	.	-	.	gene_id "AF:1:69961228-69964211:69966188:69961228-69981922:69982046:-"; transcript_id "AF:1:69961228-69964211:69966188:69961228-69981922:69982046:-:alternative2";
1	hq_isoforms.fasta.no5merge.collapsed.gff	exon	69964211	69966188	.	-	.	gene_id "AF:1:69961228-69964211:69966188:69961228-69981922:69982046:-"; transcript_id "AF:1:69961228-69964211:69966188:69961228-69981922:69982046:-:alternative2";
1	hq_isoforms.fasta.no5merge.collapsed.gff	exon	69961128	69961228	.	-	.	gene_id "AF:1:69961228-69964211:69966188:69961228-69981922:69982046:-"; transcript_id "AF:1:69961228-69964211:69966188:69961228-69981922:69982046:-:alternative1";
1	hq_isoforms.fasta.no5merge.collapsed.gff	exon	69981922	69982046	.	-	.	gene_id "AF:1:69961228-69964211:69966188:69961228-69981922:69982046:-"; transcript_id "AF:1:69961228-69964211:69966188:69961228-69981922:69982046:-:alternative1";
1	hq_isoforms.fasta.no5merge.collapsed.gff	exon	69981945	69982045	.	-	.	gene_id "AF:1:69982045-69983502:69983626:69982045-69985232:69985419:-"; transcript_id "AF:1:69982045-69983502:69983626:69982045-69985232:69985419:-:alternative2";
1	hq_isoforms.fasta.no5merge.collapsed.gff	exon	69983502	69983626	.	-	.	gene_id "AF:1:69982045-69983502:69983626:69982045-69985232:69985419:-"; transcript_id "AF:1:69982045-69983502:69983626:69982045-69985232:69985419:-:alternative2";
1	hq_isoforms.fasta.no5merge.collapsed.gff	exon	69981945	69982045	.	-	.	gene_id "AF:1:69982045-69983502:69983626:69982045-69985232:69985419:-"; transcript_id "AF:1:69982045-69983502:69983626:69982045-69985232:69985419:-:alternative1";
1	hq_isoforms.fasta.no5merge.collapsed.gff	exon	69985232	69985419	.	-	.	gene_id "AF:1:69982045-69983502:69983626:69982045-69985232:69985419:-"; transcript_id "AF:1:69982045-69983502:69983626:69982045-69985232:69985419:-:alternative1";
1	hq_isoforms.fasta.no5merge.collapsed.gff	exon	69981945	69982045	.	-	.	gene_id "AF:1:69982045-69983502:69983626:69982045-69985232:69985428:-"; transcript_id "AF:1:69982045-69983502:69983626:69982045-69985232:69985428:-:alternative2";
1	hq_isoforms.fasta.no5merge.collapsed.gff	exon	69983502	69983626	.	-	.	gene_id "AF:1:69982045-69983502:69983626:69982045-69985232:69985428:-"; transcript_id "AF:1:69982045-69983502:69983626:69982045-69985232:69985428:-:alternative2";
1	hq_isoforms.fasta.no5merge.collapsed.gff	exon	69981945	69982045	.	-	.	gene_id "AF:1:69982045-69983502:69983626:69982045-69985232:69985428:-"; transcript_id "AF:1:69982045-69983502:69983626:69982045-69985232:69985428:-:alternative1";
1	hq_isoforms.fasta.no5merge.collapsed.gff	exon	69985232	69985428	.	-	.	gene_id "AF:1:69982045-69983502:69983626:69982045-69985232:69985428:-"; transcript_id "AF:1:69982045-69983502:69983626:69982045-69985232:69985428:-:alternative1";
1	hq_isoforms.fasta.no5merge.collapsed.gff	exon	69981945	69982045	.	-	.	gene_id "AF:1:69982045-69983502:69983626:69982045-69985235:69985408:-"; transcript_id "AF:1:69982045-69983502:69983626:69982045-69985235:69985408:-:alternative2";
1	hq_isoforms.fasta.no5merge.collapsed.gff	exon	69983502	69983626	.	-	.	gene_id "AF:1:69982045-69983502:69983626:69982045-69985235:69985408:-"; transcript_id "AF:1:69982045-69983502:69983626:69982045-69985235:69985408:-:alternative2";
1	hq_isoforms.fasta.no5merge.collapsed.gff	exon	69981945	69982045	.	-	.	gene_id "AF:1:69982045-69983502:69983626:69982045-69985235:69985408:-"; transcript_id "AF:1:69982045-69983502:69983626:69982045-69985235:69985408:-:alternative1";
1	hq_isoforms.fasta.no5merge.collapsed.gff	exon	69985235	69985408	.	-	.	gene_id "AF:1:69982045-69983502:69983626:69982045-69985235:69985408:-"; transcript_id "AF:1:69982045-69983502:69983626:69982045-69985235:69985408:-:alternative1";
1	hq_isoforms.fasta.no5merge.collapsed.gff	exon	70933736	70933836	.	-	.	gene_id "AF:1:70933836-70935673:70936062:70933836-70936147:70936281:-"; transcript_id "AF:1:70933836-70935673:70936062:70933836-70936147:70936281:-:alternative2";
1	hq_isoforms.fasta.no5merge.collapsed.gff	exon	70935673	70936062	.	-	.	gene_id "AF:1:70933836-70935673:70936062:70933836-70936147:70936281:-"; transcript_id "AF:1:70933836-70935673:70936062:70933836-70936147:70936281:-:alternative2";
1	hq_isoforms.fasta.no5merge.collapsed.gff	exon	70933736	70933836	.	-	.	gene_id "AF:1:70933836-70935673:70936062:70933836-70936147:70936281:-"; transcript_id "AF:1:70933836-70935673:70936062:70933836-70936147:70936281:-:alternative1";
1	hq_isoforms.fasta.no5merge.collapsed.gff	exon	70936147	70936281	.	-	.	gene_id "AF:1:70933836-70935673:70936062:70933836-70936147:70936281:-"; transcript_id "AF:1:70933836-70935673:70936062:70933836-70936147:70936281:-:alternative1";
1	hq_isoforms.fasta.no5merge.collapsed.gff	exon	70933736	70933836	.	-	.	gene_id "AF:1:70933836-70935673:70936062:70933836-70936147:70936263:-"; transcript_id "AF:1:70933836-70935673:70936062:70933836-70936147:70936263:-:alternative2";
1	hq_isoforms.fasta.no5merge.collapsed.gff	exon	70935673	70936062	.	-	.	gene_id "AF:1:70933836-70935673:70936062:70933836-70936147:70936263:-"; transcript_id "AF:1:70933836-70935673:70936062:70933836-70936147:70936263:-:alternative2";
1	hq_isoforms.fasta.no5merge.collapsed.gff	exon	70933736	70933836	.	-	.	gene_id "AF:1:70933836-70935673:70936062:70933836-70936147:70936263:-"; transcript_id "AF:1:70933836-70935673:70936062:70933836-70936147:70936263:-:alternative1";
1	hq_isoforms.fasta.no5merge.collapsed.gff	exon	70936147	70936263	.	-	.	gene_id "AF:1:70933836-70935673:70936062:70933836-70936147:70936263:-"; transcript_id "AF:1:70933836-70935673:70936062:70933836-70936147:70936263:-:alternative1";
1	hq_isoforms.fasta.no5merge.collapsed.gff	exon	70933736	70933836	.	-	.	gene_id "AF:1:70933836-70935673:70936062:70933836-70936151:70936402:-"; transcript_id "AF:1:70933836-70935673:70936062:70933836-70936151:70936402:-:alternative2";
1	hq_isoforms.fasta.no5merge.collapsed.gff	exon	70935673	70936062	.	-	.	gene_id "AF:1:70933836-70935673:70936062:70933836-70936151:70936402:-"; transcript_id "AF:1:70933836-70935673:70936062:70933836-70936151:70936402:-:alternative2";
1	hq_isoforms.fasta.no5merge.collapsed.gff	exon	70933736	70933836	.	-	.	gene_id "AF:1:70933836-70935673:70936062:70933836-70936151:70936402:-"; transcript_id "AF:1:70933836-70935673:70936062:70933836-70936151:70936402:-:alternative1";
1	hq_isoforms.fasta.no5merge.collapsed.gff	exon	70936151	70936402	.	-	.	gene_id "AF:1:70933836-70935673:70936062:70933836-70936151:70936402:-"; transcript_id "AF:1:70933836-70935673:70936062:70933836-70936151:70936402:-:alternative1";
1	hq_isoforms.fasta.no5merge.collapsed.gff	exon	70933736	70933836	.	-	.	gene_id "AF:1:70933836-70935673:70936062:70933836-70936216:70936278:-"; transcript_id "AF:1:70933836-70935673:70936062:70933836-70936216:70936278:-:alternative2";
1	hq_isoforms.fasta.no5merge.collapsed.gff	exon	70935673	70936062	.	-	.	gene_id "AF:1:70933836-70935673:70936062:70933836-70936216:70936278:-"; transcript_id "AF:1:70933836-70935673:70936062:70933836-70936216:70936278:-:alternative2";
1	hq_isoforms.fasta.no5merge.collapsed.gff	exon	70933736	70933836	.	-	.	gene_id "AF:1:70933836-70935673:70936062:70933836-70936216:70936278:-"; transcript_id "AF:1:70933836-70935673:70936062:70933836-70936216:70936278:-:alternative1";
1	hq_isoforms.fasta.no5merge.collapsed.gff	exon	70936216	70936278	.	-	.	gene_id "AF:1:70933836-70935673:70936062:70933836-70936216:70936278:-"; transcript_id "AF:1:70933836-70935673:70936062:70933836-70936216:70936278:-:alternative1";
1	hq_isoforms.fasta.no5merge.collapsed.gff	exon	70933736	70933836	.	-	.	gene_id "AF:1:70933836-70935673:70936055:70933836-70936147:70936281:-"; transcript_id "AF:1:70933836-70935673:70936055:70933836-70936147:70936281:-:alternative2";
1	hq_isoforms.fasta.no5merge.collapsed.gff	exon	70935673	70936055	.	-	.	gene_id "AF:1:70933836-70935673:70936055:70933836-70936147:70936281:-"; transcript_id "AF:1:70933836-70935673:70936055:70933836-70936147:70936281:-:alternative2";
1	hq_isoforms.fasta.no5merge.collapsed.gff	exon	70933736	70933836	.	-	.	gene_id "AF:1:70933836-70935673:70936055:70933836-70936147:70936281:-"; transcript_id "AF:1:70933836-70935673:70936055:70933836-70936147:70936281:-:alternative1";
1	hq_isoforms.fasta.no5merge.collapsed.gff	exon	70936147	70936281	.	-	.	gene_id "AF:1:70933836-70935673:70936055:70933836-70936147:70936281:-"; transcript_id "AF:1:70933836-70935673:70936055:70933836-70936147:70936281:-:alternative1";
1	hq_isoforms.fasta.no5merge.collapsed.gff	exon	70933736	70933836	.	-	.	gene_id "AF:1:70933836-70935673:70936055:70933836-70936147:70936263:-"; transcript_id "AF:1:70933836-70935673:70936055:70933836-70936147:70936263:-:alternative2";
1	hq_isoforms.fasta.no5merge.collapsed.gff	exon	70935673	70936055	.	-	.	gene_id "AF:1:70933836-70935673:70936055:70933836-70936147:70936263:-"; transcript_id "AF:1:70933836-70935673:70936055:70933836-70936147:70936263:-:alternative2";
1	hq_isoforms.fasta.no5merge.collapsed.gff	exon	70933736	70933836	.	-	.	gene_id "AF:1:70933836-70935673:70936055:70933836-70936147:70936263:-"; transcript_id "AF:1:70933836-70935673:70936055:70933836-70936147:70936263:-:alternative1";
1	hq_isoforms.fasta.no5merge.collapsed.gff	exon	70936147	70936263	.	-	.	gene_id "AF:1:70933836-70935673:70936055:70933836-70936147:70936263:-"; transcript_id "AF:1:70933836-70935673:70936055:70933836-70936147:70936263:-:alternative1";
1	hq_isoforms.fasta.no5merge.collapsed.gff	exon	70933736	70933836	.	-	.	gene_id "AF:1:70933836-70935673:70936055:70933836-70936151:70936402:-"; transcript_id "AF:1:70933836-70935673:70936055:70933836-70936151:70936402:-:alternative2";
1	hq_isoforms.fasta.no5merge.collapsed.gff	exon	70935673	70936055	.	-	.	gene_id "AF:1:70933836-70935673:70936055:70933836-70936151:70936402:-"; transcript_id "AF:1:70933836-70935673:70936055:70933836-70936151:70936402:-:alternative2";
1	hq_isoforms.fasta.no5merge.collapsed.gff	exon	70933736	70933836	.	-	.	gene_id "AF:1:70933836-70935673:70936055:70933836-70936151:70936402:-"; transcript_id "AF:1:70933836-70935673:70936055:70933836-70936151:70936402:-:alternative1";
1	hq_isoforms.fasta.no5merge.collapsed.gff	exon	70936151	70936402	.	-	.	gene_id "AF:1:70933836-70935673:70936055:70933836-70936151:70936402:-"; transcript_id "AF:1:70933836-70935673:70936055:70933836-70936151:70936402:-:alternative1";
1	hq_isoforms.fasta.no5merge.collapsed.gff	exon	70933736	70933836	.	-	.	gene_id "AF:1:70933836-70935673:70936055:70933836-70936216:70936278:-"; transcript_id "AF:1:70933836-70935673:70936055:70933836-70936216:70936278:-:alternative2";
1	hq_isoforms.fasta.no5merge.collapsed.gff	exon	70935673	70936055	.	-	.	gene_id "AF:1:70933836-70935673:70936055:70933836-70936216:70936278:-"; transcript_id "AF:1:70933836-70935673:70936055:70933836-70936216:70936278:-:alternative2";
1	hq_isoforms.fasta.no5merge.collapsed.gff	exon	70933736	70933836	.	-	.	gene_id "AF:1:70933836-70935673:70936055:70933836-70936216:70936278:-"; transcript_id "AF:1:70933836-70935673:70936055:70933836-70936216:70936278:-:alternative1";
1	hq_isoforms.fasta.no5merge.collapsed.gff	exon	70936216	70936278	.	-	.	gene_id "AF:1:70933836-70935673:70936055:70933836-70936216:70936278:-"; transcript_id "AF:1:70933836-70935673:70936055:70933836-70936216:70936278:-:alternative1";
1	hq_isoforms.fasta.no5merge.collapsed.gff	exon	71508482	71508582	.	-	.	gene_id "AF:1:71508582-71536535:71536604:71508582-71547630:71547727:-"; transcript_id "AF:1:71508582-71536535:71536604:71508582-71547630:71547727:-:alternative2";
1	hq_isoforms.fasta.no5merge.collapsed.gff	exon	71536535	71536604	.	-	.	gene_id "AF:1:71508582-71536535:71536604:71508582-71547630:71547727:-"; transcript_id "AF:1:71508582-71536535:71536604:71508582-71547630:71547727:-:alternative2";
1	hq_isoforms.fasta.no5merge.collapsed.gff	exon	71508482	71508582	.	-	.	gene_id "AF:1:71508582-71536535:71536604:71508582-71547630:71547727:-"; transcript_id "AF:1:71508582-71536535:71536604:71508582-71547630:71547727:-:alternative1";
1	hq_isoforms.fasta.no5merge.collapsed.gff	exon	71547630	71547727	.	-	.	gene_id "AF:1:71508582-71536535:71536604:71508582-71547630:71547727:-"; transcript_id "AF:1:71508582-71536535:71536604:71508582-71547630:71547727:-:alternative1";
1	hq_isoforms.fasta.no5merge.collapsed.gff	exon	72227043	72227143	.	-	.	gene_id "AF:1:72227143-72234867:72235028:72227143-72236090:72237551:-"; transcript_id "AF:1:72227143-72234867:72235028:72227143-72236090:72237551:-:alternative2";
1	hq_isoforms.fasta.no5merge.collapsed.gff	exon	72234867	72235028	.	-	.	gene_id "AF:1:72227143-72234867:72235028:72227143-72236090:72237551:-"; transcript_id "AF:1:72227143-72234867:72235028:72227143-72236090:72237551:-:alternative2";
1	hq_isoforms.fasta.no5merge.collapsed.gff	exon	72227043	72227143	.	-	.	gene_id "AF:1:72227143-72234867:72235028:72227143-72236090:72237551:-"; transcript_id "AF:1:72227143-72234867:72235028:72227143-72236090:72237551:-:alternative1";
1	hq_isoforms.fasta.no5merge.collapsed.gff	exon	72236090	72237551	.	-	.	gene_id "AF:1:72227143-72234867:72235028:72227143-72236090:72237551:-"; transcript_id "AF:1:72227143-72234867:72235028:72227143-72236090:72237551:-:alternative1";
1	hq_isoforms.fasta.no5merge.collapsed.gff	exon	72227043	72227143	.	-	.	gene_id "AF:1:72227143-72234867:72235028:72227143-72236090:72239738:-"; transcript_id "AF:1:72227143-72234867:72235028:72227143-72236090:72239738:-:alternative2";
1	hq_isoforms.fasta.no5merge.collapsed.gff	exon	72234867	72235028	.	-	.	gene_id "AF:1:72227143-72234867:72235028:72227143-72236090:72239738:-"; transcript_id "AF:1:72227143-72234867:72235028:72227143-72236090:72239738:-:alternative2";
1	hq_isoforms.fasta.no5merge.collapsed.gff	exon	72227043	72227143	.	-	.	gene_id "AF:1:72227143-72234867:72235028:72227143-72236090:72239738:-"; transcript_id "AF:1:72227143-72234867:72235028:72227143-72236090:72239738:-:alternative1";
1	hq_isoforms.fasta.no5merge.collapsed.gff	exon	72236090	72239738	.	-	.	gene_id "AF:1:72227143-72234867:72235028:72227143-72236090:72239738:-"; transcript_id "AF:1:72227143-72234867:72235028:72227143-72236090:72239738:-:alternative1";
1	hq_isoforms.fasta.no5merge.collapsed.gff	exon	72379766	72379866	.	-	.	gene_id "AF:1:72379866-72383250:72383460:72379866-72383753:72383928:-"; transcript_id "AF:1:72379866-72383250:72383460:72379866-72383753:72383928:-:alternative2";
1	hq_isoforms.fasta.no5merge.collapsed.gff	exon	72383250	72383460	.	-	.	gene_id "AF:1:72379866-72383250:72383460:72379866-72383753:72383928:-"; transcript_id "AF:1:72379866-72383250:72383460:72379866-72383753:72383928:-:alternative2";
1	hq_isoforms.fasta.no5merge.collapsed.gff	exon	72379766	72379866	.	-	.	gene_id "AF:1:72379866-72383250:72383460:72379866-72383753:72383928:-"; transcript_id "AF:1:72379866-72383250:72383460:72379866-72383753:72383928:-:alternative1";
1	hq_isoforms.fasta.no5merge.collapsed.gff	exon	72383753	72383928	.	-	.	gene_id "AF:1:72379866-72383250:72383460:72379866-72383753:72383928:-"; transcript_id "AF:1:72379866-72383250:72383460:72379866-72383753:72383928:-:alternative1";
1	hq_isoforms.fasta.no5merge.collapsed.gff	exon	72379766	72379866	.	-	.	gene_id "AF:1:72379866-72383250:72383510:72379866-72383753:72383928:-"; transcript_id "AF:1:72379866-72383250:72383510:72379866-72383753:72383928:-:alternative2";
1	hq_isoforms.fasta.no5merge.collapsed.gff	exon	72383250	72383510	.	-	.	gene_id "AF:1:72379866-72383250:72383510:72379866-72383753:72383928:-"; transcript_id "AF:1:72379866-72383250:72383510:72379866-72383753:72383928:-:alternative2";
1	hq_isoforms.fasta.no5merge.collapsed.gff	exon	72379766	72379866	.	-	.	gene_id "AF:1:72379866-72383250:72383510:72379866-72383753:72383928:-"; transcript_id "AF:1:72379866-72383250:72383510:72379866-72383753:72383928:-:alternative1";
1	hq_isoforms.fasta.no5merge.collapsed.gff	exon	72383753	72383928	.	-	.	gene_id "AF:1:72379866-72383250:72383510:72379866-72383753:72383928:-"; transcript_id "AF:1:72379866-72383250:72383510:72379866-72383753:72383928:-:alternative1";
1	hq_isoforms.fasta.no5merge.collapsed.gff	exon	72379766	72379866	.	-	.	gene_id "AF:1:72379866-72383250:72383553:72379866-72383753:72383928:-"; transcript_id "AF:1:72379866-72383250:72383553:72379866-72383753:72383928:-:alternative2";
1	hq_isoforms.fasta.no5merge.collapsed.gff	exon	72383250	72383553	.	-	.	gene_id "AF:1:72379866-72383250:72383553:72379866-72383753:72383928:-"; transcript_id "AF:1:72379866-72383250:72383553:72379866-72383753:72383928:-:alternative2";
1	hq_isoforms.fasta.no5merge.collapsed.gff	exon	72379766	72379866	.	-	.	gene_id "AF:1:72379866-72383250:72383553:72379866-72383753:72383928:-"; transcript_id "AF:1:72379866-72383250:72383553:72379866-72383753:72383928:-:alternative1";
1	hq_isoforms.fasta.no5merge.collapsed.gff	exon	72383753	72383928	.	-	.	gene_id "AF:1:72379866-72383250:72383553:72379866-72383753:72383928:-"; transcript_id "AF:1:72379866-72383250:72383553:72379866-72383753:72383928:-:alternative1";
1	hq_isoforms.fasta.no5merge.collapsed.gff	exon	72379766	72379866	.	-	.	gene_id "AF:1:72379866-72383250:72383433:72379866-72383753:72383928:-"; transcript_id "AF:1:72379866-72383250:72383433:72379866-72383753:72383928:-:alternative2";
1	hq_isoforms.fasta.no5merge.collapsed.gff	exon	72383250	72383433	.	-	.	gene_id "AF:1:72379866-72383250:72383433:72379866-72383753:72383928:-"; transcript_id "AF:1:72379866-72383250:72383433:72379866-72383753:72383928:-:alternative2";
1	hq_isoforms.fasta.no5merge.collapsed.gff	exon	72379766	72379866	.	-	.	gene_id "AF:1:72379866-72383250:72383433:72379866-72383753:72383928:-"; transcript_id "AF:1:72379866-72383250:72383433:72379866-72383753:72383928:-:alternative1";
1	hq_isoforms.fasta.no5merge.collapsed.gff	exon	72383753	72383928	.	-	.	gene_id "AF:1:72379866-72383250:72383433:72379866-72383753:72383928:-"; transcript_id "AF:1:72379866-72383250:72383433:72379866-72383753:72383928:-:alternative1";
1	hq_isoforms.fasta.no5merge.collapsed.gff	exon	72379766	72379866	.	-	.	gene_id "AF:1:72379866-72383250:72383263:72379866-72383753:72383928:-"; transcript_id "AF:1:72379866-72383250:72383263:72379866-72383753:72383928:-:alternative2";
1	hq_isoforms.fasta.no5merge.collapsed.gff	exon	72383250	72383263	.	-	.	gene_id "AF:1:72379866-72383250:72383263:72379866-72383753:72383928:-"; transcript_id "AF:1:72379866-72383250:72383263:72379866-72383753:72383928:-:alternative2";
1	hq_isoforms.fasta.no5merge.collapsed.gff	exon	72379766	72379866	.	-	.	gene_id "AF:1:72379866-72383250:72383263:72379866-72383753:72383928:-"; transcript_id "AF:1:72379866-72383250:72383263:72379866-72383753:72383928:-:alternative1";
1	hq_isoforms.fasta.no5merge.collapsed.gff	exon	72383753	72383928	.	-	.	gene_id "AF:1:72379866-72383250:72383263:72379866-72383753:72383928:-"; transcript_id "AF:1:72379866-72383250:72383263:72379866-72383753:72383928:-:alternative1";
1	hq_isoforms.fasta.no5merge.collapsed.gff	exon	72379766	72379866	.	-	.	gene_id "AF:1:72379866-72383250:72383504:72379866-72383753:72383928:-"; transcript_id "AF:1:72379866-72383250:72383504:72379866-72383753:72383928:-:alternative2";
1	hq_isoforms.fasta.no5merge.collapsed.gff	exon	72383250	72383504	.	-	.	gene_id "AF:1:72379866-72383250:72383504:72379866-72383753:72383928:-"; transcript_id "AF:1:72379866-72383250:72383504:72379866-72383753:72383928:-:alternative2";
1	hq_isoforms.fasta.no5merge.collapsed.gff	exon	72379766	72379866	.	-	.	gene_id "AF:1:72379866-72383250:72383504:72379866-72383753:72383928:-"; transcript_id "AF:1:72379866-72383250:72383504:72379866-72383753:72383928:-:alternative1";
1	hq_isoforms.fasta.no5merge.collapsed.gff	exon	72383753	72383928	.	-	.	gene_id "AF:1:72379866-72383250:72383504:72379866-72383753:72383928:-"; transcript_id "AF:1:72379866-72383250:72383504:72379866-72383753:72383928:-:alternative1";
1	hq_isoforms.fasta.no5merge.collapsed.gff	exon	72379766	72379866	.	-	.	gene_id "AF:1:72379866-72383250:72383522:72379866-72383753:72383928:-"; transcript_id "AF:1:72379866-72383250:72383522:72379866-72383753:72383928:-:alternative2";
1	hq_isoforms.fasta.no5merge.collapsed.gff	exon	72383250	72383522	.	-	.	gene_id "AF:1:72379866-72383250:72383522:72379866-72383753:72383928:-"; transcript_id "AF:1:72379866-72383250:72383522:72379866-72383753:72383928:-:alternative2";
1	hq_isoforms.fasta.no5merge.collapsed.gff	exon	72379766	72379866	.	-	.	gene_id "AF:1:72379866-72383250:72383522:72379866-72383753:72383928:-"; transcript_id "AF:1:72379866-72383250:72383522:72379866-72383753:72383928:-:alternative1";
1	hq_isoforms.fasta.no5merge.collapsed.gff	exon	72383753	72383928	.	-	.	gene_id "AF:1:72379866-72383250:72383522:72379866-72383753:72383928:-"; transcript_id "AF:1:72379866-72383250:72383522:72379866-72383753:72383928:-:alternative1";
1	hq_isoforms.fasta.no5merge.collapsed.gff	exon	72379766	72379866	.	-	.	gene_id "AF:1:72379866-72383250:72383505:72379866-72383753:72383928:-"; transcript_id "AF:1:72379866-72383250:72383505:72379866-72383753:72383928:-:alternative2";
1	hq_isoforms.fasta.no5merge.collapsed.gff	exon	72383250	72383505	.	-	.	gene_id "AF:1:72379866-72383250:72383505:72379866-72383753:72383928:-"; transcript_id "AF:1:72379866-72383250:72383505:72379866-72383753:72383928:-:alternative2";
1	hq_isoforms.fasta.no5merge.collapsed.gff	exon	72379766	72379866	.	-	.	gene_id "AF:1:72379866-72383250:72383505:72379866-72383753:72383928:-"; transcript_id "AF:1:72379866-72383250:72383505:72379866-72383753:72383928:-:alternative1";
1	hq_isoforms.fasta.no5merge.collapsed.gff	exon	72383753	72383928	.	-	.	gene_id "AF:1:72379866-72383250:72383505:72379866-72383753:72383928:-"; transcript_id "AF:1:72379866-72383250:72383505:72379866-72383753:72383928:-:alternative1";
1	hq_isoforms.fasta.no5merge.collapsed.gff	exon	72379766	72379866	.	-	.	gene_id "AF:1:72379866-72383250:72383551:72379866-72383753:72383928:-"; transcript_id "AF:1:72379866-72383250:72383551:72379866-72383753:72383928:-:alternative2";
1	hq_isoforms.fasta.no5merge.collapsed.gff	exon	72383250	72383551	.	-	.	gene_id "AF:1:72379866-72383250:72383551:72379866-72383753:72383928:-"; transcript_id "AF:1:72379866-72383250:72383551:72379866-72383753:72383928:-:alternative2";
1	hq_isoforms.fasta.no5merge.collapsed.gff	exon	72379766	72379866	.	-	.	gene_id "AF:1:72379866-72383250:72383551:72379866-72383753:72383928:-"; transcript_id "AF:1:72379866-72383250:72383551:72379866-72383753:72383928:-:alternative1";
1	hq_isoforms.fasta.no5merge.collapsed.gff	exon	72383753	72383928	.	-	.	gene_id "AF:1:72379866-72383250:72383551:72379866-72383753:72383928:-"; transcript_id "AF:1:72379866-72383250:72383551:72379866-72383753:72383928:-:alternative1";
1	hq_isoforms.fasta.no5merge.collapsed.gff	exon	72403219	72403319	.	-	.	gene_id "AF:1:72403319-72405098:72405164:72403319-72410688:72410885:-"; transcript_id "AF:1:72403319-72405098:72405164:72403319-72410688:72410885:-:alternative2";
1	hq_isoforms.fasta.no5merge.collapsed.gff	exon	72405098	72405164	.	-	.	gene_id "AF:1:72403319-72405098:72405164:72403319-72410688:72410885:-"; transcript_id "AF:1:72403319-72405098:72405164:72403319-72410688:72410885:-:alternative2";
1	hq_isoforms.fasta.no5merge.collapsed.gff	exon	72403219	72403319	.	-	.	gene_id "AF:1:72403319-72405098:72405164:72403319-72410688:72410885:-"; transcript_id "AF:1:72403319-72405098:72405164:72403319-72410688:72410885:-:alternative1";
1	hq_isoforms.fasta.no5merge.collapsed.gff	exon	72410688	72410885	.	-	.	gene_id "AF:1:72403319-72405098:72405164:72403319-72410688:72410885:-"; transcript_id "AF:1:72403319-72405098:72405164:72403319-72410688:72410885:-:alternative1";
1	hq_isoforms.fasta.no5merge.collapsed.gff	exon	72614883	72614983	.	-	.	gene_id "AF:1:72614983-72620211:72620475:72614983-72633838:72634261:-"; transcript_id "AF:1:72614983-72620211:72620475:72614983-72633838:72634261:-:alternative2";
1	hq_isoforms.fasta.no5merge.collapsed.gff	exon	72620211	72620475	.	-	.	gene_id "AF:1:72614983-72620211:72620475:72614983-72633838:72634261:-"; transcript_id "AF:1:72614983-72620211:72620475:72614983-72633838:72634261:-:alternative2";
1	hq_isoforms.fasta.no5merge.collapsed.gff	exon	72614883	72614983	.	-	.	gene_id "AF:1:72614983-72620211:72620475:72614983-72633838:72634261:-"; transcript_id "AF:1:72614983-72620211:72620475:72614983-72633838:72634261:-:alternative1";
1	hq_isoforms.fasta.no5merge.collapsed.gff	exon	72633838	72634261	.	-	.	gene_id "AF:1:72614983-72620211:72620475:72614983-72633838:72634261:-"; transcript_id "AF:1:72614983-72620211:72620475:72614983-72633838:72634261:-:alternative1";
1	hq_isoforms.fasta.no5merge.collapsed.gff	exon	72620374	72620474	.	-	.	gene_id "AF:1:72620474-72634162:72634490:72620474-72634755:72634896:-"; transcript_id "AF:1:72620474-72634162:72634490:72620474-72634755:72634896:-:alternative2";
1	hq_isoforms.fasta.no5merge.collapsed.gff	exon	72634162	72634490	.	-	.	gene_id "AF:1:72620474-72634162:72634490:72620474-72634755:72634896:-"; transcript_id "AF:1:72620474-72634162:72634490:72620474-72634755:72634896:-:alternative2";
1	hq_isoforms.fasta.no5merge.collapsed.gff	exon	72620374	72620474	.	-	.	gene_id "AF:1:72620474-72634162:72634490:72620474-72634755:72634896:-"; transcript_id "AF:1:72620474-72634162:72634490:72620474-72634755:72634896:-:alternative1";
1	hq_isoforms.fasta.no5merge.collapsed.gff	exon	72634755	72634896	.	-	.	gene_id "AF:1:72620474-72634162:72634490:72620474-72634755:72634896:-"; transcript_id "AF:1:72620474-72634162:72634490:72620474-72634755:72634896:-:alternative1";
1	hq_isoforms.fasta.no5merge.collapsed.gff	exon	72620374	72620474	.	-	.	gene_id "AF:1:72620474-72634162:72634490:72620474-72634633:72634698:-"; transcript_id "AF:1:72620474-72634162:72634490:72620474-72634633:72634698:-:alternative2";
1	hq_isoforms.fasta.no5merge.collapsed.gff	exon	72634162	72634490	.	-	.	gene_id "AF:1:72620474-72634162:72634490:72620474-72634633:72634698:-"; transcript_id "AF:1:72620474-72634162:72634490:72620474-72634633:72634698:-:alternative2";
1	hq_isoforms.fasta.no5merge.collapsed.gff	exon	72620374	72620474	.	-	.	gene_id "AF:1:72620474-72634162:72634490:72620474-72634633:72634698:-"; transcript_id "AF:1:72620474-72634162:72634490:72620474-72634633:72634698:-:alternative1";
1	hq_isoforms.fasta.no5merge.collapsed.gff	exon	72634633	72634698	.	-	.	gene_id "AF:1:72620474-72634162:72634490:72620474-72634633:72634698:-"; transcript_id "AF:1:72620474-72634162:72634490:72620474-72634633:72634698:-:alternative1";
1	hq_isoforms.fasta.no5merge.collapsed.gff	exon	72620374	72620474	.	-	.	gene_id "AF:1:72620474-72634162:72634490:72620474-72634633:72634701:-"; transcript_id "AF:1:72620474-72634162:72634490:72620474-72634633:72634701:-:alternative2";
1	hq_isoforms.fasta.no5merge.collapsed.gff	exon	72634162	72634490	.	-	.	gene_id "AF:1:72620474-72634162:72634490:72620474-72634633:72634701:-"; transcript_id "AF:1:72620474-72634162:72634490:72620474-72634633:72634701:-:alternative2";
1	hq_isoforms.fasta.no5merge.collapsed.gff	exon	72620374	72620474	.	-	.	gene_id "AF:1:72620474-72634162:72634490:72620474-72634633:72634701:-"; transcript_id "AF:1:72620474-72634162:72634490:72620474-72634633:72634701:-:alternative1";
1	hq_isoforms.fasta.no5merge.collapsed.gff	exon	72634633	72634701	.	-	.	gene_id "AF:1:72620474-72634162:72634490:72620474-72634633:72634701:-"; transcript_id "AF:1:72620474-72634162:72634490:72620474-72634633:72634701:-:alternative1";
1	hq_isoforms.fasta.no5merge.collapsed.gff	exon	72620374	72620474	.	-	.	gene_id "AF:1:72620474-72634633:72634698:72620474-72634755:72634896:-"; transcript_id "AF:1:72620474-72634633:72634698:72620474-72634755:72634896:-:alternative2";
1	hq_isoforms.fasta.no5merge.collapsed.gff	exon	72634633	72634698	.	-	.	gene_id "AF:1:72620474-72634633:72634698:72620474-72634755:72634896:-"; transcript_id "AF:1:72620474-72634633:72634698:72620474-72634755:72634896:-:alternative2";
1	hq_isoforms.fasta.no5merge.collapsed.gff	exon	72620374	72620474	.	-	.	gene_id "AF:1:72620474-72634633:72634698:72620474-72634755:72634896:-"; transcript_id "AF:1:72620474-72634633:72634698:72620474-72634755:72634896:-:alternative1";
1	hq_isoforms.fasta.no5merge.collapsed.gff	exon	72634755	72634896	.	-	.	gene_id "AF:1:72620474-72634633:72634698:72620474-72634755:72634896:-"; transcript_id "AF:1:72620474-72634633:72634698:72620474-72634755:72634896:-:alternative1";
1	hq_isoforms.fasta.no5merge.collapsed.gff	exon	72620374	72620474	.	-	.	gene_id "AF:1:72620474-72634633:72634701:72620474-72634755:72634896:-"; transcript_id "AF:1:72620474-72634633:72634701:72620474-72634755:72634896:-:alternative2";
1	hq_isoforms.fasta.no5merge.collapsed.gff	exon	72634633	72634701	.	-	.	gene_id "AF:1:72620474-72634633:72634701:72620474-72634755:72634896:-"; transcript_id "AF:1:72620474-72634633:72634701:72620474-72634755:72634896:-:alternative2";
1	hq_isoforms.fasta.no5merge.collapsed.gff	exon	72620374	72620474	.	-	.	gene_id "AF:1:72620474-72634633:72634701:72620474-72634755:72634896:-"; transcript_id "AF:1:72620474-72634633:72634701:72620474-72634755:72634896:-:alternative1";
1	hq_isoforms.fasta.no5merge.collapsed.gff	exon	72634755	72634896	.	-	.	gene_id "AF:1:72620474-72634633:72634701:72620474-72634755:72634896:-"; transcript_id "AF:1:72620474-72634633:72634701:72620474-72634755:72634896:-:alternative1";
1	hq_isoforms.fasta.no5merge.collapsed.gff	exon	73279245	73279345	.	-	.	gene_id "AF:1:73279345-73336050:73336337:73279345-73336403:73336536:-"; transcript_id "AF:1:73279345-73336050:73336337:73279345-73336403:73336536:-:alternative2";
1	hq_isoforms.fasta.no5merge.collapsed.gff	exon	73336050	73336337	.	-	.	gene_id "AF:1:73279345-73336050:73336337:73279345-73336403:73336536:-"; transcript_id "AF:1:73279345-73336050:73336337:73279345-73336403:73336536:-:alternative2";
1	hq_isoforms.fasta.no5merge.collapsed.gff	exon	73279245	73279345	.	-	.	gene_id "AF:1:73279345-73336050:73336337:73279345-73336403:73336536:-"; transcript_id "AF:1:73279345-73336050:73336337:73279345-73336403:73336536:-:alternative1";
1	hq_isoforms.fasta.no5merge.collapsed.gff	exon	73336403	73336536	.	-	.	gene_id "AF:1:73279345-73336050:73336337:73279345-73336403:73336536:-"; transcript_id "AF:1:73279345-73336050:73336337:73279345-73336403:73336536:-:alternative1";
1	hq_isoforms.fasta.no5merge.collapsed.gff	exon	73279245	73279345	.	-	.	gene_id "AF:1:73279345-73336050:73336337:73279345-73336403:73336534:-"; transcript_id "AF:1:73279345-73336050:73336337:73279345-73336403:73336534:-:alternative2";
1	hq_isoforms.fasta.no5merge.collapsed.gff	exon	73336050	73336337	.	-	.	gene_id "AF:1:73279345-73336050:73336337:73279345-73336403:73336534:-"; transcript_id "AF:1:73279345-73336050:73336337:73279345-73336403:73336534:-:alternative2";
1	hq_isoforms.fasta.no5merge.collapsed.gff	exon	73279245	73279345	.	-	.	gene_id "AF:1:73279345-73336050:73336337:73279345-73336403:73336534:-"; transcript_id "AF:1:73279345-73336050:73336337:73279345-73336403:73336534:-:alternative1";
1	hq_isoforms.fasta.no5merge.collapsed.gff	exon	73336403	73336534	.	-	.	gene_id "AF:1:73279345-73336050:73336337:73279345-73336403:73336534:-"; transcript_id "AF:1:73279345-73336050:73336337:73279345-73336403:73336534:-:alternative1";
1	hq_isoforms.fasta.no5merge.collapsed.gff	exon	73279245	73279345	.	-	.	gene_id "AF:1:73279345-73336050:73336337:73279345-73336403:73336485:-"; transcript_id "AF:1:73279345-73336050:73336337:73279345-73336403:73336485:-:alternative2";
1	hq_isoforms.fasta.no5merge.collapsed.gff	exon	73336050	73336337	.	-	.	gene_id "AF:1:73279345-73336050:73336337:73279345-73336403:73336485:-"; transcript_id "AF:1:73279345-73336050:73336337:73279345-73336403:73336485:-:alternative2";
1	hq_isoforms.fasta.no5merge.collapsed.gff	exon	73279245	73279345	.	-	.	gene_id "AF:1:73279345-73336050:73336337:73279345-73336403:73336485:-"; transcript_id "AF:1:73279345-73336050:73336337:73279345-73336403:73336485:-:alternative1";
1	hq_isoforms.fasta.no5merge.collapsed.gff	exon	73336403	73336485	.	-	.	gene_id "AF:1:73279345-73336050:73336337:73279345-73336403:73336485:-"; transcript_id "AF:1:73279345-73336050:73336337:73279345-73336403:73336485:-:alternative1";
1	hq_isoforms.fasta.no5merge.collapsed.gff	exon	73279245	73279345	.	-	.	gene_id "AF:1:73279345-73336050:73336337:73279345-73336403:73336491:-"; transcript_id "AF:1:73279345-73336050:73336337:73279345-73336403:73336491:-:alternative2";
1	hq_isoforms.fasta.no5merge.collapsed.gff	exon	73336050	73336337	.	-	.	gene_id "AF:1:73279345-73336050:73336337:73279345-73336403:73336491:-"; transcript_id "AF:1:73279345-73336050:73336337:73279345-73336403:73336491:-:alternative2";
1	hq_isoforms.fasta.no5merge.collapsed.gff	exon	73279245	73279345	.	-	.	gene_id "AF:1:73279345-73336050:73336337:73279345-73336403:73336491:-"; transcript_id "AF:1:73279345-73336050:73336337:73279345-73336403:73336491:-:alternative1";
1	hq_isoforms.fasta.no5merge.collapsed.gff	exon	73336403	73336491	.	-	.	gene_id "AF:1:73279345-73336050:73336337:73279345-73336403:73336491:-"; transcript_id "AF:1:73279345-73336050:73336337:73279345-73336403:73336491:-:alternative1";
1	hq_isoforms.fasta.no5merge.collapsed.gff	exon	73279245	73279345	.	-	.	gene_id "AF:1:73279345-73336050:73336337:73279345-73336403:73336517:-"; transcript_id "AF:1:73279345-73336050:73336337:73279345-73336403:73336517:-:alternative2";
1	hq_isoforms.fasta.no5merge.collapsed.gff	exon	73336050	73336337	.	-	.	gene_id "AF:1:73279345-73336050:73336337:73279345-73336403:73336517:-"; transcript_id "AF:1:73279345-73336050:73336337:73279345-73336403:73336517:-:alternative2";
1	hq_isoforms.fasta.no5merge.collapsed.gff	exon	73279245	73279345	.	-	.	gene_id "AF:1:73279345-73336050:73336337:73279345-73336403:73336517:-"; transcript_id "AF:1:73279345-73336050:73336337:73279345-73336403:73336517:-:alternative1";
1	hq_isoforms.fasta.no5merge.collapsed.gff	exon	73336403	73336517	.	-	.	gene_id "AF:1:73279345-73336050:73336337:73279345-73336403:73336517:-"; transcript_id "AF:1:73279345-73336050:73336337:73279345-73336403:73336517:-:alternative1";
1	hq_isoforms.fasta.no5merge.collapsed.gff	exon	73279245	73279345	.	-	.	gene_id "AF:1:73279345-73336050:73336337:73279345-73336403:73336520:-"; transcript_id "AF:1:73279345-73336050:73336337:73279345-73336403:73336520:-:alternative2";
1	hq_isoforms.fasta.no5merge.collapsed.gff	exon	73336050	73336337	.	-	.	gene_id "AF:1:73279345-73336050:73336337:73279345-73336403:73336520:-"; transcript_id "AF:1:73279345-73336050:73336337:73279345-73336403:73336520:-:alternative2";
1	hq_isoforms.fasta.no5merge.collapsed.gff	exon	73279245	73279345	.	-	.	gene_id "AF:1:73279345-73336050:73336337:73279345-73336403:73336520:-"; transcript_id "AF:1:73279345-73336050:73336337:73279345-73336403:73336520:-:alternative1";
1	hq_isoforms.fasta.no5merge.collapsed.gff	exon	73336403	73336520	.	-	.	gene_id "AF:1:73279345-73336050:73336337:73279345-73336403:73336520:-"; transcript_id "AF:1:73279345-73336050:73336337:73279345-73336403:73336520:-:alternative1";
1	hq_isoforms.fasta.no5merge.collapsed.gff	exon	73279245	73279345	.	-	.	gene_id "AF:1:73279345-73336050:73336337:73279345-73336403:73336535:-"; transcript_id "AF:1:73279345-73336050:73336337:73279345-73336403:73336535:-:alternative2";
1	hq_isoforms.fasta.no5merge.collapsed.gff	exon	73336050	73336337	.	-	.	gene_id "AF:1:73279345-73336050:73336337:73279345-73336403:73336535:-"; transcript_id "AF:1:73279345-73336050:73336337:73279345-73336403:73336535:-:alternative2";
1	hq_isoforms.fasta.no5merge.collapsed.gff	exon	73279245	73279345	.	-	.	gene_id "AF:1:73279345-73336050:73336337:73279345-73336403:73336535:-"; transcript_id "AF:1:73279345-73336050:73336337:73279345-73336403:73336535:-:alternative1";
1	hq_isoforms.fasta.no5merge.collapsed.gff	exon	73336403	73336535	.	-	.	gene_id "AF:1:73279345-73336050:73336337:73279345-73336403:73336535:-"; transcript_id "AF:1:73279345-73336050:73336337:73279345-73336403:73336535:-:alternative1";
1	hq_isoforms.fasta.no5merge.collapsed.gff	exon	73279245	73279345	.	-	.	gene_id "AF:1:73279345-73336050:73336337:73279345-73336403:73336523:-"; transcript_id "AF:1:73279345-73336050:73336337:73279345-73336403:73336523:-:alternative2";
1	hq_isoforms.fasta.no5merge.collapsed.gff	exon	73336050	73336337	.	-	.	gene_id "AF:1:73279345-73336050:73336337:73279345-73336403:73336523:-"; transcript_id "AF:1:73279345-73336050:73336337:73279345-73336403:73336523:-:alternative2";
1	hq_isoforms.fasta.no5merge.collapsed.gff	exon	73279245	73279345	.	-	.	gene_id "AF:1:73279345-73336050:73336337:73279345-73336403:73336523:-"; transcript_id "AF:1:73279345-73336050:73336337:73279345-73336403:73336523:-:alternative1";
1	hq_isoforms.fasta.no5merge.collapsed.gff	exon	73336403	73336523	.	-	.	gene_id "AF:1:73279345-73336050:73336337:73279345-73336403:73336523:-"; transcript_id "AF:1:73279345-73336050:73336337:73279345-73336403:73336523:-:alternative1";
1	hq_isoforms.fasta.no5merge.collapsed.gff	exon	73279245	73279345	.	-	.	gene_id "AF:1:73279345-73336050:73336337:73279345-73336403:73336538:-"; transcript_id "AF:1:73279345-73336050:73336337:73279345-73336403:73336538:-:alternative2";
1	hq_isoforms.fasta.no5merge.collapsed.gff	exon	73336050	73336337	.	-	.	gene_id "AF:1:73279345-73336050:73336337:73279345-73336403:73336538:-"; transcript_id "AF:1:73279345-73336050:73336337:73279345-73336403:73336538:-:alternative2";
1	hq_isoforms.fasta.no5merge.collapsed.gff	exon	73279245	73279345	.	-	.	gene_id "AF:1:73279345-73336050:73336337:73279345-73336403:73336538:-"; transcript_id "AF:1:73279345-73336050:73336337:73279345-73336403:73336538:-:alternative1";
1	hq_isoforms.fasta.no5merge.collapsed.gff	exon	73336403	73336538	.	-	.	gene_id "AF:1:73279345-73336050:73336337:73279345-73336403:73336538:-"; transcript_id "AF:1:73279345-73336050:73336337:73279345-73336403:73336538:-:alternative1";
1	hq_isoforms.fasta.no5merge.collapsed.gff	exon	73279245	73279345	.	-	.	gene_id "AF:1:73279345-73281228:73281319:73279345-73336403:73336536:-"; transcript_id "AF:1:73279345-73281228:73281319:73279345-73336403:73336536:-:alternative2";
1	hq_isoforms.fasta.no5merge.collapsed.gff	exon	73281228	73281319	.	-	.	gene_id "AF:1:73279345-73281228:73281319:73279345-73336403:73336536:-"; transcript_id "AF:1:73279345-73281228:73281319:73279345-73336403:73336536:-:alternative2";
1	hq_isoforms.fasta.no5merge.collapsed.gff	exon	73279245	73279345	.	-	.	gene_id "AF:1:73279345-73281228:73281319:73279345-73336403:73336536:-"; transcript_id "AF:1:73279345-73281228:73281319:73279345-73336403:73336536:-:alternative1";
1	hq_isoforms.fasta.no5merge.collapsed.gff	exon	73336403	73336536	.	-	.	gene_id "AF:1:73279345-73281228:73281319:73279345-73336403:73336536:-"; transcript_id "AF:1:73279345-73281228:73281319:73279345-73336403:73336536:-:alternative1";
1	hq_isoforms.fasta.no5merge.collapsed.gff	exon	73279245	73279345	.	-	.	gene_id "AF:1:73279345-73281228:73281319:73279345-73336050:73336481:-"; transcript_id "AF:1:73279345-73281228:73281319:73279345-73336050:73336481:-:alternative2";
1	hq_isoforms.fasta.no5merge.collapsed.gff	exon	73281228	73281319	.	-	.	gene_id "AF:1:73279345-73281228:73281319:73279345-73336050:73336481:-"; transcript_id "AF:1:73279345-73281228:73281319:73279345-73336050:73336481:-:alternative2";
1	hq_isoforms.fasta.no5merge.collapsed.gff	exon	73279245	73279345	.	-	.	gene_id "AF:1:73279345-73281228:73281319:73279345-73336050:73336481:-"; transcript_id "AF:1:73279345-73281228:73281319:73279345-73336050:73336481:-:alternative1";
1	hq_isoforms.fasta.no5merge.collapsed.gff	exon	73336050	73336481	.	-	.	gene_id "AF:1:73279345-73281228:73281319:73279345-73336050:73336481:-"; transcript_id "AF:1:73279345-73281228:73281319:73279345-73336050:73336481:-:alternative1";
1	hq_isoforms.fasta.no5merge.collapsed.gff	exon	73279245	73279345	.	-	.	gene_id "AF:1:73279345-73281228:73281319:73279345-73336050:73336337:-"; transcript_id "AF:1:73279345-73281228:73281319:73279345-73336050:73336337:-:alternative2";
1	hq_isoforms.fasta.no5merge.collapsed.gff	exon	73281228	73281319	.	-	.	gene_id "AF:1:73279345-73281228:73281319:73279345-73336050:73336337:-"; transcript_id "AF:1:73279345-73281228:73281319:73279345-73336050:73336337:-:alternative2";
1	hq_isoforms.fasta.no5merge.collapsed.gff	exon	73279245	73279345	.	-	.	gene_id "AF:1:73279345-73281228:73281319:73279345-73336050:73336337:-"; transcript_id "AF:1:73279345-73281228:73281319:73279345-73336050:73336337:-:alternative1";
1	hq_isoforms.fasta.no5merge.collapsed.gff	exon	73336050	73336337	.	-	.	gene_id "AF:1:73279345-73281228:73281319:73279345-73336050:73336337:-"; transcript_id "AF:1:73279345-73281228:73281319:73279345-73336050:73336337:-:alternative1";
1	hq_isoforms.fasta.no5merge.collapsed.gff	exon	73279245	73279345	.	-	.	gene_id "AF:1:73279345-73281228:73281319:73279345-73336403:73336534:-"; transcript_id "AF:1:73279345-73281228:73281319:73279345-73336403:73336534:-:alternative2";
1	hq_isoforms.fasta.no5merge.collapsed.gff	exon	73281228	73281319	.	-	.	gene_id "AF:1:73279345-73281228:73281319:73279345-73336403:73336534:-"; transcript_id "AF:1:73279345-73281228:73281319:73279345-73336403:73336534:-:alternative2";
1	hq_isoforms.fasta.no5merge.collapsed.gff	exon	73279245	73279345	.	-	.	gene_id "AF:1:73279345-73281228:73281319:73279345-73336403:73336534:-"; transcript_id "AF:1:73279345-73281228:73281319:73279345-73336403:73336534:-:alternative1";
1	hq_isoforms.fasta.no5merge.collapsed.gff	exon	73336403	73336534	.	-	.	gene_id "AF:1:73279345-73281228:73281319:73279345-73336403:73336534:-"; transcript_id "AF:1:73279345-73281228:73281319:73279345-73336403:73336534:-:alternative1";
1	hq_isoforms.fasta.no5merge.collapsed.gff	exon	73279245	73279345	.	-	.	gene_id "AF:1:73279345-73281228:73281319:73279345-73336050:73336549:-"; transcript_id "AF:1:73279345-73281228:73281319:73279345-73336050:73336549:-:alternative2";
1	hq_isoforms.fasta.no5merge.collapsed.gff	exon	73281228	73281319	.	-	.	gene_id "AF:1:73279345-73281228:73281319:73279345-73336050:73336549:-"; transcript_id "AF:1:73279345-73281228:73281319:73279345-73336050:73336549:-:alternative2";
1	hq_isoforms.fasta.no5merge.collapsed.gff	exon	73279245	73279345	.	-	.	gene_id "AF:1:73279345-73281228:73281319:73279345-73336050:73336549:-"; transcript_id "AF:1:73279345-73281228:73281319:73279345-73336050:73336549:-:alternative1";
1	hq_isoforms.fasta.no5merge.collapsed.gff	exon	73336050	73336549	.	-	.	gene_id "AF:1:73279345-73281228:73281319:73279345-73336050:73336549:-"; transcript_id "AF:1:73279345-73281228:73281319:73279345-73336050:73336549:-:alternative1";
1	hq_isoforms.fasta.no5merge.collapsed.gff	exon	73279245	73279345	.	-	.	gene_id "AF:1:73279345-73281228:73281319:73279345-73336403:73336485:-"; transcript_id "AF:1:73279345-73281228:73281319:73279345-73336403:73336485:-:alternative2";
1	hq_isoforms.fasta.no5merge.collapsed.gff	exon	73281228	73281319	.	-	.	gene_id "AF:1:73279345-73281228:73281319:73279345-73336403:73336485:-"; transcript_id "AF:1:73279345-73281228:73281319:73279345-73336403:73336485:-:alternative2";
1	hq_isoforms.fasta.no5merge.collapsed.gff	exon	73279245	73279345	.	-	.	gene_id "AF:1:73279345-73281228:73281319:73279345-73336403:73336485:-"; transcript_id "AF:1:73279345-73281228:73281319:73279345-73336403:73336485:-:alternative1";
1	hq_isoforms.fasta.no5merge.collapsed.gff	exon	73336403	73336485	.	-	.	gene_id "AF:1:73279345-73281228:73281319:73279345-73336403:73336485:-"; transcript_id "AF:1:73279345-73281228:73281319:73279345-73336403:73336485:-:alternative1";
1	hq_isoforms.fasta.no5merge.collapsed.gff	exon	73279245	73279345	.	-	.	gene_id "AF:1:73279345-73281228:73281319:73279345-73336403:73336491:-"; transcript_id "AF:1:73279345-73281228:73281319:73279345-73336403:73336491:-:alternative2";
1	hq_isoforms.fasta.no5merge.collapsed.gff	exon	73281228	73281319	.	-	.	gene_id "AF:1:73279345-73281228:73281319:73279345-73336403:73336491:-"; transcript_id "AF:1:73279345-73281228:73281319:73279345-73336403:73336491:-:alternative2";
1	hq_isoforms.fasta.no5merge.collapsed.gff	exon	73279245	73279345	.	-	.	gene_id "AF:1:73279345-73281228:73281319:73279345-73336403:73336491:-"; transcript_id "AF:1:73279345-73281228:73281319:73279345-73336403:73336491:-:alternative1";
1	hq_isoforms.fasta.no5merge.collapsed.gff	exon	73336403	73336491	.	-	.	gene_id "AF:1:73279345-73281228:73281319:73279345-73336403:73336491:-"; transcript_id "AF:1:73279345-73281228:73281319:73279345-73336403:73336491:-:alternative1";
1	hq_isoforms.fasta.no5merge.collapsed.gff	exon	73279245	73279345	.	-	.	gene_id "AF:1:73279345-73281228:73281319:73279345-73336403:73336517:-"; transcript_id "AF:1:73279345-73281228:73281319:73279345-73336403:73336517:-:alternative2";
1	hq_isoforms.fasta.no5merge.collapsed.gff	exon	73281228	73281319	.	-	.	gene_id "AF:1:73279345-73281228:73281319:73279345-73336403:73336517:-"; transcript_id "AF:1:73279345-73281228:73281319:73279345-73336403:73336517:-:alternative2";
1	hq_isoforms.fasta.no5merge.collapsed.gff	exon	73279245	73279345	.	-	.	gene_id "AF:1:73279345-73281228:73281319:73279345-73336403:73336517:-"; transcript_id "AF:1:73279345-73281228:73281319:73279345-73336403:73336517:-:alternative1";
1	hq_isoforms.fasta.no5merge.collapsed.gff	exon	73336403	73336517	.	-	.	gene_id "AF:1:73279345-73281228:73281319:73279345-73336403:73336517:-"; transcript_id "AF:1:73279345-73281228:73281319:73279345-73336403:73336517:-:alternative1";
1	hq_isoforms.fasta.no5merge.collapsed.gff	exon	73279245	73279345	.	-	.	gene_id "AF:1:73279345-73281228:73281319:73279345-73336403:73336520:-"; transcript_id "AF:1:73279345-73281228:73281319:73279345-73336403:73336520:-:alternative2";
1	hq_isoforms.fasta.no5merge.collapsed.gff	exon	73281228	73281319	.	-	.	gene_id "AF:1:73279345-73281228:73281319:73279345-73336403:73336520:-"; transcript_id "AF:1:73279345-73281228:73281319:73279345-73336403:73336520:-:alternative2";
1	hq_isoforms.fasta.no5merge.collapsed.gff	exon	73279245	73279345	.	-	.	gene_id "AF:1:73279345-73281228:73281319:73279345-73336403:73336520:-"; transcript_id "AF:1:73279345-73281228:73281319:73279345-73336403:73336520:-:alternative1";
1	hq_isoforms.fasta.no5merge.collapsed.gff	exon	73336403	73336520	.	-	.	gene_id "AF:1:73279345-73281228:73281319:73279345-73336403:73336520:-"; transcript_id "AF:1:73279345-73281228:73281319:73279345-73336403:73336520:-:alternative1";
1	hq_isoforms.fasta.no5merge.collapsed.gff	exon	73279245	73279345	.	-	.	gene_id "AF:1:73279345-73281228:73281319:73279345-73336403:73336535:-"; transcript_id "AF:1:73279345-73281228:73281319:73279345-73336403:73336535:-:alternative2";
1	hq_isoforms.fasta.no5merge.collapsed.gff	exon	73281228	73281319	.	-	.	gene_id "AF:1:73279345-73281228:73281319:73279345-73336403:73336535:-"; transcript_id "AF:1:73279345-73281228:73281319:73279345-73336403:73336535:-:alternative2";
1	hq_isoforms.fasta.no5merge.collapsed.gff	exon	73279245	73279345	.	-	.	gene_id "AF:1:73279345-73281228:73281319:73279345-73336403:73336535:-"; transcript_id "AF:1:73279345-73281228:73281319:73279345-73336403:73336535:-:alternative1";
1	hq_isoforms.fasta.no5merge.collapsed.gff	exon	73336403	73336535	.	-	.	gene_id "AF:1:73279345-73281228:73281319:73279345-73336403:73336535:-"; transcript_id "AF:1:73279345-73281228:73281319:73279345-73336403:73336535:-:alternative1";
1	hq_isoforms.fasta.no5merge.collapsed.gff	exon	73279245	73279345	.	-	.	gene_id "AF:1:73279345-73281228:73281319:73279345-73336403:73336523:-"; transcript_id "AF:1:73279345-73281228:73281319:73279345-73336403:73336523:-:alternative2";
1	hq_isoforms.fasta.no5merge.collapsed.gff	exon	73281228	73281319	.	-	.	gene_id "AF:1:73279345-73281228:73281319:73279345-73336403:73336523:-"; transcript_id "AF:1:73279345-73281228:73281319:73279345-73336403:73336523:-:alternative2";
1	hq_isoforms.fasta.no5merge.collapsed.gff	exon	73279245	73279345	.	-	.	gene_id "AF:1:73279345-73281228:73281319:73279345-73336403:73336523:-"; transcript_id "AF:1:73279345-73281228:73281319:73279345-73336403:73336523:-:alternative1";
1	hq_isoforms.fasta.no5merge.collapsed.gff	exon	73336403	73336523	.	-	.	gene_id "AF:1:73279345-73281228:73281319:73279345-73336403:73336523:-"; transcript_id "AF:1:73279345-73281228:73281319:73279345-73336403:73336523:-:alternative1";
1	hq_isoforms.fasta.no5merge.collapsed.gff	exon	73279245	73279345	.	-	.	gene_id "AF:1:73279345-73281228:73281319:73279345-73336403:73336538:-"; transcript_id "AF:1:73279345-73281228:73281319:73279345-73336403:73336538:-:alternative2";
1	hq_isoforms.fasta.no5merge.collapsed.gff	exon	73281228	73281319	.	-	.	gene_id "AF:1:73279345-73281228:73281319:73279345-73336403:73336538:-"; transcript_id "AF:1:73279345-73281228:73281319:73279345-73336403:73336538:-:alternative2";
1	hq_isoforms.fasta.no5merge.collapsed.gff	exon	73279245	73279345	.	-	.	gene_id "AF:1:73279345-73281228:73281319:73279345-73336403:73336538:-"; transcript_id "AF:1:73279345-73281228:73281319:73279345-73336403:73336538:-:alternative1";
1	hq_isoforms.fasta.no5merge.collapsed.gff	exon	73336403	73336538	.	-	.	gene_id "AF:1:73279345-73281228:73281319:73279345-73336403:73336538:-"; transcript_id "AF:1:73279345-73281228:73281319:73279345-73336403:73336538:-:alternative1";
1	hq_isoforms.fasta.no5merge.collapsed.gff	exon	73391269	73391369	.	-	.	gene_id "AF:1:73391369-73393836:73396892:73391369-73398867:73398969:-"; transcript_id "AF:1:73391369-73393836:73396892:73391369-73398867:73398969:-:alternative2";
1	hq_isoforms.fasta.no5merge.collapsed.gff	exon	73393836	73396892	.	-	.	gene_id "AF:1:73391369-73393836:73396892:73391369-73398867:73398969:-"; transcript_id "AF:1:73391369-73393836:73396892:73391369-73398867:73398969:-:alternative2";
1	hq_isoforms.fasta.no5merge.collapsed.gff	exon	73391269	73391369	.	-	.	gene_id "AF:1:73391369-73393836:73396892:73391369-73398867:73398969:-"; transcript_id "AF:1:73391369-73393836:73396892:73391369-73398867:73398969:-:alternative1";
1	hq_isoforms.fasta.no5merge.collapsed.gff	exon	73398867	73398969	.	-	.	gene_id "AF:1:73391369-73393836:73396892:73391369-73398867:73398969:-"; transcript_id "AF:1:73391369-73393836:73396892:73391369-73398867:73398969:-:alternative1";
1	hq_isoforms.fasta.no5merge.collapsed.gff	exon	73391269	73391369	.	-	.	gene_id "AF:1:73391369-73393836:73396892:73391369-73398867:73399004:-"; transcript_id "AF:1:73391369-73393836:73396892:73391369-73398867:73399004:-:alternative2";
1	hq_isoforms.fasta.no5merge.collapsed.gff	exon	73393836	73396892	.	-	.	gene_id "AF:1:73391369-73393836:73396892:73391369-73398867:73399004:-"; transcript_id "AF:1:73391369-73393836:73396892:73391369-73398867:73399004:-:alternative2";
1	hq_isoforms.fasta.no5merge.collapsed.gff	exon	73391269	73391369	.	-	.	gene_id "AF:1:73391369-73393836:73396892:73391369-73398867:73399004:-"; transcript_id "AF:1:73391369-73393836:73396892:73391369-73398867:73399004:-:alternative1";
1	hq_isoforms.fasta.no5merge.collapsed.gff	exon	73398867	73399004	.	-	.	gene_id "AF:1:73391369-73393836:73396892:73391369-73398867:73399004:-"; transcript_id "AF:1:73391369-73393836:73396892:73391369-73398867:73399004:-:alternative1";
1	hq_isoforms.fasta.no5merge.collapsed.gff	exon	73391269	73391369	.	-	.	gene_id "AF:1:73391369-73393836:73396892:73391369-73398867:73398937:-"; transcript_id "AF:1:73391369-73393836:73396892:73391369-73398867:73398937:-:alternative2";
1	hq_isoforms.fasta.no5merge.collapsed.gff	exon	73393836	73396892	.	-	.	gene_id "AF:1:73391369-73393836:73396892:73391369-73398867:73398937:-"; transcript_id "AF:1:73391369-73393836:73396892:73391369-73398867:73398937:-:alternative2";
1	hq_isoforms.fasta.no5merge.collapsed.gff	exon	73391269	73391369	.	-	.	gene_id "AF:1:73391369-73393836:73396892:73391369-73398867:73398937:-"; transcript_id "AF:1:73391369-73393836:73396892:73391369-73398867:73398937:-:alternative1";
1	hq_isoforms.fasta.no5merge.collapsed.gff	exon	73398867	73398937	.	-	.	gene_id "AF:1:73391369-73393836:73396892:73391369-73398867:73398937:-"; transcript_id "AF:1:73391369-73393836:73396892:73391369-73398867:73398937:-:alternative1";
1	hq_isoforms.fasta.no5merge.collapsed.gff	exon	73391269	73391369	.	-	.	gene_id "AF:1:73391369-73393836:73396892:73391369-73398867:73398922:-"; transcript_id "AF:1:73391369-73393836:73396892:73391369-73398867:73398922:-:alternative2";
1	hq_isoforms.fasta.no5merge.collapsed.gff	exon	73393836	73396892	.	-	.	gene_id "AF:1:73391369-73393836:73396892:73391369-73398867:73398922:-"; transcript_id "AF:1:73391369-73393836:73396892:73391369-73398867:73398922:-:alternative2";
1	hq_isoforms.fasta.no5merge.collapsed.gff	exon	73391269	73391369	.	-	.	gene_id "AF:1:73391369-73393836:73396892:73391369-73398867:73398922:-"; transcript_id "AF:1:73391369-73393836:73396892:73391369-73398867:73398922:-:alternative1";
1	hq_isoforms.fasta.no5merge.collapsed.gff	exon	73398867	73398922	.	-	.	gene_id "AF:1:73391369-73393836:73396892:73391369-73398867:73398922:-"; transcript_id "AF:1:73391369-73393836:73396892:73391369-73398867:73398922:-:alternative1";
1	hq_isoforms.fasta.no5merge.collapsed.gff	exon	73391269	73391369	.	-	.	gene_id "AF:1:73391369-73393836:73396892:73391369-73398867:73398930:-"; transcript_id "AF:1:73391369-73393836:73396892:73391369-73398867:73398930:-:alternative2";
1	hq_isoforms.fasta.no5merge.collapsed.gff	exon	73393836	73396892	.	-	.	gene_id "AF:1:73391369-73393836:73396892:73391369-73398867:73398930:-"; transcript_id "AF:1:73391369-73393836:73396892:73391369-73398867:73398930:-:alternative2";
1	hq_isoforms.fasta.no5merge.collapsed.gff	exon	73391269	73391369	.	-	.	gene_id "AF:1:73391369-73393836:73396892:73391369-73398867:73398930:-"; transcript_id "AF:1:73391369-73393836:73396892:73391369-73398867:73398930:-:alternative1";
1	hq_isoforms.fasta.no5merge.collapsed.gff	exon	73398867	73398930	.	-	.	gene_id "AF:1:73391369-73393836:73396892:73391369-73398867:73398930:-"; transcript_id "AF:1:73391369-73393836:73396892:73391369-73398867:73398930:-:alternative1";
1	hq_isoforms.fasta.no5merge.collapsed.gff	exon	73391269	73391369	.	-	.	gene_id "AF:1:73391369-73393836:73396892:73391369-73398867:73398945:-"; transcript_id "AF:1:73391369-73393836:73396892:73391369-73398867:73398945:-:alternative2";
1	hq_isoforms.fasta.no5merge.collapsed.gff	exon	73393836	73396892	.	-	.	gene_id "AF:1:73391369-73393836:73396892:73391369-73398867:73398945:-"; transcript_id "AF:1:73391369-73393836:73396892:73391369-73398867:73398945:-:alternative2";
1	hq_isoforms.fasta.no5merge.collapsed.gff	exon	73391269	73391369	.	-	.	gene_id "AF:1:73391369-73393836:73396892:73391369-73398867:73398945:-"; transcript_id "AF:1:73391369-73393836:73396892:73391369-73398867:73398945:-:alternative1";
1	hq_isoforms.fasta.no5merge.collapsed.gff	exon	73398867	73398945	.	-	.	gene_id "AF:1:73391369-73393836:73396892:73391369-73398867:73398945:-"; transcript_id "AF:1:73391369-73393836:73396892:73391369-73398867:73398945:-:alternative1";
1	hq_isoforms.fasta.no5merge.collapsed.gff	exon	73391269	73391369	.	-	.	gene_id "AF:1:73391369-73393836:73396892:73391369-73398867:73398956:-"; transcript_id "AF:1:73391369-73393836:73396892:73391369-73398867:73398956:-:alternative2";
1	hq_isoforms.fasta.no5merge.collapsed.gff	exon	73393836	73396892	.	-	.	gene_id "AF:1:73391369-73393836:73396892:73391369-73398867:73398956:-"; transcript_id "AF:1:73391369-73393836:73396892:73391369-73398867:73398956:-:alternative2";
1	hq_isoforms.fasta.no5merge.collapsed.gff	exon	73391269	73391369	.	-	.	gene_id "AF:1:73391369-73393836:73396892:73391369-73398867:73398956:-"; transcript_id "AF:1:73391369-73393836:73396892:73391369-73398867:73398956:-:alternative1";
1	hq_isoforms.fasta.no5merge.collapsed.gff	exon	73398867	73398956	.	-	.	gene_id "AF:1:73391369-73393836:73396892:73391369-73398867:73398956:-"; transcript_id "AF:1:73391369-73393836:73396892:73391369-73398867:73398956:-:alternative1";
1	hq_isoforms.fasta.no5merge.collapsed.gff	exon	73430217	73430317	.	-	.	gene_id "AF:1:73430317-73435772:73435864:73430317-73457864:73457958:-"; transcript_id "AF:1:73430317-73435772:73435864:73430317-73457864:73457958:-:alternative2";
1	hq_isoforms.fasta.no5merge.collapsed.gff	exon	73435772	73435864	.	-	.	gene_id "AF:1:73430317-73435772:73435864:73430317-73457864:73457958:-"; transcript_id "AF:1:73430317-73435772:73435864:73430317-73457864:73457958:-:alternative2";
1	hq_isoforms.fasta.no5merge.collapsed.gff	exon	73430217	73430317	.	-	.	gene_id "AF:1:73430317-73435772:73435864:73430317-73457864:73457958:-"; transcript_id "AF:1:73430317-73435772:73435864:73430317-73457864:73457958:-:alternative1";
1	hq_isoforms.fasta.no5merge.collapsed.gff	exon	73457864	73457958	.	-	.	gene_id "AF:1:73430317-73435772:73435864:73430317-73457864:73457958:-"; transcript_id "AF:1:73430317-73435772:73435864:73430317-73457864:73457958:-:alternative1";
1	hq_isoforms.fasta.no5merge.collapsed.gff	exon	73430217	73430317	.	-	.	gene_id "AF:1:73430317-73435772:73435864:73430317-73457864:73457901:-"; transcript_id "AF:1:73430317-73435772:73435864:73430317-73457864:73457901:-:alternative2";
1	hq_isoforms.fasta.no5merge.collapsed.gff	exon	73435772	73435864	.	-	.	gene_id "AF:1:73430317-73435772:73435864:73430317-73457864:73457901:-"; transcript_id "AF:1:73430317-73435772:73435864:73430317-73457864:73457901:-:alternative2";
1	hq_isoforms.fasta.no5merge.collapsed.gff	exon	73430217	73430317	.	-	.	gene_id "AF:1:73430317-73435772:73435864:73430317-73457864:73457901:-"; transcript_id "AF:1:73430317-73435772:73435864:73430317-73457864:73457901:-:alternative1";
1	hq_isoforms.fasta.no5merge.collapsed.gff	exon	73457864	73457901	.	-	.	gene_id "AF:1:73430317-73435772:73435864:73430317-73457864:73457901:-"; transcript_id "AF:1:73430317-73435772:73435864:73430317-73457864:73457901:-:alternative1";
1	hq_isoforms.fasta.no5merge.collapsed.gff	exon	73430217	73430317	.	-	.	gene_id "AF:1:73430317-73435772:73435864:73430317-73457864:73457944:-"; transcript_id "AF:1:73430317-73435772:73435864:73430317-73457864:73457944:-:alternative2";
1	hq_isoforms.fasta.no5merge.collapsed.gff	exon	73435772	73435864	.	-	.	gene_id "AF:1:73430317-73435772:73435864:73430317-73457864:73457944:-"; transcript_id "AF:1:73430317-73435772:73435864:73430317-73457864:73457944:-:alternative2";
1	hq_isoforms.fasta.no5merge.collapsed.gff	exon	73430217	73430317	.	-	.	gene_id "AF:1:73430317-73435772:73435864:73430317-73457864:73457944:-"; transcript_id "AF:1:73430317-73435772:73435864:73430317-73457864:73457944:-:alternative1";
1	hq_isoforms.fasta.no5merge.collapsed.gff	exon	73457864	73457944	.	-	.	gene_id "AF:1:73430317-73435772:73435864:73430317-73457864:73457944:-"; transcript_id "AF:1:73430317-73435772:73435864:73430317-73457864:73457944:-:alternative1";
1	hq_isoforms.fasta.no5merge.collapsed.gff	exon	74301106	74301206	.	-	.	gene_id "AF:1:74301206-74302994:74303374:74301206-74306740:74307461:-"; transcript_id "AF:1:74301206-74302994:74303374:74301206-74306740:74307461:-:alternative2";
1	hq_isoforms.fasta.no5merge.collapsed.gff	exon	74302994	74303374	.	-	.	gene_id "AF:1:74301206-74302994:74303374:74301206-74306740:74307461:-"; transcript_id "AF:1:74301206-74302994:74303374:74301206-74306740:74307461:-:alternative2";
1	hq_isoforms.fasta.no5merge.collapsed.gff	exon	74301106	74301206	.	-	.	gene_id "AF:1:74301206-74302994:74303374:74301206-74306740:74307461:-"; transcript_id "AF:1:74301206-74302994:74303374:74301206-74306740:74307461:-:alternative1";
1	hq_isoforms.fasta.no5merge.collapsed.gff	exon	74306740	74307461	.	-	.	gene_id "AF:1:74301206-74302994:74303374:74301206-74306740:74307461:-"; transcript_id "AF:1:74301206-74302994:74303374:74301206-74306740:74307461:-:alternative1";
1	hq_isoforms.fasta.no5merge.collapsed.gff	exon	75678908	75679008	.	-	.	gene_id "AF:1:75679008-75715597:75715705:75679008-75761675:75761828:-"; transcript_id "AF:1:75679008-75715597:75715705:75679008-75761675:75761828:-:alternative2";
1	hq_isoforms.fasta.no5merge.collapsed.gff	exon	75715597	75715705	.	-	.	gene_id "AF:1:75679008-75715597:75715705:75679008-75761675:75761828:-"; transcript_id "AF:1:75679008-75715597:75715705:75679008-75761675:75761828:-:alternative2";
1	hq_isoforms.fasta.no5merge.collapsed.gff	exon	75678908	75679008	.	-	.	gene_id "AF:1:75679008-75715597:75715705:75679008-75761675:75761828:-"; transcript_id "AF:1:75679008-75715597:75715705:75679008-75761675:75761828:-:alternative1";
1	hq_isoforms.fasta.no5merge.collapsed.gff	exon	75761675	75761828	.	-	.	gene_id "AF:1:75679008-75715597:75715705:75679008-75761675:75761828:-"; transcript_id "AF:1:75679008-75715597:75715705:75679008-75761675:75761828:-:alternative1";
1	hq_isoforms.fasta.no5merge.collapsed.gff	exon	78039801	78039901	.	-	.	gene_id "AF:1:78039901-78040116:78040183:78039901-78040187:78040219:-"; transcript_id "AF:1:78039901-78040116:78040183:78039901-78040187:78040219:-:alternative2";
1	hq_isoforms.fasta.no5merge.collapsed.gff	exon	78040116	78040183	.	-	.	gene_id "AF:1:78039901-78040116:78040183:78039901-78040187:78040219:-"; transcript_id "AF:1:78039901-78040116:78040183:78039901-78040187:78040219:-:alternative2";
1	hq_isoforms.fasta.no5merge.collapsed.gff	exon	78039801	78039901	.	-	.	gene_id "AF:1:78039901-78040116:78040183:78039901-78040187:78040219:-"; transcript_id "AF:1:78039901-78040116:78040183:78039901-78040187:78040219:-:alternative1";
1	hq_isoforms.fasta.no5merge.collapsed.gff	exon	78040187	78040219	.	-	.	gene_id "AF:1:78039901-78040116:78040183:78039901-78040187:78040219:-"; transcript_id "AF:1:78039901-78040116:78040183:78039901-78040187:78040219:-:alternative1";
1	hq_isoforms.fasta.no5merge.collapsed.gff	exon	78039801	78039901	.	-	.	gene_id "AF:1:78039901-78040116:78040183:78039901-78040187:78040227:-"; transcript_id "AF:1:78039901-78040116:78040183:78039901-78040187:78040227:-:alternative2";
1	hq_isoforms.fasta.no5merge.collapsed.gff	exon	78040116	78040183	.	-	.	gene_id "AF:1:78039901-78040116:78040183:78039901-78040187:78040227:-"; transcript_id "AF:1:78039901-78040116:78040183:78039901-78040187:78040227:-:alternative2";
1	hq_isoforms.fasta.no5merge.collapsed.gff	exon	78039801	78039901	.	-	.	gene_id "AF:1:78039901-78040116:78040183:78039901-78040187:78040227:-"; transcript_id "AF:1:78039901-78040116:78040183:78039901-78040187:78040227:-:alternative1";
1	hq_isoforms.fasta.no5merge.collapsed.gff	exon	78040187	78040227	.	-	.	gene_id "AF:1:78039901-78040116:78040183:78039901-78040187:78040227:-"; transcript_id "AF:1:78039901-78040116:78040183:78039901-78040187:78040227:-:alternative1";
1	hq_isoforms.fasta.no5merge.collapsed.gff	exon	78039801	78039901	.	-	.	gene_id "AF:1:78039901-78040116:78040183:78039901-78040187:78040209:-"; transcript_id "AF:1:78039901-78040116:78040183:78039901-78040187:78040209:-:alternative2";
1	hq_isoforms.fasta.no5merge.collapsed.gff	exon	78040116	78040183	.	-	.	gene_id "AF:1:78039901-78040116:78040183:78039901-78040187:78040209:-"; transcript_id "AF:1:78039901-78040116:78040183:78039901-78040187:78040209:-:alternative2";
1	hq_isoforms.fasta.no5merge.collapsed.gff	exon	78039801	78039901	.	-	.	gene_id "AF:1:78039901-78040116:78040183:78039901-78040187:78040209:-"; transcript_id "AF:1:78039901-78040116:78040183:78039901-78040187:78040209:-:alternative1";
1	hq_isoforms.fasta.no5merge.collapsed.gff	exon	78040187	78040209	.	-	.	gene_id "AF:1:78039901-78040116:78040183:78039901-78040187:78040209:-"; transcript_id "AF:1:78039901-78040116:78040183:78039901-78040187:78040209:-:alternative1";
1	hq_isoforms.fasta.no5merge.collapsed.gff	exon	78039801	78039901	.	-	.	gene_id "AF:1:78039901-78040116:78040183:78039901-78040187:78040206:-"; transcript_id "AF:1:78039901-78040116:78040183:78039901-78040187:78040206:-:alternative2";
1	hq_isoforms.fasta.no5merge.collapsed.gff	exon	78040116	78040183	.	-	.	gene_id "AF:1:78039901-78040116:78040183:78039901-78040187:78040206:-"; transcript_id "AF:1:78039901-78040116:78040183:78039901-78040187:78040206:-:alternative2";
1	hq_isoforms.fasta.no5merge.collapsed.gff	exon	78039801	78039901	.	-	.	gene_id "AF:1:78039901-78040116:78040183:78039901-78040187:78040206:-"; transcript_id "AF:1:78039901-78040116:78040183:78039901-78040187:78040206:-:alternative1";
1	hq_isoforms.fasta.no5merge.collapsed.gff	exon	78040187	78040206	.	-	.	gene_id "AF:1:78039901-78040116:78040183:78039901-78040187:78040206:-"; transcript_id "AF:1:78039901-78040116:78040183:78039901-78040187:78040206:-:alternative1";
1	hq_isoforms.fasta.no5merge.collapsed.gff	exon	78039801	78039901	.	-	.	gene_id "AF:1:78039901-78040116:78040183:78039901-78040187:78040217:-"; transcript_id "AF:1:78039901-78040116:78040183:78039901-78040187:78040217:-:alternative2";
1	hq_isoforms.fasta.no5merge.collapsed.gff	exon	78040116	78040183	.	-	.	gene_id "AF:1:78039901-78040116:78040183:78039901-78040187:78040217:-"; transcript_id "AF:1:78039901-78040116:78040183:78039901-78040187:78040217:-:alternative2";
1	hq_isoforms.fasta.no5merge.collapsed.gff	exon	78039801	78039901	.	-	.	gene_id "AF:1:78039901-78040116:78040183:78039901-78040187:78040217:-"; transcript_id "AF:1:78039901-78040116:78040183:78039901-78040187:78040217:-:alternative1";
1	hq_isoforms.fasta.no5merge.collapsed.gff	exon	78040187	78040217	.	-	.	gene_id "AF:1:78039901-78040116:78040183:78039901-78040187:78040217:-"; transcript_id "AF:1:78039901-78040116:78040183:78039901-78040187:78040217:-:alternative1";
1	hq_isoforms.fasta.no5merge.collapsed.gff	exon	78039801	78039901	.	-	.	gene_id "AF:1:78039901-78040116:78040178:78039901-78040187:78040219:-"; transcript_id "AF:1:78039901-78040116:78040178:78039901-78040187:78040219:-:alternative2";
1	hq_isoforms.fasta.no5merge.collapsed.gff	exon	78040116	78040178	.	-	.	gene_id "AF:1:78039901-78040116:78040178:78039901-78040187:78040219:-"; transcript_id "AF:1:78039901-78040116:78040178:78039901-78040187:78040219:-:alternative2";
1	hq_isoforms.fasta.no5merge.collapsed.gff	exon	78039801	78039901	.	-	.	gene_id "AF:1:78039901-78040116:78040178:78039901-78040187:78040219:-"; transcript_id "AF:1:78039901-78040116:78040178:78039901-78040187:78040219:-:alternative1";
1	hq_isoforms.fasta.no5merge.collapsed.gff	exon	78040187	78040219	.	-	.	gene_id "AF:1:78039901-78040116:78040178:78039901-78040187:78040219:-"; transcript_id "AF:1:78039901-78040116:78040178:78039901-78040187:78040219:-:alternative1";
1	hq_isoforms.fasta.no5merge.collapsed.gff	exon	78039801	78039901	.	-	.	gene_id "AF:1:78039901-78040116:78040178:78039901-78040187:78040227:-"; transcript_id "AF:1:78039901-78040116:78040178:78039901-78040187:78040227:-:alternative2";
1	hq_isoforms.fasta.no5merge.collapsed.gff	exon	78040116	78040178	.	-	.	gene_id "AF:1:78039901-78040116:78040178:78039901-78040187:78040227:-"; transcript_id "AF:1:78039901-78040116:78040178:78039901-78040187:78040227:-:alternative2";
1	hq_isoforms.fasta.no5merge.collapsed.gff	exon	78039801	78039901	.	-	.	gene_id "AF:1:78039901-78040116:78040178:78039901-78040187:78040227:-"; transcript_id "AF:1:78039901-78040116:78040178:78039901-78040187:78040227:-:alternative1";
1	hq_isoforms.fasta.no5merge.collapsed.gff	exon	78040187	78040227	.	-	.	gene_id "AF:1:78039901-78040116:78040178:78039901-78040187:78040227:-"; transcript_id "AF:1:78039901-78040116:78040178:78039901-78040187:78040227:-:alternative1";
1	hq_isoforms.fasta.no5merge.collapsed.gff	exon	78039801	78039901	.	-	.	gene_id "AF:1:78039901-78040116:78040178:78039901-78040187:78040209:-"; transcript_id "AF:1:78039901-78040116:78040178:78039901-78040187:78040209:-:alternative2";
1	hq_isoforms.fasta.no5merge.collapsed.gff	exon	78040116	78040178	.	-	.	gene_id "AF:1:78039901-78040116:78040178:78039901-78040187:78040209:-"; transcript_id "AF:1:78039901-78040116:78040178:78039901-78040187:78040209:-:alternative2";
1	hq_isoforms.fasta.no5merge.collapsed.gff	exon	78039801	78039901	.	-	.	gene_id "AF:1:78039901-78040116:78040178:78039901-78040187:78040209:-"; transcript_id "AF:1:78039901-78040116:78040178:78039901-78040187:78040209:-:alternative1";
1	hq_isoforms.fasta.no5merge.collapsed.gff	exon	78040187	78040209	.	-	.	gene_id "AF:1:78039901-78040116:78040178:78039901-78040187:78040209:-"; transcript_id "AF:1:78039901-78040116:78040178:78039901-78040187:78040209:-:alternative1";
1	hq_isoforms.fasta.no5merge.collapsed.gff	exon	78039801	78039901	.	-	.	gene_id "AF:1:78039901-78040116:78040178:78039901-78040187:78040206:-"; transcript_id "AF:1:78039901-78040116:78040178:78039901-78040187:78040206:-:alternative2";
1	hq_isoforms.fasta.no5merge.collapsed.gff	exon	78040116	78040178	.	-	.	gene_id "AF:1:78039901-78040116:78040178:78039901-78040187:78040206:-"; transcript_id "AF:1:78039901-78040116:78040178:78039901-78040187:78040206:-:alternative2";
1	hq_isoforms.fasta.no5merge.collapsed.gff	exon	78039801	78039901	.	-	.	gene_id "AF:1:78039901-78040116:78040178:78039901-78040187:78040206:-"; transcript_id "AF:1:78039901-78040116:78040178:78039901-78040187:78040206:-:alternative1";
1	hq_isoforms.fasta.no5merge.collapsed.gff	exon	78040187	78040206	.	-	.	gene_id "AF:1:78039901-78040116:78040178:78039901-78040187:78040206:-"; transcript_id "AF:1:78039901-78040116:78040178:78039901-78040187:78040206:-:alternative1";
1	hq_isoforms.fasta.no5merge.collapsed.gff	exon	78039801	78039901	.	-	.	gene_id "AF:1:78039901-78040116:78040178:78039901-78040187:78040217:-"; transcript_id "AF:1:78039901-78040116:78040178:78039901-78040187:78040217:-:alternative2";
1	hq_isoforms.fasta.no5merge.collapsed.gff	exon	78040116	78040178	.	-	.	gene_id "AF:1:78039901-78040116:78040178:78039901-78040187:78040217:-"; transcript_id "AF:1:78039901-78040116:78040178:78039901-78040187:78040217:-:alternative2";
1	hq_isoforms.fasta.no5merge.collapsed.gff	exon	78039801	78039901	.	-	.	gene_id "AF:1:78039901-78040116:78040178:78039901-78040187:78040217:-"; transcript_id "AF:1:78039901-78040116:78040178:78039901-78040187:78040217:-:alternative1";
1	hq_isoforms.fasta.no5merge.collapsed.gff	exon	78040187	78040217	.	-	.	gene_id "AF:1:78039901-78040116:78040178:78039901-78040187:78040217:-"; transcript_id "AF:1:78039901-78040116:78040178:78039901-78040187:78040217:-:alternative1";
1	hq_isoforms.fasta.no5merge.collapsed.gff	exon	79001040	79001140	.	-	.	gene_id "AF:1:79001140-79003219:79003387:79001140-79003760:79003870:-"; transcript_id "AF:1:79001140-79003219:79003387:79001140-79003760:79003870:-:alternative2";
1	hq_isoforms.fasta.no5merge.collapsed.gff	exon	79003219	79003387	.	-	.	gene_id "AF:1:79001140-79003219:79003387:79001140-79003760:79003870:-"; transcript_id "AF:1:79001140-79003219:79003387:79001140-79003760:79003870:-:alternative2";
1	hq_isoforms.fasta.no5merge.collapsed.gff	exon	79001040	79001140	.	-	.	gene_id "AF:1:79001140-79003219:79003387:79001140-79003760:79003870:-"; transcript_id "AF:1:79001140-79003219:79003387:79001140-79003760:79003870:-:alternative1";
1	hq_isoforms.fasta.no5merge.collapsed.gff	exon	79003760	79003870	.	-	.	gene_id "AF:1:79001140-79003219:79003387:79001140-79003760:79003870:-"; transcript_id "AF:1:79001140-79003219:79003387:79001140-79003760:79003870:-:alternative1";
1	hq_isoforms.fasta.no5merge.collapsed.gff	exon	79001040	79001140	.	-	.	gene_id "AF:1:79001140-79003219:79003387:79001140-79003760:79003852:-"; transcript_id "AF:1:79001140-79003219:79003387:79001140-79003760:79003852:-:alternative2";
1	hq_isoforms.fasta.no5merge.collapsed.gff	exon	79003219	79003387	.	-	.	gene_id "AF:1:79001140-79003219:79003387:79001140-79003760:79003852:-"; transcript_id "AF:1:79001140-79003219:79003387:79001140-79003760:79003852:-:alternative2";
1	hq_isoforms.fasta.no5merge.collapsed.gff	exon	79001040	79001140	.	-	.	gene_id "AF:1:79001140-79003219:79003387:79001140-79003760:79003852:-"; transcript_id "AF:1:79001140-79003219:79003387:79001140-79003760:79003852:-:alternative1";
1	hq_isoforms.fasta.no5merge.collapsed.gff	exon	79003760	79003852	.	-	.	gene_id "AF:1:79001140-79003219:79003387:79001140-79003760:79003852:-"; transcript_id "AF:1:79001140-79003219:79003387:79001140-79003760:79003852:-:alternative1";
1	hq_isoforms.fasta.no5merge.collapsed.gff	exon	79001040	79001140	.	-	.	gene_id "AF:1:79001140-79003219:79003387:79001140-79003760:79003865:-"; transcript_id "AF:1:79001140-79003219:79003387:79001140-79003760:79003865:-:alternative2";
1	hq_isoforms.fasta.no5merge.collapsed.gff	exon	79003219	79003387	.	-	.	gene_id "AF:1:79001140-79003219:79003387:79001140-79003760:79003865:-"; transcript_id "AF:1:79001140-79003219:79003387:79001140-79003760:79003865:-:alternative2";
1	hq_isoforms.fasta.no5merge.collapsed.gff	exon	79001040	79001140	.	-	.	gene_id "AF:1:79001140-79003219:79003387:79001140-79003760:79003865:-"; transcript_id "AF:1:79001140-79003219:79003387:79001140-79003760:79003865:-:alternative1";
1	hq_isoforms.fasta.no5merge.collapsed.gff	exon	79003760	79003865	.	-	.	gene_id "AF:1:79001140-79003219:79003387:79001140-79003760:79003865:-"; transcript_id "AF:1:79001140-79003219:79003387:79001140-79003760:79003865:-:alternative1";
1	hq_isoforms.fasta.no5merge.collapsed.gff	exon	79001040	79001140	.	-	.	gene_id "AF:1:79001140-79003219:79003387:79001140-79003760:79003869:-"; transcript_id "AF:1:79001140-79003219:79003387:79001140-79003760:79003869:-:alternative2";
1	hq_isoforms.fasta.no5merge.collapsed.gff	exon	79003219	79003387	.	-	.	gene_id "AF:1:79001140-79003219:79003387:79001140-79003760:79003869:-"; transcript_id "AF:1:79001140-79003219:79003387:79001140-79003760:79003869:-:alternative2";
1	hq_isoforms.fasta.no5merge.collapsed.gff	exon	79001040	79001140	.	-	.	gene_id "AF:1:79001140-79003219:79003387:79001140-79003760:79003869:-"; transcript_id "AF:1:79001140-79003219:79003387:79001140-79003760:79003869:-:alternative1";
1	hq_isoforms.fasta.no5merge.collapsed.gff	exon	79003760	79003869	.	-	.	gene_id "AF:1:79001140-79003219:79003387:79001140-79003760:79003869:-"; transcript_id "AF:1:79001140-79003219:79003387:79001140-79003760:79003869:-:alternative1";
1	hq_isoforms.fasta.no5merge.collapsed.gff	exon	79001040	79001140	.	-	.	gene_id "AF:1:79001140-79003219:79003387:79001140-79023418:79023504:-"; transcript_id "AF:1:79001140-79003219:79003387:79001140-79023418:79023504:-:alternative2";
1	hq_isoforms.fasta.no5merge.collapsed.gff	exon	79003219	79003387	.	-	.	gene_id "AF:1:79001140-79003219:79003387:79001140-79023418:79023504:-"; transcript_id "AF:1:79001140-79003219:79003387:79001140-79023418:79023504:-:alternative2";
1	hq_isoforms.fasta.no5merge.collapsed.gff	exon	79001040	79001140	.	-	.	gene_id "AF:1:79001140-79003219:79003387:79001140-79023418:79023504:-"; transcript_id "AF:1:79001140-79003219:79003387:79001140-79023418:79023504:-:alternative1";
1	hq_isoforms.fasta.no5merge.collapsed.gff	exon	79023418	79023504	.	-	.	gene_id "AF:1:79001140-79003219:79003387:79001140-79023418:79023504:-"; transcript_id "AF:1:79001140-79003219:79003387:79001140-79023418:79023504:-:alternative1";
1	hq_isoforms.fasta.no5merge.collapsed.gff	exon	79001040	79001140	.	-	.	gene_id "AF:1:79001140-79003760:79003870:79001140-79023418:79023504:-"; transcript_id "AF:1:79001140-79003760:79003870:79001140-79023418:79023504:-:alternative2";
1	hq_isoforms.fasta.no5merge.collapsed.gff	exon	79003760	79003870	.	-	.	gene_id "AF:1:79001140-79003760:79003870:79001140-79023418:79023504:-"; transcript_id "AF:1:79001140-79003760:79003870:79001140-79023418:79023504:-:alternative2";
1	hq_isoforms.fasta.no5merge.collapsed.gff	exon	79001040	79001140	.	-	.	gene_id "AF:1:79001140-79003760:79003870:79001140-79023418:79023504:-"; transcript_id "AF:1:79001140-79003760:79003870:79001140-79023418:79023504:-:alternative1";
1	hq_isoforms.fasta.no5merge.collapsed.gff	exon	79023418	79023504	.	-	.	gene_id "AF:1:79001140-79003760:79003870:79001140-79023418:79023504:-"; transcript_id "AF:1:79001140-79003760:79003870:79001140-79023418:79023504:-:alternative1";
1	hq_isoforms.fasta.no5merge.collapsed.gff	exon	79001040	79001140	.	-	.	gene_id "AF:1:79001140-79002755:79002886:79001140-79003219:79003387:-"; transcript_id "AF:1:79001140-79002755:79002886:79001140-79003219:79003387:-:alternative2";
1	hq_isoforms.fasta.no5merge.collapsed.gff	exon	79002755	79002886	.	-	.	gene_id "AF:1:79001140-79002755:79002886:79001140-79003219:79003387:-"; transcript_id "AF:1:79001140-79002755:79002886:79001140-79003219:79003387:-:alternative2";
1	hq_isoforms.fasta.no5merge.collapsed.gff	exon	79001040	79001140	.	-	.	gene_id "AF:1:79001140-79002755:79002886:79001140-79003219:79003387:-"; transcript_id "AF:1:79001140-79002755:79002886:79001140-79003219:79003387:-:alternative1";
1	hq_isoforms.fasta.no5merge.collapsed.gff	exon	79003219	79003387	.	-	.	gene_id "AF:1:79001140-79002755:79002886:79001140-79003219:79003387:-"; transcript_id "AF:1:79001140-79002755:79002886:79001140-79003219:79003387:-:alternative1";
1	hq_isoforms.fasta.no5merge.collapsed.gff	exon	79001040	79001140	.	-	.	gene_id "AF:1:79001140-79002755:79002886:79001140-79003760:79003870:-"; transcript_id "AF:1:79001140-79002755:79002886:79001140-79003760:79003870:-:alternative2";
1	hq_isoforms.fasta.no5merge.collapsed.gff	exon	79002755	79002886	.	-	.	gene_id "AF:1:79001140-79002755:79002886:79001140-79003760:79003870:-"; transcript_id "AF:1:79001140-79002755:79002886:79001140-79003760:79003870:-:alternative2";
1	hq_isoforms.fasta.no5merge.collapsed.gff	exon	79001040	79001140	.	-	.	gene_id "AF:1:79001140-79002755:79002886:79001140-79003760:79003870:-"; transcript_id "AF:1:79001140-79002755:79002886:79001140-79003760:79003870:-:alternative1";
1	hq_isoforms.fasta.no5merge.collapsed.gff	exon	79003760	79003870	.	-	.	gene_id "AF:1:79001140-79002755:79002886:79001140-79003760:79003870:-"; transcript_id "AF:1:79001140-79002755:79002886:79001140-79003760:79003870:-:alternative1";
1	hq_isoforms.fasta.no5merge.collapsed.gff	exon	79001040	79001140	.	-	.	gene_id "AF:1:79001140-79002755:79002886:79001140-79003760:79003852:-"; transcript_id "AF:1:79001140-79002755:79002886:79001140-79003760:79003852:-:alternative2";
1	hq_isoforms.fasta.no5merge.collapsed.gff	exon	79002755	79002886	.	-	.	gene_id "AF:1:79001140-79002755:79002886:79001140-79003760:79003852:-"; transcript_id "AF:1:79001140-79002755:79002886:79001140-79003760:79003852:-:alternative2";
1	hq_isoforms.fasta.no5merge.collapsed.gff	exon	79001040	79001140	.	-	.	gene_id "AF:1:79001140-79002755:79002886:79001140-79003760:79003852:-"; transcript_id "AF:1:79001140-79002755:79002886:79001140-79003760:79003852:-:alternative1";
1	hq_isoforms.fasta.no5merge.collapsed.gff	exon	79003760	79003852	.	-	.	gene_id "AF:1:79001140-79002755:79002886:79001140-79003760:79003852:-"; transcript_id "AF:1:79001140-79002755:79002886:79001140-79003760:79003852:-:alternative1";
1	hq_isoforms.fasta.no5merge.collapsed.gff	exon	79001040	79001140	.	-	.	gene_id "AF:1:79001140-79002755:79002886:79001140-79003760:79003865:-"; transcript_id "AF:1:79001140-79002755:79002886:79001140-79003760:79003865:-:alternative2";
1	hq_isoforms.fasta.no5merge.collapsed.gff	exon	79002755	79002886	.	-	.	gene_id "AF:1:79001140-79002755:79002886:79001140-79003760:79003865:-"; transcript_id "AF:1:79001140-79002755:79002886:79001140-79003760:79003865:-:alternative2";
1	hq_isoforms.fasta.no5merge.collapsed.gff	exon	79001040	79001140	.	-	.	gene_id "AF:1:79001140-79002755:79002886:79001140-79003760:79003865:-"; transcript_id "AF:1:79001140-79002755:79002886:79001140-79003760:79003865:-:alternative1";
1	hq_isoforms.fasta.no5merge.collapsed.gff	exon	79003760	79003865	.	-	.	gene_id "AF:1:79001140-79002755:79002886:79001140-79003760:79003865:-"; transcript_id "AF:1:79001140-79002755:79002886:79001140-79003760:79003865:-:alternative1";
1	hq_isoforms.fasta.no5merge.collapsed.gff	exon	79001040	79001140	.	-	.	gene_id "AF:1:79001140-79002755:79002886:79001140-79003760:79003869:-"; transcript_id "AF:1:79001140-79002755:79002886:79001140-79003760:79003869:-:alternative2";
1	hq_isoforms.fasta.no5merge.collapsed.gff	exon	79002755	79002886	.	-	.	gene_id "AF:1:79001140-79002755:79002886:79001140-79003760:79003869:-"; transcript_id "AF:1:79001140-79002755:79002886:79001140-79003760:79003869:-:alternative2";
1	hq_isoforms.fasta.no5merge.collapsed.gff	exon	79001040	79001140	.	-	.	gene_id "AF:1:79001140-79002755:79002886:79001140-79003760:79003869:-"; transcript_id "AF:1:79001140-79002755:79002886:79001140-79003760:79003869:-:alternative1";
1	hq_isoforms.fasta.no5merge.collapsed.gff	exon	79003760	79003869	.	-	.	gene_id "AF:1:79001140-79002755:79002886:79001140-79003760:79003869:-"; transcript_id "AF:1:79001140-79002755:79002886:79001140-79003760:79003869:-:alternative1";
1	hq_isoforms.fasta.no5merge.collapsed.gff	exon	79001040	79001140	.	-	.	gene_id "AF:1:79001140-79002755:79002886:79001140-79023418:79023504:-"; transcript_id "AF:1:79001140-79002755:79002886:79001140-79023418:79023504:-:alternative2";
1	hq_isoforms.fasta.no5merge.collapsed.gff	exon	79002755	79002886	.	-	.	gene_id "AF:1:79001140-79002755:79002886:79001140-79023418:79023504:-"; transcript_id "AF:1:79001140-79002755:79002886:79001140-79023418:79023504:-:alternative2";
1	hq_isoforms.fasta.no5merge.collapsed.gff	exon	79001040	79001140	.	-	.	gene_id "AF:1:79001140-79002755:79002886:79001140-79023418:79023504:-"; transcript_id "AF:1:79001140-79002755:79002886:79001140-79023418:79023504:-:alternative1";
1	hq_isoforms.fasta.no5merge.collapsed.gff	exon	79023418	79023504	.	-	.	gene_id "AF:1:79001140-79002755:79002886:79001140-79023418:79023504:-"; transcript_id "AF:1:79001140-79002755:79002886:79001140-79023418:79023504:-:alternative1";
1	hq_isoforms.fasta.no5merge.collapsed.gff	exon	79001040	79001140	.	-	.	gene_id "AF:1:79001140-79003760:79003852:79001140-79023418:79023504:-"; transcript_id "AF:1:79001140-79003760:79003852:79001140-79023418:79023504:-:alternative2";
1	hq_isoforms.fasta.no5merge.collapsed.gff	exon	79003760	79003852	.	-	.	gene_id "AF:1:79001140-79003760:79003852:79001140-79023418:79023504:-"; transcript_id "AF:1:79001140-79003760:79003852:79001140-79023418:79023504:-:alternative2";
1	hq_isoforms.fasta.no5merge.collapsed.gff	exon	79001040	79001140	.	-	.	gene_id "AF:1:79001140-79003760:79003852:79001140-79023418:79023504:-"; transcript_id "AF:1:79001140-79003760:79003852:79001140-79023418:79023504:-:alternative1";
1	hq_isoforms.fasta.no5merge.collapsed.gff	exon	79023418	79023504	.	-	.	gene_id "AF:1:79001140-79003760:79003852:79001140-79023418:79023504:-"; transcript_id "AF:1:79001140-79003760:79003852:79001140-79023418:79023504:-:alternative1";
1	hq_isoforms.fasta.no5merge.collapsed.gff	exon	79001040	79001140	.	-	.	gene_id "AF:1:79001140-79003760:79003865:79001140-79023418:79023504:-"; transcript_id "AF:1:79001140-79003760:79003865:79001140-79023418:79023504:-:alternative2";
1	hq_isoforms.fasta.no5merge.collapsed.gff	exon	79003760	79003865	.	-	.	gene_id "AF:1:79001140-79003760:79003865:79001140-79023418:79023504:-"; transcript_id "AF:1:79001140-79003760:79003865:79001140-79023418:79023504:-:alternative2";
1	hq_isoforms.fasta.no5merge.collapsed.gff	exon	79001040	79001140	.	-	.	gene_id "AF:1:79001140-79003760:79003865:79001140-79023418:79023504:-"; transcript_id "AF:1:79001140-79003760:79003865:79001140-79023418:79023504:-:alternative1";
1	hq_isoforms.fasta.no5merge.collapsed.gff	exon	79023418	79023504	.	-	.	gene_id "AF:1:79001140-79003760:79003865:79001140-79023418:79023504:-"; transcript_id "AF:1:79001140-79003760:79003865:79001140-79023418:79023504:-:alternative1";
1	hq_isoforms.fasta.no5merge.collapsed.gff	exon	79001040	79001140	.	-	.	gene_id "AF:1:79001140-79003760:79003869:79001140-79023418:79023504:-"; transcript_id "AF:1:79001140-79003760:79003869:79001140-79023418:79023504:-:alternative2";
1	hq_isoforms.fasta.no5merge.collapsed.gff	exon	79003760	79003869	.	-	.	gene_id "AF:1:79001140-79003760:79003869:79001140-79023418:79023504:-"; transcript_id "AF:1:79001140-79003760:79003869:79001140-79023418:79023504:-:alternative2";
1	hq_isoforms.fasta.no5merge.collapsed.gff	exon	79001040	79001140	.	-	.	gene_id "AF:1:79001140-79003760:79003869:79001140-79023418:79023504:-"; transcript_id "AF:1:79001140-79003760:79003869:79001140-79023418:79023504:-:alternative1";
1	hq_isoforms.fasta.no5merge.collapsed.gff	exon	79023418	79023504	.	-	.	gene_id "AF:1:79001140-79003760:79003869:79001140-79023418:79023504:-"; transcript_id "AF:1:79001140-79003760:79003869:79001140-79023418:79023504:-:alternative1";
1	hq_isoforms.fasta.no5merge.collapsed.gff	exon	79391967	79392067	.	-	.	gene_id "AF:1:79392067-79398870:79399016:79392067-79400333:79400507:-"; transcript_id "AF:1:79392067-79398870:79399016:79392067-79400333:79400507:-:alternative2";
1	hq_isoforms.fasta.no5merge.collapsed.gff	exon	79398870	79399016	.	-	.	gene_id "AF:1:79392067-79398870:79399016:79392067-79400333:79400507:-"; transcript_id "AF:1:79392067-79398870:79399016:79392067-79400333:79400507:-:alternative2";
1	hq_isoforms.fasta.no5merge.collapsed.gff	exon	79391967	79392067	.	-	.	gene_id "AF:1:79392067-79398870:79399016:79392067-79400333:79400507:-"; transcript_id "AF:1:79392067-79398870:79399016:79392067-79400333:79400507:-:alternative1";
1	hq_isoforms.fasta.no5merge.collapsed.gff	exon	79400333	79400507	.	-	.	gene_id "AF:1:79392067-79398870:79399016:79392067-79400333:79400507:-"; transcript_id "AF:1:79392067-79398870:79399016:79392067-79400333:79400507:-:alternative1";
1	hq_isoforms.fasta.no5merge.collapsed.gff	exon	82187180	82187280	.	-	.	gene_id "AF:1:82187280-82190368:82190490:82187280-82197179:82197245:-"; transcript_id "AF:1:82187280-82190368:82190490:82187280-82197179:82197245:-:alternative2";
1	hq_isoforms.fasta.no5merge.collapsed.gff	exon	82190368	82190490	.	-	.	gene_id "AF:1:82187280-82190368:82190490:82187280-82197179:82197245:-"; transcript_id "AF:1:82187280-82190368:82190490:82187280-82197179:82197245:-:alternative2";
1	hq_isoforms.fasta.no5merge.collapsed.gff	exon	82187180	82187280	.	-	.	gene_id "AF:1:82187280-82190368:82190490:82187280-82197179:82197245:-"; transcript_id "AF:1:82187280-82190368:82190490:82187280-82197179:82197245:-:alternative1";
1	hq_isoforms.fasta.no5merge.collapsed.gff	exon	82197179	82197245	.	-	.	gene_id "AF:1:82187280-82190368:82190490:82187280-82197179:82197245:-"; transcript_id "AF:1:82187280-82190368:82190490:82187280-82197179:82197245:-:alternative1";
1	hq_isoforms.fasta.no5merge.collapsed.gff	exon	82187180	82187280	.	-	.	gene_id "AF:1:82187280-82190368:82190490:82187280-82197179:82197239:-"; transcript_id "AF:1:82187280-82190368:82190490:82187280-82197179:82197239:-:alternative2";
1	hq_isoforms.fasta.no5merge.collapsed.gff	exon	82190368	82190490	.	-	.	gene_id "AF:1:82187280-82190368:82190490:82187280-82197179:82197239:-"; transcript_id "AF:1:82187280-82190368:82190490:82187280-82197179:82197239:-:alternative2";
1	hq_isoforms.fasta.no5merge.collapsed.gff	exon	82187180	82187280	.	-	.	gene_id "AF:1:82187280-82190368:82190490:82187280-82197179:82197239:-"; transcript_id "AF:1:82187280-82190368:82190490:82187280-82197179:82197239:-:alternative1";
1	hq_isoforms.fasta.no5merge.collapsed.gff	exon	82197179	82197239	.	-	.	gene_id "AF:1:82187280-82190368:82190490:82187280-82197179:82197239:-"; transcript_id "AF:1:82187280-82190368:82190490:82187280-82197179:82197239:-:alternative1";
1	hq_isoforms.fasta.no5merge.collapsed.gff	exon	82187180	82187280	.	-	.	gene_id "AF:1:82187280-82190368:82190490:82187280-82197179:82197241:-"; transcript_id "AF:1:82187280-82190368:82190490:82187280-82197179:82197241:-:alternative2";
1	hq_isoforms.fasta.no5merge.collapsed.gff	exon	82190368	82190490	.	-	.	gene_id "AF:1:82187280-82190368:82190490:82187280-82197179:82197241:-"; transcript_id "AF:1:82187280-82190368:82190490:82187280-82197179:82197241:-:alternative2";
1	hq_isoforms.fasta.no5merge.collapsed.gff	exon	82187180	82187280	.	-	.	gene_id "AF:1:82187280-82190368:82190490:82187280-82197179:82197241:-"; transcript_id "AF:1:82187280-82190368:82190490:82187280-82197179:82197241:-:alternative1";
1	hq_isoforms.fasta.no5merge.collapsed.gff	exon	82197179	82197241	.	-	.	gene_id "AF:1:82187280-82190368:82190490:82187280-82197179:82197241:-"; transcript_id "AF:1:82187280-82190368:82190490:82187280-82197179:82197241:-:alternative1";
1	hq_isoforms.fasta.no5merge.collapsed.gff	exon	82187180	82187280	.	-	.	gene_id "AF:1:82187280-82190368:82190490:82187280-82197179:82197222:-"; transcript_id "AF:1:82187280-82190368:82190490:82187280-82197179:82197222:-:alternative2";
1	hq_isoforms.fasta.no5merge.collapsed.gff	exon	82190368	82190490	.	-	.	gene_id "AF:1:82187280-82190368:82190490:82187280-82197179:82197222:-"; transcript_id "AF:1:82187280-82190368:82190490:82187280-82197179:82197222:-:alternative2";
1	hq_isoforms.fasta.no5merge.collapsed.gff	exon	82187180	82187280	.	-	.	gene_id "AF:1:82187280-82190368:82190490:82187280-82197179:82197222:-"; transcript_id "AF:1:82187280-82190368:82190490:82187280-82197179:82197222:-:alternative1";
1	hq_isoforms.fasta.no5merge.collapsed.gff	exon	82197179	82197222	.	-	.	gene_id "AF:1:82187280-82190368:82190490:82187280-82197179:82197222:-"; transcript_id "AF:1:82187280-82190368:82190490:82187280-82197179:82197222:-:alternative1";
1	hq_isoforms.fasta.no5merge.collapsed.gff	exon	82187180	82187280	.	-	.	gene_id "AF:1:82187280-82190368:82190490:82187280-82191412:82191515:-"; transcript_id "AF:1:82187280-82190368:82190490:82187280-82191412:82191515:-:alternative2";
1	hq_isoforms.fasta.no5merge.collapsed.gff	exon	82190368	82190490	.	-	.	gene_id "AF:1:82187280-82190368:82190490:82187280-82191412:82191515:-"; transcript_id "AF:1:82187280-82190368:82190490:82187280-82191412:82191515:-:alternative2";
1	hq_isoforms.fasta.no5merge.collapsed.gff	exon	82187180	82187280	.	-	.	gene_id "AF:1:82187280-82190368:82190490:82187280-82191412:82191515:-"; transcript_id "AF:1:82187280-82190368:82190490:82187280-82191412:82191515:-:alternative1";
1	hq_isoforms.fasta.no5merge.collapsed.gff	exon	82191412	82191515	.	-	.	gene_id "AF:1:82187280-82190368:82190490:82187280-82191412:82191515:-"; transcript_id "AF:1:82187280-82190368:82190490:82187280-82191412:82191515:-:alternative1";
1	hq_isoforms.fasta.no5merge.collapsed.gff	exon	82187180	82187280	.	-	.	gene_id "AF:1:82187280-82190368:82190901:82187280-82197179:82197245:-"; transcript_id "AF:1:82187280-82190368:82190901:82187280-82197179:82197245:-:alternative2";
1	hq_isoforms.fasta.no5merge.collapsed.gff	exon	82190368	82190901	.	-	.	gene_id "AF:1:82187280-82190368:82190901:82187280-82197179:82197245:-"; transcript_id "AF:1:82187280-82190368:82190901:82187280-82197179:82197245:-:alternative2";
1	hq_isoforms.fasta.no5merge.collapsed.gff	exon	82187180	82187280	.	-	.	gene_id "AF:1:82187280-82190368:82190901:82187280-82197179:82197245:-"; transcript_id "AF:1:82187280-82190368:82190901:82187280-82197179:82197245:-:alternative1";
1	hq_isoforms.fasta.no5merge.collapsed.gff	exon	82197179	82197245	.	-	.	gene_id "AF:1:82187280-82190368:82190901:82187280-82197179:82197245:-"; transcript_id "AF:1:82187280-82190368:82190901:82187280-82197179:82197245:-:alternative1";
1	hq_isoforms.fasta.no5merge.collapsed.gff	exon	82187180	82187280	.	-	.	gene_id "AF:1:82187280-82190368:82190901:82187280-82197179:82197239:-"; transcript_id "AF:1:82187280-82190368:82190901:82187280-82197179:82197239:-:alternative2";
1	hq_isoforms.fasta.no5merge.collapsed.gff	exon	82190368	82190901	.	-	.	gene_id "AF:1:82187280-82190368:82190901:82187280-82197179:82197239:-"; transcript_id "AF:1:82187280-82190368:82190901:82187280-82197179:82197239:-:alternative2";
1	hq_isoforms.fasta.no5merge.collapsed.gff	exon	82187180	82187280	.	-	.	gene_id "AF:1:82187280-82190368:82190901:82187280-82197179:82197239:-"; transcript_id "AF:1:82187280-82190368:82190901:82187280-82197179:82197239:-:alternative1";
1	hq_isoforms.fasta.no5merge.collapsed.gff	exon	82197179	82197239	.	-	.	gene_id "AF:1:82187280-82190368:82190901:82187280-82197179:82197239:-"; transcript_id "AF:1:82187280-82190368:82190901:82187280-82197179:82197239:-:alternative1";
1	hq_isoforms.fasta.no5merge.collapsed.gff	exon	82187180	82187280	.	-	.	gene_id "AF:1:82187280-82190368:82190901:82187280-82197179:82197241:-"; transcript_id "AF:1:82187280-82190368:82190901:82187280-82197179:82197241:-:alternative2";
1	hq_isoforms.fasta.no5merge.collapsed.gff	exon	82190368	82190901	.	-	.	gene_id "AF:1:82187280-82190368:82190901:82187280-82197179:82197241:-"; transcript_id "AF:1:82187280-82190368:82190901:82187280-82197179:82197241:-:alternative2";
1	hq_isoforms.fasta.no5merge.collapsed.gff	exon	82187180	82187280	.	-	.	gene_id "AF:1:82187280-82190368:82190901:82187280-82197179:82197241:-"; transcript_id "AF:1:82187280-82190368:82190901:82187280-82197179:82197241:-:alternative1";
1	hq_isoforms.fasta.no5merge.collapsed.gff	exon	82197179	82197241	.	-	.	gene_id "AF:1:82187280-82190368:82190901:82187280-82197179:82197241:-"; transcript_id "AF:1:82187280-82190368:82190901:82187280-82197179:82197241:-:alternative1";
1	hq_isoforms.fasta.no5merge.collapsed.gff	exon	82187180	82187280	.	-	.	gene_id "AF:1:82187280-82190368:82190901:82187280-82197179:82197222:-"; transcript_id "AF:1:82187280-82190368:82190901:82187280-82197179:82197222:-:alternative2";
1	hq_isoforms.fasta.no5merge.collapsed.gff	exon	82190368	82190901	.	-	.	gene_id "AF:1:82187280-82190368:82190901:82187280-82197179:82197222:-"; transcript_id "AF:1:82187280-82190368:82190901:82187280-82197179:82197222:-:alternative2";
1	hq_isoforms.fasta.no5merge.collapsed.gff	exon	82187180	82187280	.	-	.	gene_id "AF:1:82187280-82190368:82190901:82187280-82197179:82197222:-"; transcript_id "AF:1:82187280-82190368:82190901:82187280-82197179:82197222:-:alternative1";
1	hq_isoforms.fasta.no5merge.collapsed.gff	exon	82197179	82197222	.	-	.	gene_id "AF:1:82187280-82190368:82190901:82187280-82197179:82197222:-"; transcript_id "AF:1:82187280-82190368:82190901:82187280-82197179:82197222:-:alternative1";
1	hq_isoforms.fasta.no5merge.collapsed.gff	exon	82187180	82187280	.	-	.	gene_id "AF:1:82187280-82190368:82190901:82187280-82191412:82191515:-"; transcript_id "AF:1:82187280-82190368:82190901:82187280-82191412:82191515:-:alternative2";
1	hq_isoforms.fasta.no5merge.collapsed.gff	exon	82190368	82190901	.	-	.	gene_id "AF:1:82187280-82190368:82190901:82187280-82191412:82191515:-"; transcript_id "AF:1:82187280-82190368:82190901:82187280-82191412:82191515:-:alternative2";
1	hq_isoforms.fasta.no5merge.collapsed.gff	exon	82187180	82187280	.	-	.	gene_id "AF:1:82187280-82190368:82190901:82187280-82191412:82191515:-"; transcript_id "AF:1:82187280-82190368:82190901:82187280-82191412:82191515:-:alternative1";
1	hq_isoforms.fasta.no5merge.collapsed.gff	exon	82191412	82191515	.	-	.	gene_id "AF:1:82187280-82190368:82190901:82187280-82191412:82191515:-"; transcript_id "AF:1:82187280-82190368:82190901:82187280-82191412:82191515:-:alternative1";
1	hq_isoforms.fasta.no5merge.collapsed.gff	exon	82187180	82187280	.	-	.	gene_id "AF:1:82187280-82191412:82191515:82187280-82197179:82197245:-"; transcript_id "AF:1:82187280-82191412:82191515:82187280-82197179:82197245:-:alternative2";
1	hq_isoforms.fasta.no5merge.collapsed.gff	exon	82191412	82191515	.	-	.	gene_id "AF:1:82187280-82191412:82191515:82187280-82197179:82197245:-"; transcript_id "AF:1:82187280-82191412:82191515:82187280-82197179:82197245:-:alternative2";
1	hq_isoforms.fasta.no5merge.collapsed.gff	exon	82187180	82187280	.	-	.	gene_id "AF:1:82187280-82191412:82191515:82187280-82197179:82197245:-"; transcript_id "AF:1:82187280-82191412:82191515:82187280-82197179:82197245:-:alternative1";
1	hq_isoforms.fasta.no5merge.collapsed.gff	exon	82197179	82197245	.	-	.	gene_id "AF:1:82187280-82191412:82191515:82187280-82197179:82197245:-"; transcript_id "AF:1:82187280-82191412:82191515:82187280-82197179:82197245:-:alternative1";
1	hq_isoforms.fasta.no5merge.collapsed.gff	exon	82187180	82187280	.	-	.	gene_id "AF:1:82187280-82191412:82191515:82187280-82197179:82197239:-"; transcript_id "AF:1:82187280-82191412:82191515:82187280-82197179:82197239:-:alternative2";
1	hq_isoforms.fasta.no5merge.collapsed.gff	exon	82191412	82191515	.	-	.	gene_id "AF:1:82187280-82191412:82191515:82187280-82197179:82197239:-"; transcript_id "AF:1:82187280-82191412:82191515:82187280-82197179:82197239:-:alternative2";
1	hq_isoforms.fasta.no5merge.collapsed.gff	exon	82187180	82187280	.	-	.	gene_id "AF:1:82187280-82191412:82191515:82187280-82197179:82197239:-"; transcript_id "AF:1:82187280-82191412:82191515:82187280-82197179:82197239:-:alternative1";
1	hq_isoforms.fasta.no5merge.collapsed.gff	exon	82197179	82197239	.	-	.	gene_id "AF:1:82187280-82191412:82191515:82187280-82197179:82197239:-"; transcript_id "AF:1:82187280-82191412:82191515:82187280-82197179:82197239:-:alternative1";
1	hq_isoforms.fasta.no5merge.collapsed.gff	exon	82187180	82187280	.	-	.	gene_id "AF:1:82187280-82191412:82191515:82187280-82197179:82197241:-"; transcript_id "AF:1:82187280-82191412:82191515:82187280-82197179:82197241:-:alternative2";
1	hq_isoforms.fasta.no5merge.collapsed.gff	exon	82191412	82191515	.	-	.	gene_id "AF:1:82187280-82191412:82191515:82187280-82197179:82197241:-"; transcript_id "AF:1:82187280-82191412:82191515:82187280-82197179:82197241:-:alternative2";
1	hq_isoforms.fasta.no5merge.collapsed.gff	exon	82187180	82187280	.	-	.	gene_id "AF:1:82187280-82191412:82191515:82187280-82197179:82197241:-"; transcript_id "AF:1:82187280-82191412:82191515:82187280-82197179:82197241:-:alternative1";
1	hq_isoforms.fasta.no5merge.collapsed.gff	exon	82197179	82197241	.	-	.	gene_id "AF:1:82187280-82191412:82191515:82187280-82197179:82197241:-"; transcript_id "AF:1:82187280-82191412:82191515:82187280-82197179:82197241:-:alternative1";
1	hq_isoforms.fasta.no5merge.collapsed.gff	exon	82187180	82187280	.	-	.	gene_id "AF:1:82187280-82191412:82191515:82187280-82197179:82197222:-"; transcript_id "AF:1:82187280-82191412:82191515:82187280-82197179:82197222:-:alternative2";
1	hq_isoforms.fasta.no5merge.collapsed.gff	exon	82191412	82191515	.	-	.	gene_id "AF:1:82187280-82191412:82191515:82187280-82197179:82197222:-"; transcript_id "AF:1:82187280-82191412:82191515:82187280-82197179:82197222:-:alternative2";
1	hq_isoforms.fasta.no5merge.collapsed.gff	exon	82187180	82187280	.	-	.	gene_id "AF:1:82187280-82191412:82191515:82187280-82197179:82197222:-"; transcript_id "AF:1:82187280-82191412:82191515:82187280-82197179:82197222:-:alternative1";
1	hq_isoforms.fasta.no5merge.collapsed.gff	exon	82197179	82197222	.	-	.	gene_id "AF:1:82187280-82191412:82191515:82187280-82197179:82197222:-"; transcript_id "AF:1:82187280-82191412:82191515:82187280-82197179:82197222:-:alternative1";
1	hq_isoforms.fasta.no5merge.collapsed.gff	exon	83466886	83466986	.	-	.	gene_id "AF:1:83466986-83472478:83472508:83466986-83473067:83473113:-"; transcript_id "AF:1:83466986-83472478:83472508:83466986-83473067:83473113:-:alternative2";
1	hq_isoforms.fasta.no5merge.collapsed.gff	exon	83472478	83472508	.	-	.	gene_id "AF:1:83466986-83472478:83472508:83466986-83473067:83473113:-"; transcript_id "AF:1:83466986-83472478:83472508:83466986-83473067:83473113:-:alternative2";
1	hq_isoforms.fasta.no5merge.collapsed.gff	exon	83466886	83466986	.	-	.	gene_id "AF:1:83466986-83472478:83472508:83466986-83473067:83473113:-"; transcript_id "AF:1:83466986-83472478:83472508:83466986-83473067:83473113:-:alternative1";
1	hq_isoforms.fasta.no5merge.collapsed.gff	exon	83473067	83473113	.	-	.	gene_id "AF:1:83466986-83472478:83472508:83466986-83473067:83473113:-"; transcript_id "AF:1:83466986-83472478:83472508:83466986-83473067:83473113:-:alternative1";
1	hq_isoforms.fasta.no5merge.collapsed.gff	exon	83466886	83466986	.	-	.	gene_id "AF:1:83466986-83472478:83472506:83466986-83473067:83473113:-"; transcript_id "AF:1:83466986-83472478:83472506:83466986-83473067:83473113:-:alternative2";
1	hq_isoforms.fasta.no5merge.collapsed.gff	exon	83472478	83472506	.	-	.	gene_id "AF:1:83466986-83472478:83472506:83466986-83473067:83473113:-"; transcript_id "AF:1:83466986-83472478:83472506:83466986-83473067:83473113:-:alternative2";
1	hq_isoforms.fasta.no5merge.collapsed.gff	exon	83466886	83466986	.	-	.	gene_id "AF:1:83466986-83472478:83472506:83466986-83473067:83473113:-"; transcript_id "AF:1:83466986-83472478:83472506:83466986-83473067:83473113:-:alternative1";
1	hq_isoforms.fasta.no5merge.collapsed.gff	exon	83473067	83473113	.	-	.	gene_id "AF:1:83466986-83472478:83472506:83466986-83473067:83473113:-"; transcript_id "AF:1:83466986-83472478:83472506:83466986-83473067:83473113:-:alternative1";
1	hq_isoforms.fasta.no5merge.collapsed.gff	exon	85918354	85918454	.	-	.	gene_id "AF:1:85918454-85918652:85919186:85918454-85919307:85919360:-"; transcript_id "AF:1:85918454-85918652:85919186:85918454-85919307:85919360:-:alternative2";
1	hq_isoforms.fasta.no5merge.collapsed.gff	exon	85918652	85919186	.	-	.	gene_id "AF:1:85918454-85918652:85919186:85918454-85919307:85919360:-"; transcript_id "AF:1:85918454-85918652:85919186:85918454-85919307:85919360:-:alternative2";
1	hq_isoforms.fasta.no5merge.collapsed.gff	exon	85918354	85918454	.	-	.	gene_id "AF:1:85918454-85918652:85919186:85918454-85919307:85919360:-"; transcript_id "AF:1:85918454-85918652:85919186:85918454-85919307:85919360:-:alternative1";
1	hq_isoforms.fasta.no5merge.collapsed.gff	exon	85919307	85919360	.	-	.	gene_id "AF:1:85918454-85918652:85919186:85918454-85919307:85919360:-"; transcript_id "AF:1:85918454-85918652:85919186:85918454-85919307:85919360:-:alternative1";
1	hq_isoforms.fasta.no5merge.collapsed.gff	exon	85959149	85959249	.	-	.	gene_id "AF:1:85959249-85961000:85961285:85959249-85963325:85963683:-"; transcript_id "AF:1:85959249-85961000:85961285:85959249-85963325:85963683:-:alternative2";
1	hq_isoforms.fasta.no5merge.collapsed.gff	exon	85961000	85961285	.	-	.	gene_id "AF:1:85959249-85961000:85961285:85959249-85963325:85963683:-"; transcript_id "AF:1:85959249-85961000:85961285:85959249-85963325:85963683:-:alternative2";
1	hq_isoforms.fasta.no5merge.collapsed.gff	exon	85959149	85959249	.	-	.	gene_id "AF:1:85959249-85961000:85961285:85959249-85963325:85963683:-"; transcript_id "AF:1:85959249-85961000:85961285:85959249-85963325:85963683:-:alternative1";
1	hq_isoforms.fasta.no5merge.collapsed.gff	exon	85963325	85963683	.	-	.	gene_id "AF:1:85959249-85961000:85961285:85959249-85963325:85963683:-"; transcript_id "AF:1:85959249-85961000:85961285:85959249-85963325:85963683:-:alternative1";
1	hq_isoforms.fasta.no5merge.collapsed.gff	exon	86066937	86067037	.	-	.	gene_id "AF:1:86067037-86086285:86086738:86067037-86090218:86090674:-"; transcript_id "AF:1:86067037-86086285:86086738:86067037-86090218:86090674:-:alternative2";
1	hq_isoforms.fasta.no5merge.collapsed.gff	exon	86086285	86086738	.	-	.	gene_id "AF:1:86067037-86086285:86086738:86067037-86090218:86090674:-"; transcript_id "AF:1:86067037-86086285:86086738:86067037-86090218:86090674:-:alternative2";
1	hq_isoforms.fasta.no5merge.collapsed.gff	exon	86066937	86067037	.	-	.	gene_id "AF:1:86067037-86086285:86086738:86067037-86090218:86090674:-"; transcript_id "AF:1:86067037-86086285:86086738:86067037-86090218:86090674:-:alternative1";
1	hq_isoforms.fasta.no5merge.collapsed.gff	exon	86090218	86090674	.	-	.	gene_id "AF:1:86067037-86086285:86086738:86067037-86090218:86090674:-"; transcript_id "AF:1:86067037-86086285:86086738:86067037-86090218:86090674:-:alternative1";
1	hq_isoforms.fasta.no5merge.collapsed.gff	exon	86424869	86424969	.	-	.	gene_id "AF:1:86424969-86425057:86425598:86424969-86425658:86425678:-"; transcript_id "AF:1:86424969-86425057:86425598:86424969-86425658:86425678:-:alternative2";
1	hq_isoforms.fasta.no5merge.collapsed.gff	exon	86425057	86425598	.	-	.	gene_id "AF:1:86424969-86425057:86425598:86424969-86425658:86425678:-"; transcript_id "AF:1:86424969-86425057:86425598:86424969-86425658:86425678:-:alternative2";
1	hq_isoforms.fasta.no5merge.collapsed.gff	exon	86424869	86424969	.	-	.	gene_id "AF:1:86424969-86425057:86425598:86424969-86425658:86425678:-"; transcript_id "AF:1:86424969-86425057:86425598:86424969-86425658:86425678:-:alternative1";
1	hq_isoforms.fasta.no5merge.collapsed.gff	exon	86425658	86425678	.	-	.	gene_id "AF:1:86424969-86425057:86425598:86424969-86425658:86425678:-"; transcript_id "AF:1:86424969-86425057:86425598:86424969-86425658:86425678:-:alternative1";
1	hq_isoforms.fasta.no5merge.collapsed.gff	exon	88092469	88092569	.	-	.	gene_id "AF:1:88092569-88093385:88093469:88092569-88093500:88093523:-"; transcript_id "AF:1:88092569-88093385:88093469:88092569-88093500:88093523:-:alternative2";
1	hq_isoforms.fasta.no5merge.collapsed.gff	exon	88093385	88093469	.	-	.	gene_id "AF:1:88092569-88093385:88093469:88092569-88093500:88093523:-"; transcript_id "AF:1:88092569-88093385:88093469:88092569-88093500:88093523:-:alternative2";
1	hq_isoforms.fasta.no5merge.collapsed.gff	exon	88092469	88092569	.	-	.	gene_id "AF:1:88092569-88093385:88093469:88092569-88093500:88093523:-"; transcript_id "AF:1:88092569-88093385:88093469:88092569-88093500:88093523:-:alternative1";
1	hq_isoforms.fasta.no5merge.collapsed.gff	exon	88093500	88093523	.	-	.	gene_id "AF:1:88092569-88093385:88093469:88092569-88093500:88093523:-"; transcript_id "AF:1:88092569-88093385:88093469:88092569-88093500:88093523:-:alternative1";
1	hq_isoforms.fasta.no5merge.collapsed.gff	exon	88092469	88092569	.	-	.	gene_id "AF:1:88092569-88093385:88093469:88092569-88093500:88093540:-"; transcript_id "AF:1:88092569-88093385:88093469:88092569-88093500:88093540:-:alternative2";
1	hq_isoforms.fasta.no5merge.collapsed.gff	exon	88093385	88093469	.	-	.	gene_id "AF:1:88092569-88093385:88093469:88092569-88093500:88093540:-"; transcript_id "AF:1:88092569-88093385:88093469:88092569-88093500:88093540:-:alternative2";
1	hq_isoforms.fasta.no5merge.collapsed.gff	exon	88092469	88092569	.	-	.	gene_id "AF:1:88092569-88093385:88093469:88092569-88093500:88093540:-"; transcript_id "AF:1:88092569-88093385:88093469:88092569-88093500:88093540:-:alternative1";
1	hq_isoforms.fasta.no5merge.collapsed.gff	exon	88093500	88093540	.	-	.	gene_id "AF:1:88092569-88093385:88093469:88092569-88093500:88093540:-"; transcript_id "AF:1:88092569-88093385:88093469:88092569-88093500:88093540:-:alternative1";
1	hq_isoforms.fasta.no5merge.collapsed.gff	exon	88092469	88092569	.	-	.	gene_id "AF:1:88092569-88093385:88093469:88092569-88093500:88093571:-"; transcript_id "AF:1:88092569-88093385:88093469:88092569-88093500:88093571:-:alternative2";
1	hq_isoforms.fasta.no5merge.collapsed.gff	exon	88093385	88093469	.	-	.	gene_id "AF:1:88092569-88093385:88093469:88092569-88093500:88093571:-"; transcript_id "AF:1:88092569-88093385:88093469:88092569-88093500:88093571:-:alternative2";
1	hq_isoforms.fasta.no5merge.collapsed.gff	exon	88092469	88092569	.	-	.	gene_id "AF:1:88092569-88093385:88093469:88092569-88093500:88093571:-"; transcript_id "AF:1:88092569-88093385:88093469:88092569-88093500:88093571:-:alternative1";
1	hq_isoforms.fasta.no5merge.collapsed.gff	exon	88093500	88093571	.	-	.	gene_id "AF:1:88092569-88093385:88093469:88092569-88093500:88093571:-"; transcript_id "AF:1:88092569-88093385:88093469:88092569-88093500:88093571:-:alternative1";
1	hq_isoforms.fasta.no5merge.collapsed.gff	exon	88092469	88092569	.	-	.	gene_id "AF:1:88092569-88093385:88093469:88092569-88093500:88093514:-"; transcript_id "AF:1:88092569-88093385:88093469:88092569-88093500:88093514:-:alternative2";
1	hq_isoforms.fasta.no5merge.collapsed.gff	exon	88093385	88093469	.	-	.	gene_id "AF:1:88092569-88093385:88093469:88092569-88093500:88093514:-"; transcript_id "AF:1:88092569-88093385:88093469:88092569-88093500:88093514:-:alternative2";
1	hq_isoforms.fasta.no5merge.collapsed.gff	exon	88092469	88092569	.	-	.	gene_id "AF:1:88092569-88093385:88093469:88092569-88093500:88093514:-"; transcript_id "AF:1:88092569-88093385:88093469:88092569-88093500:88093514:-:alternative1";
1	hq_isoforms.fasta.no5merge.collapsed.gff	exon	88093500	88093514	.	-	.	gene_id "AF:1:88092569-88093385:88093469:88092569-88093500:88093514:-"; transcript_id "AF:1:88092569-88093385:88093469:88092569-88093500:88093514:-:alternative1";
1	hq_isoforms.fasta.no5merge.collapsed.gff	exon	91585146	91585246	.	-	.	gene_id "AF:1:91585246-91588867:91589056:91585246-91589106:91589140:-"; transcript_id "AF:1:91585246-91588867:91589056:91585246-91589106:91589140:-:alternative2";
1	hq_isoforms.fasta.no5merge.collapsed.gff	exon	91588867	91589056	.	-	.	gene_id "AF:1:91585246-91588867:91589056:91585246-91589106:91589140:-"; transcript_id "AF:1:91585246-91588867:91589056:91585246-91589106:91589140:-:alternative2";
1	hq_isoforms.fasta.no5merge.collapsed.gff	exon	91585146	91585246	.	-	.	gene_id "AF:1:91585246-91588867:91589056:91585246-91589106:91589140:-"; transcript_id "AF:1:91585246-91588867:91589056:91585246-91589106:91589140:-:alternative1";
1	hq_isoforms.fasta.no5merge.collapsed.gff	exon	91589106	91589140	.	-	.	gene_id "AF:1:91585246-91588867:91589056:91585246-91589106:91589140:-"; transcript_id "AF:1:91585246-91588867:91589056:91585246-91589106:91589140:-:alternative1";
1	hq_isoforms.fasta.no5merge.collapsed.gff	exon	91585146	91585246	.	-	.	gene_id "AF:1:91585246-91588867:91589056:91585246-91589106:91589143:-"; transcript_id "AF:1:91585246-91588867:91589056:91585246-91589106:91589143:-:alternative2";
1	hq_isoforms.fasta.no5merge.collapsed.gff	exon	91588867	91589056	.	-	.	gene_id "AF:1:91585246-91588867:91589056:91585246-91589106:91589143:-"; transcript_id "AF:1:91585246-91588867:91589056:91585246-91589106:91589143:-:alternative2";
1	hq_isoforms.fasta.no5merge.collapsed.gff	exon	91585146	91585246	.	-	.	gene_id "AF:1:91585246-91588867:91589056:91585246-91589106:91589143:-"; transcript_id "AF:1:91585246-91588867:91589056:91585246-91589106:91589143:-:alternative1";
1	hq_isoforms.fasta.no5merge.collapsed.gff	exon	91589106	91589143	.	-	.	gene_id "AF:1:91585246-91588867:91589056:91585246-91589106:91589143:-"; transcript_id "AF:1:91585246-91588867:91589056:91585246-91589106:91589143:-:alternative1";
1	hq_isoforms.fasta.no5merge.collapsed.gff	exon	91585146	91585246	.	-	.	gene_id "AF:1:91585246-91588867:91589056:91585246-91589106:91589136:-"; transcript_id "AF:1:91585246-91588867:91589056:91585246-91589106:91589136:-:alternative2";
1	hq_isoforms.fasta.no5merge.collapsed.gff	exon	91588867	91589056	.	-	.	gene_id "AF:1:91585246-91588867:91589056:91585246-91589106:91589136:-"; transcript_id "AF:1:91585246-91588867:91589056:91585246-91589106:91589136:-:alternative2";
1	hq_isoforms.fasta.no5merge.collapsed.gff	exon	91585146	91585246	.	-	.	gene_id "AF:1:91585246-91588867:91589056:91585246-91589106:91589136:-"; transcript_id "AF:1:91585246-91588867:91589056:91585246-91589106:91589136:-:alternative1";
1	hq_isoforms.fasta.no5merge.collapsed.gff	exon	91589106	91589136	.	-	.	gene_id "AF:1:91585246-91588867:91589056:91585246-91589106:91589136:-"; transcript_id "AF:1:91585246-91588867:91589056:91585246-91589106:91589136:-:alternative1";
1	hq_isoforms.fasta.no5merge.collapsed.gff	exon	92648767	92648867	.	-	.	gene_id "AF:1:92648867-92651299:92651621:92648867-92651743:92651828:-"; transcript_id "AF:1:92648867-92651299:92651621:92648867-92651743:92651828:-:alternative2";
1	hq_isoforms.fasta.no5merge.collapsed.gff	exon	92651299	92651621	.	-	.	gene_id "AF:1:92648867-92651299:92651621:92648867-92651743:92651828:-"; transcript_id "AF:1:92648867-92651299:92651621:92648867-92651743:92651828:-:alternative2";
1	hq_isoforms.fasta.no5merge.collapsed.gff	exon	92648767	92648867	.	-	.	gene_id "AF:1:92648867-92651299:92651621:92648867-92651743:92651828:-"; transcript_id "AF:1:92648867-92651299:92651621:92648867-92651743:92651828:-:alternative1";
1	hq_isoforms.fasta.no5merge.collapsed.gff	exon	92651743	92651828	.	-	.	gene_id "AF:1:92648867-92651299:92651621:92648867-92651743:92651828:-"; transcript_id "AF:1:92648867-92651299:92651621:92648867-92651743:92651828:-:alternative1";
1	hq_isoforms.fasta.no5merge.collapsed.gff	exon	92648767	92648867	.	-	.	gene_id "AF:1:92648867-92651299:92651621:92648867-92651743:92651841:-"; transcript_id "AF:1:92648867-92651299:92651621:92648867-92651743:92651841:-:alternative2";
1	hq_isoforms.fasta.no5merge.collapsed.gff	exon	92651299	92651621	.	-	.	gene_id "AF:1:92648867-92651299:92651621:92648867-92651743:92651841:-"; transcript_id "AF:1:92648867-92651299:92651621:92648867-92651743:92651841:-:alternative2";
1	hq_isoforms.fasta.no5merge.collapsed.gff	exon	92648767	92648867	.	-	.	gene_id "AF:1:92648867-92651299:92651621:92648867-92651743:92651841:-"; transcript_id "AF:1:92648867-92651299:92651621:92648867-92651743:92651841:-:alternative1";
1	hq_isoforms.fasta.no5merge.collapsed.gff	exon	92651743	92651841	.	-	.	gene_id "AF:1:92648867-92651299:92651621:92648867-92651743:92651841:-"; transcript_id "AF:1:92648867-92651299:92651621:92648867-92651743:92651841:-:alternative1";
1	hq_isoforms.fasta.no5merge.collapsed.gff	exon	93062182	93062282	.	-	.	gene_id "AF:1:93062282-93087227:93087543:93062282-93087696:93088001:-"; transcript_id "AF:1:93062282-93087227:93087543:93062282-93087696:93088001:-:alternative2";
1	hq_isoforms.fasta.no5merge.collapsed.gff	exon	93087227	93087543	.	-	.	gene_id "AF:1:93062282-93087227:93087543:93062282-93087696:93088001:-"; transcript_id "AF:1:93062282-93087227:93087543:93062282-93087696:93088001:-:alternative2";
1	hq_isoforms.fasta.no5merge.collapsed.gff	exon	93062182	93062282	.	-	.	gene_id "AF:1:93062282-93087227:93087543:93062282-93087696:93088001:-"; transcript_id "AF:1:93062282-93087227:93087543:93062282-93087696:93088001:-:alternative1";
1	hq_isoforms.fasta.no5merge.collapsed.gff	exon	93087696	93088001	.	-	.	gene_id "AF:1:93062282-93087227:93087543:93062282-93087696:93088001:-"; transcript_id "AF:1:93062282-93087227:93087543:93062282-93087696:93088001:-:alternative1";
1	hq_isoforms.fasta.no5merge.collapsed.gff	exon	93062182	93062282	.	-	.	gene_id "AF:1:93062282-93087227:93087543:93062282-93087696:93087910:-"; transcript_id "AF:1:93062282-93087227:93087543:93062282-93087696:93087910:-:alternative2";
1	hq_isoforms.fasta.no5merge.collapsed.gff	exon	93087227	93087543	.	-	.	gene_id "AF:1:93062282-93087227:93087543:93062282-93087696:93087910:-"; transcript_id "AF:1:93062282-93087227:93087543:93062282-93087696:93087910:-:alternative2";
1	hq_isoforms.fasta.no5merge.collapsed.gff	exon	93062182	93062282	.	-	.	gene_id "AF:1:93062282-93087227:93087543:93062282-93087696:93087910:-"; transcript_id "AF:1:93062282-93087227:93087543:93062282-93087696:93087910:-:alternative1";
1	hq_isoforms.fasta.no5merge.collapsed.gff	exon	93087696	93087910	.	-	.	gene_id "AF:1:93062282-93087227:93087543:93062282-93087696:93087910:-"; transcript_id "AF:1:93062282-93087227:93087543:93062282-93087696:93087910:-:alternative1";
1	hq_isoforms.fasta.no5merge.collapsed.gff	exon	93062182	93062282	.	-	.	gene_id "AF:1:93062282-93087227:93087543:93062282-93087696:93087922:-"; transcript_id "AF:1:93062282-93087227:93087543:93062282-93087696:93087922:-:alternative2";
1	hq_isoforms.fasta.no5merge.collapsed.gff	exon	93087227	93087543	.	-	.	gene_id "AF:1:93062282-93087227:93087543:93062282-93087696:93087922:-"; transcript_id "AF:1:93062282-93087227:93087543:93062282-93087696:93087922:-:alternative2";
1	hq_isoforms.fasta.no5merge.collapsed.gff	exon	93062182	93062282	.	-	.	gene_id "AF:1:93062282-93087227:93087543:93062282-93087696:93087922:-"; transcript_id "AF:1:93062282-93087227:93087543:93062282-93087696:93087922:-:alternative1";
1	hq_isoforms.fasta.no5merge.collapsed.gff	exon	93087696	93087922	.	-	.	gene_id "AF:1:93062282-93087227:93087543:93062282-93087696:93087922:-"; transcript_id "AF:1:93062282-93087227:93087543:93062282-93087696:93087922:-:alternative1";
1	hq_isoforms.fasta.no5merge.collapsed.gff	exon	93062182	93062282	.	-	.	gene_id "AF:1:93062282-93087227:93087543:93062282-93087696:93087921:-"; transcript_id "AF:1:93062282-93087227:93087543:93062282-93087696:93087921:-:alternative2";
1	hq_isoforms.fasta.no5merge.collapsed.gff	exon	93087227	93087543	.	-	.	gene_id "AF:1:93062282-93087227:93087543:93062282-93087696:93087921:-"; transcript_id "AF:1:93062282-93087227:93087543:93062282-93087696:93087921:-:alternative2";
1	hq_isoforms.fasta.no5merge.collapsed.gff	exon	93062182	93062282	.	-	.	gene_id "AF:1:93062282-93087227:93087543:93062282-93087696:93087921:-"; transcript_id "AF:1:93062282-93087227:93087543:93062282-93087696:93087921:-:alternative1";
1	hq_isoforms.fasta.no5merge.collapsed.gff	exon	93087696	93087921	.	-	.	gene_id "AF:1:93062282-93087227:93087543:93062282-93087696:93087921:-"; transcript_id "AF:1:93062282-93087227:93087543:93062282-93087696:93087921:-:alternative1";
1	hq_isoforms.fasta.no5merge.collapsed.gff	exon	94172120	94172220	.	-	.	gene_id "AF:1:94172220-94173831:94174027:94172220-94174413:94174436:-"; transcript_id "AF:1:94172220-94173831:94174027:94172220-94174413:94174436:-:alternative2";
1	hq_isoforms.fasta.no5merge.collapsed.gff	exon	94173831	94174027	.	-	.	gene_id "AF:1:94172220-94173831:94174027:94172220-94174413:94174436:-"; transcript_id "AF:1:94172220-94173831:94174027:94172220-94174413:94174436:-:alternative2";
1	hq_isoforms.fasta.no5merge.collapsed.gff	exon	94172120	94172220	.	-	.	gene_id "AF:1:94172220-94173831:94174027:94172220-94174413:94174436:-"; transcript_id "AF:1:94172220-94173831:94174027:94172220-94174413:94174436:-:alternative1";
1	hq_isoforms.fasta.no5merge.collapsed.gff	exon	94174413	94174436	.	-	.	gene_id "AF:1:94172220-94173831:94174027:94172220-94174413:94174436:-"; transcript_id "AF:1:94172220-94173831:94174027:94172220-94174413:94174436:-:alternative1";
1	hq_isoforms.fasta.no5merge.collapsed.gff	exon	94172120	94172220	.	-	.	gene_id "AF:1:94172220-94173831:94174366:94172220-94174413:94174436:-"; transcript_id "AF:1:94172220-94173831:94174366:94172220-94174413:94174436:-:alternative2";
1	hq_isoforms.fasta.no5merge.collapsed.gff	exon	94173831	94174366	.	-	.	gene_id "AF:1:94172220-94173831:94174366:94172220-94174413:94174436:-"; transcript_id "AF:1:94172220-94173831:94174366:94172220-94174413:94174436:-:alternative2";
1	hq_isoforms.fasta.no5merge.collapsed.gff	exon	94172120	94172220	.	-	.	gene_id "AF:1:94172220-94173831:94174366:94172220-94174413:94174436:-"; transcript_id "AF:1:94172220-94173831:94174366:94172220-94174413:94174436:-:alternative1";
1	hq_isoforms.fasta.no5merge.collapsed.gff	exon	94174413	94174436	.	-	.	gene_id "AF:1:94172220-94173831:94174366:94172220-94174413:94174436:-"; transcript_id "AF:1:94172220-94173831:94174366:94172220-94174413:94174436:-:alternative1";
1	hq_isoforms.fasta.no5merge.collapsed.gff	exon	94312918	94313018	.	-	.	gene_id "AF:1:94313018-94324708:94325251:94313018-94325317:94325587:-"; transcript_id "AF:1:94313018-94324708:94325251:94313018-94325317:94325587:-:alternative2";
1	hq_isoforms.fasta.no5merge.collapsed.gff	exon	94324708	94325251	.	-	.	gene_id "AF:1:94313018-94324708:94325251:94313018-94325317:94325587:-"; transcript_id "AF:1:94313018-94324708:94325251:94313018-94325317:94325587:-:alternative2";
1	hq_isoforms.fasta.no5merge.collapsed.gff	exon	94312918	94313018	.	-	.	gene_id "AF:1:94313018-94324708:94325251:94313018-94325317:94325587:-"; transcript_id "AF:1:94313018-94324708:94325251:94313018-94325317:94325587:-:alternative1";
1	hq_isoforms.fasta.no5merge.collapsed.gff	exon	94325317	94325587	.	-	.	gene_id "AF:1:94313018-94324708:94325251:94313018-94325317:94325587:-"; transcript_id "AF:1:94313018-94324708:94325251:94313018-94325317:94325587:-:alternative1";
1	hq_isoforms.fasta.no5merge.collapsed.gff	exon	94312918	94313018	.	-	.	gene_id "AF:1:94313018-94324708:94325251:94313018-94325317:94325467:-"; transcript_id "AF:1:94313018-94324708:94325251:94313018-94325317:94325467:-:alternative2";
1	hq_isoforms.fasta.no5merge.collapsed.gff	exon	94324708	94325251	.	-	.	gene_id "AF:1:94313018-94324708:94325251:94313018-94325317:94325467:-"; transcript_id "AF:1:94313018-94324708:94325251:94313018-94325317:94325467:-:alternative2";
1	hq_isoforms.fasta.no5merge.collapsed.gff	exon	94312918	94313018	.	-	.	gene_id "AF:1:94313018-94324708:94325251:94313018-94325317:94325467:-"; transcript_id "AF:1:94313018-94324708:94325251:94313018-94325317:94325467:-:alternative1";
1	hq_isoforms.fasta.no5merge.collapsed.gff	exon	94325317	94325467	.	-	.	gene_id "AF:1:94313018-94324708:94325251:94313018-94325317:94325467:-"; transcript_id "AF:1:94313018-94324708:94325251:94313018-94325317:94325467:-:alternative1";
1	hq_isoforms.fasta.no5merge.collapsed.gff	exon	94312918	94313018	.	-	.	gene_id "AF:1:94313018-94324708:94325251:94313018-94325317:94325491:-"; transcript_id "AF:1:94313018-94324708:94325251:94313018-94325317:94325491:-:alternative2";
1	hq_isoforms.fasta.no5merge.collapsed.gff	exon	94324708	94325251	.	-	.	gene_id "AF:1:94313018-94324708:94325251:94313018-94325317:94325491:-"; transcript_id "AF:1:94313018-94324708:94325251:94313018-94325317:94325491:-:alternative2";
1	hq_isoforms.fasta.no5merge.collapsed.gff	exon	94312918	94313018	.	-	.	gene_id "AF:1:94313018-94324708:94325251:94313018-94325317:94325491:-"; transcript_id "AF:1:94313018-94324708:94325251:94313018-94325317:94325491:-:alternative1";
1	hq_isoforms.fasta.no5merge.collapsed.gff	exon	94325317	94325491	.	-	.	gene_id "AF:1:94313018-94324708:94325251:94313018-94325317:94325491:-"; transcript_id "AF:1:94313018-94324708:94325251:94313018-94325317:94325491:-:alternative1";
1	hq_isoforms.fasta.no5merge.collapsed.gff	exon	94312918	94313018	.	-	.	gene_id "AF:1:94313018-94324708:94325251:94313018-94325317:94325492:-"; transcript_id "AF:1:94313018-94324708:94325251:94313018-94325317:94325492:-:alternative2";
1	hq_isoforms.fasta.no5merge.collapsed.gff	exon	94324708	94325251	.	-	.	gene_id "AF:1:94313018-94324708:94325251:94313018-94325317:94325492:-"; transcript_id "AF:1:94313018-94324708:94325251:94313018-94325317:94325492:-:alternative2";
1	hq_isoforms.fasta.no5merge.collapsed.gff	exon	94312918	94313018	.	-	.	gene_id "AF:1:94313018-94324708:94325251:94313018-94325317:94325492:-"; transcript_id "AF:1:94313018-94324708:94325251:94313018-94325317:94325492:-:alternative1";
1	hq_isoforms.fasta.no5merge.collapsed.gff	exon	94325317	94325492	.	-	.	gene_id "AF:1:94313018-94324708:94325251:94313018-94325317:94325492:-"; transcript_id "AF:1:94313018-94324708:94325251:94313018-94325317:94325492:-:alternative1";
1	hq_isoforms.fasta.no5merge.collapsed.gff	exon	94312918	94313018	.	-	.	gene_id "AF:1:94313018-94324708:94325251:94313018-94325317:94325427:-"; transcript_id "AF:1:94313018-94324708:94325251:94313018-94325317:94325427:-:alternative2";
1	hq_isoforms.fasta.no5merge.collapsed.gff	exon	94324708	94325251	.	-	.	gene_id "AF:1:94313018-94324708:94325251:94313018-94325317:94325427:-"; transcript_id "AF:1:94313018-94324708:94325251:94313018-94325317:94325427:-:alternative2";
1	hq_isoforms.fasta.no5merge.collapsed.gff	exon	94312918	94313018	.	-	.	gene_id "AF:1:94313018-94324708:94325251:94313018-94325317:94325427:-"; transcript_id "AF:1:94313018-94324708:94325251:94313018-94325317:94325427:-:alternative1";
1	hq_isoforms.fasta.no5merge.collapsed.gff	exon	94325317	94325427	.	-	.	gene_id "AF:1:94313018-94324708:94325251:94313018-94325317:94325427:-"; transcript_id "AF:1:94313018-94324708:94325251:94313018-94325317:94325427:-:alternative1";
1	hq_isoforms.fasta.no5merge.collapsed.gff	exon	94312918	94313018	.	-	.	gene_id "AF:1:94313018-94324708:94325251:94313018-94325317:94325484:-"; transcript_id "AF:1:94313018-94324708:94325251:94313018-94325317:94325484:-:alternative2";
1	hq_isoforms.fasta.no5merge.collapsed.gff	exon	94324708	94325251	.	-	.	gene_id "AF:1:94313018-94324708:94325251:94313018-94325317:94325484:-"; transcript_id "AF:1:94313018-94324708:94325251:94313018-94325317:94325484:-:alternative2";
1	hq_isoforms.fasta.no5merge.collapsed.gff	exon	94312918	94313018	.	-	.	gene_id "AF:1:94313018-94324708:94325251:94313018-94325317:94325484:-"; transcript_id "AF:1:94313018-94324708:94325251:94313018-94325317:94325484:-:alternative1";
1	hq_isoforms.fasta.no5merge.collapsed.gff	exon	94325317	94325484	.	-	.	gene_id "AF:1:94313018-94324708:94325251:94313018-94325317:94325484:-"; transcript_id "AF:1:94313018-94324708:94325251:94313018-94325317:94325484:-:alternative1";
1	hq_isoforms.fasta.no5merge.collapsed.gff	exon	94312918	94313018	.	-	.	gene_id "AF:1:94313018-94324708:94325251:94313018-94325317:94325378:-"; transcript_id "AF:1:94313018-94324708:94325251:94313018-94325317:94325378:-:alternative2";
1	hq_isoforms.fasta.no5merge.collapsed.gff	exon	94324708	94325251	.	-	.	gene_id "AF:1:94313018-94324708:94325251:94313018-94325317:94325378:-"; transcript_id "AF:1:94313018-94324708:94325251:94313018-94325317:94325378:-:alternative2";
1	hq_isoforms.fasta.no5merge.collapsed.gff	exon	94312918	94313018	.	-	.	gene_id "AF:1:94313018-94324708:94325251:94313018-94325317:94325378:-"; transcript_id "AF:1:94313018-94324708:94325251:94313018-94325317:94325378:-:alternative1";
1	hq_isoforms.fasta.no5merge.collapsed.gff	exon	94325317	94325378	.	-	.	gene_id "AF:1:94313018-94324708:94325251:94313018-94325317:94325378:-"; transcript_id "AF:1:94313018-94324708:94325251:94313018-94325317:94325378:-:alternative1";
1	hq_isoforms.fasta.no5merge.collapsed.gff	exon	94312918	94313018	.	-	.	gene_id "AF:1:94313018-94324708:94325251:94313018-94325317:94325426:-"; transcript_id "AF:1:94313018-94324708:94325251:94313018-94325317:94325426:-:alternative2";
1	hq_isoforms.fasta.no5merge.collapsed.gff	exon	94324708	94325251	.	-	.	gene_id "AF:1:94313018-94324708:94325251:94313018-94325317:94325426:-"; transcript_id "AF:1:94313018-94324708:94325251:94313018-94325317:94325426:-:alternative2";
1	hq_isoforms.fasta.no5merge.collapsed.gff	exon	94312918	94313018	.	-	.	gene_id "AF:1:94313018-94324708:94325251:94313018-94325317:94325426:-"; transcript_id "AF:1:94313018-94324708:94325251:94313018-94325317:94325426:-:alternative1";
1	hq_isoforms.fasta.no5merge.collapsed.gff	exon	94325317	94325426	.	-	.	gene_id "AF:1:94313018-94324708:94325251:94313018-94325317:94325426:-"; transcript_id "AF:1:94313018-94324708:94325251:94313018-94325317:94325426:-:alternative1";
1	hq_isoforms.fasta.no5merge.collapsed.gff	exon	94312918	94313018	.	-	.	gene_id "AF:1:94313018-94324708:94325251:94313018-94325317:94325515:-"; transcript_id "AF:1:94313018-94324708:94325251:94313018-94325317:94325515:-:alternative2";
1	hq_isoforms.fasta.no5merge.collapsed.gff	exon	94324708	94325251	.	-	.	gene_id "AF:1:94313018-94324708:94325251:94313018-94325317:94325515:-"; transcript_id "AF:1:94313018-94324708:94325251:94313018-94325317:94325515:-:alternative2";
1	hq_isoforms.fasta.no5merge.collapsed.gff	exon	94312918	94313018	.	-	.	gene_id "AF:1:94313018-94324708:94325251:94313018-94325317:94325515:-"; transcript_id "AF:1:94313018-94324708:94325251:94313018-94325317:94325515:-:alternative1";
1	hq_isoforms.fasta.no5merge.collapsed.gff	exon	94325317	94325515	.	-	.	gene_id "AF:1:94313018-94324708:94325251:94313018-94325317:94325515:-"; transcript_id "AF:1:94313018-94324708:94325251:94313018-94325317:94325515:-:alternative1";
1	hq_isoforms.fasta.no5merge.collapsed.gff	exon	94312918	94313018	.	-	.	gene_id "AF:1:94313018-94324708:94325251:94313018-94325317:94325487:-"; transcript_id "AF:1:94313018-94324708:94325251:94313018-94325317:94325487:-:alternative2";
1	hq_isoforms.fasta.no5merge.collapsed.gff	exon	94324708	94325251	.	-	.	gene_id "AF:1:94313018-94324708:94325251:94313018-94325317:94325487:-"; transcript_id "AF:1:94313018-94324708:94325251:94313018-94325317:94325487:-:alternative2";
1	hq_isoforms.fasta.no5merge.collapsed.gff	exon	94312918	94313018	.	-	.	gene_id "AF:1:94313018-94324708:94325251:94313018-94325317:94325487:-"; transcript_id "AF:1:94313018-94324708:94325251:94313018-94325317:94325487:-:alternative1";
1	hq_isoforms.fasta.no5merge.collapsed.gff	exon	94325317	94325487	.	-	.	gene_id "AF:1:94313018-94324708:94325251:94313018-94325317:94325487:-"; transcript_id "AF:1:94313018-94324708:94325251:94313018-94325317:94325487:-:alternative1";
1	hq_isoforms.fasta.no5merge.collapsed.gff	exon	94312918	94313018	.	-	.	gene_id "AF:1:94313018-94324708:94325251:94313018-94325317:94325516:-"; transcript_id "AF:1:94313018-94324708:94325251:94313018-94325317:94325516:-:alternative2";
1	hq_isoforms.fasta.no5merge.collapsed.gff	exon	94324708	94325251	.	-	.	gene_id "AF:1:94313018-94324708:94325251:94313018-94325317:94325516:-"; transcript_id "AF:1:94313018-94324708:94325251:94313018-94325317:94325516:-:alternative2";
1	hq_isoforms.fasta.no5merge.collapsed.gff	exon	94312918	94313018	.	-	.	gene_id "AF:1:94313018-94324708:94325251:94313018-94325317:94325516:-"; transcript_id "AF:1:94313018-94324708:94325251:94313018-94325317:94325516:-:alternative1";
1	hq_isoforms.fasta.no5merge.collapsed.gff	exon	94325317	94325516	.	-	.	gene_id "AF:1:94313018-94324708:94325251:94313018-94325317:94325516:-"; transcript_id "AF:1:94313018-94324708:94325251:94313018-94325317:94325516:-:alternative1";
1	hq_isoforms.fasta.no5merge.collapsed.gff	exon	94312918	94313018	.	-	.	gene_id "AF:1:94313018-94324708:94325251:94313018-94325317:94325510:-"; transcript_id "AF:1:94313018-94324708:94325251:94313018-94325317:94325510:-:alternative2";
1	hq_isoforms.fasta.no5merge.collapsed.gff	exon	94324708	94325251	.	-	.	gene_id "AF:1:94313018-94324708:94325251:94313018-94325317:94325510:-"; transcript_id "AF:1:94313018-94324708:94325251:94313018-94325317:94325510:-:alternative2";
1	hq_isoforms.fasta.no5merge.collapsed.gff	exon	94312918	94313018	.	-	.	gene_id "AF:1:94313018-94324708:94325251:94313018-94325317:94325510:-"; transcript_id "AF:1:94313018-94324708:94325251:94313018-94325317:94325510:-:alternative1";
1	hq_isoforms.fasta.no5merge.collapsed.gff	exon	94325317	94325510	.	-	.	gene_id "AF:1:94313018-94324708:94325251:94313018-94325317:94325510:-"; transcript_id "AF:1:94313018-94324708:94325251:94313018-94325317:94325510:-:alternative1";
1	hq_isoforms.fasta.no5merge.collapsed.gff	exon	94312918	94313018	.	-	.	gene_id "AF:1:94313018-94324708:94325251:94313018-94325317:94325577:-"; transcript_id "AF:1:94313018-94324708:94325251:94313018-94325317:94325577:-:alternative2";
1	hq_isoforms.fasta.no5merge.collapsed.gff	exon	94324708	94325251	.	-	.	gene_id "AF:1:94313018-94324708:94325251:94313018-94325317:94325577:-"; transcript_id "AF:1:94313018-94324708:94325251:94313018-94325317:94325577:-:alternative2";
1	hq_isoforms.fasta.no5merge.collapsed.gff	exon	94312918	94313018	.	-	.	gene_id "AF:1:94313018-94324708:94325251:94313018-94325317:94325577:-"; transcript_id "AF:1:94313018-94324708:94325251:94313018-94325317:94325577:-:alternative1";
1	hq_isoforms.fasta.no5merge.collapsed.gff	exon	94325317	94325577	.	-	.	gene_id "AF:1:94313018-94324708:94325251:94313018-94325317:94325577:-"; transcript_id "AF:1:94313018-94324708:94325251:94313018-94325317:94325577:-:alternative1";
1	hq_isoforms.fasta.no5merge.collapsed.gff	exon	94312918	94313018	.	-	.	gene_id "AF:1:94313018-94324708:94325251:94313018-94325317:94325490:-"; transcript_id "AF:1:94313018-94324708:94325251:94313018-94325317:94325490:-:alternative2";
1	hq_isoforms.fasta.no5merge.collapsed.gff	exon	94324708	94325251	.	-	.	gene_id "AF:1:94313018-94324708:94325251:94313018-94325317:94325490:-"; transcript_id "AF:1:94313018-94324708:94325251:94313018-94325317:94325490:-:alternative2";
1	hq_isoforms.fasta.no5merge.collapsed.gff	exon	94312918	94313018	.	-	.	gene_id "AF:1:94313018-94324708:94325251:94313018-94325317:94325490:-"; transcript_id "AF:1:94313018-94324708:94325251:94313018-94325317:94325490:-:alternative1";
1	hq_isoforms.fasta.no5merge.collapsed.gff	exon	94325317	94325490	.	-	.	gene_id "AF:1:94313018-94324708:94325251:94313018-94325317:94325490:-"; transcript_id "AF:1:94313018-94324708:94325251:94313018-94325317:94325490:-:alternative1";
1	hq_isoforms.fasta.no5merge.collapsed.gff	exon	94312918	94313018	.	-	.	gene_id "AF:1:94313018-94324708:94325251:94313018-94325317:94325368:-"; transcript_id "AF:1:94313018-94324708:94325251:94313018-94325317:94325368:-:alternative2";
1	hq_isoforms.fasta.no5merge.collapsed.gff	exon	94324708	94325251	.	-	.	gene_id "AF:1:94313018-94324708:94325251:94313018-94325317:94325368:-"; transcript_id "AF:1:94313018-94324708:94325251:94313018-94325317:94325368:-:alternative2";
1	hq_isoforms.fasta.no5merge.collapsed.gff	exon	94312918	94313018	.	-	.	gene_id "AF:1:94313018-94324708:94325251:94313018-94325317:94325368:-"; transcript_id "AF:1:94313018-94324708:94325251:94313018-94325317:94325368:-:alternative1";
1	hq_isoforms.fasta.no5merge.collapsed.gff	exon	94325317	94325368	.	-	.	gene_id "AF:1:94313018-94324708:94325251:94313018-94325317:94325368:-"; transcript_id "AF:1:94313018-94324708:94325251:94313018-94325317:94325368:-:alternative1";
1	hq_isoforms.fasta.no5merge.collapsed.gff	exon	94312918	94313018	.	-	.	gene_id "AF:1:94313018-94324708:94325251:94313018-94325317:94325449:-"; transcript_id "AF:1:94313018-94324708:94325251:94313018-94325317:94325449:-:alternative2";
1	hq_isoforms.fasta.no5merge.collapsed.gff	exon	94324708	94325251	.	-	.	gene_id "AF:1:94313018-94324708:94325251:94313018-94325317:94325449:-"; transcript_id "AF:1:94313018-94324708:94325251:94313018-94325317:94325449:-:alternative2";
1	hq_isoforms.fasta.no5merge.collapsed.gff	exon	94312918	94313018	.	-	.	gene_id "AF:1:94313018-94324708:94325251:94313018-94325317:94325449:-"; transcript_id "AF:1:94313018-94324708:94325251:94313018-94325317:94325449:-:alternative1";
1	hq_isoforms.fasta.no5merge.collapsed.gff	exon	94325317	94325449	.	-	.	gene_id "AF:1:94313018-94324708:94325251:94313018-94325317:94325449:-"; transcript_id "AF:1:94313018-94324708:94325251:94313018-94325317:94325449:-:alternative1";
1	hq_isoforms.fasta.no5merge.collapsed.gff	exon	94312918	94313018	.	-	.	gene_id "AF:1:94313018-94324708:94325251:94313018-94325317:94325475:-"; transcript_id "AF:1:94313018-94324708:94325251:94313018-94325317:94325475:-:alternative2";
1	hq_isoforms.fasta.no5merge.collapsed.gff	exon	94324708	94325251	.	-	.	gene_id "AF:1:94313018-94324708:94325251:94313018-94325317:94325475:-"; transcript_id "AF:1:94313018-94324708:94325251:94313018-94325317:94325475:-:alternative2";
1	hq_isoforms.fasta.no5merge.collapsed.gff	exon	94312918	94313018	.	-	.	gene_id "AF:1:94313018-94324708:94325251:94313018-94325317:94325475:-"; transcript_id "AF:1:94313018-94324708:94325251:94313018-94325317:94325475:-:alternative1";
1	hq_isoforms.fasta.no5merge.collapsed.gff	exon	94325317	94325475	.	-	.	gene_id "AF:1:94313018-94324708:94325251:94313018-94325317:94325475:-"; transcript_id "AF:1:94313018-94324708:94325251:94313018-94325317:94325475:-:alternative1";
1	hq_isoforms.fasta.no5merge.collapsed.gff	exon	94312918	94313018	.	-	.	gene_id "AF:1:94313018-94323090:94323126:94313018-94325317:94325587:-"; transcript_id "AF:1:94313018-94323090:94323126:94313018-94325317:94325587:-:alternative2";
1	hq_isoforms.fasta.no5merge.collapsed.gff	exon	94323090	94323126	.	-	.	gene_id "AF:1:94313018-94323090:94323126:94313018-94325317:94325587:-"; transcript_id "AF:1:94313018-94323090:94323126:94313018-94325317:94325587:-:alternative2";
1	hq_isoforms.fasta.no5merge.collapsed.gff	exon	94312918	94313018	.	-	.	gene_id "AF:1:94313018-94323090:94323126:94313018-94325317:94325587:-"; transcript_id "AF:1:94313018-94323090:94323126:94313018-94325317:94325587:-:alternative1";
1	hq_isoforms.fasta.no5merge.collapsed.gff	exon	94325317	94325587	.	-	.	gene_id "AF:1:94313018-94323090:94323126:94313018-94325317:94325587:-"; transcript_id "AF:1:94313018-94323090:94323126:94313018-94325317:94325587:-:alternative1";
1	hq_isoforms.fasta.no5merge.collapsed.gff	exon	94312918	94313018	.	-	.	gene_id "AF:1:94313018-94323090:94323126:94313018-94324708:94325251:-"; transcript_id "AF:1:94313018-94323090:94323126:94313018-94324708:94325251:-:alternative2";
1	hq_isoforms.fasta.no5merge.collapsed.gff	exon	94323090	94323126	.	-	.	gene_id "AF:1:94313018-94323090:94323126:94313018-94324708:94325251:-"; transcript_id "AF:1:94313018-94323090:94323126:94313018-94324708:94325251:-:alternative2";
1	hq_isoforms.fasta.no5merge.collapsed.gff	exon	94312918	94313018	.	-	.	gene_id "AF:1:94313018-94323090:94323126:94313018-94324708:94325251:-"; transcript_id "AF:1:94313018-94323090:94323126:94313018-94324708:94325251:-:alternative1";
1	hq_isoforms.fasta.no5merge.collapsed.gff	exon	94324708	94325251	.	-	.	gene_id "AF:1:94313018-94323090:94323126:94313018-94324708:94325251:-"; transcript_id "AF:1:94313018-94323090:94323126:94313018-94324708:94325251:-:alternative1";
1	hq_isoforms.fasta.no5merge.collapsed.gff	exon	94312918	94313018	.	-	.	gene_id "AF:1:94313018-94323090:94323126:94313018-94325317:94325467:-"; transcript_id "AF:1:94313018-94323090:94323126:94313018-94325317:94325467:-:alternative2";
1	hq_isoforms.fasta.no5merge.collapsed.gff	exon	94323090	94323126	.	-	.	gene_id "AF:1:94313018-94323090:94323126:94313018-94325317:94325467:-"; transcript_id "AF:1:94313018-94323090:94323126:94313018-94325317:94325467:-:alternative2";
1	hq_isoforms.fasta.no5merge.collapsed.gff	exon	94312918	94313018	.	-	.	gene_id "AF:1:94313018-94323090:94323126:94313018-94325317:94325467:-"; transcript_id "AF:1:94313018-94323090:94323126:94313018-94325317:94325467:-:alternative1";
1	hq_isoforms.fasta.no5merge.collapsed.gff	exon	94325317	94325467	.	-	.	gene_id "AF:1:94313018-94323090:94323126:94313018-94325317:94325467:-"; transcript_id "AF:1:94313018-94323090:94323126:94313018-94325317:94325467:-:alternative1";
1	hq_isoforms.fasta.no5merge.collapsed.gff	exon	94312918	94313018	.	-	.	gene_id "AF:1:94313018-94323090:94323126:94313018-94325317:94325491:-"; transcript_id "AF:1:94313018-94323090:94323126:94313018-94325317:94325491:-:alternative2";
1	hq_isoforms.fasta.no5merge.collapsed.gff	exon	94323090	94323126	.	-	.	gene_id "AF:1:94313018-94323090:94323126:94313018-94325317:94325491:-"; transcript_id "AF:1:94313018-94323090:94323126:94313018-94325317:94325491:-:alternative2";
1	hq_isoforms.fasta.no5merge.collapsed.gff	exon	94312918	94313018	.	-	.	gene_id "AF:1:94313018-94323090:94323126:94313018-94325317:94325491:-"; transcript_id "AF:1:94313018-94323090:94323126:94313018-94325317:94325491:-:alternative1";
1	hq_isoforms.fasta.no5merge.collapsed.gff	exon	94325317	94325491	.	-	.	gene_id "AF:1:94313018-94323090:94323126:94313018-94325317:94325491:-"; transcript_id "AF:1:94313018-94323090:94323126:94313018-94325317:94325491:-:alternative1";
1	hq_isoforms.fasta.no5merge.collapsed.gff	exon	94312918	94313018	.	-	.	gene_id "AF:1:94313018-94323090:94323126:94313018-94325317:94325492:-"; transcript_id "AF:1:94313018-94323090:94323126:94313018-94325317:94325492:-:alternative2";
1	hq_isoforms.fasta.no5merge.collapsed.gff	exon	94323090	94323126	.	-	.	gene_id "AF:1:94313018-94323090:94323126:94313018-94325317:94325492:-"; transcript_id "AF:1:94313018-94323090:94323126:94313018-94325317:94325492:-:alternative2";
1	hq_isoforms.fasta.no5merge.collapsed.gff	exon	94312918	94313018	.	-	.	gene_id "AF:1:94313018-94323090:94323126:94313018-94325317:94325492:-"; transcript_id "AF:1:94313018-94323090:94323126:94313018-94325317:94325492:-:alternative1";
1	hq_isoforms.fasta.no5merge.collapsed.gff	exon	94325317	94325492	.	-	.	gene_id "AF:1:94313018-94323090:94323126:94313018-94325317:94325492:-"; transcript_id "AF:1:94313018-94323090:94323126:94313018-94325317:94325492:-:alternative1";
1	hq_isoforms.fasta.no5merge.collapsed.gff	exon	94312918	94313018	.	-	.	gene_id "AF:1:94313018-94323090:94323126:94313018-94325317:94325427:-"; transcript_id "AF:1:94313018-94323090:94323126:94313018-94325317:94325427:-:alternative2";
1	hq_isoforms.fasta.no5merge.collapsed.gff	exon	94323090	94323126	.	-	.	gene_id "AF:1:94313018-94323090:94323126:94313018-94325317:94325427:-"; transcript_id "AF:1:94313018-94323090:94323126:94313018-94325317:94325427:-:alternative2";
1	hq_isoforms.fasta.no5merge.collapsed.gff	exon	94312918	94313018	.	-	.	gene_id "AF:1:94313018-94323090:94323126:94313018-94325317:94325427:-"; transcript_id "AF:1:94313018-94323090:94323126:94313018-94325317:94325427:-:alternative1";
1	hq_isoforms.fasta.no5merge.collapsed.gff	exon	94325317	94325427	.	-	.	gene_id "AF:1:94313018-94323090:94323126:94313018-94325317:94325427:-"; transcript_id "AF:1:94313018-94323090:94323126:94313018-94325317:94325427:-:alternative1";
1	hq_isoforms.fasta.no5merge.collapsed.gff	exon	94312918	94313018	.	-	.	gene_id "AF:1:94313018-94323090:94323126:94313018-94325317:94325484:-"; transcript_id "AF:1:94313018-94323090:94323126:94313018-94325317:94325484:-:alternative2";
1	hq_isoforms.fasta.no5merge.collapsed.gff	exon	94323090	94323126	.	-	.	gene_id "AF:1:94313018-94323090:94323126:94313018-94325317:94325484:-"; transcript_id "AF:1:94313018-94323090:94323126:94313018-94325317:94325484:-:alternative2";
1	hq_isoforms.fasta.no5merge.collapsed.gff	exon	94312918	94313018	.	-	.	gene_id "AF:1:94313018-94323090:94323126:94313018-94325317:94325484:-"; transcript_id "AF:1:94313018-94323090:94323126:94313018-94325317:94325484:-:alternative1";
1	hq_isoforms.fasta.no5merge.collapsed.gff	exon	94325317	94325484	.	-	.	gene_id "AF:1:94313018-94323090:94323126:94313018-94325317:94325484:-"; transcript_id "AF:1:94313018-94323090:94323126:94313018-94325317:94325484:-:alternative1";
1	hq_isoforms.fasta.no5merge.collapsed.gff	exon	94312918	94313018	.	-	.	gene_id "AF:1:94313018-94323090:94323126:94313018-94325317:94325378:-"; transcript_id "AF:1:94313018-94323090:94323126:94313018-94325317:94325378:-:alternative2";
1	hq_isoforms.fasta.no5merge.collapsed.gff	exon	94323090	94323126	.	-	.	gene_id "AF:1:94313018-94323090:94323126:94313018-94325317:94325378:-"; transcript_id "AF:1:94313018-94323090:94323126:94313018-94325317:94325378:-:alternative2";
1	hq_isoforms.fasta.no5merge.collapsed.gff	exon	94312918	94313018	.	-	.	gene_id "AF:1:94313018-94323090:94323126:94313018-94325317:94325378:-"; transcript_id "AF:1:94313018-94323090:94323126:94313018-94325317:94325378:-:alternative1";
1	hq_isoforms.fasta.no5merge.collapsed.gff	exon	94325317	94325378	.	-	.	gene_id "AF:1:94313018-94323090:94323126:94313018-94325317:94325378:-"; transcript_id "AF:1:94313018-94323090:94323126:94313018-94325317:94325378:-:alternative1";
1	hq_isoforms.fasta.no5merge.collapsed.gff	exon	94312918	94313018	.	-	.	gene_id "AF:1:94313018-94323090:94323126:94313018-94325317:94325426:-"; transcript_id "AF:1:94313018-94323090:94323126:94313018-94325317:94325426:-:alternative2";
1	hq_isoforms.fasta.no5merge.collapsed.gff	exon	94323090	94323126	.	-	.	gene_id "AF:1:94313018-94323090:94323126:94313018-94325317:94325426:-"; transcript_id "AF:1:94313018-94323090:94323126:94313018-94325317:94325426:-:alternative2";
1	hq_isoforms.fasta.no5merge.collapsed.gff	exon	94312918	94313018	.	-	.	gene_id "AF:1:94313018-94323090:94323126:94313018-94325317:94325426:-"; transcript_id "AF:1:94313018-94323090:94323126:94313018-94325317:94325426:-:alternative1";
1	hq_isoforms.fasta.no5merge.collapsed.gff	exon	94325317	94325426	.	-	.	gene_id "AF:1:94313018-94323090:94323126:94313018-94325317:94325426:-"; transcript_id "AF:1:94313018-94323090:94323126:94313018-94325317:94325426:-:alternative1";
1	hq_isoforms.fasta.no5merge.collapsed.gff	exon	94312918	94313018	.	-	.	gene_id "AF:1:94313018-94323090:94323126:94313018-94325317:94325515:-"; transcript_id "AF:1:94313018-94323090:94323126:94313018-94325317:94325515:-:alternative2";
1	hq_isoforms.fasta.no5merge.collapsed.gff	exon	94323090	94323126	.	-	.	gene_id "AF:1:94313018-94323090:94323126:94313018-94325317:94325515:-"; transcript_id "AF:1:94313018-94323090:94323126:94313018-94325317:94325515:-:alternative2";
1	hq_isoforms.fasta.no5merge.collapsed.gff	exon	94312918	94313018	.	-	.	gene_id "AF:1:94313018-94323090:94323126:94313018-94325317:94325515:-"; transcript_id "AF:1:94313018-94323090:94323126:94313018-94325317:94325515:-:alternative1";
1	hq_isoforms.fasta.no5merge.collapsed.gff	exon	94325317	94325515	.	-	.	gene_id "AF:1:94313018-94323090:94323126:94313018-94325317:94325515:-"; transcript_id "AF:1:94313018-94323090:94323126:94313018-94325317:94325515:-:alternative1";
1	hq_isoforms.fasta.no5merge.collapsed.gff	exon	94312918	94313018	.	-	.	gene_id "AF:1:94313018-94323090:94323126:94313018-94325317:94325487:-"; transcript_id "AF:1:94313018-94323090:94323126:94313018-94325317:94325487:-:alternative2";
1	hq_isoforms.fasta.no5merge.collapsed.gff	exon	94323090	94323126	.	-	.	gene_id "AF:1:94313018-94323090:94323126:94313018-94325317:94325487:-"; transcript_id "AF:1:94313018-94323090:94323126:94313018-94325317:94325487:-:alternative2";
1	hq_isoforms.fasta.no5merge.collapsed.gff	exon	94312918	94313018	.	-	.	gene_id "AF:1:94313018-94323090:94323126:94313018-94325317:94325487:-"; transcript_id "AF:1:94313018-94323090:94323126:94313018-94325317:94325487:-:alternative1";
1	hq_isoforms.fasta.no5merge.collapsed.gff	exon	94325317	94325487	.	-	.	gene_id "AF:1:94313018-94323090:94323126:94313018-94325317:94325487:-"; transcript_id "AF:1:94313018-94323090:94323126:94313018-94325317:94325487:-:alternative1";
1	hq_isoforms.fasta.no5merge.collapsed.gff	exon	94312918	94313018	.	-	.	gene_id "AF:1:94313018-94323090:94323126:94313018-94325317:94325516:-"; transcript_id "AF:1:94313018-94323090:94323126:94313018-94325317:94325516:-:alternative2";
1	hq_isoforms.fasta.no5merge.collapsed.gff	exon	94323090	94323126	.	-	.	gene_id "AF:1:94313018-94323090:94323126:94313018-94325317:94325516:-"; transcript_id "AF:1:94313018-94323090:94323126:94313018-94325317:94325516:-:alternative2";
1	hq_isoforms.fasta.no5merge.collapsed.gff	exon	94312918	94313018	.	-	.	gene_id "AF:1:94313018-94323090:94323126:94313018-94325317:94325516:-"; transcript_id "AF:1:94313018-94323090:94323126:94313018-94325317:94325516:-:alternative1";
1	hq_isoforms.fasta.no5merge.collapsed.gff	exon	94325317	94325516	.	-	.	gene_id "AF:1:94313018-94323090:94323126:94313018-94325317:94325516:-"; transcript_id "AF:1:94313018-94323090:94323126:94313018-94325317:94325516:-:alternative1";
1	hq_isoforms.fasta.no5merge.collapsed.gff	exon	94312918	94313018	.	-	.	gene_id "AF:1:94313018-94323090:94323126:94313018-94325317:94325510:-"; transcript_id "AF:1:94313018-94323090:94323126:94313018-94325317:94325510:-:alternative2";
1	hq_isoforms.fasta.no5merge.collapsed.gff	exon	94323090	94323126	.	-	.	gene_id "AF:1:94313018-94323090:94323126:94313018-94325317:94325510:-"; transcript_id "AF:1:94313018-94323090:94323126:94313018-94325317:94325510:-:alternative2";
1	hq_isoforms.fasta.no5merge.collapsed.gff	exon	94312918	94313018	.	-	.	gene_id "AF:1:94313018-94323090:94323126:94313018-94325317:94325510:-"; transcript_id "AF:1:94313018-94323090:94323126:94313018-94325317:94325510:-:alternative1";
1	hq_isoforms.fasta.no5merge.collapsed.gff	exon	94325317	94325510	.	-	.	gene_id "AF:1:94313018-94323090:94323126:94313018-94325317:94325510:-"; transcript_id "AF:1:94313018-94323090:94323126:94313018-94325317:94325510:-:alternative1";
1	hq_isoforms.fasta.no5merge.collapsed.gff	exon	94312918	94313018	.	-	.	gene_id "AF:1:94313018-94323090:94323126:94313018-94325317:94325577:-"; transcript_id "AF:1:94313018-94323090:94323126:94313018-94325317:94325577:-:alternative2";
1	hq_isoforms.fasta.no5merge.collapsed.gff	exon	94323090	94323126	.	-	.	gene_id "AF:1:94313018-94323090:94323126:94313018-94325317:94325577:-"; transcript_id "AF:1:94313018-94323090:94323126:94313018-94325317:94325577:-:alternative2";
1	hq_isoforms.fasta.no5merge.collapsed.gff	exon	94312918	94313018	.	-	.	gene_id "AF:1:94313018-94323090:94323126:94313018-94325317:94325577:-"; transcript_id "AF:1:94313018-94323090:94323126:94313018-94325317:94325577:-:alternative1";
1	hq_isoforms.fasta.no5merge.collapsed.gff	exon	94325317	94325577	.	-	.	gene_id "AF:1:94313018-94323090:94323126:94313018-94325317:94325577:-"; transcript_id "AF:1:94313018-94323090:94323126:94313018-94325317:94325577:-:alternative1";
1	hq_isoforms.fasta.no5merge.collapsed.gff	exon	94312918	94313018	.	-	.	gene_id "AF:1:94313018-94323090:94323126:94313018-94325317:94325490:-"; transcript_id "AF:1:94313018-94323090:94323126:94313018-94325317:94325490:-:alternative2";
1	hq_isoforms.fasta.no5merge.collapsed.gff	exon	94323090	94323126	.	-	.	gene_id "AF:1:94313018-94323090:94323126:94313018-94325317:94325490:-"; transcript_id "AF:1:94313018-94323090:94323126:94313018-94325317:94325490:-:alternative2";
1	hq_isoforms.fasta.no5merge.collapsed.gff	exon	94312918	94313018	.	-	.	gene_id "AF:1:94313018-94323090:94323126:94313018-94325317:94325490:-"; transcript_id "AF:1:94313018-94323090:94323126:94313018-94325317:94325490:-:alternative1";
1	hq_isoforms.fasta.no5merge.collapsed.gff	exon	94325317	94325490	.	-	.	gene_id "AF:1:94313018-94323090:94323126:94313018-94325317:94325490:-"; transcript_id "AF:1:94313018-94323090:94323126:94313018-94325317:94325490:-:alternative1";
1	hq_isoforms.fasta.no5merge.collapsed.gff	exon	94312918	94313018	.	-	.	gene_id "AF:1:94313018-94323090:94323126:94313018-94325317:94325368:-"; transcript_id "AF:1:94313018-94323090:94323126:94313018-94325317:94325368:-:alternative2";
1	hq_isoforms.fasta.no5merge.collapsed.gff	exon	94323090	94323126	.	-	.	gene_id "AF:1:94313018-94323090:94323126:94313018-94325317:94325368:-"; transcript_id "AF:1:94313018-94323090:94323126:94313018-94325317:94325368:-:alternative2";
1	hq_isoforms.fasta.no5merge.collapsed.gff	exon	94312918	94313018	.	-	.	gene_id "AF:1:94313018-94323090:94323126:94313018-94325317:94325368:-"; transcript_id "AF:1:94313018-94323090:94323126:94313018-94325317:94325368:-:alternative1";
1	hq_isoforms.fasta.no5merge.collapsed.gff	exon	94325317	94325368	.	-	.	gene_id "AF:1:94313018-94323090:94323126:94313018-94325317:94325368:-"; transcript_id "AF:1:94313018-94323090:94323126:94313018-94325317:94325368:-:alternative1";
1	hq_isoforms.fasta.no5merge.collapsed.gff	exon	94312918	94313018	.	-	.	gene_id "AF:1:94313018-94323090:94323126:94313018-94325317:94325449:-"; transcript_id "AF:1:94313018-94323090:94323126:94313018-94325317:94325449:-:alternative2";
1	hq_isoforms.fasta.no5merge.collapsed.gff	exon	94323090	94323126	.	-	.	gene_id "AF:1:94313018-94323090:94323126:94313018-94325317:94325449:-"; transcript_id "AF:1:94313018-94323090:94323126:94313018-94325317:94325449:-:alternative2";
1	hq_isoforms.fasta.no5merge.collapsed.gff	exon	94312918	94313018	.	-	.	gene_id "AF:1:94313018-94323090:94323126:94313018-94325317:94325449:-"; transcript_id "AF:1:94313018-94323090:94323126:94313018-94325317:94325449:-:alternative1";
1	hq_isoforms.fasta.no5merge.collapsed.gff	exon	94325317	94325449	.	-	.	gene_id "AF:1:94313018-94323090:94323126:94313018-94325317:94325449:-"; transcript_id "AF:1:94313018-94323090:94323126:94313018-94325317:94325449:-:alternative1";
1	hq_isoforms.fasta.no5merge.collapsed.gff	exon	94312918	94313018	.	-	.	gene_id "AF:1:94313018-94323090:94323126:94313018-94325317:94325475:-"; transcript_id "AF:1:94313018-94323090:94323126:94313018-94325317:94325475:-:alternative2";
1	hq_isoforms.fasta.no5merge.collapsed.gff	exon	94323090	94323126	.	-	.	gene_id "AF:1:94313018-94323090:94323126:94313018-94325317:94325475:-"; transcript_id "AF:1:94313018-94323090:94323126:94313018-94325317:94325475:-:alternative2";
1	hq_isoforms.fasta.no5merge.collapsed.gff	exon	94312918	94313018	.	-	.	gene_id "AF:1:94313018-94323090:94323126:94313018-94325317:94325475:-"; transcript_id "AF:1:94313018-94323090:94323126:94313018-94325317:94325475:-:alternative1";
1	hq_isoforms.fasta.no5merge.collapsed.gff	exon	94325317	94325475	.	-	.	gene_id "AF:1:94313018-94323090:94323126:94313018-94325317:94325475:-"; transcript_id "AF:1:94313018-94323090:94323126:94313018-94325317:94325475:-:alternative1";
1	hq_isoforms.fasta.no5merge.collapsed.gff	exon	94312918	94313018	.	-	.	gene_id "AF:1:94313018-94319092:94319214:94313018-94325317:94325587:-"; transcript_id "AF:1:94313018-94319092:94319214:94313018-94325317:94325587:-:alternative2";
1	hq_isoforms.fasta.no5merge.collapsed.gff	exon	94319092	94319214	.	-	.	gene_id "AF:1:94313018-94319092:94319214:94313018-94325317:94325587:-"; transcript_id "AF:1:94313018-94319092:94319214:94313018-94325317:94325587:-:alternative2";
1	hq_isoforms.fasta.no5merge.collapsed.gff	exon	94312918	94313018	.	-	.	gene_id "AF:1:94313018-94319092:94319214:94313018-94325317:94325587:-"; transcript_id "AF:1:94313018-94319092:94319214:94313018-94325317:94325587:-:alternative1";
1	hq_isoforms.fasta.no5merge.collapsed.gff	exon	94325317	94325587	.	-	.	gene_id "AF:1:94313018-94319092:94319214:94313018-94325317:94325587:-"; transcript_id "AF:1:94313018-94319092:94319214:94313018-94325317:94325587:-:alternative1";
1	hq_isoforms.fasta.no5merge.collapsed.gff	exon	94312918	94313018	.	-	.	gene_id "AF:1:94313018-94319092:94319214:94313018-94324708:94325251:-"; transcript_id "AF:1:94313018-94319092:94319214:94313018-94324708:94325251:-:alternative2";
1	hq_isoforms.fasta.no5merge.collapsed.gff	exon	94319092	94319214	.	-	.	gene_id "AF:1:94313018-94319092:94319214:94313018-94324708:94325251:-"; transcript_id "AF:1:94313018-94319092:94319214:94313018-94324708:94325251:-:alternative2";
1	hq_isoforms.fasta.no5merge.collapsed.gff	exon	94312918	94313018	.	-	.	gene_id "AF:1:94313018-94319092:94319214:94313018-94324708:94325251:-"; transcript_id "AF:1:94313018-94319092:94319214:94313018-94324708:94325251:-:alternative1";
1	hq_isoforms.fasta.no5merge.collapsed.gff	exon	94324708	94325251	.	-	.	gene_id "AF:1:94313018-94319092:94319214:94313018-94324708:94325251:-"; transcript_id "AF:1:94313018-94319092:94319214:94313018-94324708:94325251:-:alternative1";
1	hq_isoforms.fasta.no5merge.collapsed.gff	exon	94312918	94313018	.	-	.	gene_id "AF:1:94313018-94319092:94319214:94313018-94325317:94325467:-"; transcript_id "AF:1:94313018-94319092:94319214:94313018-94325317:94325467:-:alternative2";
1	hq_isoforms.fasta.no5merge.collapsed.gff	exon	94319092	94319214	.	-	.	gene_id "AF:1:94313018-94319092:94319214:94313018-94325317:94325467:-"; transcript_id "AF:1:94313018-94319092:94319214:94313018-94325317:94325467:-:alternative2";
1	hq_isoforms.fasta.no5merge.collapsed.gff	exon	94312918	94313018	.	-	.	gene_id "AF:1:94313018-94319092:94319214:94313018-94325317:94325467:-"; transcript_id "AF:1:94313018-94319092:94319214:94313018-94325317:94325467:-:alternative1";
1	hq_isoforms.fasta.no5merge.collapsed.gff	exon	94325317	94325467	.	-	.	gene_id "AF:1:94313018-94319092:94319214:94313018-94325317:94325467:-"; transcript_id "AF:1:94313018-94319092:94319214:94313018-94325317:94325467:-:alternative1";
1	hq_isoforms.fasta.no5merge.collapsed.gff	exon	94312918	94313018	.	-	.	gene_id "AF:1:94313018-94319092:94319214:94313018-94325317:94325491:-"; transcript_id "AF:1:94313018-94319092:94319214:94313018-94325317:94325491:-:alternative2";
1	hq_isoforms.fasta.no5merge.collapsed.gff	exon	94319092	94319214	.	-	.	gene_id "AF:1:94313018-94319092:94319214:94313018-94325317:94325491:-"; transcript_id "AF:1:94313018-94319092:94319214:94313018-94325317:94325491:-:alternative2";
1	hq_isoforms.fasta.no5merge.collapsed.gff	exon	94312918	94313018	.	-	.	gene_id "AF:1:94313018-94319092:94319214:94313018-94325317:94325491:-"; transcript_id "AF:1:94313018-94319092:94319214:94313018-94325317:94325491:-:alternative1";
1	hq_isoforms.fasta.no5merge.collapsed.gff	exon	94325317	94325491	.	-	.	gene_id "AF:1:94313018-94319092:94319214:94313018-94325317:94325491:-"; transcript_id "AF:1:94313018-94319092:94319214:94313018-94325317:94325491:-:alternative1";
1	hq_isoforms.fasta.no5merge.collapsed.gff	exon	94312918	94313018	.	-	.	gene_id "AF:1:94313018-94319092:94319214:94313018-94325317:94325492:-"; transcript_id "AF:1:94313018-94319092:94319214:94313018-94325317:94325492:-:alternative2";
1	hq_isoforms.fasta.no5merge.collapsed.gff	exon	94319092	94319214	.	-	.	gene_id "AF:1:94313018-94319092:94319214:94313018-94325317:94325492:-"; transcript_id "AF:1:94313018-94319092:94319214:94313018-94325317:94325492:-:alternative2";
1	hq_isoforms.fasta.no5merge.collapsed.gff	exon	94312918	94313018	.	-	.	gene_id "AF:1:94313018-94319092:94319214:94313018-94325317:94325492:-"; transcript_id "AF:1:94313018-94319092:94319214:94313018-94325317:94325492:-:alternative1";
1	hq_isoforms.fasta.no5merge.collapsed.gff	exon	94325317	94325492	.	-	.	gene_id "AF:1:94313018-94319092:94319214:94313018-94325317:94325492:-"; transcript_id "AF:1:94313018-94319092:94319214:94313018-94325317:94325492:-:alternative1";
1	hq_isoforms.fasta.no5merge.collapsed.gff	exon	94312918	94313018	.	-	.	gene_id "AF:1:94313018-94319092:94319214:94313018-94325317:94325427:-"; transcript_id "AF:1:94313018-94319092:94319214:94313018-94325317:94325427:-:alternative2";
1	hq_isoforms.fasta.no5merge.collapsed.gff	exon	94319092	94319214	.	-	.	gene_id "AF:1:94313018-94319092:94319214:94313018-94325317:94325427:-"; transcript_id "AF:1:94313018-94319092:94319214:94313018-94325317:94325427:-:alternative2";
1	hq_isoforms.fasta.no5merge.collapsed.gff	exon	94312918	94313018	.	-	.	gene_id "AF:1:94313018-94319092:94319214:94313018-94325317:94325427:-"; transcript_id "AF:1:94313018-94319092:94319214:94313018-94325317:94325427:-:alternative1";
1	hq_isoforms.fasta.no5merge.collapsed.gff	exon	94325317	94325427	.	-	.	gene_id "AF:1:94313018-94319092:94319214:94313018-94325317:94325427:-"; transcript_id "AF:1:94313018-94319092:94319214:94313018-94325317:94325427:-:alternative1";
1	hq_isoforms.fasta.no5merge.collapsed.gff	exon	94312918	94313018	.	-	.	gene_id "AF:1:94313018-94319092:94319214:94313018-94325317:94325484:-"; transcript_id "AF:1:94313018-94319092:94319214:94313018-94325317:94325484:-:alternative2";
1	hq_isoforms.fasta.no5merge.collapsed.gff	exon	94319092	94319214	.	-	.	gene_id "AF:1:94313018-94319092:94319214:94313018-94325317:94325484:-"; transcript_id "AF:1:94313018-94319092:94319214:94313018-94325317:94325484:-:alternative2";
1	hq_isoforms.fasta.no5merge.collapsed.gff	exon	94312918	94313018	.	-	.	gene_id "AF:1:94313018-94319092:94319214:94313018-94325317:94325484:-"; transcript_id "AF:1:94313018-94319092:94319214:94313018-94325317:94325484:-:alternative1";
1	hq_isoforms.fasta.no5merge.collapsed.gff	exon	94325317	94325484	.	-	.	gene_id "AF:1:94313018-94319092:94319214:94313018-94325317:94325484:-"; transcript_id "AF:1:94313018-94319092:94319214:94313018-94325317:94325484:-:alternative1";
1	hq_isoforms.fasta.no5merge.collapsed.gff	exon	94312918	94313018	.	-	.	gene_id "AF:1:94313018-94319092:94319214:94313018-94325317:94325378:-"; transcript_id "AF:1:94313018-94319092:94319214:94313018-94325317:94325378:-:alternative2";
1	hq_isoforms.fasta.no5merge.collapsed.gff	exon	94319092	94319214	.	-	.	gene_id "AF:1:94313018-94319092:94319214:94313018-94325317:94325378:-"; transcript_id "AF:1:94313018-94319092:94319214:94313018-94325317:94325378:-:alternative2";
1	hq_isoforms.fasta.no5merge.collapsed.gff	exon	94312918	94313018	.	-	.	gene_id "AF:1:94313018-94319092:94319214:94313018-94325317:94325378:-"; transcript_id "AF:1:94313018-94319092:94319214:94313018-94325317:94325378:-:alternative1";
1	hq_isoforms.fasta.no5merge.collapsed.gff	exon	94325317	94325378	.	-	.	gene_id "AF:1:94313018-94319092:94319214:94313018-94325317:94325378:-"; transcript_id "AF:1:94313018-94319092:94319214:94313018-94325317:94325378:-:alternative1";
1	hq_isoforms.fasta.no5merge.collapsed.gff	exon	94312918	94313018	.	-	.	gene_id "AF:1:94313018-94319092:94319214:94313018-94325317:94325426:-"; transcript_id "AF:1:94313018-94319092:94319214:94313018-94325317:94325426:-:alternative2";
1	hq_isoforms.fasta.no5merge.collapsed.gff	exon	94319092	94319214	.	-	.	gene_id "AF:1:94313018-94319092:94319214:94313018-94325317:94325426:-"; transcript_id "AF:1:94313018-94319092:94319214:94313018-94325317:94325426:-:alternative2";
1	hq_isoforms.fasta.no5merge.collapsed.gff	exon	94312918	94313018	.	-	.	gene_id "AF:1:94313018-94319092:94319214:94313018-94325317:94325426:-"; transcript_id "AF:1:94313018-94319092:94319214:94313018-94325317:94325426:-:alternative1";
1	hq_isoforms.fasta.no5merge.collapsed.gff	exon	94325317	94325426	.	-	.	gene_id "AF:1:94313018-94319092:94319214:94313018-94325317:94325426:-"; transcript_id "AF:1:94313018-94319092:94319214:94313018-94325317:94325426:-:alternative1";
1	hq_isoforms.fasta.no5merge.collapsed.gff	exon	94312918	94313018	.	-	.	gene_id "AF:1:94313018-94319092:94319214:94313018-94325317:94325515:-"; transcript_id "AF:1:94313018-94319092:94319214:94313018-94325317:94325515:-:alternative2";
1	hq_isoforms.fasta.no5merge.collapsed.gff	exon	94319092	94319214	.	-	.	gene_id "AF:1:94313018-94319092:94319214:94313018-94325317:94325515:-"; transcript_id "AF:1:94313018-94319092:94319214:94313018-94325317:94325515:-:alternative2";
1	hq_isoforms.fasta.no5merge.collapsed.gff	exon	94312918	94313018	.	-	.	gene_id "AF:1:94313018-94319092:94319214:94313018-94325317:94325515:-"; transcript_id "AF:1:94313018-94319092:94319214:94313018-94325317:94325515:-:alternative1";
1	hq_isoforms.fasta.no5merge.collapsed.gff	exon	94325317	94325515	.	-	.	gene_id "AF:1:94313018-94319092:94319214:94313018-94325317:94325515:-"; transcript_id "AF:1:94313018-94319092:94319214:94313018-94325317:94325515:-:alternative1";
1	hq_isoforms.fasta.no5merge.collapsed.gff	exon	94312918	94313018	.	-	.	gene_id "AF:1:94313018-94319092:94319214:94313018-94325317:94325487:-"; transcript_id "AF:1:94313018-94319092:94319214:94313018-94325317:94325487:-:alternative2";
1	hq_isoforms.fasta.no5merge.collapsed.gff	exon	94319092	94319214	.	-	.	gene_id "AF:1:94313018-94319092:94319214:94313018-94325317:94325487:-"; transcript_id "AF:1:94313018-94319092:94319214:94313018-94325317:94325487:-:alternative2";
1	hq_isoforms.fasta.no5merge.collapsed.gff	exon	94312918	94313018	.	-	.	gene_id "AF:1:94313018-94319092:94319214:94313018-94325317:94325487:-"; transcript_id "AF:1:94313018-94319092:94319214:94313018-94325317:94325487:-:alternative1";
1	hq_isoforms.fasta.no5merge.collapsed.gff	exon	94325317	94325487	.	-	.	gene_id "AF:1:94313018-94319092:94319214:94313018-94325317:94325487:-"; transcript_id "AF:1:94313018-94319092:94319214:94313018-94325317:94325487:-:alternative1";
1	hq_isoforms.fasta.no5merge.collapsed.gff	exon	94312918	94313018	.	-	.	gene_id "AF:1:94313018-94319092:94319214:94313018-94325317:94325516:-"; transcript_id "AF:1:94313018-94319092:94319214:94313018-94325317:94325516:-:alternative2";
1	hq_isoforms.fasta.no5merge.collapsed.gff	exon	94319092	94319214	.	-	.	gene_id "AF:1:94313018-94319092:94319214:94313018-94325317:94325516:-"; transcript_id "AF:1:94313018-94319092:94319214:94313018-94325317:94325516:-:alternative2";
1	hq_isoforms.fasta.no5merge.collapsed.gff	exon	94312918	94313018	.	-	.	gene_id "AF:1:94313018-94319092:94319214:94313018-94325317:94325516:-"; transcript_id "AF:1:94313018-94319092:94319214:94313018-94325317:94325516:-:alternative1";
1	hq_isoforms.fasta.no5merge.collapsed.gff	exon	94325317	94325516	.	-	.	gene_id "AF:1:94313018-94319092:94319214:94313018-94325317:94325516:-"; transcript_id "AF:1:94313018-94319092:94319214:94313018-94325317:94325516:-:alternative1";
1	hq_isoforms.fasta.no5merge.collapsed.gff	exon	94312918	94313018	.	-	.	gene_id "AF:1:94313018-94319092:94319214:94313018-94323090:94323126:-"; transcript_id "AF:1:94313018-94319092:94319214:94313018-94323090:94323126:-:alternative2";
1	hq_isoforms.fasta.no5merge.collapsed.gff	exon	94319092	94319214	.	-	.	gene_id "AF:1:94313018-94319092:94319214:94313018-94323090:94323126:-"; transcript_id "AF:1:94313018-94319092:94319214:94313018-94323090:94323126:-:alternative2";
1	hq_isoforms.fasta.no5merge.collapsed.gff	exon	94312918	94313018	.	-	.	gene_id "AF:1:94313018-94319092:94319214:94313018-94323090:94323126:-"; transcript_id "AF:1:94313018-94319092:94319214:94313018-94323090:94323126:-:alternative1";
1	hq_isoforms.fasta.no5merge.collapsed.gff	exon	94323090	94323126	.	-	.	gene_id "AF:1:94313018-94319092:94319214:94313018-94323090:94323126:-"; transcript_id "AF:1:94313018-94319092:94319214:94313018-94323090:94323126:-:alternative1";
1	hq_isoforms.fasta.no5merge.collapsed.gff	exon	94312918	94313018	.	-	.	gene_id "AF:1:94313018-94319092:94319214:94313018-94325317:94325510:-"; transcript_id "AF:1:94313018-94319092:94319214:94313018-94325317:94325510:-:alternative2";
1	hq_isoforms.fasta.no5merge.collapsed.gff	exon	94319092	94319214	.	-	.	gene_id "AF:1:94313018-94319092:94319214:94313018-94325317:94325510:-"; transcript_id "AF:1:94313018-94319092:94319214:94313018-94325317:94325510:-:alternative2";
1	hq_isoforms.fasta.no5merge.collapsed.gff	exon	94312918	94313018	.	-	.	gene_id "AF:1:94313018-94319092:94319214:94313018-94325317:94325510:-"; transcript_id "AF:1:94313018-94319092:94319214:94313018-94325317:94325510:-:alternative1";
1	hq_isoforms.fasta.no5merge.collapsed.gff	exon	94325317	94325510	.	-	.	gene_id "AF:1:94313018-94319092:94319214:94313018-94325317:94325510:-"; transcript_id "AF:1:94313018-94319092:94319214:94313018-94325317:94325510:-:alternative1";
1	hq_isoforms.fasta.no5merge.collapsed.gff	exon	94312918	94313018	.	-	.	gene_id "AF:1:94313018-94319092:94319214:94313018-94325317:94325577:-"; transcript_id "AF:1:94313018-94319092:94319214:94313018-94325317:94325577:-:alternative2";
1	hq_isoforms.fasta.no5merge.collapsed.gff	exon	94319092	94319214	.	-	.	gene_id "AF:1:94313018-94319092:94319214:94313018-94325317:94325577:-"; transcript_id "AF:1:94313018-94319092:94319214:94313018-94325317:94325577:-:alternative2";
1	hq_isoforms.fasta.no5merge.collapsed.gff	exon	94312918	94313018	.	-	.	gene_id "AF:1:94313018-94319092:94319214:94313018-94325317:94325577:-"; transcript_id "AF:1:94313018-94319092:94319214:94313018-94325317:94325577:-:alternative1";
1	hq_isoforms.fasta.no5merge.collapsed.gff	exon	94325317	94325577	.	-	.	gene_id "AF:1:94313018-94319092:94319214:94313018-94325317:94325577:-"; transcript_id "AF:1:94313018-94319092:94319214:94313018-94325317:94325577:-:alternative1";
1	hq_isoforms.fasta.no5merge.collapsed.gff	exon	94312918	94313018	.	-	.	gene_id "AF:1:94313018-94319092:94319214:94313018-94325317:94325490:-"; transcript_id "AF:1:94313018-94319092:94319214:94313018-94325317:94325490:-:alternative2";
1	hq_isoforms.fasta.no5merge.collapsed.gff	exon	94319092	94319214	.	-	.	gene_id "AF:1:94313018-94319092:94319214:94313018-94325317:94325490:-"; transcript_id "AF:1:94313018-94319092:94319214:94313018-94325317:94325490:-:alternative2";
1	hq_isoforms.fasta.no5merge.collapsed.gff	exon	94312918	94313018	.	-	.	gene_id "AF:1:94313018-94319092:94319214:94313018-94325317:94325490:-"; transcript_id "AF:1:94313018-94319092:94319214:94313018-94325317:94325490:-:alternative1";
1	hq_isoforms.fasta.no5merge.collapsed.gff	exon	94325317	94325490	.	-	.	gene_id "AF:1:94313018-94319092:94319214:94313018-94325317:94325490:-"; transcript_id "AF:1:94313018-94319092:94319214:94313018-94325317:94325490:-:alternative1";
1	hq_isoforms.fasta.no5merge.collapsed.gff	exon	94312918	94313018	.	-	.	gene_id "AF:1:94313018-94319092:94319214:94313018-94325317:94325368:-"; transcript_id "AF:1:94313018-94319092:94319214:94313018-94325317:94325368:-:alternative2";
1	hq_isoforms.fasta.no5merge.collapsed.gff	exon	94319092	94319214	.	-	.	gene_id "AF:1:94313018-94319092:94319214:94313018-94325317:94325368:-"; transcript_id "AF:1:94313018-94319092:94319214:94313018-94325317:94325368:-:alternative2";
1	hq_isoforms.fasta.no5merge.collapsed.gff	exon	94312918	94313018	.	-	.	gene_id "AF:1:94313018-94319092:94319214:94313018-94325317:94325368:-"; transcript_id "AF:1:94313018-94319092:94319214:94313018-94325317:94325368:-:alternative1";
1	hq_isoforms.fasta.no5merge.collapsed.gff	exon	94325317	94325368	.	-	.	gene_id "AF:1:94313018-94319092:94319214:94313018-94325317:94325368:-"; transcript_id "AF:1:94313018-94319092:94319214:94313018-94325317:94325368:-:alternative1";
1	hq_isoforms.fasta.no5merge.collapsed.gff	exon	94312918	94313018	.	-	.	gene_id "AF:1:94313018-94319092:94319214:94313018-94325317:94325449:-"; transcript_id "AF:1:94313018-94319092:94319214:94313018-94325317:94325449:-:alternative2";
1	hq_isoforms.fasta.no5merge.collapsed.gff	exon	94319092	94319214	.	-	.	gene_id "AF:1:94313018-94319092:94319214:94313018-94325317:94325449:-"; transcript_id "AF:1:94313018-94319092:94319214:94313018-94325317:94325449:-:alternative2";
1	hq_isoforms.fasta.no5merge.collapsed.gff	exon	94312918	94313018	.	-	.	gene_id "AF:1:94313018-94319092:94319214:94313018-94325317:94325449:-"; transcript_id "AF:1:94313018-94319092:94319214:94313018-94325317:94325449:-:alternative1";
1	hq_isoforms.fasta.no5merge.collapsed.gff	exon	94325317	94325449	.	-	.	gene_id "AF:1:94313018-94319092:94319214:94313018-94325317:94325449:-"; transcript_id "AF:1:94313018-94319092:94319214:94313018-94325317:94325449:-:alternative1";
1	hq_isoforms.fasta.no5merge.collapsed.gff	exon	94312918	94313018	.	-	.	gene_id "AF:1:94313018-94319092:94319214:94313018-94325317:94325475:-"; transcript_id "AF:1:94313018-94319092:94319214:94313018-94325317:94325475:-:alternative2";
1	hq_isoforms.fasta.no5merge.collapsed.gff	exon	94319092	94319214	.	-	.	gene_id "AF:1:94313018-94319092:94319214:94313018-94325317:94325475:-"; transcript_id "AF:1:94313018-94319092:94319214:94313018-94325317:94325475:-:alternative2";
1	hq_isoforms.fasta.no5merge.collapsed.gff	exon	94312918	94313018	.	-	.	gene_id "AF:1:94313018-94319092:94319214:94313018-94325317:94325475:-"; transcript_id "AF:1:94313018-94319092:94319214:94313018-94325317:94325475:-:alternative1";
1	hq_isoforms.fasta.no5merge.collapsed.gff	exon	94325317	94325475	.	-	.	gene_id "AF:1:94313018-94319092:94319214:94313018-94325317:94325475:-"; transcript_id "AF:1:94313018-94319092:94319214:94313018-94325317:94325475:-:alternative1";
1	hq_isoforms.fasta.no5merge.collapsed.gff	exon	95100631	95100731	.	-	.	gene_id "AF:1:95100731-95101724:95103674:95100731-95106574:95107211:-"; transcript_id "AF:1:95100731-95101724:95103674:95100731-95106574:95107211:-:alternative2";
1	hq_isoforms.fasta.no5merge.collapsed.gff	exon	95101724	95103674	.	-	.	gene_id "AF:1:95100731-95101724:95103674:95100731-95106574:95107211:-"; transcript_id "AF:1:95100731-95101724:95103674:95100731-95106574:95107211:-:alternative2";
1	hq_isoforms.fasta.no5merge.collapsed.gff	exon	95100631	95100731	.	-	.	gene_id "AF:1:95100731-95101724:95103674:95100731-95106574:95107211:-"; transcript_id "AF:1:95100731-95101724:95103674:95100731-95106574:95107211:-:alternative1";
1	hq_isoforms.fasta.no5merge.collapsed.gff	exon	95106574	95107211	.	-	.	gene_id "AF:1:95100731-95101724:95103674:95100731-95106574:95107211:-"; transcript_id "AF:1:95100731-95101724:95103674:95100731-95106574:95107211:-:alternative1";
1	hq_isoforms.fasta.no5merge.collapsed.gff	exon	101335899	101335999	.	-	.	gene_id "AF:1:101335999-101355177:101355225:101335999-101363452:101363953:-"; transcript_id "AF:1:101335999-101355177:101355225:101335999-101363452:101363953:-:alternative2";
1	hq_isoforms.fasta.no5merge.collapsed.gff	exon	101355177	101355225	.	-	.	gene_id "AF:1:101335999-101355177:101355225:101335999-101363452:101363953:-"; transcript_id "AF:1:101335999-101355177:101355225:101335999-101363452:101363953:-:alternative2";
1	hq_isoforms.fasta.no5merge.collapsed.gff	exon	101335899	101335999	.	-	.	gene_id "AF:1:101335999-101355177:101355225:101335999-101363452:101363953:-"; transcript_id "AF:1:101335999-101355177:101355225:101335999-101363452:101363953:-:alternative1";
1	hq_isoforms.fasta.no5merge.collapsed.gff	exon	101363452	101363953	.	-	.	gene_id "AF:1:101335999-101355177:101355225:101335999-101363452:101363953:-"; transcript_id "AF:1:101335999-101355177:101355225:101335999-101363452:101363953:-:alternative1";
1	hq_isoforms.fasta.no5merge.collapsed.gff	exon	101400781	101400881	.	-	.	gene_id "AF:1:101400881-101406232:101406652:101400881-101406793:101406935:-"; transcript_id "AF:1:101400881-101406232:101406652:101400881-101406793:101406935:-:alternative2";
1	hq_isoforms.fasta.no5merge.collapsed.gff	exon	101406232	101406652	.	-	.	gene_id "AF:1:101400881-101406232:101406652:101400881-101406793:101406935:-"; transcript_id "AF:1:101400881-101406232:101406652:101400881-101406793:101406935:-:alternative2";
1	hq_isoforms.fasta.no5merge.collapsed.gff	exon	101400781	101400881	.	-	.	gene_id "AF:1:101400881-101406232:101406652:101400881-101406793:101406935:-"; transcript_id "AF:1:101400881-101406232:101406652:101400881-101406793:101406935:-:alternative1";
1	hq_isoforms.fasta.no5merge.collapsed.gff	exon	101406793	101406935	.	-	.	gene_id "AF:1:101400881-101406232:101406652:101400881-101406793:101406935:-"; transcript_id "AF:1:101400881-101406232:101406652:101400881-101406793:101406935:-:alternative1";
1	hq_isoforms.fasta.no5merge.collapsed.gff	exon	107226502	107226602	.	-	.	gene_id "AF:1:107226602-107226675:107228053:107226602-107228112:107228205:-"; transcript_id "AF:1:107226602-107226675:107228053:107226602-107228112:107228205:-:alternative2";
1	hq_isoforms.fasta.no5merge.collapsed.gff	exon	107226675	107228053	.	-	.	gene_id "AF:1:107226602-107226675:107228053:107226602-107228112:107228205:-"; transcript_id "AF:1:107226602-107226675:107228053:107226602-107228112:107228205:-:alternative2";
1	hq_isoforms.fasta.no5merge.collapsed.gff	exon	107226502	107226602	.	-	.	gene_id "AF:1:107226602-107226675:107228053:107226602-107228112:107228205:-"; transcript_id "AF:1:107226602-107226675:107228053:107226602-107228112:107228205:-:alternative1";
1	hq_isoforms.fasta.no5merge.collapsed.gff	exon	107228112	107228205	.	-	.	gene_id "AF:1:107226602-107226675:107228053:107226602-107228112:107228205:-"; transcript_id "AF:1:107226602-107226675:107228053:107226602-107228112:107228205:-:alternative1";
1	hq_isoforms.fasta.no5merge.collapsed.gff	exon	107226502	107226602	.	-	.	gene_id "AF:1:107226602-107226675:107228053:107226602-107228112:107228238:-"; transcript_id "AF:1:107226602-107226675:107228053:107226602-107228112:107228238:-:alternative2";
1	hq_isoforms.fasta.no5merge.collapsed.gff	exon	107226675	107228053	.	-	.	gene_id "AF:1:107226602-107226675:107228053:107226602-107228112:107228238:-"; transcript_id "AF:1:107226602-107226675:107228053:107226602-107228112:107228238:-:alternative2";
1	hq_isoforms.fasta.no5merge.collapsed.gff	exon	107226502	107226602	.	-	.	gene_id "AF:1:107226602-107226675:107228053:107226602-107228112:107228238:-"; transcript_id "AF:1:107226602-107226675:107228053:107226602-107228112:107228238:-:alternative1";
1	hq_isoforms.fasta.no5merge.collapsed.gff	exon	107228112	107228238	.	-	.	gene_id "AF:1:107226602-107226675:107228053:107226602-107228112:107228238:-"; transcript_id "AF:1:107226602-107226675:107228053:107226602-107228112:107228238:-:alternative1";
1	hq_isoforms.fasta.no5merge.collapsed.gff	exon	107226502	107226602	.	-	.	gene_id "AF:1:107226602-107226675:107228053:107226602-107228112:107228251:-"; transcript_id "AF:1:107226602-107226675:107228053:107226602-107228112:107228251:-:alternative2";
1	hq_isoforms.fasta.no5merge.collapsed.gff	exon	107226675	107228053	.	-	.	gene_id "AF:1:107226602-107226675:107228053:107226602-107228112:107228251:-"; transcript_id "AF:1:107226602-107226675:107228053:107226602-107228112:107228251:-:alternative2";
1	hq_isoforms.fasta.no5merge.collapsed.gff	exon	107226502	107226602	.	-	.	gene_id "AF:1:107226602-107226675:107228053:107226602-107228112:107228251:-"; transcript_id "AF:1:107226602-107226675:107228053:107226602-107228112:107228251:-:alternative1";
1	hq_isoforms.fasta.no5merge.collapsed.gff	exon	107228112	107228251	.	-	.	gene_id "AF:1:107226602-107226675:107228053:107226602-107228112:107228251:-"; transcript_id "AF:1:107226602-107226675:107228053:107226602-107228112:107228251:-:alternative1";
1	hq_isoforms.fasta.no5merge.collapsed.gff	exon	107226502	107226602	.	-	.	gene_id "AF:1:107226602-107226675:107228053:107226602-107228112:107228260:-"; transcript_id "AF:1:107226602-107226675:107228053:107226602-107228112:107228260:-:alternative2";
1	hq_isoforms.fasta.no5merge.collapsed.gff	exon	107226675	107228053	.	-	.	gene_id "AF:1:107226602-107226675:107228053:107226602-107228112:107228260:-"; transcript_id "AF:1:107226602-107226675:107228053:107226602-107228112:107228260:-:alternative2";
1	hq_isoforms.fasta.no5merge.collapsed.gff	exon	107226502	107226602	.	-	.	gene_id "AF:1:107226602-107226675:107228053:107226602-107228112:107228260:-"; transcript_id "AF:1:107226602-107226675:107228053:107226602-107228112:107228260:-:alternative1";
1	hq_isoforms.fasta.no5merge.collapsed.gff	exon	107228112	107228260	.	-	.	gene_id "AF:1:107226602-107226675:107228053:107226602-107228112:107228260:-"; transcript_id "AF:1:107226602-107226675:107228053:107226602-107228112:107228260:-:alternative1";
1	hq_isoforms.fasta.no5merge.collapsed.gff	exon	109210490	109210590	.	-	.	gene_id "AF:1:109210590-109212745:109212931:109210590-109243044:109243289:-"; transcript_id "AF:1:109210590-109212745:109212931:109210590-109243044:109243289:-:alternative2";
1	hq_isoforms.fasta.no5merge.collapsed.gff	exon	109212745	109212931	.	-	.	gene_id "AF:1:109210590-109212745:109212931:109210590-109243044:109243289:-"; transcript_id "AF:1:109210590-109212745:109212931:109210590-109243044:109243289:-:alternative2";
1	hq_isoforms.fasta.no5merge.collapsed.gff	exon	109210490	109210590	.	-	.	gene_id "AF:1:109210590-109212745:109212931:109210590-109243044:109243289:-"; transcript_id "AF:1:109210590-109212745:109212931:109210590-109243044:109243289:-:alternative1";
1	hq_isoforms.fasta.no5merge.collapsed.gff	exon	109243044	109243289	.	-	.	gene_id "AF:1:109210590-109212745:109212931:109210590-109243044:109243289:-"; transcript_id "AF:1:109210590-109212745:109212931:109210590-109243044:109243289:-:alternative1";
1	hq_isoforms.fasta.no5merge.collapsed.gff	exon	109210490	109210590	.	-	.	gene_id "AF:1:109210590-109212745:109212931:109210590-109243044:109243325:-"; transcript_id "AF:1:109210590-109212745:109212931:109210590-109243044:109243325:-:alternative2";
1	hq_isoforms.fasta.no5merge.collapsed.gff	exon	109212745	109212931	.	-	.	gene_id "AF:1:109210590-109212745:109212931:109210590-109243044:109243325:-"; transcript_id "AF:1:109210590-109212745:109212931:109210590-109243044:109243325:-:alternative2";
1	hq_isoforms.fasta.no5merge.collapsed.gff	exon	109210490	109210590	.	-	.	gene_id "AF:1:109210590-109212745:109212931:109210590-109243044:109243325:-"; transcript_id "AF:1:109210590-109212745:109212931:109210590-109243044:109243325:-:alternative1";
1	hq_isoforms.fasta.no5merge.collapsed.gff	exon	109243044	109243325	.	-	.	gene_id "AF:1:109210590-109212745:109212931:109210590-109243044:109243325:-"; transcript_id "AF:1:109210590-109212745:109212931:109210590-109243044:109243325:-:alternative1";
1	hq_isoforms.fasta.no5merge.collapsed.gff	exon	109210490	109210590	.	-	.	gene_id "AF:1:109210590-109212745:109212931:109210590-109243290:109243441:-"; transcript_id "AF:1:109210590-109212745:109212931:109210590-109243290:109243441:-:alternative2";
1	hq_isoforms.fasta.no5merge.collapsed.gff	exon	109212745	109212931	.	-	.	gene_id "AF:1:109210590-109212745:109212931:109210590-109243290:109243441:-"; transcript_id "AF:1:109210590-109212745:109212931:109210590-109243290:109243441:-:alternative2";
1	hq_isoforms.fasta.no5merge.collapsed.gff	exon	109210490	109210590	.	-	.	gene_id "AF:1:109210590-109212745:109212931:109210590-109243290:109243441:-"; transcript_id "AF:1:109210590-109212745:109212931:109210590-109243290:109243441:-:alternative1";
1	hq_isoforms.fasta.no5merge.collapsed.gff	exon	109243290	109243441	.	-	.	gene_id "AF:1:109210590-109212745:109212931:109210590-109243290:109243441:-"; transcript_id "AF:1:109210590-109212745:109212931:109210590-109243290:109243441:-:alternative1";
1	hq_isoforms.fasta.no5merge.collapsed.gff	exon	109210490	109210590	.	-	.	gene_id "AF:1:109210590-109212745:109212931:109210590-109243044:109243441:-"; transcript_id "AF:1:109210590-109212745:109212931:109210590-109243044:109243441:-:alternative2";
1	hq_isoforms.fasta.no5merge.collapsed.gff	exon	109212745	109212931	.	-	.	gene_id "AF:1:109210590-109212745:109212931:109210590-109243044:109243441:-"; transcript_id "AF:1:109210590-109212745:109212931:109210590-109243044:109243441:-:alternative2";
1	hq_isoforms.fasta.no5merge.collapsed.gff	exon	109210490	109210590	.	-	.	gene_id "AF:1:109210590-109212745:109212931:109210590-109243044:109243441:-"; transcript_id "AF:1:109210590-109212745:109212931:109210590-109243044:109243441:-:alternative1";
1	hq_isoforms.fasta.no5merge.collapsed.gff	exon	109243044	109243441	.	-	.	gene_id "AF:1:109210590-109212745:109212931:109210590-109243044:109243441:-"; transcript_id "AF:1:109210590-109212745:109212931:109210590-109243044:109243441:-:alternative1";
1	hq_isoforms.fasta.no5merge.collapsed.gff	exon	108298672	108298772	.	-	.	gene_id "AF:1:108298772-108299120:108299524:108298772-108299601:108299620:-"; transcript_id "AF:1:108298772-108299120:108299524:108298772-108299601:108299620:-:alternative2";
1	hq_isoforms.fasta.no5merge.collapsed.gff	exon	108299120	108299524	.	-	.	gene_id "AF:1:108298772-108299120:108299524:108298772-108299601:108299620:-"; transcript_id "AF:1:108298772-108299120:108299524:108298772-108299601:108299620:-:alternative2";
1	hq_isoforms.fasta.no5merge.collapsed.gff	exon	108298672	108298772	.	-	.	gene_id "AF:1:108298772-108299120:108299524:108298772-108299601:108299620:-"; transcript_id "AF:1:108298772-108299120:108299524:108298772-108299601:108299620:-:alternative1";
1	hq_isoforms.fasta.no5merge.collapsed.gff	exon	108299601	108299620	.	-	.	gene_id "AF:1:108298772-108299120:108299524:108298772-108299601:108299620:-"; transcript_id "AF:1:108298772-108299120:108299524:108298772-108299601:108299620:-:alternative1";
1	hq_isoforms.fasta.no5merge.collapsed.gff	exon	108298672	108298772	.	-	.	gene_id "AF:1:108298772-108299120:108299524:108298772-108299601:108299710:-"; transcript_id "AF:1:108298772-108299120:108299524:108298772-108299601:108299710:-:alternative2";
1	hq_isoforms.fasta.no5merge.collapsed.gff	exon	108299120	108299524	.	-	.	gene_id "AF:1:108298772-108299120:108299524:108298772-108299601:108299710:-"; transcript_id "AF:1:108298772-108299120:108299524:108298772-108299601:108299710:-:alternative2";
1	hq_isoforms.fasta.no5merge.collapsed.gff	exon	108298672	108298772	.	-	.	gene_id "AF:1:108298772-108299120:108299524:108298772-108299601:108299710:-"; transcript_id "AF:1:108298772-108299120:108299524:108298772-108299601:108299710:-:alternative1";
1	hq_isoforms.fasta.no5merge.collapsed.gff	exon	108299601	108299710	.	-	.	gene_id "AF:1:108298772-108299120:108299524:108298772-108299601:108299710:-"; transcript_id "AF:1:108298772-108299120:108299524:108298772-108299601:108299710:-:alternative1";
1	hq_isoforms.fasta.no5merge.collapsed.gff	exon	108298672	108298772	.	-	.	gene_id "AF:1:108298772-108299120:108299524:108298772-108299601:108299853:-"; transcript_id "AF:1:108298772-108299120:108299524:108298772-108299601:108299853:-:alternative2";
1	hq_isoforms.fasta.no5merge.collapsed.gff	exon	108299120	108299524	.	-	.	gene_id "AF:1:108298772-108299120:108299524:108298772-108299601:108299853:-"; transcript_id "AF:1:108298772-108299120:108299524:108298772-108299601:108299853:-:alternative2";
1	hq_isoforms.fasta.no5merge.collapsed.gff	exon	108298672	108298772	.	-	.	gene_id "AF:1:108298772-108299120:108299524:108298772-108299601:108299853:-"; transcript_id "AF:1:108298772-108299120:108299524:108298772-108299601:108299853:-:alternative1";
1	hq_isoforms.fasta.no5merge.collapsed.gff	exon	108299601	108299853	.	-	.	gene_id "AF:1:108298772-108299120:108299524:108298772-108299601:108299853:-"; transcript_id "AF:1:108298772-108299120:108299524:108298772-108299601:108299853:-:alternative1";
1	hq_isoforms.fasta.no5merge.collapsed.gff	exon	108298672	108298772	.	-	.	gene_id "AF:1:108298772-108299120:108299524:108298772-108299601:108299657:-"; transcript_id "AF:1:108298772-108299120:108299524:108298772-108299601:108299657:-:alternative2";
1	hq_isoforms.fasta.no5merge.collapsed.gff	exon	108299120	108299524	.	-	.	gene_id "AF:1:108298772-108299120:108299524:108298772-108299601:108299657:-"; transcript_id "AF:1:108298772-108299120:108299524:108298772-108299601:108299657:-:alternative2";
1	hq_isoforms.fasta.no5merge.collapsed.gff	exon	108298672	108298772	.	-	.	gene_id "AF:1:108298772-108299120:108299524:108298772-108299601:108299657:-"; transcript_id "AF:1:108298772-108299120:108299524:108298772-108299601:108299657:-:alternative1";
1	hq_isoforms.fasta.no5merge.collapsed.gff	exon	108299601	108299657	.	-	.	gene_id "AF:1:108298772-108299120:108299524:108298772-108299601:108299657:-"; transcript_id "AF:1:108298772-108299120:108299524:108298772-108299601:108299657:-:alternative1";
1	hq_isoforms.fasta.no5merge.collapsed.gff	exon	108298672	108298772	.	-	.	gene_id "AF:1:108298772-108299120:108299524:108298772-108299601:108299706:-"; transcript_id "AF:1:108298772-108299120:108299524:108298772-108299601:108299706:-:alternative2";
1	hq_isoforms.fasta.no5merge.collapsed.gff	exon	108299120	108299524	.	-	.	gene_id "AF:1:108298772-108299120:108299524:108298772-108299601:108299706:-"; transcript_id "AF:1:108298772-108299120:108299524:108298772-108299601:108299706:-:alternative2";
1	hq_isoforms.fasta.no5merge.collapsed.gff	exon	108298672	108298772	.	-	.	gene_id "AF:1:108298772-108299120:108299524:108298772-108299601:108299706:-"; transcript_id "AF:1:108298772-108299120:108299524:108298772-108299601:108299706:-:alternative1";
1	hq_isoforms.fasta.no5merge.collapsed.gff	exon	108299601	108299706	.	-	.	gene_id "AF:1:108298772-108299120:108299524:108298772-108299601:108299706:-"; transcript_id "AF:1:108298772-108299120:108299524:108298772-108299601:108299706:-:alternative1";
1	hq_isoforms.fasta.no5merge.collapsed.gff	exon	108597325	108597425	.	-	.	gene_id "AF:1:108597425-108601112:108601542:108597425-108601578:108601610:-"; transcript_id "AF:1:108597425-108601112:108601542:108597425-108601578:108601610:-:alternative2";
1	hq_isoforms.fasta.no5merge.collapsed.gff	exon	108601112	108601542	.	-	.	gene_id "AF:1:108597425-108601112:108601542:108597425-108601578:108601610:-"; transcript_id "AF:1:108597425-108601112:108601542:108597425-108601578:108601610:-:alternative2";
1	hq_isoforms.fasta.no5merge.collapsed.gff	exon	108597325	108597425	.	-	.	gene_id "AF:1:108597425-108601112:108601542:108597425-108601578:108601610:-"; transcript_id "AF:1:108597425-108601112:108601542:108597425-108601578:108601610:-:alternative1";
1	hq_isoforms.fasta.no5merge.collapsed.gff	exon	108601578	108601610	.	-	.	gene_id "AF:1:108597425-108601112:108601542:108597425-108601578:108601610:-"; transcript_id "AF:1:108597425-108601112:108601542:108597425-108601578:108601610:-:alternative1";
1	hq_isoforms.fasta.no5merge.collapsed.gff	exon	108597325	108597425	.	-	.	gene_id "AF:1:108597425-108601112:108601542:108597425-108601578:108601601:-"; transcript_id "AF:1:108597425-108601112:108601542:108597425-108601578:108601601:-:alternative2";
1	hq_isoforms.fasta.no5merge.collapsed.gff	exon	108601112	108601542	.	-	.	gene_id "AF:1:108597425-108601112:108601542:108597425-108601578:108601601:-"; transcript_id "AF:1:108597425-108601112:108601542:108597425-108601578:108601601:-:alternative2";
1	hq_isoforms.fasta.no5merge.collapsed.gff	exon	108597325	108597425	.	-	.	gene_id "AF:1:108597425-108601112:108601542:108597425-108601578:108601601:-"; transcript_id "AF:1:108597425-108601112:108601542:108597425-108601578:108601601:-:alternative1";
1	hq_isoforms.fasta.no5merge.collapsed.gff	exon	108601578	108601601	.	-	.	gene_id "AF:1:108597425-108601112:108601542:108597425-108601578:108601601:-"; transcript_id "AF:1:108597425-108601112:108601542:108597425-108601578:108601601:-:alternative1";
1	hq_isoforms.fasta.no5merge.collapsed.gff	exon	108597325	108597425	.	-	.	gene_id "AF:1:108597425-108601112:108601542:108597425-108601578:108601597:-"; transcript_id "AF:1:108597425-108601112:108601542:108597425-108601578:108601597:-:alternative2";
1	hq_isoforms.fasta.no5merge.collapsed.gff	exon	108601112	108601542	.	-	.	gene_id "AF:1:108597425-108601112:108601542:108597425-108601578:108601597:-"; transcript_id "AF:1:108597425-108601112:108601542:108597425-108601578:108601597:-:alternative2";
1	hq_isoforms.fasta.no5merge.collapsed.gff	exon	108597325	108597425	.	-	.	gene_id "AF:1:108597425-108601112:108601542:108597425-108601578:108601597:-"; transcript_id "AF:1:108597425-108601112:108601542:108597425-108601578:108601597:-:alternative1";
1	hq_isoforms.fasta.no5merge.collapsed.gff	exon	108601578	108601597	.	-	.	gene_id "AF:1:108597425-108601112:108601542:108597425-108601578:108601597:-"; transcript_id "AF:1:108597425-108601112:108601542:108597425-108601578:108601597:-:alternative1";
1	hq_isoforms.fasta.no5merge.collapsed.gff	exon	108597325	108597425	.	-	.	gene_id "AF:1:108597425-108601112:108601542:108597425-108601578:108601600:-"; transcript_id "AF:1:108597425-108601112:108601542:108597425-108601578:108601600:-:alternative2";
1	hq_isoforms.fasta.no5merge.collapsed.gff	exon	108601112	108601542	.	-	.	gene_id "AF:1:108597425-108601112:108601542:108597425-108601578:108601600:-"; transcript_id "AF:1:108597425-108601112:108601542:108597425-108601578:108601600:-:alternative2";
1	hq_isoforms.fasta.no5merge.collapsed.gff	exon	108597325	108597425	.	-	.	gene_id "AF:1:108597425-108601112:108601542:108597425-108601578:108601600:-"; transcript_id "AF:1:108597425-108601112:108601542:108597425-108601578:108601600:-:alternative1";
1	hq_isoforms.fasta.no5merge.collapsed.gff	exon	108601578	108601600	.	-	.	gene_id "AF:1:108597425-108601112:108601542:108597425-108601578:108601600:-"; transcript_id "AF:1:108597425-108601112:108601542:108597425-108601578:108601600:-:alternative1";
1	hq_isoforms.fasta.no5merge.collapsed.gff	exon	108597325	108597425	.	-	.	gene_id "AF:1:108597425-108601112:108601551:108597425-108601578:108601610:-"; transcript_id "AF:1:108597425-108601112:108601551:108597425-108601578:108601610:-:alternative2";
1	hq_isoforms.fasta.no5merge.collapsed.gff	exon	108601112	108601551	.	-	.	gene_id "AF:1:108597425-108601112:108601551:108597425-108601578:108601610:-"; transcript_id "AF:1:108597425-108601112:108601551:108597425-108601578:108601610:-:alternative2";
1	hq_isoforms.fasta.no5merge.collapsed.gff	exon	108597325	108597425	.	-	.	gene_id "AF:1:108597425-108601112:108601551:108597425-108601578:108601610:-"; transcript_id "AF:1:108597425-108601112:108601551:108597425-108601578:108601610:-:alternative1";
1	hq_isoforms.fasta.no5merge.collapsed.gff	exon	108601578	108601610	.	-	.	gene_id "AF:1:108597425-108601112:108601551:108597425-108601578:108601610:-"; transcript_id "AF:1:108597425-108601112:108601551:108597425-108601578:108601610:-:alternative1";
1	hq_isoforms.fasta.no5merge.collapsed.gff	exon	108597325	108597425	.	-	.	gene_id "AF:1:108597425-108601112:108601551:108597425-108601578:108601601:-"; transcript_id "AF:1:108597425-108601112:108601551:108597425-108601578:108601601:-:alternative2";
1	hq_isoforms.fasta.no5merge.collapsed.gff	exon	108601112	108601551	.	-	.	gene_id "AF:1:108597425-108601112:108601551:108597425-108601578:108601601:-"; transcript_id "AF:1:108597425-108601112:108601551:108597425-108601578:108601601:-:alternative2";
1	hq_isoforms.fasta.no5merge.collapsed.gff	exon	108597325	108597425	.	-	.	gene_id "AF:1:108597425-108601112:108601551:108597425-108601578:108601601:-"; transcript_id "AF:1:108597425-108601112:108601551:108597425-108601578:108601601:-:alternative1";
1	hq_isoforms.fasta.no5merge.collapsed.gff	exon	108601578	108601601	.	-	.	gene_id "AF:1:108597425-108601112:108601551:108597425-108601578:108601601:-"; transcript_id "AF:1:108597425-108601112:108601551:108597425-108601578:108601601:-:alternative1";
1	hq_isoforms.fasta.no5merge.collapsed.gff	exon	108597325	108597425	.	-	.	gene_id "AF:1:108597425-108601112:108601551:108597425-108601578:108601597:-"; transcript_id "AF:1:108597425-108601112:108601551:108597425-108601578:108601597:-:alternative2";
1	hq_isoforms.fasta.no5merge.collapsed.gff	exon	108601112	108601551	.	-	.	gene_id "AF:1:108597425-108601112:108601551:108597425-108601578:108601597:-"; transcript_id "AF:1:108597425-108601112:108601551:108597425-108601578:108601597:-:alternative2";
1	hq_isoforms.fasta.no5merge.collapsed.gff	exon	108597325	108597425	.	-	.	gene_id "AF:1:108597425-108601112:108601551:108597425-108601578:108601597:-"; transcript_id "AF:1:108597425-108601112:108601551:108597425-108601578:108601597:-:alternative1";
1	hq_isoforms.fasta.no5merge.collapsed.gff	exon	108601578	108601597	.	-	.	gene_id "AF:1:108597425-108601112:108601551:108597425-108601578:108601597:-"; transcript_id "AF:1:108597425-108601112:108601551:108597425-108601578:108601597:-:alternative1";
1	hq_isoforms.fasta.no5merge.collapsed.gff	exon	108597325	108597425	.	-	.	gene_id "AF:1:108597425-108601112:108601551:108597425-108601578:108601600:-"; transcript_id "AF:1:108597425-108601112:108601551:108597425-108601578:108601600:-:alternative2";
1	hq_isoforms.fasta.no5merge.collapsed.gff	exon	108601112	108601551	.	-	.	gene_id "AF:1:108597425-108601112:108601551:108597425-108601578:108601600:-"; transcript_id "AF:1:108597425-108601112:108601551:108597425-108601578:108601600:-:alternative2";
1	hq_isoforms.fasta.no5merge.collapsed.gff	exon	108597325	108597425	.	-	.	gene_id "AF:1:108597425-108601112:108601551:108597425-108601578:108601600:-"; transcript_id "AF:1:108597425-108601112:108601551:108597425-108601578:108601600:-:alternative1";
1	hq_isoforms.fasta.no5merge.collapsed.gff	exon	108601578	108601600	.	-	.	gene_id "AF:1:108597425-108601112:108601551:108597425-108601578:108601600:-"; transcript_id "AF:1:108597425-108601112:108601551:108597425-108601578:108601600:-:alternative1";
1	hq_isoforms.fasta.no5merge.collapsed.gff	exon	108606640	108606740	.	-	.	gene_id "AF:1:108606740-108606989:108607093:108606740-108607214:108607278:-"; transcript_id "AF:1:108606740-108606989:108607093:108606740-108607214:108607278:-:alternative2";
1	hq_isoforms.fasta.no5merge.collapsed.gff	exon	108606989	108607093	.	-	.	gene_id "AF:1:108606740-108606989:108607093:108606740-108607214:108607278:-"; transcript_id "AF:1:108606740-108606989:108607093:108606740-108607214:108607278:-:alternative2";
1	hq_isoforms.fasta.no5merge.collapsed.gff	exon	108606640	108606740	.	-	.	gene_id "AF:1:108606740-108606989:108607093:108606740-108607214:108607278:-"; transcript_id "AF:1:108606740-108606989:108607093:108606740-108607214:108607278:-:alternative1";
1	hq_isoforms.fasta.no5merge.collapsed.gff	exon	108607214	108607278	.	-	.	gene_id "AF:1:108606740-108606989:108607093:108606740-108607214:108607278:-"; transcript_id "AF:1:108606740-108606989:108607093:108606740-108607214:108607278:-:alternative1";
1	hq_isoforms.fasta.no5merge.collapsed.gff	exon	108606640	108606740	.	-	.	gene_id "AF:1:108606740-108606989:108607093:108606740-108607214:108607279:-"; transcript_id "AF:1:108606740-108606989:108607093:108606740-108607214:108607279:-:alternative2";
1	hq_isoforms.fasta.no5merge.collapsed.gff	exon	108606989	108607093	.	-	.	gene_id "AF:1:108606740-108606989:108607093:108606740-108607214:108607279:-"; transcript_id "AF:1:108606740-108606989:108607093:108606740-108607214:108607279:-:alternative2";
1	hq_isoforms.fasta.no5merge.collapsed.gff	exon	108606640	108606740	.	-	.	gene_id "AF:1:108606740-108606989:108607093:108606740-108607214:108607279:-"; transcript_id "AF:1:108606740-108606989:108607093:108606740-108607214:108607279:-:alternative1";
1	hq_isoforms.fasta.no5merge.collapsed.gff	exon	108607214	108607279	.	-	.	gene_id "AF:1:108606740-108606989:108607093:108606740-108607214:108607279:-"; transcript_id "AF:1:108606740-108606989:108607093:108606740-108607214:108607279:-:alternative1";
1	hq_isoforms.fasta.no5merge.collapsed.gff	exon	108606640	108606740	.	-	.	gene_id "AF:1:108606740-108606989:108607093:108606740-108607122:108607215:-"; transcript_id "AF:1:108606740-108606989:108607093:108606740-108607122:108607215:-:alternative2";
1	hq_isoforms.fasta.no5merge.collapsed.gff	exon	108606989	108607093	.	-	.	gene_id "AF:1:108606740-108606989:108607093:108606740-108607122:108607215:-"; transcript_id "AF:1:108606740-108606989:108607093:108606740-108607122:108607215:-:alternative2";
1	hq_isoforms.fasta.no5merge.collapsed.gff	exon	108606640	108606740	.	-	.	gene_id "AF:1:108606740-108606989:108607093:108606740-108607122:108607215:-"; transcript_id "AF:1:108606740-108606989:108607093:108606740-108607122:108607215:-:alternative1";
1	hq_isoforms.fasta.no5merge.collapsed.gff	exon	108607122	108607215	.	-	.	gene_id "AF:1:108606740-108606989:108607093:108606740-108607122:108607215:-"; transcript_id "AF:1:108606740-108606989:108607093:108606740-108607122:108607215:-:alternative1";
1	hq_isoforms.fasta.no5merge.collapsed.gff	exon	108659905	108660005	.	-	.	gene_id "AF:1:108660005-108661205:108661888:108660005-108664168:108664316:-"; transcript_id "AF:1:108660005-108661205:108661888:108660005-108664168:108664316:-:alternative2";
1	hq_isoforms.fasta.no5merge.collapsed.gff	exon	108661205	108661888	.	-	.	gene_id "AF:1:108660005-108661205:108661888:108660005-108664168:108664316:-"; transcript_id "AF:1:108660005-108661205:108661888:108660005-108664168:108664316:-:alternative2";
1	hq_isoforms.fasta.no5merge.collapsed.gff	exon	108659905	108660005	.	-	.	gene_id "AF:1:108660005-108661205:108661888:108660005-108664168:108664316:-"; transcript_id "AF:1:108660005-108661205:108661888:108660005-108664168:108664316:-:alternative1";
1	hq_isoforms.fasta.no5merge.collapsed.gff	exon	108664168	108664316	.	-	.	gene_id "AF:1:108660005-108661205:108661888:108660005-108664168:108664316:-"; transcript_id "AF:1:108660005-108661205:108661888:108660005-108664168:108664316:-:alternative1";
1	hq_isoforms.fasta.no5merge.collapsed.gff	exon	109210490	109210590	.	-	.	gene_id "AF:1:109210590-109243044:109243289:109210590-109243290:109243441:-"; transcript_id "AF:1:109210590-109243044:109243289:109210590-109243290:109243441:-:alternative2";
1	hq_isoforms.fasta.no5merge.collapsed.gff	exon	109243044	109243289	.	-	.	gene_id "AF:1:109210590-109243044:109243289:109210590-109243290:109243441:-"; transcript_id "AF:1:109210590-109243044:109243289:109210590-109243290:109243441:-:alternative2";
1	hq_isoforms.fasta.no5merge.collapsed.gff	exon	109210490	109210590	.	-	.	gene_id "AF:1:109210590-109243044:109243289:109210590-109243290:109243441:-"; transcript_id "AF:1:109210590-109243044:109243289:109210590-109243290:109243441:-:alternative1";
1	hq_isoforms.fasta.no5merge.collapsed.gff	exon	109243290	109243441	.	-	.	gene_id "AF:1:109210590-109243044:109243289:109210590-109243290:109243441:-"; transcript_id "AF:1:109210590-109243044:109243289:109210590-109243290:109243441:-:alternative1";
1	hq_isoforms.fasta.no5merge.collapsed.gff	exon	109210490	109210590	.	-	.	gene_id "AF:1:109210590-109212745:109212889:109210590-109243044:109243289:-"; transcript_id "AF:1:109210590-109212745:109212889:109210590-109243044:109243289:-:alternative2";
1	hq_isoforms.fasta.no5merge.collapsed.gff	exon	109212745	109212889	.	-	.	gene_id "AF:1:109210590-109212745:109212889:109210590-109243044:109243289:-"; transcript_id "AF:1:109210590-109212745:109212889:109210590-109243044:109243289:-:alternative2";
1	hq_isoforms.fasta.no5merge.collapsed.gff	exon	109210490	109210590	.	-	.	gene_id "AF:1:109210590-109212745:109212889:109210590-109243044:109243289:-"; transcript_id "AF:1:109210590-109212745:109212889:109210590-109243044:109243289:-:alternative1";
1	hq_isoforms.fasta.no5merge.collapsed.gff	exon	109243044	109243289	.	-	.	gene_id "AF:1:109210590-109212745:109212889:109210590-109243044:109243289:-"; transcript_id "AF:1:109210590-109212745:109212889:109210590-109243044:109243289:-:alternative1";
1	hq_isoforms.fasta.no5merge.collapsed.gff	exon	109210490	109210590	.	-	.	gene_id "AF:1:109210590-109212745:109212889:109210590-109243044:109243325:-"; transcript_id "AF:1:109210590-109212745:109212889:109210590-109243044:109243325:-:alternative2";
1	hq_isoforms.fasta.no5merge.collapsed.gff	exon	109212745	109212889	.	-	.	gene_id "AF:1:109210590-109212745:109212889:109210590-109243044:109243325:-"; transcript_id "AF:1:109210590-109212745:109212889:109210590-109243044:109243325:-:alternative2";
1	hq_isoforms.fasta.no5merge.collapsed.gff	exon	109210490	109210590	.	-	.	gene_id "AF:1:109210590-109212745:109212889:109210590-109243044:109243325:-"; transcript_id "AF:1:109210590-109212745:109212889:109210590-109243044:109243325:-:alternative1";
1	hq_isoforms.fasta.no5merge.collapsed.gff	exon	109243044	109243325	.	-	.	gene_id "AF:1:109210590-109212745:109212889:109210590-109243044:109243325:-"; transcript_id "AF:1:109210590-109212745:109212889:109210590-109243044:109243325:-:alternative1";
1	hq_isoforms.fasta.no5merge.collapsed.gff	exon	109210490	109210590	.	-	.	gene_id "AF:1:109210590-109212745:109212889:109210590-109243290:109243441:-"; transcript_id "AF:1:109210590-109212745:109212889:109210590-109243290:109243441:-:alternative2";
1	hq_isoforms.fasta.no5merge.collapsed.gff	exon	109212745	109212889	.	-	.	gene_id "AF:1:109210590-109212745:109212889:109210590-109243290:109243441:-"; transcript_id "AF:1:109210590-109212745:109212889:109210590-109243290:109243441:-:alternative2";
1	hq_isoforms.fasta.no5merge.collapsed.gff	exon	109210490	109210590	.	-	.	gene_id "AF:1:109210590-109212745:109212889:109210590-109243290:109243441:-"; transcript_id "AF:1:109210590-109212745:109212889:109210590-109243290:109243441:-:alternative1";
1	hq_isoforms.fasta.no5merge.collapsed.gff	exon	109243290	109243441	.	-	.	gene_id "AF:1:109210590-109212745:109212889:109210590-109243290:109243441:-"; transcript_id "AF:1:109210590-109212745:109212889:109210590-109243290:109243441:-:alternative1";
1	hq_isoforms.fasta.no5merge.collapsed.gff	exon	109210490	109210590	.	-	.	gene_id "AF:1:109210590-109212745:109212889:109210590-109243044:109243441:-"; transcript_id "AF:1:109210590-109212745:109212889:109210590-109243044:109243441:-:alternative2";
1	hq_isoforms.fasta.no5merge.collapsed.gff	exon	109212745	109212889	.	-	.	gene_id "AF:1:109210590-109212745:109212889:109210590-109243044:109243441:-"; transcript_id "AF:1:109210590-109212745:109212889:109210590-109243044:109243441:-:alternative2";
1	hq_isoforms.fasta.no5merge.collapsed.gff	exon	109210490	109210590	.	-	.	gene_id "AF:1:109210590-109212745:109212889:109210590-109243044:109243441:-"; transcript_id "AF:1:109210590-109212745:109212889:109210590-109243044:109243441:-:alternative1";
1	hq_isoforms.fasta.no5merge.collapsed.gff	exon	109243044	109243441	.	-	.	gene_id "AF:1:109210590-109212745:109212889:109210590-109243044:109243441:-"; transcript_id "AF:1:109210590-109212745:109212889:109210590-109243044:109243441:-:alternative1";
1	hq_isoforms.fasta.no5merge.collapsed.gff	exon	109868390	109868490	.	-	.	gene_id "AF:1:109868490-109868859:109868890:109868490-109868910:109868976:-"; transcript_id "AF:1:109868490-109868859:109868890:109868490-109868910:109868976:-:alternative2";
1	hq_isoforms.fasta.no5merge.collapsed.gff	exon	109868859	109868890	.	-	.	gene_id "AF:1:109868490-109868859:109868890:109868490-109868910:109868976:-"; transcript_id "AF:1:109868490-109868859:109868890:109868490-109868910:109868976:-:alternative2";
1	hq_isoforms.fasta.no5merge.collapsed.gff	exon	109868390	109868490	.	-	.	gene_id "AF:1:109868490-109868859:109868890:109868490-109868910:109868976:-"; transcript_id "AF:1:109868490-109868859:109868890:109868490-109868910:109868976:-:alternative1";
1	hq_isoforms.fasta.no5merge.collapsed.gff	exon	109868910	109868976	.	-	.	gene_id "AF:1:109868490-109868859:109868890:109868490-109868910:109868976:-"; transcript_id "AF:1:109868490-109868859:109868890:109868490-109868910:109868976:-:alternative1";
1	hq_isoforms.fasta.no5merge.collapsed.gff	exon	114382136	114382236	.	-	.	gene_id "AF:1:114382236-114388136:114388497:114382236-114388506:114388596:-"; transcript_id "AF:1:114382236-114388136:114388497:114382236-114388506:114388596:-:alternative2";
1	hq_isoforms.fasta.no5merge.collapsed.gff	exon	114388136	114388497	.	-	.	gene_id "AF:1:114382236-114388136:114388497:114382236-114388506:114388596:-"; transcript_id "AF:1:114382236-114388136:114388497:114382236-114388506:114388596:-:alternative2";
1	hq_isoforms.fasta.no5merge.collapsed.gff	exon	114382136	114382236	.	-	.	gene_id "AF:1:114382236-114388136:114388497:114382236-114388506:114388596:-"; transcript_id "AF:1:114382236-114388136:114388497:114382236-114388506:114388596:-:alternative1";
1	hq_isoforms.fasta.no5merge.collapsed.gff	exon	114388506	114388596	.	-	.	gene_id "AF:1:114382236-114388136:114388497:114382236-114388506:114388596:-"; transcript_id "AF:1:114382236-114388136:114388497:114382236-114388506:114388596:-:alternative1";
1	hq_isoforms.fasta.no5merge.collapsed.gff	exon	114382136	114382236	.	-	.	gene_id "AF:1:114382236-114388136:114388497:114382236-114388506:114388609:-"; transcript_id "AF:1:114382236-114388136:114388497:114382236-114388506:114388609:-:alternative2";
1	hq_isoforms.fasta.no5merge.collapsed.gff	exon	114388136	114388497	.	-	.	gene_id "AF:1:114382236-114388136:114388497:114382236-114388506:114388609:-"; transcript_id "AF:1:114382236-114388136:114388497:114382236-114388506:114388609:-:alternative2";
1	hq_isoforms.fasta.no5merge.collapsed.gff	exon	114382136	114382236	.	-	.	gene_id "AF:1:114382236-114388136:114388497:114382236-114388506:114388609:-"; transcript_id "AF:1:114382236-114388136:114388497:114382236-114388506:114388609:-:alternative1";
1	hq_isoforms.fasta.no5merge.collapsed.gff	exon	114388506	114388609	.	-	.	gene_id "AF:1:114382236-114388136:114388497:114382236-114388506:114388609:-"; transcript_id "AF:1:114382236-114388136:114388497:114382236-114388506:114388609:-:alternative1";
1	hq_isoforms.fasta.no5merge.collapsed.gff	exon	114382136	114382236	.	-	.	gene_id "AF:1:114382236-114388136:114388497:114382236-114388506:114388610:-"; transcript_id "AF:1:114382236-114388136:114388497:114382236-114388506:114388610:-:alternative2";
1	hq_isoforms.fasta.no5merge.collapsed.gff	exon	114388136	114388497	.	-	.	gene_id "AF:1:114382236-114388136:114388497:114382236-114388506:114388610:-"; transcript_id "AF:1:114382236-114388136:114388497:114382236-114388506:114388610:-:alternative2";
1	hq_isoforms.fasta.no5merge.collapsed.gff	exon	114382136	114382236	.	-	.	gene_id "AF:1:114382236-114388136:114388497:114382236-114388506:114388610:-"; transcript_id "AF:1:114382236-114388136:114388497:114382236-114388506:114388610:-:alternative1";
1	hq_isoforms.fasta.no5merge.collapsed.gff	exon	114388506	114388610	.	-	.	gene_id "AF:1:114382236-114388136:114388497:114382236-114388506:114388610:-"; transcript_id "AF:1:114382236-114388136:114388497:114382236-114388506:114388610:-:alternative1";
1	hq_isoforms.fasta.no5merge.collapsed.gff	exon	114382136	114382236	.	-	.	gene_id "AF:1:114382236-114388136:114388497:114382236-114388506:114388600:-"; transcript_id "AF:1:114382236-114388136:114388497:114382236-114388506:114388600:-:alternative2";
1	hq_isoforms.fasta.no5merge.collapsed.gff	exon	114388136	114388497	.	-	.	gene_id "AF:1:114382236-114388136:114388497:114382236-114388506:114388600:-"; transcript_id "AF:1:114382236-114388136:114388497:114382236-114388506:114388600:-:alternative2";
1	hq_isoforms.fasta.no5merge.collapsed.gff	exon	114382136	114382236	.	-	.	gene_id "AF:1:114382236-114388136:114388497:114382236-114388506:114388600:-"; transcript_id "AF:1:114382236-114388136:114388497:114382236-114388506:114388600:-:alternative1";
1	hq_isoforms.fasta.no5merge.collapsed.gff	exon	114388506	114388600	.	-	.	gene_id "AF:1:114382236-114388136:114388497:114382236-114388506:114388600:-"; transcript_id "AF:1:114382236-114388136:114388497:114382236-114388506:114388600:-:alternative1";
1	hq_isoforms.fasta.no5merge.collapsed.gff	exon	116778382	116778482	.	-	.	gene_id "AF:1:116778482-116778853:116778892:116778482-116779854:116779918:-"; transcript_id "AF:1:116778482-116778853:116778892:116778482-116779854:116779918:-:alternative2";
1	hq_isoforms.fasta.no5merge.collapsed.gff	exon	116778853	116778892	.	-	.	gene_id "AF:1:116778482-116778853:116778892:116778482-116779854:116779918:-"; transcript_id "AF:1:116778482-116778853:116778892:116778482-116779854:116779918:-:alternative2";
1	hq_isoforms.fasta.no5merge.collapsed.gff	exon	116778382	116778482	.	-	.	gene_id "AF:1:116778482-116778853:116778892:116778482-116779854:116779918:-"; transcript_id "AF:1:116778482-116778853:116778892:116778482-116779854:116779918:-:alternative1";
1	hq_isoforms.fasta.no5merge.collapsed.gff	exon	116779854	116779918	.	-	.	gene_id "AF:1:116778482-116778853:116778892:116778482-116779854:116779918:-"; transcript_id "AF:1:116778482-116778853:116778892:116778482-116779854:116779918:-:alternative1";
1	hq_isoforms.fasta.no5merge.collapsed.gff	exon	116778382	116778482	.	-	.	gene_id "AF:1:116778482-116778853:116778892:116778482-116779854:116780026:-"; transcript_id "AF:1:116778482-116778853:116778892:116778482-116779854:116780026:-:alternative2";
1	hq_isoforms.fasta.no5merge.collapsed.gff	exon	116778853	116778892	.	-	.	gene_id "AF:1:116778482-116778853:116778892:116778482-116779854:116780026:-"; transcript_id "AF:1:116778482-116778853:116778892:116778482-116779854:116780026:-:alternative2";
1	hq_isoforms.fasta.no5merge.collapsed.gff	exon	116778382	116778482	.	-	.	gene_id "AF:1:116778482-116778853:116778892:116778482-116779854:116780026:-"; transcript_id "AF:1:116778482-116778853:116778892:116778482-116779854:116780026:-:alternative1";
1	hq_isoforms.fasta.no5merge.collapsed.gff	exon	116779854	116780026	.	-	.	gene_id "AF:1:116778482-116778853:116778892:116778482-116779854:116780026:-"; transcript_id "AF:1:116778482-116778853:116778892:116778482-116779854:116780026:-:alternative1";
1	hq_isoforms.fasta.no5merge.collapsed.gff	exon	116778382	116778482	.	-	.	gene_id "AF:1:116778482-116778853:116778926:116778482-116779854:116779918:-"; transcript_id "AF:1:116778482-116778853:116778926:116778482-116779854:116779918:-:alternative2";
1	hq_isoforms.fasta.no5merge.collapsed.gff	exon	116778853	116778926	.	-	.	gene_id "AF:1:116778482-116778853:116778926:116778482-116779854:116779918:-"; transcript_id "AF:1:116778482-116778853:116778926:116778482-116779854:116779918:-:alternative2";
1	hq_isoforms.fasta.no5merge.collapsed.gff	exon	116778382	116778482	.	-	.	gene_id "AF:1:116778482-116778853:116778926:116778482-116779854:116779918:-"; transcript_id "AF:1:116778482-116778853:116778926:116778482-116779854:116779918:-:alternative1";
1	hq_isoforms.fasta.no5merge.collapsed.gff	exon	116779854	116779918	.	-	.	gene_id "AF:1:116778482-116778853:116778926:116778482-116779854:116779918:-"; transcript_id "AF:1:116778482-116778853:116778926:116778482-116779854:116779918:-:alternative1";
1	hq_isoforms.fasta.no5merge.collapsed.gff	exon	116778382	116778482	.	-	.	gene_id "AF:1:116778482-116778853:116778926:116778482-116779854:116780026:-"; transcript_id "AF:1:116778482-116778853:116778926:116778482-116779854:116780026:-:alternative2";
1	hq_isoforms.fasta.no5merge.collapsed.gff	exon	116778853	116778926	.	-	.	gene_id "AF:1:116778482-116778853:116778926:116778482-116779854:116780026:-"; transcript_id "AF:1:116778482-116778853:116778926:116778482-116779854:116780026:-:alternative2";
1	hq_isoforms.fasta.no5merge.collapsed.gff	exon	116778382	116778482	.	-	.	gene_id "AF:1:116778482-116778853:116778926:116778482-116779854:116780026:-"; transcript_id "AF:1:116778482-116778853:116778926:116778482-116779854:116780026:-:alternative1";
1	hq_isoforms.fasta.no5merge.collapsed.gff	exon	116779854	116780026	.	-	.	gene_id "AF:1:116778482-116778853:116778926:116778482-116779854:116780026:-"; transcript_id "AF:1:116778482-116778853:116778926:116778482-116779854:116780026:-:alternative1";
1	hq_isoforms.fasta.no5merge.collapsed.gff	exon	116778382	116778482	.	-	.	gene_id "AF:1:116778482-116778853:116778919:116778482-116779854:116779918:-"; transcript_id "AF:1:116778482-116778853:116778919:116778482-116779854:116779918:-:alternative2";
1	hq_isoforms.fasta.no5merge.collapsed.gff	exon	116778853	116778919	.	-	.	gene_id "AF:1:116778482-116778853:116778919:116778482-116779854:116779918:-"; transcript_id "AF:1:116778482-116778853:116778919:116778482-116779854:116779918:-:alternative2";
1	hq_isoforms.fasta.no5merge.collapsed.gff	exon	116778382	116778482	.	-	.	gene_id "AF:1:116778482-116778853:116778919:116778482-116779854:116779918:-"; transcript_id "AF:1:116778482-116778853:116778919:116778482-116779854:116779918:-:alternative1";
1	hq_isoforms.fasta.no5merge.collapsed.gff	exon	116779854	116779918	.	-	.	gene_id "AF:1:116778482-116778853:116778919:116778482-116779854:116779918:-"; transcript_id "AF:1:116778482-116778853:116778919:116778482-116779854:116779918:-:alternative1";
1	hq_isoforms.fasta.no5merge.collapsed.gff	exon	116778382	116778482	.	-	.	gene_id "AF:1:116778482-116778853:116778919:116778482-116779854:116780026:-"; transcript_id "AF:1:116778482-116778853:116778919:116778482-116779854:116780026:-:alternative2";
1	hq_isoforms.fasta.no5merge.collapsed.gff	exon	116778853	116778919	.	-	.	gene_id "AF:1:116778482-116778853:116778919:116778482-116779854:116780026:-"; transcript_id "AF:1:116778482-116778853:116778919:116778482-116779854:116780026:-:alternative2";
1	hq_isoforms.fasta.no5merge.collapsed.gff	exon	116778382	116778482	.	-	.	gene_id "AF:1:116778482-116778853:116778919:116778482-116779854:116780026:-"; transcript_id "AF:1:116778482-116778853:116778919:116778482-116779854:116780026:-:alternative1";
1	hq_isoforms.fasta.no5merge.collapsed.gff	exon	116779854	116780026	.	-	.	gene_id "AF:1:116778482-116778853:116778919:116778482-116779854:116780026:-"; transcript_id "AF:1:116778482-116778853:116778919:116778482-116779854:116780026:-:alternative1";
1	hq_isoforms.fasta.no5merge.collapsed.gff	exon	116778382	116778482	.	-	.	gene_id "AF:1:116778482-116778853:116778898:116778482-116779854:116779918:-"; transcript_id "AF:1:116778482-116778853:116778898:116778482-116779854:116779918:-:alternative2";
1	hq_isoforms.fasta.no5merge.collapsed.gff	exon	116778853	116778898	.	-	.	gene_id "AF:1:116778482-116778853:116778898:116778482-116779854:116779918:-"; transcript_id "AF:1:116778482-116778853:116778898:116778482-116779854:116779918:-:alternative2";
1	hq_isoforms.fasta.no5merge.collapsed.gff	exon	116778382	116778482	.	-	.	gene_id "AF:1:116778482-116778853:116778898:116778482-116779854:116779918:-"; transcript_id "AF:1:116778482-116778853:116778898:116778482-116779854:116779918:-:alternative1";
1	hq_isoforms.fasta.no5merge.collapsed.gff	exon	116779854	116779918	.	-	.	gene_id "AF:1:116778482-116778853:116778898:116778482-116779854:116779918:-"; transcript_id "AF:1:116778482-116778853:116778898:116778482-116779854:116779918:-:alternative1";
1	hq_isoforms.fasta.no5merge.collapsed.gff	exon	116778382	116778482	.	-	.	gene_id "AF:1:116778482-116778853:116778898:116778482-116779854:116780026:-"; transcript_id "AF:1:116778482-116778853:116778898:116778482-116779854:116780026:-:alternative2";
1	hq_isoforms.fasta.no5merge.collapsed.gff	exon	116778853	116778898	.	-	.	gene_id "AF:1:116778482-116778853:116778898:116778482-116779854:116780026:-"; transcript_id "AF:1:116778482-116778853:116778898:116778482-116779854:116780026:-:alternative2";
1	hq_isoforms.fasta.no5merge.collapsed.gff	exon	116778382	116778482	.	-	.	gene_id "AF:1:116778482-116778853:116778898:116778482-116779854:116780026:-"; transcript_id "AF:1:116778482-116778853:116778898:116778482-116779854:116780026:-:alternative1";
1	hq_isoforms.fasta.no5merge.collapsed.gff	exon	116779854	116780026	.	-	.	gene_id "AF:1:116778482-116778853:116778898:116778482-116779854:116780026:-"; transcript_id "AF:1:116778482-116778853:116778898:116778482-116779854:116780026:-:alternative1";
1	hq_isoforms.fasta.no5merge.collapsed.gff	exon	116778382	116778482	.	-	.	gene_id "AF:1:116778482-116778853:116778939:116778482-116779854:116779918:-"; transcript_id "AF:1:116778482-116778853:116778939:116778482-116779854:116779918:-:alternative2";
1	hq_isoforms.fasta.no5merge.collapsed.gff	exon	116778853	116778939	.	-	.	gene_id "AF:1:116778482-116778853:116778939:116778482-116779854:116779918:-"; transcript_id "AF:1:116778482-116778853:116778939:116778482-116779854:116779918:-:alternative2";
1	hq_isoforms.fasta.no5merge.collapsed.gff	exon	116778382	116778482	.	-	.	gene_id "AF:1:116778482-116778853:116778939:116778482-116779854:116779918:-"; transcript_id "AF:1:116778482-116778853:116778939:116778482-116779854:116779918:-:alternative1";
1	hq_isoforms.fasta.no5merge.collapsed.gff	exon	116779854	116779918	.	-	.	gene_id "AF:1:116778482-116778853:116778939:116778482-116779854:116779918:-"; transcript_id "AF:1:116778482-116778853:116778939:116778482-116779854:116779918:-:alternative1";
1	hq_isoforms.fasta.no5merge.collapsed.gff	exon	116778382	116778482	.	-	.	gene_id "AF:1:116778482-116778853:116778939:116778482-116779854:116780026:-"; transcript_id "AF:1:116778482-116778853:116778939:116778482-116779854:116780026:-:alternative2";
1	hq_isoforms.fasta.no5merge.collapsed.gff	exon	116778853	116778939	.	-	.	gene_id "AF:1:116778482-116778853:116778939:116778482-116779854:116780026:-"; transcript_id "AF:1:116778482-116778853:116778939:116778482-116779854:116780026:-:alternative2";
1	hq_isoforms.fasta.no5merge.collapsed.gff	exon	116778382	116778482	.	-	.	gene_id "AF:1:116778482-116778853:116778939:116778482-116779854:116780026:-"; transcript_id "AF:1:116778482-116778853:116778939:116778482-116779854:116780026:-:alternative1";
1	hq_isoforms.fasta.no5merge.collapsed.gff	exon	116779854	116780026	.	-	.	gene_id "AF:1:116778482-116778853:116778939:116778482-116779854:116780026:-"; transcript_id "AF:1:116778482-116778853:116778939:116778482-116779854:116780026:-:alternative1";
1	hq_isoforms.fasta.no5merge.collapsed.gff	exon	116778382	116778482	.	-	.	gene_id "AF:1:116778482-116778853:116778976:116778482-116779854:116779918:-"; transcript_id "AF:1:116778482-116778853:116778976:116778482-116779854:116779918:-:alternative2";
1	hq_isoforms.fasta.no5merge.collapsed.gff	exon	116778853	116778976	.	-	.	gene_id "AF:1:116778482-116778853:116778976:116778482-116779854:116779918:-"; transcript_id "AF:1:116778482-116778853:116778976:116778482-116779854:116779918:-:alternative2";
1	hq_isoforms.fasta.no5merge.collapsed.gff	exon	116778382	116778482	.	-	.	gene_id "AF:1:116778482-116778853:116778976:116778482-116779854:116779918:-"; transcript_id "AF:1:116778482-116778853:116778976:116778482-116779854:116779918:-:alternative1";
1	hq_isoforms.fasta.no5merge.collapsed.gff	exon	116779854	116779918	.	-	.	gene_id "AF:1:116778482-116778853:116778976:116778482-116779854:116779918:-"; transcript_id "AF:1:116778482-116778853:116778976:116778482-116779854:116779918:-:alternative1";
1	hq_isoforms.fasta.no5merge.collapsed.gff	exon	116778382	116778482	.	-	.	gene_id "AF:1:116778482-116778853:116778976:116778482-116779854:116780026:-"; transcript_id "AF:1:116778482-116778853:116778976:116778482-116779854:116780026:-:alternative2";
1	hq_isoforms.fasta.no5merge.collapsed.gff	exon	116778853	116778976	.	-	.	gene_id "AF:1:116778482-116778853:116778976:116778482-116779854:116780026:-"; transcript_id "AF:1:116778482-116778853:116778976:116778482-116779854:116780026:-:alternative2";
1	hq_isoforms.fasta.no5merge.collapsed.gff	exon	116778382	116778482	.	-	.	gene_id "AF:1:116778482-116778853:116778976:116778482-116779854:116780026:-"; transcript_id "AF:1:116778482-116778853:116778976:116778482-116779854:116780026:-:alternative1";
1	hq_isoforms.fasta.no5merge.collapsed.gff	exon	116779854	116780026	.	-	.	gene_id "AF:1:116778482-116778853:116778976:116778482-116779854:116780026:-"; transcript_id "AF:1:116778482-116778853:116778976:116778482-116779854:116780026:-:alternative1";
1	hq_isoforms.fasta.no5merge.collapsed.gff	exon	120366979	120367079	.	-	.	gene_id "AF:1:120367079-120367497:120367582:120367079-120368132:120368184:-"; transcript_id "AF:1:120367079-120367497:120367582:120367079-120368132:120368184:-:alternative2";
1	hq_isoforms.fasta.no5merge.collapsed.gff	exon	120367497	120367582	.	-	.	gene_id "AF:1:120367079-120367497:120367582:120367079-120368132:120368184:-"; transcript_id "AF:1:120367079-120367497:120367582:120367079-120368132:120368184:-:alternative2";
1	hq_isoforms.fasta.no5merge.collapsed.gff	exon	120366979	120367079	.	-	.	gene_id "AF:1:120367079-120367497:120367582:120367079-120368132:120368184:-"; transcript_id "AF:1:120367079-120367497:120367582:120367079-120368132:120368184:-:alternative1";
1	hq_isoforms.fasta.no5merge.collapsed.gff	exon	120368132	120368184	.	-	.	gene_id "AF:1:120367079-120367497:120367582:120367079-120368132:120368184:-"; transcript_id "AF:1:120367079-120367497:120367582:120367079-120368132:120368184:-:alternative1";
1	hq_isoforms.fasta.no5merge.collapsed.gff	exon	120366979	120367079	.	-	.	gene_id "AF:1:120367079-120367497:120367571:120367079-120368132:120368184:-"; transcript_id "AF:1:120367079-120367497:120367571:120367079-120368132:120368184:-:alternative2";
1	hq_isoforms.fasta.no5merge.collapsed.gff	exon	120367497	120367571	.	-	.	gene_id "AF:1:120367079-120367497:120367571:120367079-120368132:120368184:-"; transcript_id "AF:1:120367079-120367497:120367571:120367079-120368132:120368184:-:alternative2";
1	hq_isoforms.fasta.no5merge.collapsed.gff	exon	120366979	120367079	.	-	.	gene_id "AF:1:120367079-120367497:120367571:120367079-120368132:120368184:-"; transcript_id "AF:1:120367079-120367497:120367571:120367079-120368132:120368184:-:alternative1";
1	hq_isoforms.fasta.no5merge.collapsed.gff	exon	120368132	120368184	.	-	.	gene_id "AF:1:120367079-120367497:120367571:120367079-120368132:120368184:-"; transcript_id "AF:1:120367079-120367497:120367571:120367079-120368132:120368184:-:alternative1";
1	hq_isoforms.fasta.no5merge.collapsed.gff	exon	120366979	120367079	.	-	.	gene_id "AF:1:120367079-120367497:120367576:120367079-120368132:120368184:-"; transcript_id "AF:1:120367079-120367497:120367576:120367079-120368132:120368184:-:alternative2";
1	hq_isoforms.fasta.no5merge.collapsed.gff	exon	120367497	120367576	.	-	.	gene_id "AF:1:120367079-120367497:120367576:120367079-120368132:120368184:-"; transcript_id "AF:1:120367079-120367497:120367576:120367079-120368132:120368184:-:alternative2";
1	hq_isoforms.fasta.no5merge.collapsed.gff	exon	120366979	120367079	.	-	.	gene_id "AF:1:120367079-120367497:120367576:120367079-120368132:120368184:-"; transcript_id "AF:1:120367079-120367497:120367576:120367079-120368132:120368184:-:alternative1";
1	hq_isoforms.fasta.no5merge.collapsed.gff	exon	120368132	120368184	.	-	.	gene_id "AF:1:120367079-120367497:120367576:120367079-120368132:120368184:-"; transcript_id "AF:1:120367079-120367497:120367576:120367079-120368132:120368184:-:alternative1";
1	hq_isoforms.fasta.no5merge.collapsed.gff	exon	123519734	123519834	.	-	.	gene_id "AF:1:123519834-123520305:123520452:123519834-123522410:123522618:-"; transcript_id "AF:1:123519834-123520305:123520452:123519834-123522410:123522618:-:alternative2";
1	hq_isoforms.fasta.no5merge.collapsed.gff	exon	123520305	123520452	.	-	.	gene_id "AF:1:123519834-123520305:123520452:123519834-123522410:123522618:-"; transcript_id "AF:1:123519834-123520305:123520452:123519834-123522410:123522618:-:alternative2";
[truncated: 29,274 more rows]
